# Supplementary material
Source: Research Square preprint supplement (doi:10.21203/rs.3.rs-9020477/v1)
Supplement: Supplementary file 1 [file 1044b7d2f7dde0de4d9463ef.xlsx]

## Sheet: Sheet1
Pyrus communis cv. Bartlett-v1	Pyrus communis cv. Bartlett-v2	Pyrus pyrifolia cv. Cuiguan	FPKM.ZJ1	FPKM.ZJ2	FPKM.ZJ3	FPKM.CGJ1	FPKM.CGJ2	FPKM.CGJ3
PCP021047	pycom16g01950	EVM0011892	0	0	0	0	0	0
.	.	EVM0015682	0	0.043776	0.067593	0.780597	1.86576	1.0802
.	.	EVM0022746	84.8822	82.3859	70.1363	79.0033	80.068	78.2409
.	pycom16g01960	.
.	pycom16g01970	EVM0001689	13.1884	15.3692	17.3918	57.5732	58.7654	48.676
PCP021046	pycom16g01980	EVM0041228	38.1543	39.0454	37.3688	7.8384	10.495	11.1566
PCP021045	pycom16g01990	EVM0014846	4.46399	4.23638	3.78771	4.42049	4.40625	4.34699
PCP021044	pycom16g02000	EVM0032876	62.2423	61.6116	61.655	41.186	42.152	41.4947
PCP021043	pycom16g02010	EVM0030145	10.0229	8.65779	10.0253	8.2113	8.39853	7.89023
PCP021042	pycom16g02020	EVM0028228	11.984	10.0871	12.8699	12.0927	10.298	11.5294
PCP021041	pycom16g02030	EVM0030563	24.2256	24.7973	26.5755	34.5847	31.515	26.2726
.	.	EVM0013497	12.4452	14.7079	11.4268	12.7851	10.8776	11.8316
PCP021040	.	.
PCP021039	pycom16g02040	EVM0008593	1.81194	2.02778	3.1764	1.19	0.50088	1.65976
PCP021038	pycom16g02050	EVM0034024	43.3614	36.0624	34.7705	40.8314	39.0003	35.844
.	.	EVM0005700	48.85	57.7212	48.4278	196.006	169.188	177.561
PCP021037	.	.
PCP021036	pycom16g02060	EVM0031443	0.557391	1.28729	1.89171	1.82721	1.91581	1.21289
.	.	EVM0042524	0.119218	0.081256	0	0.070741	0.103838	0.109781
PCP041895	.	.
PCP021035	pycom16g02080	EVM0016994	0.103596	0	0.130276	0	0	0
.	.	EVM0001713
.	.	EVM0032380
PCP021034	pycom16g02110	EVM0003273	0	0	0	0	0	0
.	.	EVM0009789	0.347127	0.164487	0.524922	0.945297	0.644844	1.45073
PCP021033	.	.
PCP021032	.	.
PCP044116	.	.
PCP021031	.	.
PCP021030	.	.
PCP041894	.	.
PCP021029	.	.
PCP021028	.	.
PCP041893	.	.
PCP021027	pycom16g02120	EVM0029249	67.7984	48.0327	56.8745	188.255	181.233	241.932
.	.	EVM0021107	0	0	0	0	0	0.134968
.	.	EVM0008448	0.637746	0	0	0	0	0
.	pycom16g02130	.
.	pycom16g02150	.
.	pycom16g02160	.
PCP021026	.	.
PCP021025	pycom16g02170	EVM0008541	6.93659	7.84433	6.97533	1.87896	0.518303	3.15232
.	.	EVM0027056	19.6197	25.6346	19.567	0.347353	0.177563	1.67089
.	.	EVM0004698	7.30849	7.66855	4.79931	2.49723	1.92237	3.94815
.	.	EVM0022781	7.47471	10.5564	6.4256	0	0	0
.	.	EVM0037848	42.4159	30.321	29.761	71.5791	70.9615	74.7383
.	.	EVM0038290	30.1522	48.3858	28.3029	0	0	0
.	pycom16g02180	.
.	pycom16g02200	.
.	pycom16g02210	.
PCP041892	.	.
PCP021024	pycom16g02220	EVM0023772	7.69803	7.42367	6.52308	6.63398	6.96117	7.06858
.	.	EVM0037992	0.392915	1.43589	1.27205	19.6218	19.7566	28.1205
PCP041891	.	.
PCP021023	pycom16g02230	EVM0040730	0	0	0	0.094066	0	0
PCP044117	pycom16g02240	EVM0037965	105.119	113.596	103.937	26.6649	26.934	25.1449
PCP041890	pycom16g02250	EVM0027353	6.71703	6.03678	6.91207	8.62896	8.53697	9.23884
PCP021022	pycom16g02260	EVM0032210	65.3251	57.5714	60.4048	140.737	116.454	161.969
PCP021021	pycom16g02270	EVM0038319	2.17272	1.57544	1.98124	0.73416	1.09713	1.06658
.	pycom16g02280	.
PCP041889	pycom16g02290	EVM0009195	29.6326	30.8121	28.9216	31.1612	28.5222	30.6084
PCP041888	pycom16g02300	EVM0008135	13.0552	12.5534	13.2582	12.5297	12.6597	10.923
PCP021020	pycom16g02310	EVM0029590	21.9966	30.5471	27.1197	21.0895	22.7816	20.1604
PCP021019	pycom16g02320	EVM0025463	5.62717	4.84357	3.72641	5.51132	6.29337	8.22832
PCP041887	.	.
PCP041886	.	.
PCP021018	pycom16g02330	EVM0021367	35.3533	44.8631	59.73	4.12561	4.94514	6.07637
.	pycom16g02340	EVM0000276	3.52142	3.70628	3.60315	4.54375	4.0938	4.15508
PCP021017	pycom16g02350	EVM0015543	6.62628	3.2933	5.33841	8.41574	9.47547	9.78614
.	pycom16g02370	.
PCP021016	pycom16g02380	EVM0020339	8.21782	10.2479	9.74184	14.5965	13.9462	11.1923
.	pycom16g02390	.
.	pycom16g02400	EVM0040445
PCP021015	pycom16g02410	EVM0023031	4.29988	4.30654	4.26602	6.23715	6.82787	5.47019
PCP021014	pycom16g02420	EVM0012736	49.3793	53.1324	50.6244	33.9046	33.4973	34.2217
.	.	EVM0006206	46.4855	51.9226	46.6708	53.2421	60.5985	73.1263
PCP021013	.	.
PCP041885	pycom16g02430	EVM0038553	2.77513	3.12603	2.5137	0.3578	0.278373	0.685845
PCP021012	pycom16g02440	EVM0021814	31.4839	28.1918	29.8004	19.8497	21.8726	18.5959
PCP021011	.	.
PCP041884	pycom16g02450	EVM0038745	6.72538	4.3995	4.19888	12.8014	12.0035	18.6121
PCP041883	pycom16g02470	EVM0035171	28.4349	33.1427	26.3151	35.5338	36.2776	33.9806
.	.	EVM0001092	1.66077	1.22533	1.18139	1.4076	0.765437	1.18944
PCP021010	pycom16g02480	EVM0038336	3.75929	4.04423	4.31424	5.79283	5.6536	4.90926
.	pycom16g02490	.
.	pycom16g02500	.
PCP021009	pycom16g02510	EVM0028464	0.072203	0.093008	0.420207	0.083003	0.336159	0.204393
PCP021008	pycom16g02520	EVM0011700	4.24792	4.46483	4.11928	16.4548	15.9301	13.2759
