# Supplementary material
Source: Research Square preprint supplement (doi:10.21203/rs.3.rs-9020477/v1)
Supplement: Supplementary file 2 [file 37ff3285e8e39d698e50e001.xlsx]

## Sheet: shoot apex
gene_id	gene_name	EntrezID	transcript_id	GO	KEGG	KO_ENTRY	EC	TF_Family	Description	trans_type	FPKM.ZJ1	FPKM.ZJ2	FPKM.ZJ3	FPKM.CGJ1	FPKM.CGJ2	FPKM.CGJ3	fc	log2(fc)	pval	qval	regulation	significant
EVM0040183	EVM0040183		EVM0040183.1	GO:0003677(DNA binding);GO:0003700(DNA binding transcription factor activity);GO:0005634(nucleus);GO:0006351(transcription, DNA-templated);GO:0006355(regulation of transcription, DNA-templated);GO:0007276(gamete generation);GO:0009908(flower development);GO:0010492(maintenance of shoot apical meristem identity);GO:0019760(glucosinolate metabolic process);GO:0030154(cell differentiation);GO:004212…				AP2/ERF-AP2	PREDICTED: AP2-like ethylene-responsive transcription factor ANT isoform X1 [Pyrus x bretschneideri]	mrna	1.13249	1.08223	1.2488	19.4856	17.2366	13.47	0.0690052	-3.85715	3.536e-99	2.53427e-97	down	yes
EVM0026521	EVM0026521		EVM0026521.1	GO:0003677(DNA binding);GO:0003700(DNA binding transcription factor activity);GO:0005634(nucleus);GO:0006351(transcription, DNA-templated);GO:0006355(regulation of transcription, DNA-templated);GO:0007276(gamete generation);GO:0009908(flower development);GO:0010492(maintenance of shoot apical meristem identity);GO:0019760(glucosinolate metabolic process);GO:0030154(cell differentiation);GO:004212…				AP2/ERF-AP2	PREDICTED: AP2-like ethylene-responsive transcription factor ANT isoform X1 [Pyrus x bretschneideri]	mrna	1.58886	1.39539	1.43091	12.0116	12.8784	11.4274	0.121571	-3.04012	7.05737e-93	4.46556e-91	down	yes
EVM0021661	EVM0021661		EVM0021661.1	GO:0003677(DNA binding);GO:0003700(DNA binding transcription factor activity);GO:0005634(nucleus);GO:0006351(transcription, DNA-templated);GO:0006355(regulation of transcription, DNA-templated);GO:0007276(gamete generation);GO:0009908(flower development);GO:0010492(maintenance of shoot apical meristem identity);GO:0019760(glucosinolate metabolic process);GO:0030154(cell differentiation);GO:004212…				AP2/ERF-AP2	PREDICTED: AP2-like ethylene-responsive transcription factor ANT [Malus domestica]	mrna	11.6538	13.3928	11.5289	40.0335	35.9357	30.4173	0.343799	-1.54036	1.58913e-28	1.75952e-27	down	yes
EVM0002723	EVM0002723		EVM0002723.1	GO:0003677(DNA binding);GO:0003700(DNA binding transcription factor activity);GO:0005634(nucleus);GO:0006351(transcription, DNA-templated);GO:0006355(regulation of transcription, DNA-templated);GO:0007276(gamete generation);GO:0009908(flower development);GO:0010492(maintenance of shoot apical meristem identity);GO:0019760(glucosinolate metabolic process);GO:0030154(cell differentiation);GO:004212…				AP2/ERF-AP2	PREDICTED: AP2-like ethylene-responsive transcription factor ANT [Pyrus x bretschneideri]	mrna	4.31449	2.82606	3.33458	13.3909	12.4707	12.3377	0.274222	-1.86658	6.67287e-25	6.3474e-24	down	yes
EVM0012281	EVM0012281		EVM0012281.1	GO:0000976(transcription regulatory region sequence-specific DNA binding);GO:0000981(RNA polymerase II transcription factor activity, sequence-specific DNA binding);GO:0003677(DNA binding);GO:0003700(DNA binding transcription factor activity);GO:0005634(nucleus);GO:0006351(transcription, DNA-templated);GO:0006355(regulation of transcription, DNA-templated);GO:0007275(multicellular organism develo…				AP2/ERF-AP2	PREDICTED: ethylene-responsive transcription factor WRI1 [Pyrus x bretschneideri]	mrna	2.1495	2.30737	2.07996	0.555974	1.01606	1.06438	2.47944	1.31002	7.63712e-06	2.01806e-05	up	yes
EVM0038507	EVM0038507		EVM0038507.1	GO:0003677(DNA binding);GO:0003700(DNA binding transcription factor activity);GO:0005634(nucleus);GO:0006351(transcription, DNA-templated);GO:0006355(regulation of transcription, DNA-templated);GO:0007275(multicellular organism development);GO:0009873(ethylene-activated signaling pathway);GO:0010311(lateral root formation);GO:0010492(maintenance of shoot apical meristem identity);GO:0060771(phyll…				AP2/ERF-AP2	PREDICTED: AP2-like ethylene-responsive transcription factor AIL6 [Pyrus x bretschneideri]	mrna	0.682855	1.20578	0.978717	2.35768	3.15424	2.10623	0.376384	-1.40972	1.4551e-05	3.72922e-05	down	yes
EVM0024582	EVM0024582		EVM0024582.1	GO:0000976(transcription regulatory region sequence-specific DNA binding);GO:0000981(RNA polymerase II transcription factor activity, sequence-specific DNA binding);GO:0003677(DNA binding);GO:0003700(DNA binding transcription factor activity);GO:0005634(nucleus);GO:0006351(transcription, DNA-templated);GO:0006355(regulation of transcription, DNA-templated);GO:0007275(multicellular organism develo…				AP2/ERF-AP2	AP2-like ethylene-responsive transcription factor, partial [Malus hybrid cultivar]	mrna	0.276654	0.053075	0.289531	0	0	0	2064.2	11.0114	0.000388965	0.00084027	up	yes
EVM0005627	EVM0005627		EVM0005627.1	GO:0000976(transcription regulatory region sequence-specific DNA binding);GO:0000981(RNA polymerase II transcription factor activity, sequence-specific DNA binding);GO:0003677(DNA binding);GO:0003700(DNA binding transcription factor activity);GO:0005634(nucleus);GO:0006351(transcription, DNA-templated);GO:0006355(regulation of transcription, DNA-templated);GO:0007275(multicellular organism develo…				AP2/ERF-AP2	AP2-like ethylene-responsive transcription factor, partial [Malus hybrid cultivar]	mrna	0.444152	0.422628	0.376853	0.05998	0	0.144024	6.09612	2.60789	0.00620406	0.0112335	up	yes
EVM0029102	EVM0029102		EVM0029102.1	GO:0003677(DNA binding);GO:0003700(DNA binding transcription factor activity);GO:0005634(nucleus);GO:0006351(transcription, DNA-templated);GO:0006355(regulation of transcription, DNA-templated);GO:0007275(multicellular organism development);GO:0009873(ethylene-activated signaling pathway);GO:0010311(lateral root formation);GO:0010492(maintenance of shoot apical meristem identity);GO:0060771(phyll…				AP2/ERF-AP2	PREDICTED: AP2-like ethylene-responsive transcription factor AIL6 [Pyrus x bretschneideri]	mrna	0.582953	0.4715	0.716844	1.21794	1.32529	1.07902	0.489006	-1.03208	0.0107707	0.0186807	down	yes
EVM0034013	EVM0034013		EVM0034013.1	GO:0001666(response to hypoxia);GO:0003677(DNA binding);GO:0003700(DNA binding transcription factor activity);GO:0005515(protein binding);GO:0005634(nucleus);GO:0005886(plasma membrane);GO:0006351(transcription, DNA-templated);GO:0006355(regulation of transcription, DNA-templated);GO:0009873(ethylene-activated signaling pathway);GO:0043565(sequence-specific DNA binding);GO:0070483(detection of hy…				AP2/ERF-ERF	ethylene-responsive transcription factor ERF071-like [Malus domestica]	mrna	173.536	164.494	177.15	18.1367	16.6666	18.6424	9.6393	3.26893	0	0	up	yes
EVM0023502	EVM0023502		EVM0023502.1	GO:0001666(response to hypoxia);GO:0003677(DNA binding);GO:0003700(DNA binding transcription factor activity);GO:0005515(protein binding);GO:0005634(nucleus);GO:0006351(transcription, DNA-templated);GO:0006355(regulation of transcription, DNA-templated);GO:0009873(ethylene-activated signaling pathway);GO:0010468(regulation of gene expression)				AP2/ERF-ERF	PREDICTED: ethylene-responsive transcription factor ERF073-like [Pyrus x bretschneideri]	mrna	197.797	202.847	217.74	9.05603	8.34188	10.5953	22.0905	4.46535	0	0	up	yes
EVM0036678	EVM0036678		EVM0036678.1	GO:0003677(DNA binding);GO:0003700(DNA binding transcription factor activity);GO:0005634(nucleus);GO:0005643(nuclear pore);GO:0006351(transcription, DNA-templated);GO:0006355(regulation of transcription, DNA-templated);GO:0006952(defense response);GO:0009873(ethylene-activated signaling pathway);GO:0010087(phloem or xylem histogenesis);GO:0010200(response to chitin);GO:0045893(positive regulation…	04626(Plant-pathogen interaction)	K13433		AP2/ERF-ERF	PREDICTED: pathogenesis-related genes transcriptional activator PTI5-like [Pyrus x bretschneideri]	mrna	220.932	245.466	259.097	2.55353	3.0191	2.92733	85.3528	6.41537	0	0	up	yes
EVM0014226	EVM0014226		EVM0014226.1	GO:0003700(DNA binding transcription factor activity);GO:0005634(nucleus);GO:0043565(sequence-specific DNA binding);GO:0044212(transcription regulatory region DNA binding);GO:0045893(positive regulation of transcription, DNA-templated)				AP2/ERF-ERF	PREDICTED: dehydration-responsive element-binding protein 2A-like [Pyrus x bretschneideri]	mrna	19.1856	17.3642	16.1072	0.404381	0.417682	0.706627	34.4458	5.10626	1.1247e-155	2.1496e-153	up	yes
EVM0015862	EVM0015862		EVM0015862.1	GO:0005737(cytoplasm);GO:0006952(defense response);GO:0007165(signal transduction);GO:0016021(integral component of membrane);GO:0043531(ADP binding)				AP2/ERF-ERF	PREDICTED: TMV resistance protein N-like [Pyrus x bretschneideri]	mrna	0.294048	0.367718	0.271791	5.86057	6.0466	5.58828	0.05336	-4.2281	3.6175e-136	5.1263e-134	down	yes
EVM0018192	EVM0018192		EVM0018192.1	GO:0003677(DNA binding);GO:0003700(DNA binding transcription factor activity);GO:0005634(nucleus);GO:0005643(nuclear pore);GO:0006351(transcription, DNA-templated);GO:0006355(regulation of transcription, DNA-templated);GO:0006952(defense response);GO:0009873(ethylene-activated signaling pathway);GO:0010087(phloem or xylem histogenesis);GO:0010200(response to chitin);GO:0045893(positive regulation…				AP2/ERF-ERF	PREDICTED: ethylene-responsive transcription factor 2-like [Pyrus x bretschneideri]	mrna	150.055	152.352	190.219	8.74059	14.6741	10.0157	14.7359	3.88126	1.8301e-115	1.8188e-113	up	yes
EVM0039030	EVM0039030		EVM0039030.1	GO:0003677(DNA binding);GO:0003700(DNA binding transcription factor activity);GO:0005515(protein binding);GO:0005634(nucleus);GO:0005737(cytoplasm);GO:0006351(transcription, DNA-templated);GO:0006355(regulation of transcription, DNA-templated);GO:0009736(cytokinin-activated signaling pathway);GO:0009873(ethylene-activated signaling pathway);GO:0048366(leaf development)	04626(Plant-pathogen interaction)	K13434		AP2/ERF-ERF	PREDICTED: ethylene-responsive transcription factor CRF4-like [Pyrus x bretschneideri]	mrna	1.12566	1.47969	1.00913	13.5777	13.4044	13.0208	0.0903554	-3.46825	3.15751e-87	1.7776e-85	down	yes
EVM0027198	EVM0027198		EVM0027198.1	GO:0003677(DNA binding);GO:0003700(DNA binding transcription factor activity);GO:0005634(nucleus);GO:0006351(transcription, DNA-templated);GO:0006355(regulation of transcription, DNA-templated);GO:0009873(ethylene-activated signaling pathway);GO:0045893(positive regulation of transcription, DNA-templated);GO:0048510(regulation of timing of transition from vegetative to reproductive phase)	03040(Spliceosome)	K12900		AP2/ERF-ERF	PREDICTED: ethylene-responsive transcription factor ABR1-like [Malus domestica]	mrna	5.90623	5.69237	7.72159	0.123907	0.127943	0.091904	56.2035	5.81259	1.81399e-84	9.67177e-83	up	yes
EVM0042297	EVM0042297		EVM0042297.1	GO:0000976(transcription regulatory region sequence-specific DNA binding);GO:0003677(DNA binding);GO:0003700(DNA binding transcription factor activity);GO:0005634(nucleus);GO:0006351(transcription, DNA-templated);GO:0006355(regulation of transcription, DNA-templated);GO:0009414(response to water deprivation);GO:0009873(ethylene-activated signaling pathway);GO:0019760(glucosinolate metabolic proce…				AP2/ERF-ERF	PREDICTED: ethylene-responsive transcription factor ERF106-like [Pyrus x bretschneideri]	mrna	19.7547	17.3254	22.5302	2.22042	3.06601	2.77773	7.39199	2.88596	1.04242e-68	3.92029e-67	up	yes
EVM0009686	EVM0009686		EVM0009686.1	GO:0003677(DNA binding);GO:0003700(DNA binding transcription factor activity);GO:0005634(nucleus);GO:0006351(transcription, DNA-templated);GO:0006355(regulation of transcription, DNA-templated);GO:0009873(ethylene-activated signaling pathway)				AP2/ERF-ERF	PREDICTED: ethylene-responsive transcription factor ERF060 [Pyrus x bretschneideri]	mrna	67.4176	94.8444	78.1077	17.9442	15.8046	14.8189	4.94918	2.30719	1.14519e-66	4.1078e-65	up	yes
EVM0023812	EVM0023812		EVM0023812.1	GO:0003700(DNA binding transcription factor activity);GO:0005634(nucleus);GO:0043565(sequence-specific DNA binding);GO:0044212(transcription regulatory region DNA binding);GO:0045893(positive regulation of transcription, DNA-templated)				AP2/ERF-ERF	dehydration responsive element binding protein [Pyrus x bretschneideri x Pyrus pyrifolia]	mrna	71.5245	55.8538	49.0954	10.7495	12.9805	12.8982	4.81797	2.26843	1.14374e-63	3.79574e-62	up	yes
EVM0006724	EVM0006724		EVM0006724.1	GO:0003677(DNA binding);GO:0003700(DNA binding transcription factor activity);GO:0005634(nucleus);GO:0006351(transcription, DNA-templated);GO:0006355(regulation of transcription, DNA-templated);GO:0009873(ethylene-activated signaling pathway);GO:0045893(positive regulation of transcription, DNA-templated);GO:0048510(regulation of timing of transition from vegetative to reproductive phase)	03040(Spliceosome)	K12900		AP2/ERF-ERF	PREDICTED: ethylene-responsive transcription factor ABR1-like [Pyrus x bretschneideri]	mrna	53.9462	64.9736	56.7481	0.285902	0.315703	0.068033	262.333	8.03525	2.75552e-63	9.04807e-62	up	yes
EVM0002847	EVM0002847		EVM0002847.1	GO:0003677(DNA binding);GO:0003700(DNA binding transcription factor activity);GO:0005515(protein binding);GO:0005634(nucleus);GO:0005737(cytoplasm);GO:0006351(transcription, DNA-templated);GO:0006355(regulation of transcription, DNA-templated);GO:0009736(cytokinin-activated signaling pathway);GO:0009873(ethylene-activated signaling pathway);GO:0048366(leaf development)	04626(Plant-pathogen interaction)	K13434		AP2/ERF-ERF	PREDICTED: pathogenesis-related genes transcriptional activator PTI6-like [Pyrus x bretschneideri]	mrna	30.0617	26.8063	27.7597	6.48169	6.91535	5.0561	4.58608	2.19726	1.19888e-48	2.65169e-47	up	yes
EVM0022686	EVM0022686		EVM0022686.1	GO:0003677(DNA binding);GO:0003700(DNA binding transcription factor activity);GO:0005622(intracellular);GO:0005634(nucleus);GO:0006351(transcription, DNA-templated);GO:0006355(regulation of transcription, DNA-templated);GO:0009414(response to water deprivation);GO:0009873(ethylene-activated signaling pathway);GO:0010143(cutin biosynthetic process);GO:0010166(wax metabolic process);GO:0043565(sequ…	04626(Plant-pathogen interaction)	K13434		AP2/ERF-ERF	PREDICTED: ethylene-responsive transcription factor WIN1-like [Pyrus x bretschneideri]	mrna	0.626026	0.981267	0.484021	11.5436	13.9048	12.3193	0.0553731	-4.17467	9.16022e-47	1.91578e-45	down	yes
EVM0034833	EVM0034833		EVM0034833.1	GO:0003677(DNA binding);GO:0003700(DNA binding transcription factor activity);GO:0005634(nucleus);GO:0006351(transcription, DNA-templated);GO:0006355(regulation of transcription, DNA-templated);GO:0009873(ethylene-activated signaling pathway)				AP2/ERF-ERF	PREDICTED: ethylene-responsive transcription factor ERF011 [Pyrus x bretschneideri]	mrna	18.8731	28.9372	30.4619	1.96304	1.94402	2.95143	11.4125	3.51254	1.46836e-43	2.76386e-42	up	yes
EVM0039888	EVM0039888		EVM0039888.1	GO:0003677(DNA binding);GO:0003700(DNA binding transcription factor activity);GO:0005634(nucleus);GO:0006351(transcription, DNA-templated);GO:0006355(regulation of transcription, DNA-templated);GO:0009873(ethylene-activated signaling pathway)				AP2/ERF-ERF	PREDICTED: ethylene-responsive transcription factor ERF023-like [Pyrus x bretschneideri]	mrna	6.4268	5.71961	6.36057	31.2582	26.1707	30.222	0.211144	-2.2437	1.37227e-42	2.50333e-41	down	yes
EVM0042414	EVM0042414		EVM0042414.1	GO:0003677(DNA binding);GO:0003700(DNA binding transcription factor activity);GO:0005622(intracellular);GO:0005634(nucleus);GO:0006351(transcription, DNA-templated);GO:0006355(regulation of transcription, DNA-templated);GO:0006952(defense response);GO:0009867(jasmonic acid mediated signaling pathway);GO:0009873(ethylene-activated signaling pathway)	04016(MAPK signaling pathway - plant);04075(Plant hormone signal transduction)	K14516		AP2/ERF-ERF	PREDICTED: ethylene-responsive transcription factor 1B-like [Pyrus x bretschneideri]	mrna	21.7061	19.4186	18.2018	3.70448	5.23587	5.11776	4.22009	2.07727	1.98568e-38	3.15718e-37	up	yes
EVM0026768	EVM0026768		EVM0026768.1	GO:0003677(DNA binding);GO:0003700(DNA binding transcription factor activity);GO:0005515(protein binding);GO:0005634(nucleus);GO:0005737(cytoplasm);GO:0006351(transcription, DNA-templated);GO:0006355(regulation of transcription, DNA-templated);GO:0009736(cytokinin-activated signaling pathway);GO:0009873(ethylene-activated signaling pathway);GO:0048366(leaf development)	04626(Plant-pathogen interaction)	K13434		AP2/ERF-ERF	hypothetical protein DVH24_041775 [Malus domestica]	mrna	14.5544	10.6875	14.403	4.06402	3.89594	3.95664	3.32686	1.73416	1.30705e-32	1.70861e-31	up	yes
EVM0034047	EVM0034047		EVM0034047.1	GO:0003677(DNA binding);GO:0003700(DNA binding transcription factor activity);GO:0005515(protein binding);GO:0005634(nucleus);GO:0006351(transcription, DNA-templated);GO:0006355(regulation of transcription, DNA-templated);GO:0006952(defense response);GO:0009873(ethylene-activated signaling pathway);GO:0010105(negative regulation of ethylene-activated signaling pathway);GO:0043565(sequence-specifi…				AP2/ERF-ERF	ethylene-responsive transcription factor 3-like [Malus domestica]	mrna	49.0584	55.6217	50.5253	24.5606	26.302	24.8675	2.04945	1.03524	2.21318e-29	2.53016e-28	up	yes
EVM0025937	EVM0025937		EVM0025937.1	GO:0003677(DNA binding);GO:0003700(DNA binding transcription factor activity);GO:0005515(protein binding);GO:0005634(nucleus);GO:0006351(transcription, DNA-templated);GO:0006355(regulation of transcription, DNA-templated);GO:0009409(response to cold);GO:0009414(response to water deprivation);GO:0009631(cold acclimation)				AP2/ERF-ERF	PREDICTED: dehydration-responsive element-binding protein 1A-like [Pyrus x bretschneideri]	mrna	2.04613	2.71994	2.09661	10.7921	16.4054	16.3041	0.157757	-2.66422	4.00575e-27	4.18884e-26	down	yes
EVM0020262	EVM0020262		EVM0020262.1	GO:0003677(DNA binding);GO:0003700(DNA binding transcription factor activity);GO:0005634(nucleus);GO:0005643(nuclear pore);GO:0006351(transcription, DNA-templated);GO:0006355(regulation of transcription, DNA-templated);GO:0006952(defense response);GO:0009873(ethylene-activated signaling pathway);GO:0010087(phloem or xylem histogenesis);GO:0010200(response to chitin);GO:0045893(positive regulation…				AP2/ERF-ERF	PREDICTED: ethylene-responsive transcription factor 2-like [Pyrus x bretschneideri]	mrna	75.8661	66.4516	77.0958	18.6488	30.3072	24.4218	2.99019	1.58024	2.3426e-26	2.3673e-25	up	yes
EVM0030611	EVM0030611		EVM0030611.1	GO:0003677(DNA binding);GO:0003700(DNA binding transcription factor activity);GO:0005515(protein binding);GO:0005634(nucleus);GO:0005737(cytoplasm);GO:0006351(transcription, DNA-templated);GO:0006355(regulation of transcription, DNA-templated);GO:0009736(cytokinin-activated signaling pathway);GO:0009873(ethylene-activated signaling pathway);GO:0048366(leaf development)	04626(Plant-pathogen interaction)	K13434		AP2/ERF-ERF	PREDICTED: ethylene-responsive transcription factor CRF4-like [Pyrus x bretschneideri]	mrna	1.8061	2.82338	1.5763	10.6345	11.3427	10.5762	0.190634	-2.39112	6.7513e-26	6.71688e-25	down	yes
EVM0041322	EVM0041322		EVM0041322.1	GO:0000976(transcription regulatory region sequence-specific DNA binding);GO:0003677(DNA binding);GO:0003700(DNA binding transcription factor activity);GO:0005634(nucleus);GO:0006351(transcription, DNA-templated);GO:0006355(regulation of transcription, DNA-templated);GO:0009414(response to water deprivation);GO:0009873(ethylene-activated signaling pathway);GO:0019760(glucosinolate metabolic proce…				AP2/ERF-ERF	PREDICTED: ethylene-responsive transcription factor ERF107-like [Pyrus x bretschneideri]	mrna	14.9626	18.3574	24.7228	2.27998	2.55836	4.66522	6.10748	2.61058	3.50906e-24	3.22275e-23	up	yes
EVM0019470	EVM0019470		EVM0019470.1	GO:0003677(DNA binding);GO:0003700(DNA binding transcription factor activity);GO:0005634(nucleus);GO:0006351(transcription, DNA-templated);GO:0006355(regulation of transcription, DNA-templated);GO:0006970(response to osmotic stress);GO:0009737(response to abscisic acid);GO:0009738(abscisic acid-activated signaling pathway);GO:0009749(response to glucose);GO:0009788(negative regulation of abscisic…	03040(Spliceosome)	K12900		AP2/ERF-ERF	PREDICTED: ethylene-responsive transcription factor ABR1-like [Pyrus x bretschneideri]	mrna	2.70831	5.4036	3.66898	0.321311	0.350163	0.372685	11.2827	3.49604	1.01136e-23	9.07073e-23	up	yes
EVM0024974	EVM0024974		EVM0024974.1	GO:0003677(DNA binding);GO:0003700(DNA binding transcription factor activity);GO:0005515(protein binding);GO:0005634(nucleus);GO:0006351(transcription, DNA-templated);GO:0006355(regulation of transcription, DNA-templated);GO:0007275(multicellular organism development);GO:0009873(ethylene-activated signaling pathway);GO:0043565(sequence-specific DNA binding);GO:0050832(defense response to fungus)	03040(Spliceosome)	K12900		AP2/ERF-ERF	PREDICTED: ethylene-responsive transcription factor ERF113-like [Pyrus x bretschneideri]	mrna	8.91972	12.1977	8.82579	3.33666	3.07919	2.48721	3.36325	1.74986	1.56085e-21	1.25722e-20	up	yes
EVM0012092	EVM0012092		EVM0012092.1	GO:0003677(DNA binding);GO:0003700(DNA binding transcription factor activity);GO:0005634(nucleus);GO:0005643(nuclear pore);GO:0006351(transcription, DNA-templated);GO:0006355(regulation of transcription, DNA-templated);GO:0006952(defense response);GO:0009873(ethylene-activated signaling pathway);GO:0010087(phloem or xylem histogenesis);GO:0010200(response to chitin);GO:0045893(positive regulation…				AP2/ERF-ERF	PREDICTED: ethylene-responsive transcription factor 1-like isoform X2 [Pyrus x bretschneideri]	mrna	0.594851	0.826664	0.418585	3.95394	4.00978	4.39702	0.148866	-2.74791	1.45928e-19	1.0687e-18	down	yes
EVM0007653	EVM0007653		EVM0007653.1	GO:0003677(DNA binding);GO:0003700(DNA binding transcription factor activity);GO:0005634(nucleus);GO:0005643(nuclear pore);GO:0006351(transcription, DNA-templated);GO:0006355(regulation of transcription, DNA-templated);GO:0006952(defense response);GO:0009873(ethylene-activated signaling pathway);GO:0010087(phloem or xylem histogenesis);GO:0010200(response to chitin);GO:0045893(positive regulation…				AP2/ERF-ERF	PREDICTED: ethylene-responsive transcription factor 1-like [Pyrus x bretschneideri]	mrna	2.59643	1.80472	4.00409	0.107527	0.190706	0.145399	18.9464	4.24385	7.80071e-19	5.49678e-18	up	yes
EVM0031649	EVM0031649		EVM0031649.1	GO:0003677(DNA binding);GO:0003700(DNA binding transcription factor activity);GO:0005634(nucleus);GO:0005643(nuclear pore);GO:0006351(transcription, DNA-templated);GO:0006355(regulation of transcription, DNA-templated);GO:0006952(defense response);GO:0009873(ethylene-activated signaling pathway);GO:0010087(phloem or xylem histogenesis);GO:0010200(response to chitin);GO:0045893(positive regulation…	04626(Plant-pathogen interaction)	K13433		AP2/ERF-ERF	PREDICTED: pathogenesis-related genes transcriptional activator PTI5-like [Pyrus x bretschneideri]	mrna	3.07161	2.54915	4.24829	0.186616	0.25216	0.320428	12.9992	3.70035	2.35028e-17	1.51518e-16	up	yes
EVM0016813	EVM0016813		EVM0016813.1	GO:0003677(DNA binding);GO:0003700(DNA binding transcription factor activity);GO:0005634(nucleus);GO:0006351(transcription, DNA-templated);GO:0006355(regulation of transcription, DNA-templated);GO:0009873(ethylene-activated signaling pathway);GO:0044212(transcription regulatory region DNA binding)				AP2/ERF-ERF	hypothetical protein DVH24_025886 [Malus domestica]	mrna	1.01815	0.872663	0.743191	3.62352	4.45211	5.68957	0.191353	-2.38569	1.06333e-16	6.59386e-16	down	yes
EVM0024172	EVM0024172		EVM0024172.1	GO:0003677(DNA binding);GO:0003700(DNA binding transcription factor activity);GO:0005634(nucleus);GO:0006351(transcription, DNA-templated);GO:0006355(regulation of transcription, DNA-templated);GO:0009873(ethylene-activated signaling pathway)				AP2/ERF-ERF	PREDICTED: ethylene-responsive transcription factor ERF023-like [Malus domestica]	mrna	2.81482	2.60582	2.60673	8.54226	8.80859	10.3869	0.289402	-1.78885	1.08006e-15	6.31912e-15	down	yes
EVM0030361	EVM0030361		EVM0030361.1	GO:0003677(DNA binding);GO:0003700(DNA binding transcription factor activity);GO:0005634(nucleus);GO:0006351(transcription, DNA-templated);GO:0006355(regulation of transcription, DNA-templated);GO:0009873(ethylene-activated signaling pathway)				AP2/ERF-ERF	PREDICTED: ethylene-responsive transcription factor ERF023-like [Malus domestica]	mrna	3.08864	3.00094	3.036	10.1651	10.9275	12.4986	0.271666	-1.8801	1.37773e-15	8.00667e-15	down	yes
EVM0033157	EVM0033157		EVM0033157.1	GO:0003677(DNA binding);GO:0003700(DNA binding transcription factor activity);GO:0005515(protein binding);GO:0005634(nucleus);GO:0005737(cytoplasm);GO:0005886(plasma membrane);GO:0006351(transcription, DNA-templated);GO:0006355(regulation of transcription, DNA-templated);GO:0008219(cell death);GO:0009723(response to ethylene);GO:0009735(response to cytokinin);GO:0009753(response to jasmonic acid)…				AP2/ERF-ERF	ethylene response factor 2 [Pyrus x bretschneideri]	mrna	23.6636	27.7324	32.5078	9.04434	14.0637	10.5707	2.49129	1.31689	2.49675e-15	1.42586e-14	up	yes
EVM0018807	EVM0018807		EVM0018807.1	GO:0003677(DNA binding);GO:0003700(DNA binding transcription factor activity);GO:0005622(intracellular);GO:0005634(nucleus);GO:0006351(transcription, DNA-templated);GO:0006355(regulation of transcription, DNA-templated);GO:0009414(response to water deprivation);GO:0009873(ethylene-activated signaling pathway);GO:0010143(cutin biosynthetic process);GO:0010166(wax metabolic process);GO:0043565(sequ…				AP2/ERF-ERF	PREDICTED: ethylene-responsive transcription factor WIN1-like [Pyrus x bretschneideri]	mrna	1.60077	1.18342	1.56339	5.43428	6.82472	7.40787	0.221061	-2.17748	3.41222e-15	1.93297e-14	down	yes
EVM0041959	EVM0041959		EVM0041959.1	GO:0005515(protein binding)				AP2/ERF-ERF	PREDICTED: TMV resistance protein N-like isoform X1 [Pyrus x bretschneideri]	mrna	15.908	17.7802	21.9148	9.21142	7.98344	8.75104	2.14303	1.09965	5.34417e-15	2.99102e-14	up	yes
EVM0004598	EVM0004598		EVM0004598.1	GO:0003677(DNA binding);GO:0003700(DNA binding transcription factor activity);GO:0005634(nucleus);GO:0006351(transcription, DNA-templated);GO:0006355(regulation of transcription, DNA-templated);GO:0007275(multicellular organism development);GO:0009873(ethylene-activated signaling pathway);GO:1905392(plant organ morphogenesis)				AP2/ERF-ERF	PREDICTED: AP2-like ethylene-responsive transcription factor ANT [Malus domestica]	mrna	1.11702	1.8295	1.58612	6.32151	4.7014	7.83535	0.240353	-2.05677	1.57135e-13	7.96122e-13	down	yes
EVM0025859	EVM0025859		EVM0025859.1	GO:0003677(DNA binding);GO:0003700(DNA binding transcription factor activity);GO:0005622(intracellular);GO:0005634(nucleus);GO:0006351(transcription, DNA-templated);GO:0006355(regulation of transcription, DNA-templated);GO:0006952(defense response);GO:0009867(jasmonic acid mediated signaling pathway);GO:0009873(ethylene-activated signaling pathway)	04016(MAPK signaling pathway - plant);04075(Plant hormone signal transduction)	K14516		AP2/ERF-ERF	PREDICTED: ethylene-responsive transcription factor 1B-like [Pyrus x bretschneideri]	mrna	13.0919	14.7227	17.602	1.18687	0.234588	0.229188	27.5145	4.78212	2.09825e-11	9.14082e-11	up	yes
EVM0026336	EVM0026336		EVM0026336.1	GO:0003677(DNA binding);GO:0003700(DNA binding transcription factor activity);GO:0005634(nucleus);GO:0006351(transcription, DNA-templated);GO:0006355(regulation of transcription, DNA-templated);GO:0009873(ethylene-activated signaling pathway);GO:0043565(sequence-specific DNA binding);GO:0045893(positive regulation of transcription, DNA-templated)				AP2/ERF-ERF	PREDICTED: ethylene-responsive transcription factor TINY-like [Malus domestica]	mrna	2.93293	7.59364	4.40087	15.8857	24.3776	20.7654	0.244597	-2.03152	2.94047e-11	1.26794e-10	down	yes
EVM0028934	EVM0028934		EVM0028934.1	GO:0003677(DNA binding);GO:0003700(DNA binding transcription factor activity);GO:0005634(nucleus);GO:0006351(transcription, DNA-templated);GO:0006355(regulation of transcription, DNA-templated);GO:0009873(ethylene-activated signaling pathway);GO:0043565(sequence-specific DNA binding);GO:0045893(positive regulation of transcription, DNA-templated)				AP2/ERF-ERF	PREDICTED: ethylene-responsive transcription factor TINY [Pyrus x bretschneideri]	mrna	3.84001	5.96731	3.45831	12.086	17.5165	13.983	0.304359	-1.71615	1.38428e-10	5.64326e-10	down	yes
EVM0036433	EVM0036433		EVM0036433.1	GO:0003677(DNA binding);GO:0003700(DNA binding transcription factor activity);GO:0005622(intracellular);GO:0005634(nucleus);GO:0006351(transcription, DNA-templated);GO:0006355(regulation of transcription, DNA-templated);GO:0006952(defense response);GO:0009409(response to cold);GO:0009873(ethylene-activated signaling pathway);GO:0010200(response to chitin);GO:0043565(sequence-specific DNA binding)…				AP2/ERF-ERF	hypothetical protein DVH24_035866 [Malus domestica]	mrna	2.96327	2.38569	1.75198	6.44536	8.6301	6.61127	0.327432	-1.61073	6.78203e-10	2.60604e-09	down	yes
EVM0019598	EVM0019598		EVM0019598.1	GO:0003677(DNA binding);GO:0003700(DNA binding transcription factor activity);GO:0005622(intracellular);GO:0005634(nucleus);GO:0006351(transcription, DNA-templated);GO:0006355(regulation of transcription, DNA-templated);GO:0009873(ethylene-activated signaling pathway);GO:0010200(response to chitin)				AP2/ERF-ERF	PREDICTED: ethylene-responsive transcription factor ERF098-like [Pyrus x bretschneideri]	mrna	1.36307	1.78544	1.34139	0	0	0	14966.3	13.8694	5.31552e-09	1.88778e-08	up	yes
EVM0031850	EVM0031850		EVM0031850.1	GO:0003677(DNA binding);GO:0003700(DNA binding transcription factor activity);GO:0005515(protein binding);GO:0005634(nucleus);GO:0005737(cytoplasm);GO:0006351(transcription, DNA-templated);GO:0006355(regulation of transcription, DNA-templated);GO:0009736(cytokinin-activated signaling pathway);GO:0009793(embryo development ending in seed dormancy);GO:0009873(ethylene-activated signaling pathway);G…	04626(Plant-pathogen interaction)	K13434		AP2/ERF-ERF	PREDICTED: ethylene-responsive transcription factor CRF4 [Pyrus x bretschneideri]	mrna	0.429681	0.627718	0.439192	2.38007	2.21587	2.72267	0.204491	-2.28989	9.21504e-09	3.20907e-08	down	yes
EVM0032821	EVM0032821		EVM0032821.1	GO:0003677(DNA binding);GO:0003700(DNA binding transcription factor activity);GO:0005634(nucleus);GO:0006351(transcription, DNA-templated);GO:0006355(regulation of transcription, DNA-templated);GO:0009873(ethylene-activated signaling pathway)	04626(Plant-pathogen interaction)	K13434		AP2/ERF-ERF	PREDICTED: ethylene-responsive transcription factor ERF118-like [Pyrus x bretschneideri]	mrna	2.19236	2.04158	3.71253	9.21548	7.42077	8.03258	0.322126	-1.6343	2.05116e-08	6.93124e-08	down	yes
EVM0041970	EVM0041970		EVM0041970.1	GO:0003677(DNA binding);GO:0003700(DNA binding transcription factor activity);GO:0005622(intracellular);GO:0005634(nucleus);GO:0006351(transcription, DNA-templated);GO:0006355(regulation of transcription, DNA-templated);GO:0006952(defense response);GO:0009873(ethylene-activated signaling pathway);GO:0016020(membrane);GO:0019760(glucosinolate metabolic process);GO:0043565(sequence-specific DNA bin…				AP2/ERF-ERF	PREDICTED: TMV resistance protein N-like isoform X1 [Pyrus x bretschneideri]	mrna	0.456486	0.386901	0.513362	3.39291	3.27293	2.37134	0.150129	-2.73572	4.49419e-08	1.47079e-07	down	yes
EVM0019607	EVM0019607		EVM0019607.1	GO:0003677(DNA binding);GO:0003700(DNA binding transcription factor activity);GO:0005634(nucleus);GO:0006351(transcription, DNA-templated);GO:0006355(regulation of transcription, DNA-templated);GO:0009414(response to water deprivation);GO:0009651(response to salt stress);GO:0009723(response to ethylene);GO:0009737(response to abscisic acid);GO:0009751(response to salicylic acid);GO:0009753(respon…	03040(Spliceosome)	K12900		AP2/ERF-ERF	PREDICTED: ethylene-responsive transcription factor ERF113-like isoform X1 [Pyrus x bretschneideri]	mrna	5.38649	11.4169	5.0543	2.55171	2.00289	1.07335	3.88378	1.95746	5.96123e-08	1.92889e-07	up	yes
EVM0004047	EVM0004047		EVM0004047.1	GO:0003677(DNA binding);GO:0003700(DNA binding transcription factor activity);GO:0005634(nucleus);GO:0006351(transcription, DNA-templated);GO:0006355(regulation of transcription, DNA-templated);GO:0009873(ethylene-activated signaling pathway);GO:0010200(response to chitin)				AP2/ERF-ERF	hypothetical protein DVH24_008229 [Malus domestica]	mrna	0.745686	0.744602	1.29221	3.34897	3.34006	3.468	0.273948	-1.86802	3.08959e-07	9.37593e-07	down	yes
EVM0032312	EVM0032312		EVM0032312.1	GO:0003677(DNA binding);GO:0003700(DNA binding transcription factor activity);GO:0005515(protein binding);GO:0005634(nucleus);GO:0005737(cytoplasm);GO:0006351(transcription, DNA-templated);GO:0006355(regulation of transcription, DNA-templated);GO:0009736(cytokinin-activated signaling pathway);GO:0009793(embryo development ending in seed dormancy);GO:0009873(ethylene-activated signaling pathway);G…	04626(Plant-pathogen interaction)	K13434		AP2/ERF-ERF	PREDICTED: ethylene-responsive transcription factor CRF4 [Pyrus x bretschneideri]	mrna	0.347331	0.450128	0.521088	1.74175	2.27167	2.01676	0.218658	-2.19325	3.75627e-07	1.13098e-06	down	yes
EVM0018714	EVM0018714		EVM0018714.1	GO:0003677(DNA binding);GO:0003700(DNA binding transcription factor activity);GO:0005634(nucleus);GO:0006351(transcription, DNA-templated);GO:0006355(regulation of transcription, DNA-templated);GO:0009873(ethylene-activated signaling pathway);GO:0010200(response to chitin)				AP2/ERF-ERF	PREDICTED: ethylene-responsive transcription factor ERF019-like [Pyrus x bretschneideri]	mrna	7.04627	5.79924	5.7081	1.07162	2.07233	2.61802	3.22001	1.68707	4.2439e-07	1.27245e-06	up	yes
EVM0032582	EVM0032582		EVM0032582.1	GO:0003677(DNA binding);GO:0003700(DNA binding transcription factor activity);GO:0005634(nucleus);GO:0006351(transcription, DNA-templated);GO:0006355(regulation of transcription, DNA-templated);GO:0009873(ethylene-activated signaling pathway);GO:0019760(glucosinolate metabolic process);GO:0043565(sequence-specific DNA binding);GO:0044212(transcription regulatory region DNA binding);GO:0045893(pos…				AP2/ERF-ERF	PREDICTED: ethylene-responsive transcription factor ERF027-like [Pyrus x bretschneideri]	mrna	11.4921	20.7872	12.7445	0.349878	1.84805	2.01086	10.6976	3.41921	6.81853e-07	2.00505e-06	up	yes
EVM0020950	EVM0020950		EVM0020950.1	GO:0003677(DNA binding);GO:0003700(DNA binding transcription factor activity);GO:0005634(nucleus);GO:0006351(transcription, DNA-templated);GO:0006355(regulation of transcription, DNA-templated);GO:0007275(multicellular organism development);GO:0009873(ethylene-activated signaling pathway)				AP2/ERF-ERF	PREDICTED: ethylene-responsive transcription factor ERF039-like [Pyrus x bretschneideri]	mrna	5.42358	4.31107	4.83188	2.06345	2.38774	2.74662	2.02374	1.01703	3.73403e-06	1.01996e-05	up	yes
EVM0015522	EVM0015522		EVM0015522.1	GO:0003677(DNA binding);GO:0003700(DNA binding transcription factor activity);GO:0005622(intracellular);GO:0005634(nucleus);GO:0006351(transcription, DNA-templated);GO:0006355(regulation of transcription, DNA-templated);GO:0009873(ethylene-activated signaling pathway)				AP2/ERF-ERF	PREDICTED: ethylene-responsive transcription factor ERF003 [Malus domestica]	mrna	1.19374	1.84212	1.16254	5.29653	3.88905	4.78705	0.300472	-1.7347	9.24543e-06	2.42142e-05	down	yes
EVM0028574	EVM0028574		EVM0028574.1	GO:0003677(DNA binding);GO:0003700(DNA binding transcription factor activity);GO:0005634(nucleus);GO:0006351(transcription, DNA-templated);GO:0006355(regulation of transcription, DNA-templated);GO:0009873(ethylene-activated signaling pathway);GO:0043565(sequence-specific DNA binding);GO:0045893(positive regulation of transcription, DNA-templated)				AP2/ERF-ERF	PREDICTED: ethylene-responsive transcription factor TINY-like [Pyrus x bretschneideri]	mrna	0.751481	0.483664	0.491413	1.65803	3.03024	2.80531	0.230405	-2.11776	1.17354e-05	3.04108e-05	down	yes
EVM0006541	EVM0006541		EVM0006541.1	GO:0003677(DNA binding);GO:0003700(DNA binding transcription factor activity);GO:0005634(nucleus);GO:0006351(transcription, DNA-templated);GO:0006355(regulation of transcription, DNA-templated);GO:0007275(multicellular organism development);GO:0009873(ethylene-activated signaling pathway)				AP2/ERF-ERF	PREDICTED: ethylene-responsive transcription factor ERF039-like [Pyrus x bretschneideri]	mrna	2.15939	4.49577	2.36449	7.6728	8.12144	7.38619	0.389106	-1.36176	1.21377e-05	3.14009e-05	down	yes
EVM0040556	EVM0040556		EVM0040556.1	GO:0003677(DNA binding);GO:0003700(DNA binding transcription factor activity);GO:0005634(nucleus);GO:0006351(transcription, DNA-templated);GO:0006355(regulation of transcription, DNA-templated);GO:0009873(ethylene-activated signaling pathway);GO:0010200(response to chitin)				AP2/ERF-ERF	hypothetical protein DVH24_040088 [Malus domestica]	mrna	0.816848	1.129	1.62189	3.21792	3.37748	4.29961	0.327465	-1.61059	1.50734e-05	3.85541e-05	down	yes
EVM0000880	EVM0000880		EVM0000880.1	GO:0003677(DNA binding);GO:0003700(DNA binding transcription factor activity);GO:0005634(nucleus);GO:0006351(transcription, DNA-templated);GO:0006355(regulation of transcription, DNA-templated);GO:0009873(ethylene-activated signaling pathway);GO:0010087(phloem or xylem histogenesis);GO:0010200(response to chitin);GO:0050832(defense response to fungus);GO:0051301(cell division)				AP2/ERF-ERF	PREDICTED: ethylene-responsive transcription factor ERF109-like [Pyrus x bretschneideri]	mrna	41.1172	36.3757	20.0143	64.2733	103.17	93.2135	0.374082	-1.41857	0.000163657	0.000370583	down	yes
EVM0008850	EVM0008850		EVM0008850.1	GO:0003677(DNA binding);GO:0003700(DNA binding transcription factor activity);GO:0005622(intracellular);GO:0005634(nucleus);GO:0006351(transcription, DNA-templated);GO:0006355(regulation of transcription, DNA-templated);GO:0009414(response to water deprivation);GO:0009873(ethylene-activated signaling pathway);GO:0010143(cutin biosynthetic process);GO:0010166(wax metabolic process);GO:0043565(sequ…	04626(Plant-pathogen interaction)	K13434		AP2/ERF-ERF	PREDICTED: ethylene-responsive transcription factor WIN1-like [Pyrus x bretschneideri]	mrna	0.110248	0.067867	0.094702	1.19667	0.516489	1.07716	0.0977725	-3.35443	0.000301114	0.000660131	down	yes
EVM0040563	EVM0040563		EVM0040563.1	GO:0003677(DNA binding);GO:0003700(DNA binding transcription factor activity);GO:0005515(protein binding);GO:0005634(nucleus);GO:0006351(transcription, DNA-templated);GO:0006355(regulation of transcription, DNA-templated);GO:0007275(multicellular organism development);GO:0009873(ethylene-activated signaling pathway);GO:0043565(sequence-specific DNA binding);GO:0050832(defense response to fungus)	03040(Spliceosome)	K12900		AP2/ERF-ERF	PREDICTED: ethylene-responsive transcription factor ERF113-like [Pyrus x bretschneideri]	mrna	0.054392	0	0.078606	0.417414	0.890654	0.602118	0.0696257	-3.84424	0.000320105	0.00069942	down	yes
EVM0039977	EVM0039977		EVM0039977.1	GO:0003677(DNA binding);GO:0003700(DNA binding transcription factor activity);GO:0005634(nucleus);GO:0006351(transcription, DNA-templated);GO:0006355(regulation of transcription, DNA-templated);GO:0009873(ethylene-activated signaling pathway)	04626(Plant-pathogen interaction)	K13434		AP2/ERF-ERF	PREDICTED: ethylene-responsive transcription factor CRF6-like [Pyrus x bretschneideri]	mrna	1.1578	1.88938	2.02809	4.0031	4.38112	3.48424	0.427627	-1.22558	0.000331055	0.000721695	down	yes
EVM0020992	EVM0020992		EVM0020992.1	GO:0003677(DNA binding);GO:0003700(DNA binding transcription factor activity);GO:0005622(intracellular);GO:0005634(nucleus);GO:0006351(transcription, DNA-templated);GO:0006355(regulation of transcription, DNA-templated);GO:0006952(defense response);GO:0009873(ethylene-activated signaling pathway);GO:0010200(response to chitin);GO:0043565(sequence-specific DNA binding)				AP2/ERF-ERF	PREDICTED: ethylene-responsive transcription factor 2-like [Pyrus x bretschneideri]	mrna	5.38052	1.62836	1.34464	12.6473	14.9019	14.6832	0.197798	-2.3379	0.00040044	0.000863808	down	yes
EVM0026415	EVM0026415		EVM0026415.1	GO:0003677(DNA binding);GO:0003700(DNA binding transcription factor activity);GO:0005622(intracellular);GO:0005634(nucleus);GO:0006351(transcription, DNA-templated);GO:0006355(regulation of transcription, DNA-templated);GO:0009873(ethylene-activated signaling pathway)				AP2/ERF-ERF	PREDICTED: ethylene-responsive transcription factor LEP-like [Pyrus x bretschneideri]	mrna	0	0	0	0.295132	0.368967	0.170673	0.00035938	-11.4422	0.000430833	0.000925405	down	yes
EVM0030574	EVM0030574		EVM0030574.1	GO:0003677(DNA binding);GO:0003700(DNA binding transcription factor activity);GO:0005622(intracellular);GO:0005634(nucleus);GO:0006351(transcription, DNA-templated);GO:0006355(regulation of transcription, DNA-templated);GO:0006952(defense response);GO:0009867(jasmonic acid mediated signaling pathway);GO:0009873(ethylene-activated signaling pathway)	04016(MAPK signaling pathway - plant);04075(Plant hormone signal transduction)	K14516		AP2/ERF-ERF	PREDICTED: ethylene-responsive transcription factor 1B-like [Pyrus x bretschneideri]	mrna	1.37631	1.36274	1.02257	0.264215	0.194781	0.512491	3.87202	1.95309	0.000476279	0.00101692	up	yes
EVM0004726	EVM0004726		EVM0004726.1	GO:0000302(response to reactive oxygen species);GO:0003677(DNA binding);GO:0003700(DNA binding transcription factor activity);GO:0005634(nucleus);GO:0006351(transcription, DNA-templated);GO:0006355(regulation of transcription, DNA-templated);GO:0009723(response to ethylene);GO:0009873(ethylene-activated signaling pathway);GO:0035865(cellular response to potassium ion);GO:0043565(sequence-specific…	00010(Glycolysis / Gluconeogenesis);03018(RNA degradation)	K01689	EC:4.2.1.11	AP2/ERF-ERF	PREDICTED: ethylene-responsive transcription factor ERF098-like [Pyrus x bretschneideri]	mrna	0.264124	0.236514	0.220193	0	0	0	2402.77	11.2305	0.000998765	0.00204163	up	yes
EVM0001267	EVM0001267		EVM0001267.1	GO:0003700(DNA binding transcription factor activity);GO:0005634(nucleus);GO:0043565(sequence-specific DNA binding);GO:0044212(transcription regulatory region DNA binding);GO:0045893(positive regulation of transcription, DNA-templated)				AP2/ERF-ERF	PREDICTED: dehydration-responsive element-binding protein 2D-like [Malus domestica]	mrna	1.08453	0.897647	1.11435	0.362655	0.149001	0.335211	3.65645	1.87044	0.00105347	0.00214545	up	yes
EVM0006943	EVM0006943		EVM0006943.1	GO:0003677(DNA binding);GO:0003700(DNA binding transcription factor activity);GO:0005515(protein binding);GO:0005634(nucleus);GO:0006351(transcription, DNA-templated);GO:0009409(response to cold);GO:0009414(response to water deprivation);GO:0009631(cold acclimation);GO:0045893(positive regulation of transcription, DNA-templated)				AP2/ERF-ERF	PREDICTED: dehydration-responsive element-binding protein 1B-like [Pyrus x bretschneideri]	mrna	0.04859	0	0	0.030729	1.54978	0.517101	0.0231644	-5.43195	0.00119779	0.0024215	down	yes
EVM0038367	EVM0038367		EVM0038367.1	GO:0003677(DNA binding);GO:0003700(DNA binding transcription factor activity);GO:0005634(nucleus);GO:0006351(transcription, DNA-templated);GO:0006355(regulation of transcription, DNA-templated);GO:0009873(ethylene-activated signaling pathway)				AP2/ERF-ERF	PREDICTED: ethylene-responsive transcription factor ERF021-like [Pyrus x bretschneideri]	mrna	0.51803	0.79651	0.3636	0	0.106666	0	15.7327	3.97569	0.00262489	0.00505174	up	yes
EVM0018391	EVM0018391		EVM0018391.1	GO:0003677(DNA binding);GO:0003700(DNA binding transcription factor activity);GO:0005634(nucleus);GO:0006351(transcription, DNA-templated);GO:0006355(regulation of transcription, DNA-templated)				AP2/ERF-ERF	PREDICTED: ethylene-responsive transcription factor ERF015 [Pyrus x bretschneideri]	mrna	0.526433	0.62261	1.90163	0.2519	0.234992	0.157703	4.73269	2.24266	0.00342024	0.00647346	up	yes
EVM0002630	EVM0002630		EVM0002630.1	GO:0003677(DNA binding);GO:0003700(DNA binding transcription factor activity);GO:0005634(nucleus);GO:0006351(transcription, DNA-templated);GO:0006355(regulation of transcription, DNA-templated);GO:0009873(ethylene-activated signaling pathway);GO:0010087(phloem or xylem histogenesis);GO:0010200(response to chitin);GO:0050832(defense response to fungus);GO:0051301(cell division)	03040(Spliceosome)	K12900		AP2/ERF-ERF	PREDICTED: ethylene-responsive transcription factor ERF109-like [Pyrus x bretschneideri]	mrna	0.547197	0.500379	0.634528	0	0.15525	0	10.8348	3.4376	0.00534023	0.00978876	up	yes
EVM0015829	EVM0015829		EVM0015829.1	GO:0003677(DNA binding);GO:0003700(DNA binding transcription factor activity);GO:0005634(nucleus);GO:0006351(transcription, DNA-templated);GO:0006355(regulation of transcription, DNA-templated);GO:0006970(response to osmotic stress);GO:0009737(response to abscisic acid);GO:0009738(abscisic acid-activated signaling pathway);GO:0009749(response to glucose);GO:0009788(negative regulation of abscisic…	03040(Spliceosome)	K12900		AP2/ERF-ERF	PREDICTED: ethylene-responsive transcription factor ABR1-like [Pyrus x bretschneideri]	mrna	0.069964	1.04266	0.515704	0.090117	0.151992	0.062155	5.35168	2.41999	0.00600269	0.010898	up	yes
EVM0002729	EVM0002729		EVM0002729.1	GO:0003677(DNA binding);GO:0003700(DNA binding transcription factor activity);GO:0005622(intracellular);GO:0005634(nucleus);GO:0006351(transcription, DNA-templated);GO:0006355(regulation of transcription, DNA-templated);GO:0006952(defense response);GO:0009873(ethylene-activated signaling pathway);GO:0010200(response to chitin);GO:0043565(sequence-specific DNA binding)	04075(Plant hormone signal transduction)	K14517		AP2/ERF-ERF	PREDICTED: ethylene-responsive transcription factor 2-like [Pyrus x bretschneideri]	mrna	1.40101	0.327035	0.088128	0.107527	0	0.123472	7.86224	2.97494	0.0149925	0.0253059	up	yes
EVM0013308	EVM0013308		EVM0013308.1	GO:0003700(DNA binding transcription factor activity);GO:0005634(nucleus);GO:0043565(sequence-specific DNA binding);GO:0044212(transcription regulatory region DNA binding);GO:0045893(positive regulation of transcription, DNA-templated)				AP2/ERF-ERF	PREDICTED: ethylene-responsive transcription factor ABI4-like [Malus domestica]	mrna	0	0.054573	0	0.182163	0.22413	0.27066	0.0806156	-3.6328	0.0226586	0.0370217	down	yes
EVM0042386	EVM0042386		EVM0042386.1	GO:0003677(DNA binding);GO:0003700(DNA binding transcription factor activity);GO:0005515(protein binding);GO:0005634(nucleus);GO:0006351(transcription, DNA-templated);GO:0006355(regulation of transcription, DNA-templated);GO:0009873(ethylene-activated signaling pathway);GO:0048573(photoperiodism, flowering)				AP2/ERF-RAV	PREDICTED: LOW QUALITY PROTEIN: AP2/ERF and B3 domain-containing transcription factor RAV1-like [Pyrus x bretschneideri]	mrna	70.1706	93.0476	93.5494	3.00103	4.77544	4.12402	21.5762	4.43137	6.0028e-156	1.1592e-153	up	yes
EVM0040701	EVM0040701		EVM0040701.1	GO:0003677(DNA binding);GO:0003700(DNA binding transcription factor activity);GO:0005515(protein binding);GO:0005634(nucleus);GO:0006351(transcription, DNA-templated);GO:0009873(ethylene-activated signaling pathway);GO:0043565(sequence-specific DNA binding);GO:0045892(negative regulation of transcription, DNA-templated)				AP2/ERF-RAV	PREDICTED: AP2/ERF and B3 domain-containing transcription repressor RAV2-like [Pyrus x bretschneideri]	mrna	0.474635	3.21211	0.737221	0.264018	0.057971	0.131865	9.74755	3.28504	2.70559e-05	6.73399e-05	up	yes
EVM0010239	EVM0010239		EVM0010239.1	GO:0000741(karyogamy);GO:0003677(DNA binding);GO:0003682(chromatin binding);GO:0003700(DNA binding transcription factor activity);GO:0005515(protein binding);GO:0005634(nucleus);GO:0006351(transcription, DNA-templated);GO:0006355(regulation of transcription, DNA-templated);GO:0010197(polar nucleus fusion)				ARID	PREDICTED: high mobility group B protein 9 isoform X2 [Pyrus x bretschneideri]	mrna	0.818157	0.854821	0.705789	1.7295	2.9418	2.2127	0.34555	-1.53303	0.000129898	0.000297973	down	yes
EVM0031247	EVM0031247		EVM0031247.1	GO:0003677(DNA binding);GO:0005515(protein binding);GO:0005634(nucleus);GO:0005773(vacuole);GO:0006351(transcription, DNA-templated);GO:0006355(regulation of transcription, DNA-templated)				ARID	hypothetical protein DVH24_019922 [Malus domestica]	mrna	1.58711	1.27703	1.03288	2.79682	2.458	2.7899	0.484418	-1.04567	0.000257183	0.000568354	down	yes
EVM0023395	EVM0023395		EVM0023395.1					ARID	PREDICTED: high mobility group B protein 10-like [Pyrus x bretschneideri]	mrna	0	0	0.070855	0.527716	0.550292	0.405338	0.047767	-4.38784	0.0003475	0.00075551	down	yes
EVM0018330	EVM0018330		EVM0018330.1	GO:0003677(DNA binding);GO:0005515(protein binding);GO:0005634(nucleus);GO:0005773(vacuole);GO:0006351(transcription, DNA-templated);GO:0006355(regulation of transcription, DNA-templated)				ARID	PREDICTED: AT-rich interactive domain-containing protein 2-like [Pyrus x bretschneideri]	mrna	0.235089	0.338162	0.128822	0.536304	0.780172	0.641478	0.358575	-1.47965	0.00473789	0.00876397	down	yes
EVM0009766	EVM0009766		EVM0009766.1	GO:0000400(four-way junction DNA binding);GO:0003700(DNA binding transcription factor activity);GO:0005634(nucleus);GO:0006338(chromatin remodeling);GO:0006351(transcription, DNA-templated);GO:0006355(regulation of transcription, DNA-templated);GO:0008134(transcription factor binding);GO:0009846(pollen germination);GO:0009860(pollen tube growth);GO:0019760(glucosinolate metabolic process);GO:0043…				ARID	PREDICTED: high mobility group B protein 15 [Pyrus x bretschneideri]	mrna	0.368843	0.803454	0.194055	1.2659	0.979634	1.65376	0.35041	-1.51288	0.014836	0.0250634	down	yes
EVM0018003	EVM0018003		EVM0018003.1	GO:0003700(DNA binding transcription factor activity);GO:0005515(protein binding);GO:0005634(nucleus);GO:0006351(transcription, DNA-templated);GO:0006355(regulation of transcription, DNA-templated);GO:0009733(response to auxin);GO:0009734(auxin-activated signaling pathway);GO:0010114(response to red light);GO:0010218(response to far red light)	04075(Plant hormone signal transduction)	K14484		AUX/IAA	auxin-responsive protein IAA29-like [Malus domestica]	mrna	42.7026	17.1496	34.733	1.20069	1.16552	1.0851	27.4056	4.7764	3.95056e-61	1.23002e-59	up	yes
EVM0031297	EVM0031297		EVM0031297.1	GO:0003700(DNA binding transcription factor activity);GO:0005515(protein binding);GO:0005634(nucleus);GO:0006351(transcription, DNA-templated);GO:0006355(regulation of transcription, DNA-templated);GO:0009733(response to auxin);GO:0009734(auxin-activated signaling pathway)	04075(Plant hormone signal transduction)	K14484		AUX/IAA	PREDICTED: auxin-responsive protein IAA2-like isoform X1 [Pyrus x bretschneideri]	mrna	97.7099	90.6811	93.3909	25.4036	29.412	32.5529	3.22521	1.68939	1.44258e-60	4.43594e-59	up	yes
EVM0019292	EVM0019292		EVM0019292.1	GO:0003700(DNA binding transcription factor activity);GO:0005515(protein binding);GO:0005634(nucleus);GO:0006351(transcription, DNA-templated);GO:0006355(regulation of transcription, DNA-templated);GO:0009733(response to auxin);GO:0009734(auxin-activated signaling pathway);GO:0044212(transcription regulatory region DNA binding)	04075(Plant hormone signal transduction)	K14484		AUX/IAA	PREDICTED: auxin-responsive protein IAA4-like [Pyrus x bretschneideri]	mrna	85.2763	84.2137	90.1911	22.9396	17.7975	25.286	3.93318	1.9757	2.43692e-56	6.69283e-55	up	yes
EVM0004500	EVM0004500		EVM0004500.1	GO:0003700(DNA binding transcription factor activity);GO:0005515(protein binding);GO:0005634(nucleus);GO:0006351(transcription, DNA-templated);GO:0006355(regulation of transcription, DNA-templated);GO:0009733(response to auxin);GO:0009734(auxin-activated signaling pathway)	04075(Plant hormone signal transduction)	K14484		AUX/IAA	PREDICTED: auxin-responsive protein IAA16 [Pyrus x bretschneideri]	mrna	239.161	192.305	216.691	98.4632	105.011	102.961	2.11516	1.08077	9.00685e-38	1.40099e-36	up	yes
EVM0004978	EVM0004978		EVM0004978.1	GO:0003700(DNA binding transcription factor activity);GO:0005515(protein binding);GO:0005622(intracellular);GO:0005634(nucleus);GO:0006351(transcription, DNA-templated);GO:0006355(regulation of transcription, DNA-templated);GO:0006417(regulation of translation);GO:0009733(response to auxin);GO:0009734(auxin-activated signaling pathway)	04075(Plant hormone signal transduction)	K14484		AUX/IAA	PREDICTED: auxin-responsive protein IAA27-like [Pyrus x bretschneideri]	mrna	11.7574	7.94192	9.07818	40.2467	42.4544	35.14	0.244206	-2.03383	1.28494e-32	1.68147e-31	down	yes
EVM0006688	EVM0006688		EVM0006688.1	GO:0003700(DNA binding transcription factor activity);GO:0005515(protein binding);GO:0005634(nucleus);GO:0006351(transcription, DNA-templated);GO:0006355(regulation of transcription, DNA-templated);GO:0009733(response to auxin);GO:0009734(auxin-activated signaling pathway)	04075(Plant hormone signal transduction)	K14484		AUX/IAA	PREDICTED: auxin-responsive protein IAA11-like [Pyrus x bretschneideri]	mrna	42.6176	37.2618	44.5422	17.1243	19.4372	19.7965	2.2077	1.14255	2.80755e-26	2.82873e-25	up	yes
EVM0007890	EVM0007890		EVM0007890.1	GO:0003700(DNA binding transcription factor activity);GO:0005515(protein binding);GO:0005622(intracellular);GO:0005634(nucleus);GO:0006351(transcription, DNA-templated);GO:0006355(regulation of transcription, DNA-templated);GO:0006417(regulation of translation);GO:0009733(response to auxin);GO:0009734(auxin-activated signaling pathway)	04075(Plant hormone signal transduction)	K14484		AUX/IAA	PREDICTED: auxin-responsive protein IAA27-like [Pyrus x bretschneideri]	mrna	77.1213	61.7504	66.722	35.9122	33.2782	31.2483	2.04696	1.03348	5.36119e-26	5.34813e-25	up	yes
EVM0035173	EVM0035173		EVM0035173.1	GO:0003700(DNA binding transcription factor activity);GO:0005515(protein binding);GO:0005634(nucleus);GO:0006351(transcription, DNA-templated);GO:0006355(regulation of transcription, DNA-templated);GO:0009733(response to auxin);GO:0009734(auxin-activated signaling pathway);GO:0044212(transcription regulatory region DNA binding)	04075(Plant hormone signal transduction)	K14484		AUX/IAA	PREDICTED: auxin-induced protein 22D [Pyrus x bretschneideri]	mrna	22.7952	16.1309	17.4714	7.78847	7.41579	7.90406	2.44057	1.28722	1.62962e-20	1.25122e-19	up	yes
EVM0032070	EVM0032070		EVM0032070.1	GO:0003700(DNA binding transcription factor activity);GO:0005515(protein binding);GO:0005634(nucleus);GO:0006351(transcription, DNA-templated);GO:0006355(regulation of transcription, DNA-templated);GO:0009733(response to auxin);GO:0009734(auxin-activated signaling pathway);GO:0009880(embryonic pattern specification);GO:0010051(xylem and phloem pattern formation);GO:0045892(negative regulation of …	04075(Plant hormone signal transduction)	K14484		AUX/IAA	PREDICTED: auxin-responsive protein IAA13-like [Pyrus x bretschneideri]	mrna	7.15389	5.69434	4.84139	15.1038	15.1792	15.2861	0.388193	-1.36515	1.85647e-12	8.72054e-12	down	yes
EVM0028677	EVM0028677		EVM0028677.1	GO:0003677(DNA binding);GO:0003700(DNA binding transcription factor activity);GO:0005515(protein binding);GO:0005622(intracellular);GO:0005634(nucleus);GO:0006351(transcription, DNA-templated);GO:0006355(regulation of transcription, DNA-templated);GO:0006417(regulation of translation);GO:0009733(response to auxin);GO:0009734(auxin-activated signaling pathway);GO:0043565(sequence-specific DNA bind…	04075(Plant hormone signal transduction)	K14484		AUX/IAA	PREDICTED: auxin-induced protein 22D-like [Pyrus x bretschneideri]	mrna	14.6399	11.4173	13.6891	29.001	30.4555	31.183	0.43851	-1.18932	3.30015e-12	1.52522e-11	down	yes
EVM0022053	EVM0022053		EVM0022053.1	GO:0003700(DNA binding transcription factor activity);GO:0005515(protein binding);GO:0005634(nucleus);GO:0006351(transcription, DNA-templated);GO:0006355(regulation of transcription, DNA-templated);GO:0009733(response to auxin);GO:0009734(auxin-activated signaling pathway);GO:0010114(response to red light);GO:0010218(response to far red light)	04075(Plant hormone signal transduction)	K14484		AUX/IAA	auxin-responsive protein IAA29-like [Malus domestica]	mrna	1.48263	0.947558	1.39617	0	0	0	12754.5	13.6387	1.32212e-09	4.94123e-09	up	yes
EVM0004453	EVM0004453		EVM0004453.1	GO:0003700(DNA binding transcription factor activity);GO:0005634(nucleus);GO:0006351(transcription, DNA-templated);GO:0006355(regulation of transcription, DNA-templated);GO:0009733(response to auxin);GO:0009734(auxin-activated signaling pathway);GO:0043565(sequence-specific DNA binding)	04075(Plant hormone signal transduction)	K14484		AUX/IAA	PREDICTED: auxin-responsive protein IAA9 [Pyrus x bretschneideri]	mrna	6.77069	6.79748	5.0607	3.07512	2.91907	3.04863	2.06007	1.0427	7.9027e-07	2.30892e-06	up	yes
EVM0010041	EVM0010041		EVM0010041.1	GO:0003700(DNA binding transcription factor activity);GO:0005515(protein binding);GO:0005634(nucleus);GO:0006351(transcription, DNA-templated);GO:0006355(regulation of transcription, DNA-templated);GO:0009733(response to auxin);GO:0009734(auxin-activated signaling pathway)	04075(Plant hormone signal transduction)	K14484		AUX/IAA	hypothetical protein DVH24_020821 [Malus domestica]	mrna	21.0856	21.3698	21.0456	5.88578	14.1382	11.4183	2.01961	1.01407	5.29492e-06	1.42471e-05	up	yes
EVM0024367	EVM0024367		EVM0024367.1	GO:0003700(DNA binding transcription factor activity);GO:0005515(protein binding);GO:0005634(nucleus);GO:0006351(transcription, DNA-templated);GO:0006355(regulation of transcription, DNA-templated);GO:0009733(response to auxin);GO:0009734(auxin-activated signaling pathway)	04075(Plant hormone signal transduction)	K14484		AUX/IAA	PREDICTED: auxin-responsive protein IAA29 [Pyrus x bretschneideri]	mrna	2.82439	1.51568	2.22539	0.402265	0.87022	0.563668	3.57566	1.83821	6.98128e-06	1.85185e-05	up	yes
EVM0030483	EVM0030483		EVM0030483.1	GO:0003700(DNA binding transcription factor activity);GO:0005515(protein binding);GO:0005634(nucleus);GO:0006351(transcription, DNA-templated);GO:0006355(regulation of transcription, DNA-templated);GO:0009630(gravitropism);GO:0009638(phototropism);GO:0009733(response to auxin);GO:0009734(auxin-activated signaling pathway);GO:0080086(stamen filament development)	04075(Plant hormone signal transduction)	K14484		AUX/IAA	hypothetical protein DVH24_031398 [Malus domestica]	mrna	5.39963	3.77922	3.32082	10.982	7.98867	15.1622	0.366206	-1.44927	2.13876e-05	5.3785e-05	down	yes
EVM0012447	EVM0012447		EVM0012447.1	GO:0003700(DNA binding transcription factor activity);GO:0005515(protein binding);GO:0005634(nucleus);GO:0006351(transcription, DNA-templated);GO:0006355(regulation of transcription, DNA-templated);GO:0009733(response to auxin);GO:0009734(auxin-activated signaling pathway)	04075(Plant hormone signal transduction)	K14484		AUX/IAA	hypothetical protein DVH24_029134 [Malus domestica]	mrna	4.29312	3.2907	2.41201	1.85039	1.43112	1.15901	2.25105	1.1706	0.000203843	0.000456661	up	yes
EVM0015351	EVM0015351		EVM0015351.1	GO:0003700(DNA binding transcription factor activity);GO:0005515(protein binding);GO:0005634(nucleus);GO:0006351(transcription, DNA-templated);GO:0006355(regulation of transcription, DNA-templated);GO:0009733(response to auxin);GO:0009734(auxin-activated signaling pathway);GO:0010102(lateral root morphogenesis);GO:0016021(integral component of membrane);GO:0045892(negative regulation of transcrip…	04075(Plant hormone signal transduction)	K14484		AUX/IAA	PREDICTED: auxin-responsive protein IAA15-like [Pyrus x bretschneideri]	mrna	0.097084	0	0.344265	0	0	0	1471.16	10.5227	0.0238178	0.0387609	up	yes
EVM0020108	EVM0020108		EVM0020108.1	GO:0003677(DNA binding);GO:0005634(nucleus);GO:0006351(transcription, DNA-templated);GO:0006355(regulation of transcription, DNA-templated)				B3	PREDICTED: B3 domain-containing protein Os01g0234100-like [Malus domestica]	mrna	0.727591	0.599942	0.427289	9.10241	8.84751	8.57673	0.0661532	-3.91805	7.2768e-72	2.99007e-70	down	yes
EVM0035597	EVM0035597		EVM0035597.1	GO:0003677(DNA binding);GO:0003700(DNA binding transcription factor activity);GO:0005634(nucleus);GO:0006351(transcription, DNA-templated);GO:0006355(regulation of transcription, DNA-templated)				B3	PREDICTED: B3 domain-containing protein Os01g0234100-like [Pyrus x bretschneideri]	mrna	4.18747	4.51811	4.34062	0.347785	0.426489	0.531653	9.98999	3.32048	7.56254e-42	1.3505e-40	up	yes
EVM0001715	EVM0001715		EVM0001715.1	GO:0003677(DNA binding);GO:0003700(DNA binding transcription factor activity);GO:0005634(nucleus);GO:0006351(transcription, DNA-templated);GO:0006355(regulation of transcription, DNA-templated)				B3	PREDICTED: putative B3 domain-containing protein At5g58280 isoform X1 [Pyrus x bretschneideri]	mrna	3.67763	2.54347	3.31254	14.2171	16.63	14.8253	0.20874	-2.26022	2.64503e-36	3.91182e-35	down	yes
EVM0020010	EVM0020010		EVM0020010.1	GO:0003677(DNA binding);GO:0005634(nucleus);GO:0006351(transcription, DNA-templated);GO:0006355(regulation of transcription, DNA-templated)				B3	PREDICTED: B3 domain-containing protein At3g19184-like [Pyrus x bretschneideri]	mrna	1.14749	0.885774	1.47187	10.5434	10.8909	13.5879	0.100083	-3.32073	3.07395e-32	3.96001e-31	down	yes
EVM0006625	EVM0006625		EVM0006625.1	GO:0003700(DNA binding transcription factor activity);GO:0005515(protein binding);GO:0005634(nucleus);GO:0006351(transcription, DNA-templated);GO:0006355(regulation of transcription, DNA-templated);GO:0008270(zinc ion binding);GO:0010030(positive regulation of seed germination);GO:0043565(sequence-specific DNA binding);GO:2000034(regulation of seed maturation)				B3	B3 domain-containing transcription repressor VAL2-like [Malus domestica]	mrna	14.2651	17.4141	15.3616	6.88917	7.11764	7.02961	2.23615	1.16102	2.02683e-31	2.52213e-30	up	yes
EVM0038968	EVM0038968		EVM0038968.1	GO:0003677(DNA binding);GO:0003700(DNA binding transcription factor activity);GO:0005515(protein binding);GO:0005634(nucleus);GO:0005739(mitochondrion);GO:0006351(transcription, DNA-templated);GO:0008270(zinc ion binding);GO:0009737(response to abscisic acid);GO:0009744(response to sucrose);GO:0010030(positive regulation of seed germination);GO:0045892(negative regulation of transcription, DNA-te…				B3	PREDICTED: B3 domain-containing transcription repressor VAL2-like [Pyrus x bretschneideri]	mrna	9.40841	11.3661	10.3417	4.93023	4.43521	4.08682	2.31308	1.20982	5.22494e-25	4.98154e-24	up	yes
EVM0034290	EVM0034290		EVM0034290.1	GO:0003677(DNA binding);GO:0005634(nucleus);GO:0006351(transcription, DNA-templated);GO:0006355(regulation of transcription, DNA-templated)				B3	PREDICTED: B3 domain-containing protein At5g42700-like isoform X2 [Pyrus x bretschneideri]	mrna	8.81165	5.23205	7.72692	26.7687	27.9604	25.7379	0.270553	-1.88602	2.76378e-19	1.99464e-18	down	yes
EVM0038696	EVM0038696		EVM0038696.1					B3	PREDICTED: B3 domain-containing protein Os01g0723500-like [Pyrus x bretschneideri]	mrna	6.84684	7.42862	6.67607	16.4304	17.3053	14.5138	0.434233	-1.20346	3.66695e-18	2.47624e-17	down	yes
EVM0019549	EVM0019549		EVM0019549.1					B3	PREDICTED: B3 domain-containing protein Os11g0197600-like [Pyrus x bretschneideri]	mrna	0.0972	0.319926	0.06883	2.53253	2.41314	2.51722	0.0651164	-3.94084	2.07063e-15	1.1898e-14	down	yes
EVM0024221	EVM0024221		EVM0024221.1	GO:0003677(DNA binding);GO:0005634(nucleus);GO:0006351(transcription, DNA-templated);GO:0006355(regulation of transcription, DNA-templated)				B3	PREDICTED: B3 domain-containing protein At3g19184-like [Pyrus x bretschneideri]	mrna	1.1959	1.2082	1.35947	7.11867	4.8983	6.125	0.207451	-2.26916	4.56611e-13	2.23678e-12	down	yes
EVM0015570	EVM0015570		EVM0015570.1					B3	PREDICTED: B3 domain-containing protein REM10-like [Pyrus x bretschneideri]	mrna	6.39172	3.47481	3.67291	13.3383	18.2626	16.6402	0.280663	-1.83309	1.31017e-11	5.79846e-11	down	yes
EVM0010429	EVM0010429		EVM0010429.1	GO:0003677(DNA binding);GO:0003700(DNA binding transcription factor activity);GO:0005634(nucleus);GO:0006351(transcription, DNA-templated);GO:0006355(regulation of transcription, DNA-templated);GO:0009908(flower development);GO:0048366(leaf development);GO:1901371(regulation of leaf morphogenesis)				B3	hypothetical protein DVH24_039930 [Malus domestica]	mrna	10.0022	10.4618	11.0216	3.75095	5.97272	3.34951	2.40841	1.26808	5.97279e-11	2.50141e-10	up	yes
EVM0039372	EVM0039372		EVM0039372.1	GO:0003677(DNA binding);GO:0003700(DNA binding transcription factor activity);GO:0005515(protein binding);GO:0005634(nucleus);GO:0006351(transcription, DNA-templated);GO:0006355(regulation of transcription, DNA-templated)				B3	PREDICTED: B3 domain-containing protein Os01g0723500-like [Pyrus x bretschneideri]	mrna	8.76118	6.78467	5.92017	15.6942	15.8166	14.6615	0.464911	-1.10497	6.26833e-10	2.41412e-09	down	yes
EVM0030530	EVM0030530		EVM0030530.1	GO:0003677(DNA binding);GO:0005634(nucleus);GO:0006351(transcription, DNA-templated);GO:0006355(regulation of transcription, DNA-templated)				B3	PREDICTED: B3 domain-containing protein Os01g0234100-like [Pyrus x bretschneideri]	mrna	1.79398	1.91849	1.78625	5.12517	5.43937	4.24687	0.371249	-1.42954	1.0892e-08	3.76736e-08	down	yes
EVM0009879	EVM0009879		EVM0009879.1	GO:0003677(DNA binding);GO:0003700(DNA binding transcription factor activity);GO:0005515(protein binding);GO:0005634(nucleus);GO:0006351(transcription, DNA-templated);GO:0006355(regulation of transcription, DNA-templated)				B3	hypothetical protein DVH24_029967 [Malus domestica]	mrna	0	0	0	0.740426	0.572366	0.584272	0.000158139	-12.6265	1.57768e-08	5.38596e-08	down	yes
EVM0001305	EVM0001305		EVM0001305.1	GO:0003677(DNA binding);GO:0003700(DNA binding transcription factor activity);GO:0005634(nucleus);GO:0006351(transcription, DNA-templated);GO:0006355(regulation of transcription, DNA-templated)				B3	hypothetical protein DVH24_031300 [Malus domestica]	mrna	0	0.077455	0	5.35517	5.44498	5.53469	0.00474171	-7.72038	4.65351e-06	1.25967e-05	down	yes
EVM0031916	EVM0031916		EVM0031916.1	GO:0003677(DNA binding);GO:0005634(nucleus);GO:0006351(transcription, DNA-templated);GO:0006355(regulation of transcription, DNA-templated)				B3	PREDICTED: B3 domain-containing protein At5g42700-like [Pyrus x bretschneideri]	mrna	10.2421	7.29581	10.2451	17.6767	21.9932	16.9598	0.490608	-1.02736	4.7292e-06	1.27914e-05	down	yes
EVM0041878	EVM0041878		EVM0041878.1					B3	PREDICTED: B3 domain-containing transcription factor VRN1-like [Pyrus x bretschneideri]	mrna	0	0	0	0.40516	0.457441	0.304578	0.00025703	-11.9258	1.95539e-05	4.93603e-05	down	yes
EVM0020130	EVM0020130		EVM0020130.1					B3	PREDICTED: B3 domain-containing protein Os11g0197600-like [Pyrus x bretschneideri]	mrna	0	0	0	0.133045	0.270987	0.320095	0.000414292	-11.2371	3.58885e-05	8.80011e-05	down	yes
EVM0001764	EVM0001764		EVM0001764.1	GO:0003677(DNA binding);GO:0003700(DNA binding transcription factor activity);GO:0005634(nucleus);GO:0006351(transcription, DNA-templated);GO:0045892(negative regulation of transcription, DNA-templated);GO:0080167(response to karrikin)				B3	PREDICTED: B3 domain-containing protein At2g36080-like [Pyrus x bretschneideri]	mrna	1.20437	2.23179	0.976421	0.244012	0.570467	0.189447	4.39532	2.13597	4.53472e-05	0.000110043	up	yes
EVM0015243	EVM0015243		EVM0015243.1	GO:0003677(DNA binding);GO:0003700(DNA binding transcription factor activity);GO:0005634(nucleus);GO:0006351(transcription, DNA-templated);GO:0006355(regulation of transcription, DNA-templated)				B3	PREDICTED: B3 domain-containing protein Os01g0234100-like [Pyrus x bretschneideri]	mrna	0.577298	0.668112	0.483675	1.24964	1.66727	1.54649	0.387391	-1.36814	0.000329543	0.000718693	down	yes
EVM0019807	EVM0019807		EVM0019807.1	GO:0003677(DNA binding);GO:0005634(nucleus);GO:0006351(transcription, DNA-templated);GO:0006355(regulation of transcription, DNA-templated)				B3	hypothetical protein DVH24_021617 [Malus domestica]	mrna	1.88344	1.13753	1.00792	2.60738	2.81306	3.57315	0.447973	-1.15852	0.000349751	0.000760229	down	yes
EVM0020148	EVM0020148		EVM0020148.1	GO:0003677(DNA binding);GO:0003700(DNA binding transcription factor activity);GO:0005634(nucleus);GO:0006351(transcription, DNA-templated);GO:0006355(regulation of transcription, DNA-templated)				B3	hypothetical protein DVH24_021561 [Malus domestica]	mrna	0.648898	1.1835	0.799309	2.11295	2.40604	2.77593	0.360758	-1.4709	0.000386461	0.000835393	down	yes
EVM0002799	EVM0002799		EVM0002799.1	GO:0003677(DNA binding);GO:0005634(nucleus);GO:0006351(transcription, DNA-templated);GO:0006355(regulation of transcription, DNA-templated)				B3	PREDICTED: B3 domain-containing protein Os01g0234100-like [Pyrus x bretschneideri]	mrna	0.368817	0.19454	0.12674	0.786837	0.894491	0.886943	0.268701	-1.89593	0.000522442	0.00110926	down	yes
EVM0036916	EVM0036916		EVM0036916.1	GO:0003700(DNA binding transcription factor activity);GO:0005515(protein binding);GO:0005634(nucleus);GO:0006351(transcription, DNA-templated);GO:0006355(regulation of transcription, DNA-templated);GO:0009734(auxin-activated signaling pathway);GO:0043565(sequence-specific DNA binding)	04075(Plant hormone signal transduction)	K14486		B3-ARF	PREDICTED: auxin response factor 18 isoform X1 [Pyrus x bretschneideri]	mrna	4.07785	3.94795	4.44813	16.7424	15.7964	14.4162	0.265657	-1.91236	9.80875e-58	2.80124e-56	down	yes
EVM0039345	EVM0039345		EVM0039345.1	GO:0003677(DNA binding);GO:0003700(DNA binding transcription factor activity);GO:0005515(protein binding);GO:0005634(nucleus);GO:0006351(transcription, DNA-templated);GO:0006355(regulation of transcription, DNA-templated);GO:0009734(auxin-activated signaling pathway);GO:0010050(vegetative phase change);GO:0010158(abaxial cell fate specification)	04075(Plant hormone signal transduction)	K14486		B3-ARF	PREDICTED: auxin response factor 4-like [Pyrus x bretschneideri]	mrna	9.91987	8.47745	7.54519	27.8343	23.7005	22.7975	0.349007	-1.51867	2.02608e-27	2.14456e-26	down	yes
EVM0035960	EVM0035960		EVM0035960.1	GO:0003677(DNA binding);GO:0003700(DNA binding transcription factor activity);GO:0005515(protein binding);GO:0005634(nucleus);GO:0006351(transcription, DNA-templated);GO:0006355(regulation of transcription, DNA-templated);GO:0009723(response to ethylene);GO:0009733(response to auxin);GO:0009734(auxin-activated signaling pathway);GO:0010311(lateral root formation);GO:0043565(sequence-specific DNA …	04075(Plant hormone signal transduction)	K14486		B3-ARF	PREDICTED: auxin response factor 19-like isoform X1 [Pyrus x bretschneideri]	mrna	16.0904	14.536	18.6503	8.03954	6.97647	6.52681	2.28738	1.1937	1.64585e-24	1.53617e-23	up	yes
EVM0039739	EVM0039739		EVM0039739.1	GO:0003700(DNA binding transcription factor activity);GO:0005515(protein binding);GO:0005634(nucleus);GO:0006351(transcription, DNA-templated);GO:0006355(regulation of transcription, DNA-templated);GO:0009734(auxin-activated signaling pathway);GO:0043565(sequence-specific DNA binding)	04075(Plant hormone signal transduction)	K14486		B3-ARF	PREDICTED: auxin response factor 9-like [Pyrus x bretschneideri]	mrna	9.4226	8.8742	9.82267	22.1816	21.5864	18.6362	0.450603	-1.15007	3.39402e-19	2.43534e-18	down	yes
EVM0012195	EVM0012195		EVM0012195.1	GO:0003677(DNA binding);GO:0003700(DNA binding transcription factor activity);GO:0005515(protein binding);GO:0005634(nucleus);GO:0006351(transcription, DNA-templated);GO:0006355(regulation of transcription, DNA-templated);GO:0009733(response to auxin);GO:0009734(auxin-activated signaling pathway);GO:0009908(flower development)	04075(Plant hormone signal transduction)	K14486		B3-ARF	auxin response factor 6-like [Malus domestica]	mrna	20.2288	21.4755	18.9596	56.0376	56.0609	39.5408	0.400054	-1.32173	1.28073e-18	8.9101e-18	down	yes
EVM0011076	EVM0011076		EVM0011076.1	GO:0003677(DNA binding);GO:0003700(DNA binding transcription factor activity);GO:0005515(protein binding);GO:0005634(nucleus);GO:0006351(transcription, DNA-templated);GO:0006355(regulation of transcription, DNA-templated);GO:0007389(pattern specification process);GO:0009733(response to auxin);GO:0009734(auxin-activated signaling pathway);GO:0035198(miRNA binding);GO:0048829(root cap development);…	04075(Plant hormone signal transduction)	K14486		B3-ARF	PREDICTED: auxin response factor 18-like isoform X1 [Pyrus x bretschneideri]	mrna	2.29286	2.71458	2.40676	1.00688	0.829972	0.728592	2.89002	1.53108	6.73771e-14	3.50122e-13	up	yes
EVM0037064	EVM0037064		EVM0037064.1	GO:0003677(DNA binding);GO:0003700(DNA binding transcription factor activity);GO:0005515(protein binding);GO:0005634(nucleus);GO:0006351(transcription, DNA-templated);GO:0006355(regulation of transcription, DNA-templated);GO:0009734(auxin-activated signaling pathway);GO:0010050(vegetative phase change);GO:0010158(abaxial cell fate specification)	04075(Plant hormone signal transduction)	K14486		B3-ARF	PREDICTED: auxin response factor 4-like [Pyrus x bretschneideri]	mrna	15.6607	12.2936	10.4186	38.7421	34.7467	26.6077	0.383359	-1.38323	1.70254e-13	8.599e-13	down	yes
EVM0041437	EVM0041437		EVM0041437.1	GO:0003677(DNA binding);GO:0003700(DNA binding transcription factor activity);GO:0005634(nucleus);GO:0006351(transcription, DNA-templated);GO:0006355(regulation of transcription, DNA-templated);GO:0007389(pattern specification process);GO:0009734(auxin-activated signaling pathway);GO:0009738(abscisic acid-activated signaling pathway);GO:0009743(response to carbohydrate);GO:0010154(fruit developme…	04075(Plant hormone signal transduction)	K14486		B3-ARF	hypothetical protein DVH24_038862 [Malus domestica]	mrna	2.12536	2.75153	2.43976	6.77188	6.9804	5.2442	0.385159	-1.37647	9.84733e-13	4.72573e-12	down	yes
EVM0029606	EVM0029606		EVM0029606.1	GO:0000987(proximal promoter sequence-specific DNA binding);GO:0003700(DNA binding transcription factor activity);GO:0005634(nucleus);GO:0006351(transcription, DNA-templated);GO:0006355(regulation of transcription, DNA-templated);GO:0009555(pollen development);GO:0009653(anatomical structure morphogenesis);GO:0009734(auxin-activated signaling pathway);GO:0010208(pollen wall assembly);GO:0048830(a…	04075(Plant hormone signal transduction)	K14486		B3-ARF	PREDICTED: auxin response factor 17-like [Pyrus x bretschneideri]	mrna	0.323118	0.482854	0.329817	0.135082	0.033939	0.101626	4.19657	2.06921	0.00167613	0.00332223	up	yes
EVM0014649	EVM0014649		EVM0014649.1	GO:0003677(DNA binding);GO:0003700(DNA binding transcription factor activity);GO:0005515(protein binding);GO:0005634(nucleus);GO:0005730(nucleolus);GO:0006351(transcription, DNA-templated);GO:0006355(regulation of transcription, DNA-templated);GO:0009723(response to ethylene);GO:0042803(protein homodimerization activity);GO:0043565(sequence-specific DNA binding)				BBR-BPC	PREDICTED: protein BASIC PENTACYSTEINE6-like [Pyrus x bretschneideri]	mrna	29.7749	33.1292	30.8254	14.986	14.948	13.6994	2.14811	1.10307	4.78717e-31	5.87465e-30	up	yes
EVM0007597	EVM0007597		EVM0007597.1	GO:0003677(DNA binding);GO:0003700(DNA binding transcription factor activity);GO:0005515(protein binding);GO:0005634(nucleus);GO:0005737(cytoplasm);GO:0006351(transcription, DNA-templated);GO:0006355(regulation of transcription, DNA-templated);GO:0009723(response to ethylene);GO:0042803(protein homodimerization activity);GO:0043565(sequence-specific DNA binding);GO:0050793(regulation of developme…				BBR-BPC	PREDICTED: protein BASIC PENTACYSTEINE4-like isoform X1 [Pyrus x bretschneideri]	mrna	4.20147	4.61868	4.24741	9.33167	8.72637	9.29688	0.477704	-1.06581	5.52881e-11	2.32225e-10	down	yes
EVM0029032	EVM0029032		EVM0029032.1	GO:0003677(DNA binding);GO:0003700(DNA binding transcription factor activity);GO:0005515(protein binding);GO:0005634(nucleus);GO:0005829(cytosol);GO:0006351(transcription, DNA-templated);GO:0006355(regulation of transcription, DNA-templated);GO:0009742(brassinosteroid mediated signaling pathway);GO:0040008(regulation of growth);GO:0045892(negative regulation of transcription, DNA-templated);GO:00…	04075(Plant hormone signal transduction)	K14503		BES1	PREDICTED: protein BRASSINAZOLE-RESISTANT 1-like [Pyrus x bretschneideri]	mrna	34.2961	37.2771	33.6648	10.2873	12.2627	11.248	3.11374	1.63865	1.39589e-53	3.54383e-52	up	yes
EVM0041472	EVM0041472		EVM0041472.1	GO:0003677(DNA binding);GO:0003700(DNA binding transcription factor activity);GO:0005634(nucleus);GO:0006351(transcription, DNA-templated);GO:0006355(regulation of transcription, DNA-templated);GO:0009742(brassinosteroid mediated signaling pathway)	04075(Plant hormone signal transduction)	K14503		BES1	PREDICTED: BES1/BZR1 homolog protein 4-like [Pyrus x bretschneideri]	mrna	31.5433	32.3804	33.4542	7.79405	8.72895	6.07537	4.30907	2.10738	1.55339e-53	3.93565e-52	up	yes
EVM0001604	EVM0001604		EVM0001604.1	GO:0003677(DNA binding);GO:0003700(DNA binding transcription factor activity);GO:0005515(protein binding);GO:0005634(nucleus);GO:0005829(cytosol);GO:0006351(transcription, DNA-templated);GO:0006355(regulation of transcription, DNA-templated);GO:0009742(brassinosteroid mediated signaling pathway);GO:0040008(regulation of growth);GO:0045892(negative regulation of transcription, DNA-templated);GO:00…	04075(Plant hormone signal transduction)	K14503		BES1	PREDICTED: protein BRASSINAZOLE-RESISTANT 1-like [Pyrus x bretschneideri]	mrna	18.4455	24.7846	20.4415	6.64651	8.2835	4.95044	3.20272	1.6793	8.48466e-19	5.96857e-18	up	yes
EVM0012175	EVM0012175		EVM0012175.1	GO:0001708(cell fate specification);GO:0003677(DNA binding);GO:0003700(DNA binding transcription factor activity);GO:0005515(protein binding);GO:0005634(nucleus);GO:0006351(transcription, DNA-templated);GO:0006355(regulation of transcription, DNA-templated);GO:0007275(multicellular organism development);GO:0009867(jasmonic acid mediated signaling pathway);GO:0009957(epidermal cell fate specificat…	00860(Porphyrin and chlorophyll metabolism)	K01772	EC:4.99.1.1;EC:4.99.1.9	bHLH	PREDICTED: transcription factor EGL1 [Pyrus x bretschneideri]	mrna	2.29897	1.98817	2.25135	9.43884	10.8141	11.2137	0.207791	-2.26679	3.50496e-59	1.03837e-57	down	yes
EVM0036520	EVM0036520		EVM0036520.2	GO:0003677(DNA binding);GO:0003700(DNA binding transcription factor activity);GO:0005515(protein binding);GO:0005634(nucleus);GO:0006351(transcription, DNA-templated);GO:0006355(regulation of transcription, DNA-templated);GO:0043565(sequence-specific DNA binding);GO:0046983(protein dimerization activity)				bHLH	PREDICTED: transcription factor bHLH121 [Pyrus x bretschneideri]	mrna	13.2863	13.78	14.111	3.19421	4.24828	3.44235	3.783	1.91953	6.94358e-53	1.7229e-51	up	yes
EVM0014255	EVM0014255		EVM0014255.1	GO:0003677(DNA binding);GO:0003700(DNA binding transcription factor activity);GO:0005515(protein binding);GO:0005634(nucleus);GO:0006351(transcription, DNA-templated);GO:0006355(regulation of transcription, DNA-templated);GO:0009637(response to blue light);GO:0040008(regulation of growth);GO:0046983(protein dimerization activity)				bHLH	PREDICTED: transcription factor bHLH74 isoform X1 [Pyrus x bretschneideri]	mrna	6.13136	5.87628	5.29461	23.6652	22.207	21.0913	0.258383	-1.95242	2.88728e-50	6.65467e-49	down	yes
EVM0006992	EVM0006992		EVM0006992.1	GO:0003677(DNA binding);GO:0003700(DNA binding transcription factor activity);GO:0005515(protein binding);GO:0005634(nucleus);GO:0006351(transcription, DNA-templated);GO:0006355(regulation of transcription, DNA-templated);GO:0046983(protein dimerization activity)				bHLH	PREDICTED: transcription factor BEE 3-like [Pyrus x bretschneideri]	mrna	10.1963	8.85562	14.9709	0.356386	0.23386	0.669989	26.9973	4.75474	6.73338e-43	1.23924e-41	up	yes
EVM0008290	EVM0008290		EVM0008290.1	GO:0003677(DNA binding);GO:0003700(DNA binding transcription factor activity);GO:0005515(protein binding);GO:0005634(nucleus);GO:0006351(transcription, DNA-templated);GO:0006355(regulation of transcription, DNA-templated);GO:0009637(response to blue light);GO:0040008(regulation of growth);GO:0046983(protein dimerization activity)				bHLH	hypothetical protein DVH24_020556 [Malus domestica]	mrna	1.54085	1.70331	1.2132	8.39561	10.5615	11.2763	0.147432	-2.76188	4.9351e-36	7.24405e-35	down	yes
EVM0013440	EVM0013440		EVM0013440.1	GO:0003677(DNA binding);GO:0003700(DNA binding transcription factor activity);GO:0005634(nucleus);GO:0006351(transcription, DNA-templated);GO:0006355(regulation of transcription, DNA-templated);GO:0046983(protein dimerization activity)				bHLH	PREDICTED: transcription factor bHLH51-like [Pyrus x bretschneideri]	mrna	21.9678	32.0083	21.7674	6.48083	6.90625	7.27475	3.66586	1.87415	2.293e-31	2.84669e-30	up	yes
EVM0010810	EVM0010810		EVM0010810.1	GO:0003677(DNA binding);GO:0003700(DNA binding transcription factor activity);GO:0005515(protein binding);GO:0005634(nucleus);GO:0005737(cytoplasm);GO:0006351(transcription, DNA-templated);GO:0006355(regulation of transcription, DNA-templated);GO:0010629(negative regulation of gene expression);GO:0046983(protein dimerization activity)	04016(MAPK signaling pathway - plant);04075(Plant hormone signal transduction)	K13422		bHLH	hypothetical protein DVH24_008326 [Malus domestica]	mrna	39.921	33.8427	26.5312	5.94047	10.5126	6.82275	4.30898	2.10735	5.71841e-27	5.93812e-26	up	yes
EVM0031105	EVM0031105		EVM0031105.1	GO:0001046(core promoter sequence-specific DNA binding);GO:0001228(transcriptional activator activity, RNA polymerase II transcription regulatory region sequence-specific DNA binding);GO:0005634(nucleus);GO:0006366(transcription by RNA polymerase II)	04075(Plant hormone signal transduction);04712(Circadian rhythm - plant)	K12126		bHLH	PREDICTED: transcription factor bHLH122-like isoform X1 [Pyrus x bretschneideri]	mrna	15.9266	14.8537	13.7615	32.6913	35.4099	34.7437	0.433097	-1.20724	3.00933e-25	2.90406e-24	down	yes
EVM0025410	EVM0025410		EVM0025410.1	GO:0001046(core promoter sequence-specific DNA binding);GO:0001228(transcriptional activator activity, RNA polymerase II transcription regulatory region sequence-specific DNA binding);GO:0005634(nucleus);GO:0006366(transcription by RNA polymerase II)				bHLH	PREDICTED: transcription factor bHLH128 [Pyrus x bretschneideri]	mrna	48.1548	49.2859	53.4039	21.4495	27.2437	23.8577	2.07916	1.056	7.39283e-25	7.01078e-24	up	yes
EVM0022639	EVM0022639		EVM0022639.1	GO:0001046(core promoter sequence-specific DNA binding);GO:0001228(transcriptional activator activity, RNA polymerase II transcription regulatory region sequence-specific DNA binding);GO:0005634(nucleus);GO:0006366(transcription by RNA polymerase II)	04075(Plant hormone signal transduction);04712(Circadian rhythm - plant)	K12126		bHLH	PREDICTED: transcription factor UNE12 isoform X2 [Pyrus x bretschneideri]	mrna	10.3194	11.7258	11.2004	5.22838	5.08022	5.4618	2.1081	1.07594	2.53259e-24	2.33805e-23	up	yes
EVM0001777	EVM0001777		EVM0001777.1	GO:0001046(core promoter sequence-specific DNA binding);GO:0001228(transcriptional activator activity, RNA polymerase II transcription regulatory region sequence-specific DNA binding);GO:0005634(nucleus);GO:0006366(transcription by RNA polymerase II)	04075(Plant hormone signal transduction)	K16189		bHLH	PREDICTED: transcription factor bHLH66-like [Pyrus x bretschneideri]	mrna	12.1653	10.3333	10.3641	29.201	30.2634	25.2164	0.388076	-1.36559	1.38078e-23	1.22935e-22	down	yes
EVM0019121	EVM0019121		EVM0019121.1	GO:0003677(DNA binding);GO:0003700(DNA binding transcription factor activity);GO:0005634(nucleus);GO:0006351(transcription, DNA-templated);GO:0006355(regulation of transcription, DNA-templated);GO:0046983(protein dimerization activity)				bHLH	PREDICTED: transcription factor bHLH51-like [Pyrus x bretschneideri]	mrna	1.65046	0.883463	2.05841	13.1303	10.8552	11.4232	0.129695	-2.94681	5.9201e-23	5.1026e-22	down	yes
EVM0002898	EVM0002898		EVM0002898.1	GO:0001046(core promoter sequence-specific DNA binding);GO:0001228(transcriptional activator activity, RNA polymerase II transcription regulatory region sequence-specific DNA binding);GO:0005634(nucleus);GO:0006366(transcription by RNA polymerase II)				bHLH	PREDICTED: transcription factor bHLH130-like [Pyrus x bretschneideri]	mrna	4.09024	3.14473	4.90068	0.495439	0.310608	0.408294	9.9936	3.32101	1.03316e-22	8.81921e-22	up	yes
EVM0030923	EVM0030923		EVM0030923.1	GO:0000977(RNA polymerase II regulatory region sequence-specific DNA binding);GO:0003700(DNA binding transcription factor activity);GO:0006357(regulation of transcription by RNA polymerase II);GO:0090575(RNA polymerase II transcription factor complex)				bHLH	PREDICTED: transcription factor bHLH118-like [Malus domestica]	mrna	0.137752	0.107778	0.136378	2.96216	2.06026	2.9225	0.0480694	-4.37874	3.7364e-20	2.82058e-19	down	yes
EVM0026651	EVM0026651		EVM0026651.1	GO:0000977(RNA polymerase II regulatory region sequence-specific DNA binding);GO:0003700(DNA binding transcription factor activity);GO:0006357(regulation of transcription by RNA polymerase II);GO:0090575(RNA polymerase II transcription factor complex)				bHLH	PREDICTED: transcription factor bHLH36-like [Pyrus x bretschneideri]	mrna	2.39132	3.03323	3.44886	0.215525	0.077456	0.160822	19.5534	4.28935	1.20352e-19	8.85744e-19	up	yes
EVM0028364	EVM0028364		EVM0028364.1	GO:0003677(DNA binding);GO:0003700(DNA binding transcription factor activity);GO:0005515(protein binding);GO:0005634(nucleus);GO:0006351(transcription, DNA-templated);GO:0006355(regulation of transcription, DNA-templated);GO:0046983(protein dimerization activity)				bHLH	PREDICTED: transcription factor bHLH48-like [Pyrus x bretschneideri]	mrna	8.89202	7.07229	8.38034	21.8847	23.8492	19.7876	0.371552	-1.42836	3.12083e-19	2.24321e-18	down	yes
EVM0021103	EVM0021103		EVM0021103.1	GO:0000977(RNA polymerase II regulatory region sequence-specific DNA binding);GO:0003700(DNA binding transcription factor activity);GO:0006357(regulation of transcription by RNA polymerase II);GO:0090575(RNA polymerase II transcription factor complex)				bHLH	PREDICTED: transcription factor bHLH36-like [Malus domestica]	mrna	58.5521	32.1348	37.5361	10.011	14.1559	12.3196	3.51427	1.81322	5.79575e-19	4.11275e-18	up	yes
EVM0002730	EVM0002730		EVM0002730.1	GO:0005634(nucleus)				bHLH	PREDICTED: transcription factor bHLH96-like [Pyrus x bretschneideri]	mrna	124.613	47.1845	62.4394	6.46034	4.5045	5.28643	14.4134	3.84934	1.50066e-18	1.03955e-17	up	yes
EVM0040797	EVM0040797		EVM0040797.1	GO:0001708(cell fate specification);GO:0003677(DNA binding);GO:0003700(DNA binding transcription factor activity);GO:0005515(protein binding);GO:0005634(nucleus);GO:0006351(transcription, DNA-templated);GO:0006355(regulation of transcription, DNA-templated);GO:0007275(multicellular organism development);GO:0009867(jasmonic acid mediated signaling pathway);GO:0009957(epidermal cell fate specificat…	04016(MAPK signaling pathway - plant);04075(Plant hormone signal transduction)	K13422		bHLH	PREDICTED: transcription factor EGL1-like [Pyrus x bretschneideri]	mrna	6.86923	7.2275	4.98637	19.7674	19.1124	16.704	0.343321	-1.54237	2.70982e-18	1.84528e-17	down	yes
EVM0027019	EVM0027019		EVM0027019.1	GO:0005634(nucleus)				bHLH	PREDICTED: transcription factor bHLH94-like [Pyrus x bretschneideri]	mrna	4.81945	1.82282	2.67851	15.9398	16.0843	17.8565	0.186862	-2.41995	6.33813e-17	3.98072e-16	down	yes
EVM0029883	EVM0029883		EVM0029883.1	GO:0003677(DNA binding);GO:0003700(DNA binding transcription factor activity);GO:0005515(protein binding);GO:0005634(nucleus);GO:0006351(transcription, DNA-templated);GO:0006355(regulation of transcription, DNA-templated);GO:0007275(multicellular organism development);GO:0046983(protein dimerization activity)				bHLH	PREDICTED: transcription factor bHLH71-like [Pyrus x bretschneideri]	mrna	3.33836	5.07534	4.6072	13.302	12.3097	12.7273	0.339625	-1.55799	1.0586e-15	6.19942e-15	down	yes
EVM0017956	EVM0017956		EVM0017956.1	GO:0003677(DNA binding);GO:0003700(DNA binding transcription factor activity);GO:0005634(nucleus);GO:0006351(transcription, DNA-templated);GO:0006355(regulation of transcription, DNA-templated);GO:0046983(protein dimerization activity)	04016(MAPK signaling pathway - plant);04075(Plant hormone signal transduction)	K13422		bHLH	PREDICTED: transcription factor bHLH18-like [Pyrus x bretschneideri]	mrna	3.64977	2.07636	1.9984	0	0	0	25748.5	14.6522	1.76749e-15	1.02081e-14	up	yes
EVM0023052	EVM0023052		EVM0023052.1	GO:0000977(RNA polymerase II regulatory region sequence-specific DNA binding);GO:0003700(DNA binding transcription factor activity);GO:0006357(regulation of transcription by RNA polymerase II);GO:0090575(RNA polymerase II transcription factor complex)				bHLH	PREDICTED: transcription factor bHLH36-like [Pyrus x bretschneideri]	mrna	60.3982	40.6871	62.0263	1.54634	5.53712	2.87955	16.3717	4.03313	4.98823e-15	2.79853e-14	up	yes
EVM0028081	EVM0028081		EVM0028081.1	GO:0003677(DNA binding);GO:0003700(DNA binding transcription factor activity);GO:0005634(nucleus);GO:0006351(transcription, DNA-templated);GO:0006355(regulation of transcription, DNA-templated);GO:0046983(protein dimerization activity)				bHLH	PREDICTED: transcription factor bHLH57-like isoform X1 [Pyrus x bretschneideri]	mrna	0.62256	1.22217	1.30301	5.21256	5.4164	4.58704	0.20687	-2.2732	8.01851e-15	4.43781e-14	down	yes
EVM0030950	EVM0030950		EVM0030950.1	GO:0005515(protein binding)				bHLH	PREDICTED: transcription factor bHLH140-like [Pyrus x bretschneideri]	mrna	0.211666	0.338352	0.1209	2.47262	4.4052	2.79049	0.0693935	-3.84906	3.24851e-14	1.72084e-13	down	yes
EVM0040880	EVM0040880		EVM0040880.1	GO:0003677(DNA binding);GO:0003700(DNA binding transcription factor activity);GO:0005515(protein binding);GO:0005634(nucleus);GO:0005737(cytoplasm);GO:0006351(transcription, DNA-templated);GO:0006355(regulation of transcription, DNA-templated);GO:0010629(negative regulation of gene expression);GO:0044212(transcription regulatory region DNA binding);GO:0046983(protein dimerization activity)	04016(MAPK signaling pathway - plant);04075(Plant hormone signal transduction)	K13422		bHLH	PREDICTED: transcription factor bHLH13 isoform X1 [Pyrus x bretschneideri]	mrna	4.38905	3.59596	3.49578	8.80146	9.58976	7.83651	0.437734	-1.19187	1.87066e-13	9.42514e-13	down	yes
EVM0015761	EVM0015761		EVM0015761.1	GO:0003677(DNA binding);GO:0003700(DNA binding transcription factor activity);GO:0005634(nucleus);GO:0006351(transcription, DNA-templated);GO:0006355(regulation of transcription, DNA-templated);GO:0007275(multicellular organism development);GO:0010371(regulation of gibberellin biosynthetic process);GO:0045487(gibberellin catabolic process);GO:0046983(protein dimerization activity)	00040(Pentose and glucuronate interconversions);00053(Ascorbate and aldarate metabolism);00520(Amino sugar and nucleotide sugar metabolism)	K16190	EC:2.7.1.43	bHLH	PREDICTED: transcription factor bHLH93-like [Pyrus x bretschneideri]	mrna	8.18318	5.03287	5.86447	17.7428	17.8766	17.6303	0.358322	-1.48067	4.99147e-13	2.44034e-12	down	yes
EVM0007632	EVM0007632		EVM0007632.1	GO:0001046(core promoter sequence-specific DNA binding);GO:0001228(transcriptional activator activity, RNA polymerase II transcription regulatory region sequence-specific DNA binding);GO:0005634(nucleus);GO:0006366(transcription by RNA polymerase II)	04075(Plant hormone signal transduction);04712(Circadian rhythm - plant)	K12126		bHLH	PREDICTED: transcription factor UNE12-like isoform X2 [Malus domestica]	mrna	8.92582	8.88328	8.64099	4.80623	4.29049	3.6541	2.07438	1.05268	5.22026e-12	2.38395e-11	up	yes
EVM0004976	EVM0004976		EVM0004976.1	GO:0003677(DNA binding);GO:0003700(DNA binding transcription factor activity);GO:0005515(protein binding);GO:0005634(nucleus);GO:0006351(transcription, DNA-templated);GO:0009409(response to cold);GO:0010440(stomatal lineage progression);GO:0045893(positive regulation of transcription, DNA-templated);GO:0046983(protein dimerization activity);GO:0050826(response to freezing)	04016(MAPK signaling pathway - plant);04075(Plant hormone signal transduction)	K13422		bHLH	PREDICTED: transcription factor ICE1-like [Pyrus x bretschneideri]	mrna	4.83595	6.2283	5.69308	13.4776	13.7158	11.1321	0.437237	-1.19351	1.62464e-11	7.13849e-11	down	yes
EVM0014204	EVM0014204		EVM0014204.1	GO:0005634(nucleus);GO:0005737(cytoplasm);GO:0006351(transcription, DNA-templated);GO:0006355(regulation of transcription, DNA-templated);GO:0009416(response to light stimulus);GO:0040008(regulation of growth);GO:0046983(protein dimerization activity)				bHLH	PREDICTED: transcription factor PRE6 [Pyrus x bretschneideri]	mrna	1.97463	0.43087	1.24729	11.1449	7.66277	8.79242	0.132347	-2.9176	2.76491e-11	1.19528e-10	down	yes
EVM0011767	EVM0011767		EVM0011767.1	GO:0003677(DNA binding);GO:0003700(DNA binding transcription factor activity);GO:0005634(nucleus);GO:0006351(transcription, DNA-templated);GO:0006355(regulation of transcription, DNA-templated);GO:0046983(protein dimerization activity)	04016(MAPK signaling pathway - plant);04075(Plant hormone signal transduction)	K13422		bHLH	PREDICTED: transcription factor bHLH30 [Pyrus x bretschneideri]	mrna	3.19371	3.69098	3.40413	8.48767	9.45131	7.84688	0.39901	-1.3255	6.17299e-11	2.58205e-10	down	yes
EVM0042440	EVM0042440		EVM0042440.1	GO:0003677(DNA binding);GO:0003700(DNA binding transcription factor activity);GO:0005515(protein binding);GO:0005634(nucleus);GO:0006351(transcription, DNA-templated);GO:0009409(response to cold);GO:0010440(stomatal lineage progression);GO:0045893(positive regulation of transcription, DNA-templated);GO:0046983(protein dimerization activity);GO:0050826(response to freezing)	04016(MAPK signaling pathway - plant);04075(Plant hormone signal transduction)	K13422		bHLH	PREDICTED: transcription factor ICE1-like [Pyrus x bretschneideri]	mrna	3.03072	3.63118	3.53166	8.7667	8.3767	6.579	0.429702	-1.21859	6.60948e-11	2.75875e-10	down	yes
EVM0032953	EVM0032953		EVM0032953.1	GO:0003677(DNA binding);GO:0005524(ATP binding);GO:0005634(nucleus);GO:0006260(DNA replication);GO:0006351(transcription, DNA-templated);GO:0006355(regulation of transcription, DNA-templated);GO:0006790(sulfur compound metabolic process);GO:0009150(purine ribonucleotide metabolic process);GO:0046872(metal ion binding);GO:0046983(protein dimerization activity);GO:0047627(adenylylsulfatase activity…				bHLH	PREDICTED: transcription factor bHLH140-like [Pyrus x bretschneideri]	mrna	0.443125	0.960846	0.194578	4.21132	5.94696	5.77687	0.100316	-3.31738	2.96526e-10	1.17379e-09	down	yes
EVM0035141	EVM0035141		EVM0035141.1	GO:0000978(RNA polymerase II proximal promoter sequence-specific DNA binding);GO:0003677(DNA binding);GO:0003682(chromatin binding);GO:0003700(DNA binding transcription factor activity);GO:0005515(protein binding);GO:0005634(nucleus);GO:0006351(transcription, DNA-templated);GO:0006355(regulation of transcription, DNA-templated);GO:0009555(pollen development);GO:0046983(protein dimerization activi…	00040(Pentose and glucuronate interconversions);00053(Ascorbate and aldarate metabolism);00520(Amino sugar and nucleotide sugar metabolism)	K16190	EC:2.7.1.43	bHLH	PREDICTED: transcription factor ABORTED MICROSPORES-like [Pyrus x bretschneideri]	mrna	0	0.123593	0.073117	1.07956	1.67141	1.05774	0.0516474	-4.27516	5.38515e-10	2.08453e-09	down	yes
EVM0029576	EVM0029576		EVM0029576.1	GO:0003677(DNA binding);GO:0003700(DNA binding transcription factor activity);GO:0005634(nucleus);GO:0006351(transcription, DNA-templated);GO:0006355(regulation of transcription, DNA-templated);GO:0010374(stomatal complex development);GO:0046983(protein dimerization activity)	04016(MAPK signaling pathway - plant)	K20558		bHLH	PREDICTED: transcription factor SPEECHLESS-like [Pyrus x bretschneideri]	mrna	0.228008	0.752138	0.675281	2.7994	4.07278	3.73119	0.156123	-2.67925	6.85828e-10	2.63425e-09	down	yes
EVM0040969	EVM0040969		EVM0040969.1	GO:0003677(DNA binding);GO:0003700(DNA binding transcription factor activity);GO:0005515(protein binding);GO:0005634(nucleus);GO:0006351(transcription, DNA-templated);GO:0006355(regulation of transcription, DNA-templated);GO:0006952(defense response);GO:0009718(anthocyanin-containing compound biosynthetic process);GO:0009753(response to jasmonic acid);GO:0043425(bHLH transcription factor binding)…	04016(MAPK signaling pathway - plant);04075(Plant hormone signal transduction)	K13422		bHLH	PREDICTED: transcription factor MYC2-like [Pyrus x bretschneideri]	mrna	28.844	18.8251	15.2928	9.21477	11.1475	8.35533	2.19245	1.13254	1.84555e-09	6.80804e-09	up	yes
EVM0007071	EVM0007071		EVM0007071.1	GO:0000977(RNA polymerase II regulatory region sequence-specific DNA binding);GO:0003700(DNA binding transcription factor activity);GO:0006357(regulation of transcription by RNA polymerase II);GO:0090575(RNA polymerase II transcription factor complex)				bHLH	hypothetical protein DVH24_039584 [Malus domestica]	mrna	1.81816	2.77906	2.39659	0	0.215189	0	32.5008	5.0224	3.0328e-09	1.09833e-08	up	yes
EVM0041036	EVM0041036		EVM0041036.1	GO:0003677(DNA binding);GO:0003700(DNA binding transcription factor activity);GO:0005515(protein binding);GO:0005634(nucleus);GO:0006351(transcription, DNA-templated);GO:0009269(response to desiccation);GO:0009611(response to wounding);GO:0009737(response to abscisic acid);GO:0009738(abscisic acid-activated signaling pathway);GO:0009753(response to jasmonic acid);GO:0009867(jasmonic acid mediated…	04016(MAPK signaling pathway - plant);04075(Plant hormone signal transduction)	K13422		bHLH	PREDICTED: transcription factor MYC4-like [Pyrus x bretschneideri]	mrna	0.335029	0.275295	0.139163	1.53005	1.40917	1.46452	0.170194	-2.55475	8.50821e-09	2.97153e-08	down	yes
EVM0022360	EVM0022360		EVM0022360.1	GO:0003677(DNA binding);GO:0003700(DNA binding transcription factor activity);GO:0005515(protein binding);GO:0005634(nucleus);GO:0006351(transcription, DNA-templated);GO:0006355(regulation of transcription, DNA-templated);GO:0009555(pollen development);GO:0046983(protein dimerization activity);GO:0048658(anther wall tapetum development);GO:0052543(callose deposition in cell wall)	04016(MAPK signaling pathway - plant);04075(Plant hormone signal transduction)	K13422		bHLH	PREDICTED: transcription factor bHLH10-like [Pyrus x bretschneideri]	mrna	0.128151	0.126175	0.096712	1.06684	1.43303	0.669013	0.110777	-3.17428	1.49946e-08	5.13068e-08	down	yes
EVM0006710	EVM0006710		EVM0006710.1	GO:0003677(DNA binding);GO:0003700(DNA binding transcription factor activity);GO:0005634(nucleus);GO:0006351(transcription, DNA-templated);GO:0006355(regulation of transcription, DNA-templated);GO:0046983(protein dimerization activity)	04016(MAPK signaling pathway - plant);04075(Plant hormone signal transduction)	K13422		bHLH	hypothetical protein DVH24_014540 [Malus domestica]	mrna	0.490156	0.79673	0.475794	0	0	0	5875.6	12.5205	1.59944e-08	5.45474e-08	up	yes
EVM0042405	EVM0042405		EVM0042405.1	GO:0003677(DNA binding);GO:0003700(DNA binding transcription factor activity);GO:0005634(nucleus);GO:0006351(transcription, DNA-templated);GO:0006355(regulation of transcription, DNA-templated);GO:0009555(pollen development);GO:0046983(protein dimerization activity);GO:0048658(anther wall tapetum development);GO:0052543(callose deposition in cell wall)	04016(MAPK signaling pathway - plant);04075(Plant hormone signal transduction)	K13422		bHLH	PREDICTED: transcription factor bHLH91-like [Pyrus x bretschneideri]	mrna	0.762389	1.17748	1.22369	0.112917	0.228794	0.038941	8.31089	3.055	1.84961e-08	6.27751e-08	up	yes
EVM0003576	EVM0003576		EVM0003576.1	GO:0003677(DNA binding);GO:0003700(DNA binding transcription factor activity);GO:0005515(protein binding);GO:0005634(nucleus);GO:0006351(transcription, DNA-templated);GO:0006355(regulation of transcription, DNA-templated);GO:0009637(response to blue light);GO:0040008(regulation of growth);GO:0046983(protein dimerization activity)				bHLH	hypothetical protein DVH24_020556 [Malus domestica]	mrna	1.7407	1.22082	1.56653	4.63157	5.39009	3.70525	0.329866	-1.60005	1.93814e-08	6.56718e-08	down	yes
EVM0015065	EVM0015065		EVM0015065.1	GO:0003677(DNA binding);GO:0003700(DNA binding transcription factor activity);GO:0005634(nucleus);GO:0006351(transcription, DNA-templated);GO:0006355(regulation of transcription, DNA-templated);GO:0046983(protein dimerization activity)	04016(MAPK signaling pathway - plant);04075(Plant hormone signal transduction)	K13422		bHLH	PREDICTED: transcription factor bHLH18-like isoform X2 [Malus domestica]	mrna	0.480966	0.783577	0.478094	0	0	0	5808.79	12.504	2.0068e-08	6.78936e-08	up	yes
EVM0024391	EVM0024391		EVM0024391.1	GO:0003677(DNA binding);GO:0003700(DNA binding transcription factor activity);GO:0005634(nucleus);GO:0006351(transcription, DNA-templated);GO:0006355(regulation of transcription, DNA-templated);GO:0046983(protein dimerization activity)	04016(MAPK signaling pathway - plant);04075(Plant hormone signal transduction)	K13422		bHLH	PREDICTED: transcription factor bHLH18-like [Pyrus x bretschneideri]	mrna	0.120761	0.081385	0.266275	1.52535	1.58993	1.3512	0.104875	-3.25326	3.05123e-08	1.01551e-07	down	yes
EVM0000328	EVM0000328		EVM0000328.1	GO:0003677(DNA binding);GO:0003700(DNA binding transcription factor activity);GO:0005515(protein binding);GO:0005634(nucleus);GO:0006351(transcription, DNA-templated);GO:0006355(regulation of transcription, DNA-templated);GO:0016021(integral component of membrane);GO:0046983(protein dimerization activity)				bHLH	PREDICTED: transcription factor bHLH96-like [Pyrus x bretschneideri]	mrna	17.0366	6.86218	8.23393	46.0149	41.1579	43.6473	0.245626	-2.02547	2.76237e-06	7.64808e-06	down	yes
EVM0035103	EVM0035103		EVM0035103.1	GO:0003677(DNA binding);GO:0003700(DNA binding transcription factor activity);GO:0005634(nucleus);GO:0006351(transcription, DNA-templated);GO:0006355(regulation of transcription, DNA-templated);GO:0046983(protein dimerization activity)	04016(MAPK signaling pathway - plant);04075(Plant hormone signal transduction)	K13422		bHLH	PREDICTED: transcription factor bHLH30 [Pyrus x bretschneideri]	mrna	0.947976	0.941144	0.335433	2.55305	2.51603	2.75784	0.284218	-1.81493	5.21561e-06	1.40408e-05	down	yes
EVM0008649	EVM0008649		EVM0008649.1	GO:0003677(DNA binding);GO:0003700(DNA binding transcription factor activity);GO:0005634(nucleus);GO:0006351(transcription, DNA-templated);GO:0006355(regulation of transcription, DNA-templated);GO:0046983(protein dimerization activity)	04016(MAPK signaling pathway - plant);04075(Plant hormone signal transduction)	K13422		bHLH	PREDICTED: transcription factor bHLH18-like [Pyrus x bretschneideri]	mrna	0.642479	0.176301	0.384545	0	0	0	4011.08	11.9698	6.00067e-06	1.60453e-05	up	yes
EVM0029199	EVM0029199		EVM0029199.1	GO:0005634(nucleus)				bHLH	PREDICTED: transcription factor bHLH137-like [Pyrus x bretschneideri]	mrna	0	0	0.228141	1.77583	1.40092	2.43035	0.0406878	-4.61926	1.11927e-05	2.90487e-05	down	yes
EVM0037210	EVM0037210		EVM0037210.1	GO:0005634(nucleus);GO:0005737(cytoplasm);GO:0006351(transcription, DNA-templated);GO:0006355(regulation of transcription, DNA-templated);GO:0009416(response to light stimulus);GO:0040008(regulation of growth);GO:0046983(protein dimerization activity)				bHLH	PREDICTED: transcription factor PRE6-like [Pyrus x bretschneideri]	mrna	4.77889	5.86424	7.60553	12.0421	17.3935	21.5633	0.357824	-1.48268	2.04384e-05	5.14954e-05	down	yes
EVM0029874	EVM0029874		EVM0029874.1	GO:0000978(RNA polymerase II proximal promoter sequence-specific DNA binding);GO:0003677(DNA binding);GO:0003682(chromatin binding);GO:0003700(DNA binding transcription factor activity);GO:0005515(protein binding);GO:0005634(nucleus);GO:0006351(transcription, DNA-templated);GO:0006355(regulation of transcription, DNA-templated);GO:0009555(pollen development);GO:0046983(protein dimerization activi…	00040(Pentose and glucuronate interconversions);00053(Ascorbate and aldarate metabolism);00520(Amino sugar and nucleotide sugar metabolism)	K16190	EC:2.7.1.43	bHLH	PREDICTED: transcription factor ABORTED MICROSPORES-like [Pyrus x bretschneideri]	mrna	0.425403	0.345615	1.4705	0	0.042652	0	52.5536	5.71572	2.56841e-05	6.40624e-05	up	yes
EVM0027200	EVM0027200		EVM0027200.1	GO:0003677(DNA binding);GO:0003700(DNA binding transcription factor activity);GO:0005515(protein binding);GO:0005634(nucleus);GO:0006351(transcription, DNA-templated);GO:0006355(regulation of transcription, DNA-templated);GO:0009637(response to blue light);GO:0040008(regulation of growth);GO:0046983(protein dimerization activity)				bHLH	hypothetical protein DVH24_020556 [Malus domestica]	mrna	1.99371	1.78851	1.41799	6.32922	2.88294	5.50087	0.353442	-1.50045	2.93328e-05	7.26962e-05	down	yes
EVM0041966	EVM0041966		EVM0041966.1	GO:0000977(RNA polymerase II regulatory region sequence-specific DNA binding);GO:0003700(DNA binding transcription factor activity);GO:0006357(regulation of transcription by RNA polymerase II);GO:0090575(RNA polymerase II transcription factor complex)				bHLH	PREDICTED: transcription factor bHLH55-like [Pyrus x bretschneideri]	mrna	0.955433	1.90988	5.48322	21.3959	25.3015	20.681	0.123905	-3.01269	4.59158e-05	0.000111314	down	yes
EVM0030210	EVM0030210		EVM0030210.1	GO:0005634(nucleus)				bHLH	PREDICTED: transcription factor bHLH94-like [Pyrus x bretschneideri]	mrna	26.7701	11.7566	10.4005	5.95784	3.64913	4.93042	3.36562	1.75087	6.20028e-05	0.00014798	up	yes
EVM0006412	EVM0006412		EVM0006412.1	GO:0003677(DNA binding);GO:0003700(DNA binding transcription factor activity);GO:0005634(nucleus);GO:0006351(transcription, DNA-templated);GO:0006355(regulation of transcription, DNA-templated);GO:0043565(sequence-specific DNA binding);GO:0046983(protein dimerization activity);GO:0048658(anther wall tapetum development)				bHLH	PREDICTED: transcription factor DYT1 [Pyrus x bretschneideri]	mrna	0	0	0	0.359964	0.459158	0.53517	0.000221518	-12.1403	9.29338e-05	0.000216947	down	yes
EVM0018718	EVM0018718		EVM0018718.1	GO:0005634(nucleus);GO:0005737(cytoplasm);GO:0006351(transcription, DNA-templated);GO:0006355(regulation of transcription, DNA-templated);GO:0009416(response to light stimulus);GO:0040008(regulation of growth);GO:0046983(protein dimerization activity)				bHLH	PREDICTED: transcription factor PRE6-like [Malus domestica]	mrna	1.11802	1.53846	1.11887	5.53385	3.86697	4.59032	0.269839	-1.88983	0.000112796	0.000260748	down	yes
EVM0001007	EVM0001007		EVM0001007.1	GO:0003677(DNA binding);GO:0003700(DNA binding transcription factor activity);GO:0005515(protein binding);GO:0005634(nucleus);GO:0006351(transcription, DNA-templated);GO:0006355(regulation of transcription, DNA-templated);GO:0010039(response to iron ion);GO:0034756(regulation of iron ion transport);GO:0046983(protein dimerization activity);GO:0071281(cellular response to iron ion);GO:0071369(cell…	04016(MAPK signaling pathway - plant);04075(Plant hormone signal transduction)	K13422		bHLH	PREDICTED: transcription factor FER-LIKE IRON DEFICIENCY-INDUCED TRANSCRIPTION FACTOR-like [Pyrus x bretschneideri]	mrna	0.367455	0.19336	0.168262	0	0	0	2430.26	11.2469	0.00016366	0.000370583	up	yes
EVM0008680	EVM0008680		EVM0008680.1	GO:0003677(DNA binding);GO:0003700(DNA binding transcription factor activity);GO:0005515(protein binding);GO:0005634(nucleus);GO:0006351(transcription, DNA-templated);GO:0006355(regulation of transcription, DNA-templated);GO:0009555(pollen development);GO:0046983(protein dimerization activity);GO:0048658(anther wall tapetum development);GO:0052543(callose deposition in cell wall)	04016(MAPK signaling pathway - plant);04075(Plant hormone signal transduction)	K13422		bHLH	PREDICTED: transcription factor bHLH10-like [Pyrus x bretschneideri]	mrna	0.578175	0.470389	0.3488	1.50526	1.61196	1.00774	0.338759	-1.56167	0.000320783	0.000700694	down	yes
EVM0025862	EVM0025862		EVM0025862.1	GO:0005634(nucleus);GO:0005737(cytoplasm);GO:0006351(transcription, DNA-templated);GO:0006355(regulation of transcription, DNA-templated);GO:0009416(response to light stimulus);GO:0040008(regulation of growth);GO:0046983(protein dimerization activity)				bHLH	hypothetical protein DVH24_023814 [Malus domestica]	mrna	8.44045	16.1454	5.40534	20.7625	37.4746	16.9163	0.399066	-1.3253	0.00312142	0.00593804	down	yes
EVM0008480	EVM0008480		EVM0008480.1	GO:0003677(DNA binding);GO:0003700(DNA binding transcription factor activity);GO:0005634(nucleus);GO:0006351(transcription, DNA-templated);GO:0006355(regulation of transcription, DNA-templated);GO:0010500(transmitting tissue development);GO:0046983(protein dimerization activity);GO:0048462(carpel formation);GO:0048467(gynoecium development);GO:0080126(ovary septum development)				bHLH	PREDICTED: transcription factor HEC2-like [Pyrus x bretschneideri]	mrna	0.684241	0.919937	0.830129	0.324496	0.245822	0.19921	3.16338	1.66147	0.00368385	0.00693121	up	yes
EVM0031210	EVM0031210		EVM0031210.1	GO:0000977(RNA polymerase II regulatory region sequence-specific DNA binding);GO:0003700(DNA binding transcription factor activity);GO:0006357(regulation of transcription by RNA polymerase II);GO:0090575(RNA polymerase II transcription factor complex)				bHLH	hypothetical protein DVH24_024650 [Malus domestica]	mrna	0	0.43868	0.545253	0	0	0	3279.78	11.6794	0.0039129	0.0073333	up	yes
EVM0018797	EVM0018797		EVM0018797.1	GO:0003677(DNA binding);GO:0003700(DNA binding transcription factor activity);GO:0005515(protein binding);GO:0005634(nucleus);GO:0006351(transcription, DNA-templated);GO:0010052(guard cell differentiation);GO:0010377(guard cell fate commitment);GO:0010444(guard mother cell differentiation);GO:0045597(positive regulation of cell differentiation);GO:0045893(positive regulation of transcription, DNA…	04016(MAPK signaling pathway - plant)	K20558		bHLH	PREDICTED: transcription factor FAMA isoform X2 [Pyrus x bretschneideri]	mrna	0.140355	0.074606	0.530067	1.25314	0.949384	0.937142	0.237295	-2.07525	0.00392796	0.00735707	down	yes
EVM0000004	EVM0000004		EVM0000004.1	GO:0003677(DNA binding);GO:0003700(DNA binding transcription factor activity);GO:0005515(protein binding);GO:0005634(nucleus);GO:0006351(transcription, DNA-templated);GO:0006355(regulation of transcription, DNA-templated);GO:0046983(protein dimerization activity)				bHLH	PREDICTED: transcription factor BEE 3-like [Pyrus x bretschneideri]	mrna	0.721656	0.354615	0.77909	0	0	0.197473	9.39552	3.23197	0.00703172	0.0126163	up	yes
EVM0038342	EVM0038342		EVM0038342.1	GO:0000978(RNA polymerase II proximal promoter sequence-specific DNA binding);GO:0003677(DNA binding);GO:0003682(chromatin binding);GO:0003700(DNA binding transcription factor activity);GO:0005515(protein binding);GO:0005634(nucleus);GO:0006351(transcription, DNA-templated);GO:0006355(regulation of transcription, DNA-templated);GO:0009555(pollen development);GO:0046983(protein dimerization activi…	00040(Pentose and glucuronate interconversions);00053(Ascorbate and aldarate metabolism);00520(Amino sugar and nucleotide sugar metabolism)	K16190	EC:2.7.1.43	bHLH	PREDICTED: LOW QUALITY PROTEIN: transcription factor ABORTED MICROSPORES-like [Pyrus x bretschneideri]	mrna	0.086019	0	0.336055	1.47345	2.71401	1.89582	0.0693826	-3.84928	0.0089479	0.0157599	down	yes
EVM0012452	EVM0012452		EVM0012452.1	GO:0001046(core promoter sequence-specific DNA binding);GO:0001228(transcriptional activator activity, RNA polymerase II transcription regulatory region sequence-specific DNA binding);GO:0005634(nucleus);GO:0006366(transcription by RNA polymerase II)	04075(Plant hormone signal transduction);04712(Circadian rhythm - plant)	K12126		bHLH	PREDICTED: putative transcription factor bHLH086 [Pyrus x bretschneideri]	mrna	0.424862	0.162773	0	0	0	0	1958.78	10.9357	0.0106617	0.0185142	up	yes
EVM0010406	EVM0010406		EVM0010406.1	GO:0003677(DNA binding);GO:0003700(DNA binding transcription factor activity);GO:0005634(nucleus);GO:0006351(transcription, DNA-templated);GO:0006355(regulation of transcription, DNA-templated);GO:0046983(protein dimerization activity)	04016(MAPK signaling pathway - plant);04075(Plant hormone signal transduction)	K13422		bHLH	PREDICTED: transcription factor bHLH18-like [Pyrus x bretschneideri]	mrna	0.417578	0.449949	0.130473	0	0.094512	0.065889	6.22191	2.63736	0.0117263	0.0202019	up	yes
EVM0005062	EVM0005062		EVM0005062.1	GO:0000977(RNA polymerase II regulatory region sequence-specific DNA binding);GO:0003700(DNA binding transcription factor activity);GO:0006357(regulation of transcription by RNA polymerase II);GO:0090575(RNA polymerase II transcription factor complex)				bHLH	hypothetical protein DVH24_008742 [Malus domestica]	mrna	1.49443	0.516642	0.745031	0	0.255939	0.370269	4.40126	2.13792	0.0155958	0.026253	up	yes
EVM0024133	EVM0024133		EVM0024133.1	GO:0003677(DNA binding);GO:0003700(DNA binding transcription factor activity);GO:0005634(nucleus);GO:0006351(transcription, DNA-templated);GO:0006355(regulation of transcription, DNA-templated);GO:0009506(plasmodesma);GO:0009567(double fertilization forming a zygote and endosperm);GO:0046983(protein dimerization activity)	04075(Plant hormone signal transduction)	K16189		bHLH	PREDICTED: transcription factor PIF7-like isoform X1 [Pyrus x bretschneideri]	mrna	0	0.104691	0.119341	0.140116	0.477155	0.72703	0.166653	-2.58508	0.0235625	0.0383774	down	yes
EVM0019622	EVM0019622		EVM0019622.1	GO:0003677(DNA binding);GO:0003700(DNA binding transcription factor activity);GO:0005634(nucleus);GO:0006351(transcription, DNA-templated);GO:0006355(regulation of transcription, DNA-templated);GO:0010200(response to chitin);GO:0046983(protein dimerization activity)				bHLH	PREDICTED: LOW QUALITY PROTEIN: putative transcription factor bHLH041 [Pyrus x bretschneideri]	mrna	0	0	0	0.160598	0.086679	0	0.00121321	-9.68695	0.0290873	0.0466541	down	yes
EVM0026513	EVM0026513		EVM0026513.1	GO:0003677(DNA binding);GO:0003700(DNA binding transcription factor activity);GO:0005515(protein binding);GO:0005634(nucleus);GO:0006351(transcription, DNA-templated);GO:0006355(regulation of transcription, DNA-templated);GO:0009845(seed germination);GO:0043565(sequence-specific DNA binding);GO:0044212(transcription regulatory region DNA binding);GO:0046982(protein heterodimerization activity)				bZIP	PREDICTED: bZIP transcription factor 11-like isoform X1 [Pyrus x bretschneideri]	mrna	132.861	130.383	131.764	36.6641	34.8553	33.4366	3.76355	1.91209	1.8628e-165	4.0838e-163	up	yes
EVM0026524	EVM0026524		EVM0026524.1	GO:0003723(RNA binding);GO:0004519(endonuclease activity);GO:0005739(mitochondrion);GO:0080156(mitochondrial mRNA modification)				bZIP	hypothetical protein DVH24_036773 [Malus domestica]	mrna	16.9067	16.4709	14.8384	1.5479	1.8098	1.8808	9.20415	3.20228	1.2537e-157	2.4722e-155	up	yes
EVM0039176	EVM0039176		EVM0039176.1	GO:0000976(transcription regulatory region sequence-specific DNA binding);GO:0000977(RNA polymerase II regulatory region sequence-specific DNA binding);GO:0003677(DNA binding);GO:0003700(DNA binding transcription factor activity);GO:0005515(protein binding);GO:0005634(nucleus);GO:0006351(transcription, DNA-templated);GO:0006355(regulation of transcription, DNA-templated);GO:0009414(response to wa…	04075(Plant hormone signal transduction)	K14432		bZIP	PREDICTED: ABSCISIC ACID-INSENSITIVE 5-like protein 5 isoform X1 [Pyrus x bretschneideri]	mrna	101.891	103.555	111.89	16.3274	17.6417	13.5266	6.68136	2.74014	1.0629e-145	1.7527e-143	up	yes
EVM0007307	EVM0007307		EVM0007307.1	GO:0003677(DNA binding);GO:0003700(DNA binding transcription factor activity);GO:0005515(protein binding);GO:0005634(nucleus);GO:0006351(transcription, DNA-templated);GO:0045735(nutrient reservoir activity);GO:0045893(positive regulation of transcription, DNA-templated);GO:0046982(protein heterodimerization activity);GO:2000693(positive regulation of seed maturation)				bZIP	PREDICTED: light-inducible protein CPRF2-like isoform X1 [Pyrus x bretschneideri]	mrna	94.9424	103.137	105.538	20.0464	22.648	19.4817	4.88319	2.28782	2.4004e-141	3.6514e-139	up	yes
EVM0042575	EVM0042575		EVM0042575.1	GO:0003677(DNA binding);GO:0003700(DNA binding transcription factor activity);GO:0005515(protein binding);GO:0005634(nucleus);GO:0006351(transcription, DNA-templated);GO:0006355(regulation of transcription, DNA-templated);GO:0009845(seed germination);GO:0043565(sequence-specific DNA binding);GO:0044212(transcription regulatory region DNA binding);GO:0046982(protein heterodimerization activity)				bZIP	BZIP domain class transcription factor [Malus domestica]	mrna	1.98936	2.26135	2.70285	37.6767	36.0756	34.5698	0.0641933	-3.96143	3.75166e-93	2.39419e-91	down	yes
EVM0026808	EVM0026808		EVM0026808.1	GO:0003677(DNA binding);GO:0003700(DNA binding transcription factor activity);GO:0005515(protein binding);GO:0005634(nucleus);GO:0006351(transcription, DNA-templated);GO:0045735(nutrient reservoir activity);GO:0045893(positive regulation of transcription, DNA-templated);GO:0046982(protein heterodimerization activity);GO:2000693(positive regulation of seed maturation)				bZIP	PREDICTED: light-inducible protein CPRF2-like isoform X1 [Pyrus x bretschneideri]	mrna	37.3821	40.9598	38.9286	6.61895	8.75647	8.01163	5.01434	2.32606	2.52525e-87	1.4238e-85	up	yes
EVM0034800	EVM0034800		EVM0034800.1	GO:0000977(RNA polymerase II regulatory region sequence-specific DNA binding);GO:0003700(DNA binding transcription factor activity);GO:0005515(protein binding);GO:0005634(nucleus);GO:0005829(cytosol);GO:0006351(transcription, DNA-templated);GO:0006355(regulation of transcription, DNA-templated);GO:0009737(response to abscisic acid);GO:0043565(sequence-specific DNA binding);GO:0044212(transcriptio…				bZIP	PREDICTED: common plant regulatory factor 1 isoform X2 [Pyrus x bretschneideri]	mrna	28.5387	30.9425	29.1504	6.59933	8.10822	7.59785	3.97355	1.99043	1.30625e-84	6.97457e-83	up	yes
EVM0032489	EVM0032489		EVM0032489.1	GO:0002376(immune system process);GO:0003677(DNA binding);GO:0003700(DNA binding transcription factor activity);GO:0005634(nucleus);GO:0005789(endoplasmic reticulum membrane);GO:0006351(transcription, DNA-templated);GO:0006355(regulation of transcription, DNA-templated);GO:0010200(response to chitin);GO:0016021(integral component of membrane);GO:0030968(endoplasmic reticulum unfolded protein resp…				bZIP	putative bZIP transcription 60 [Pyrus pyrifolia]	mrna	291.812	276.686	299.955	58.8638	73.9146	77.6025	4.128	2.04544	2.05442e-84	1.0938e-82	up	yes
EVM0030455	EVM0030455		EVM0030455.1	GO:0001228(transcriptional activator activity, RNA polymerase II transcription regulatory region sequence-specific DNA binding);GO:0003677(DNA binding);GO:0003700(DNA binding transcription factor activity);GO:0005515(protein binding);GO:0005634(nucleus);GO:0006351(transcription, DNA-templated);GO:0006355(regulation of transcription, DNA-templated);GO:0042802(identical protein binding);GO:0046982(…				bZIP	PREDICTED: light-inducible protein CPRF2-like [Malus domestica]	mrna	11.8215	15.3832	14.7811	1.26768	1.52484	1.13606	10.6873	3.41782	1.912e-78	9.04292e-77	up	yes
EVM0030931	EVM0030931		EVM0030931.1	GO:0000139(Golgi membrane);GO:0003677(DNA binding);GO:0003700(DNA binding transcription factor activity);GO:0005515(protein binding);GO:0005634(nucleus);GO:0005783(endoplasmic reticulum);GO:0005789(endoplasmic reticulum membrane);GO:0006351(transcription, DNA-templated);GO:0006355(regulation of transcription, DNA-templated);GO:0016021(integral component of membrane);GO:0042538(hyperosmotic salini…	03013(RNA transport)	K03248		bZIP	PREDICTED: bZIP transcription factor 17-like, partial [Pyrus x bretschneideri]	mrna	28.9624	29.0388	28.7825	11.7778	11.4877	9.61404	2.63945	1.40024	2.99728e-53	7.53749e-52	up	yes
EVM0020397	EVM0020397		EVM0020397.1	GO:0004683(calmodulin-dependent protein kinase activity);GO:0005516(calmodulin binding);GO:0005634(nucleus);GO:0005737(cytoplasm);GO:0009738(abscisic acid-activated signaling pathway);GO:0009931(calcium-dependent protein serine/threonine kinase activity);GO:0018105(peptidyl-serine phosphorylation);GO:0035556(intracellular signal transduction);GO:0046777(protein autophosphorylation)	04075(Plant hormone signal transduction)	K14431		bZIP	PREDICTED: transcription factor TGA2.3-like [Pyrus x bretschneideri]	mrna	32.4079	31.3491	31.9998	15.5238	13.7861	13.123	2.25666	1.17419	4.62444e-45	9.11414e-44	up	yes
EVM0014725	EVM0014725		EVM0014725.1	GO:0003677(DNA binding);GO:0003700(DNA binding transcription factor activity);GO:0005515(protein binding);GO:0005634(nucleus);GO:0006355(regulation of transcription, DNA-templated)				bZIP	PREDICTED: transcriptional activator hacA-like [Pyrus x bretschneideri]	mrna	26.6643	23.0158	27.288	5.50773	8.17616	6.50984	3.81149	1.93035	1.42015e-40	2.42675e-39	up	yes
EVM0033502	EVM0033502		EVM0033502.1	GO:0000977(RNA polymerase II regulatory region sequence-specific DNA binding);GO:0003677(DNA binding);GO:0003700(DNA binding transcription factor activity);GO:0005515(protein binding);GO:0005516(calmodulin binding);GO:0005634(nucleus);GO:0006351(transcription, DNA-templated);GO:0006355(regulation of transcription, DNA-templated);GO:0009409(response to cold);GO:0042742(defense response to bacteriu…	04075(Plant hormone signal transduction)	K14431		bZIP	PREDICTED: transcription factor TGA4-like isoform X4 [Pyrus x bretschneideri]	mrna	12.298	11.6708	11.1141	1.72503	1.68099	2.68342	5.76128	2.52639	2.45907e-37	3.77459e-36	up	yes
EVM0032006	EVM0032006		EVM0032006.1	GO:0004683(calmodulin-dependent protein kinase activity);GO:0005516(calmodulin binding);GO:0005634(nucleus);GO:0005737(cytoplasm);GO:0009738(abscisic acid-activated signaling pathway);GO:0009931(calcium-dependent protein serine/threonine kinase activity);GO:0018105(peptidyl-serine phosphorylation);GO:0035556(intracellular signal transduction);GO:0046777(protein autophosphorylation)	04075(Plant hormone signal transduction)	K14431		bZIP	hypothetical protein DVH24_019745 [Malus domestica]	mrna	40.1332	47.9667	42.6769	20.1795	20.2687	18.6684	2.21218	1.14547	5.20087e-35	7.33653e-34	up	yes
EVM0041928	EVM0041928		EVM0041928.1	GO:0003677(DNA binding);GO:0003700(DNA binding transcription factor activity);GO:0005515(protein binding);GO:0005634(nucleus);GO:0006351(transcription, DNA-templated);GO:0006355(regulation of transcription, DNA-templated);GO:0006971(hypotonic response);GO:0009267(cellular response to starvation);GO:0043565(sequence-specific DNA binding);GO:0045735(nutrient reservoir activity);GO:0045893(positive …				bZIP	PREDICTED: bZIP transcription factor 53-like [Pyrus x bretschneideri]	mrna	239.37	215.018	224.534	100.351	120.08	111.166	2.04743	1.03382	1.23993e-33	1.67918e-32	up	yes
EVM0004317	EVM0004317		EVM0004317.1	GO:0003700(DNA binding transcription factor activity);GO:0005634(nucleus)	04016(MAPK signaling pathway - plant)	K20557		bZIP	hypothetical protein DVH24_030611 [Malus domestica]	mrna	26.5581	33.2767	32.852	13.7008	14.8248	12.2796	2.27145	1.18361	3.58663e-23	3.12605e-22	up	yes
EVM0009279	EVM0009279		EVM0009279.1	GO:0003677(DNA binding);GO:0003700(DNA binding transcription factor activity);GO:0005515(protein binding);GO:0005634(nucleus);GO:0006351(transcription, DNA-templated);GO:0006355(regulation of transcription, DNA-templated);GO:0009507(chloroplast);GO:0043565(sequence-specific DNA binding)	04075(Plant hormone signal transduction)	K14432		bZIP	hypothetical protein DVH24_016447 [Malus domestica]	mrna	9.16737	8.94067	8.63049	2.67577	2.41905	1.78323	3.88752	1.95885	4.16703e-23	3.62007e-22	up	yes
EVM0008182	EVM0008182		EVM0008182.1	GO:0000977(RNA polymerase II regulatory region sequence-specific DNA binding);GO:0003677(DNA binding);GO:0003690(double-stranded DNA binding);GO:0003700(DNA binding transcription factor activity);GO:0005515(protein binding);GO:0005634(nucleus);GO:0006351(transcription, DNA-templated);GO:0006355(regulation of transcription, DNA-templated);GO:0009585(red, far-red light phototransduction);GO:0009640…	04712(Circadian rhythm - plant)	K16241		bZIP	PREDICTED: transcription factor HY5-like isoform X2 [Pyrus x bretschneideri]	mrna	4.01781	5.3778	4.89429	21.0174	19.538	17.3545	0.246761	-2.01881	1.04799e-20	8.1285e-20	down	yes
EVM0002698	EVM0002698		EVM0002698.1	GO:0003700(DNA binding transcription factor activity);GO:0005515(protein binding);GO:0005516(calmodulin binding);GO:0005634(nucleus);GO:0006351(transcription, DNA-templated);GO:0006355(regulation of transcription, DNA-templated);GO:0042742(defense response to bacterium);GO:0043565(sequence-specific DNA binding)	04075(Plant hormone signal transduction)	K14431		bZIP	hypothetical protein DVH24_042646 [Malus domestica]	mrna	12.1625	9.39708	9.38885	4.41591	3.76068	4.55473	2.43089	1.28149	2.7379e-15	1.55879e-14	up	yes
EVM0000329	EVM0000329		EVM0000329.1	GO:0000977(RNA polymerase II regulatory region sequence-specific DNA binding);GO:0003677(DNA binding);GO:0003700(DNA binding transcription factor activity);GO:0005634(nucleus);GO:0009555(pollen development);GO:0045893(positive regulation of transcription, DNA-templated)	04141(Protein processing in endoplasmic reticulum)	K04374		bZIP	PREDICTED: basic leucine zipper 34-like [Pyrus x bretschneideri]	mrna	0.308508	0.152162	0.316024	2.69049	2.39159	2.37129	0.104207	-3.26247	3.05059e-14	1.62047e-13	down	yes
EVM0000485	EVM0000485		EVM0000485.1	GO:0003677(DNA binding);GO:0003700(DNA binding transcription factor activity);GO:0005515(protein binding);GO:0005634(nucleus);GO:0006351(transcription, DNA-templated);GO:0006355(regulation of transcription, DNA-templated);GO:0009845(seed germination);GO:0043565(sequence-specific DNA binding);GO:0044212(transcription regulatory region DNA binding);GO:0046982(protein heterodimerization activity)				bZIP	BZIP domain class transcription factor [Malus domestica]	mrna	6.45105	7.45511	8.96292	22.561	23.6077	20.6725	0.34214	-1.54734	1.54459e-13	7.82884e-13	down	yes
EVM0033949	EVM0033949		EVM0033949.1	GO:0000977(RNA polymerase II regulatory region sequence-specific DNA binding);GO:0003677(DNA binding);GO:0003700(DNA binding transcription factor activity);GO:0005634(nucleus);GO:0009555(pollen development);GO:0045893(positive regulation of transcription, DNA-templated)	04141(Protein processing in endoplasmic reticulum)	K04374		bZIP	PREDICTED: basic leucine zipper 34-like [Pyrus x bretschneideri]	mrna	0.224805	0.391275	0.378694	2.61147	2.13929	2.35927	0.139911	-2.83741	7.36755e-11	3.06795e-10	down	yes
EVM0041715	EVM0041715		EVM0041715.1	GO:0000977(RNA polymerase II regulatory region sequence-specific DNA binding);GO:0003700(DNA binding transcription factor activity);GO:0005515(protein binding);GO:0005634(nucleus);GO:0005829(cytosol);GO:0006351(transcription, DNA-templated);GO:0006355(regulation of transcription, DNA-templated);GO:0009737(response to abscisic acid);GO:0043565(sequence-specific DNA binding);GO:0044212(transcriptio…				bZIP	PREDICTED: common plant regulatory factor 1 isoform X2 [Pyrus x bretschneideri]	mrna	11.249	13.4212	11.8067	2.263	5.05466	5.15052	2.9256	1.54873	1.11386e-10	4.57438e-10	up	yes
EVM0037110	EVM0037110		EVM0037110.1	GO:0000977(RNA polymerase II regulatory region sequence-specific DNA binding);GO:0001228(transcriptional activator activity, RNA polymerase II transcription regulatory region sequence-specific DNA binding);GO:0003677(DNA binding);GO:0003700(DNA binding transcription factor activity);GO:0005515(protein binding);GO:0005634(nucleus);GO:0006351(transcription, DNA-templated);GO:0006355(regulation of t…				bZIP	PREDICTED: bZIP transcription factor 53-like [Malus domestica]	mrna	3.93831	3.7704	4.45132	15.6394	14.501	10.2798	0.30084	-1.73293	1.16702e-10	4.7832e-10	down	yes
EVM0033986	EVM0033986		EVM0033986.1	GO:0000977(RNA polymerase II regulatory region sequence-specific DNA binding);GO:0003677(DNA binding);GO:0003700(DNA binding transcription factor activity);GO:0005634(nucleus);GO:0009555(pollen development);GO:0045893(positive regulation of transcription, DNA-templated)	04141(Protein processing in endoplasmic reticulum)	K04374		bZIP	PREDICTED: basic leucine zipper 34-like [Pyrus x bretschneideri]	mrna	1.05678	0.487117	0.451905	4.04825	3.43846	3.83446	0.176289	-2.50398	2.19176e-10	8.77294e-10	down	yes
EVM0009525	EVM0009525		EVM0009525.1	GO:0003677(DNA binding);GO:0003700(DNA binding transcription factor activity);GO:0005515(protein binding);GO:0005634(nucleus);GO:0006351(transcription, DNA-templated);GO:0006355(regulation of transcription, DNA-templated);GO:0009507(chloroplast);GO:0043565(sequence-specific DNA binding)	04075(Plant hormone signal transduction)	K14432		bZIP	PREDICTED: G-box-binding factor 4-like [Pyrus x bretschneideri]	mrna	8.88499	9.36743	10.5991	3.13992	5.0137	2.78346	2.63796	1.39942	3.0863e-10	1.21924e-09	up	yes
EVM0030561	EVM0030561		EVM0030561.1	GO:0003677(DNA binding);GO:0003700(DNA binding transcription factor activity);GO:0005515(protein binding);GO:0005634(nucleus);GO:0006351(transcription, DNA-templated);GO:0006355(regulation of transcription, DNA-templated);GO:0009507(chloroplast);GO:0043565(sequence-specific DNA binding)	04075(Plant hormone signal transduction)	K14432		bZIP	hypothetical protein DVH24_016447 [Malus domestica]	mrna	4.41266	5.15728	4.33543	2.1752	1.48561	1.8701	2.51412	1.33005	2.28088e-08	7.67758e-08	up	yes
EVM0009738	EVM0009738		EVM0009738.1	GO:0000977(RNA polymerase II regulatory region sequence-specific DNA binding);GO:0003677(DNA binding);GO:0003700(DNA binding transcription factor activity);GO:0005634(nucleus);GO:0009555(pollen development);GO:0045893(positive regulation of transcription, DNA-templated)	04141(Protein processing in endoplasmic reticulum)	K04374		bZIP	PREDICTED: basic leucine zipper 34-like [Pyrus x bretschneideri]	mrna	0.050073	0.291408	0.157311	1.36459	1.58191	1.72948	0.106671	-3.22876	9.80621e-08	3.11301e-07	down	yes
EVM0003331	EVM0003331		EVM0003331.1	GO:0003677(DNA binding);GO:0003700(DNA binding transcription factor activity);GO:0005634(nucleus);GO:0006355(regulation of transcription, DNA-templated);GO:0042803(protein homodimerization activity);GO:0046982(protein heterodimerization activity)				bZIP	PREDICTED: basic leucine zipper 43-like [Pyrus x bretschneideri]	mrna	2.34558	0.725957	1.23827	0	0.089613	0.133656	19.3032	4.27077	1.26086e-06	3.60885e-06	up	yes
EVM0034328	EVM0034328		EVM0034328.1	GO:0005515(protein binding)	04075(Plant hormone signal transduction)	K14431		bZIP	PREDICTED: transcription factor TGA2.3-like, partial [Pyrus x bretschneideri]	mrna	0.490325	0.136902	0.56317	0.043967	0	0	27.0748	4.75888	2.54601e-05	6.35334e-05	up	yes
EVM0000806	EVM0000806		EVM0000806.1	GO:0005515(protein binding)	04075(Plant hormone signal transduction)	K14431		bZIP	hypothetical protein DVH24_019506 [Malus domestica]	mrna	0.469677	0.572793	0.654563	0	0.107255	0.084838	8.83443	3.14314	4.69971e-05	0.000113788	up	yes
EVM0035619	EVM0035619		EVM0035619.1					bZIP	PREDICTED: G-box-binding factor 1-like [Pyrus x bretschneideri]	mrna	1.23031	1.74167	1.67711	3.52637	4.55898	4.8316	0.359922	-1.47424	7.92315e-05	0.000186761	down	yes
EVM0040787	EVM0040787		EVM0040787.1	GO:0003677(DNA binding);GO:0003700(DNA binding transcription factor activity);GO:0005515(protein binding);GO:0005634(nucleus);GO:0005737(cytoplasm);GO:0006351(transcription, DNA-templated);GO:0006355(regulation of transcription, DNA-templated);GO:0006970(response to osmotic stress);GO:0009409(response to cold);GO:0009651(response to salt stress);GO:0042538(hyperosmotic salinity response);GO:00428…				bZIP	PREDICTED: basic leucine zipper 23 [Pyrus x bretschneideri]	mrna	1.08623	0.572851	1.1582	3.26051	2.62747	2.77117	0.325352	-1.61992	0.000310697	0.0006797	down	yes
EVM0000237	EVM0000237		EVM0000237.1	GO:0003677(DNA binding);GO:0003700(DNA binding transcription factor activity);GO:0005515(protein binding);GO:0005634(nucleus);GO:0006351(transcription, DNA-templated);GO:0006355(regulation of transcription, DNA-templated);GO:0009414(response to water deprivation);GO:0009651(response to salt stress);GO:0009737(response to abscisic acid);GO:0009738(abscisic acid-activated signaling pathway);GO:0009…	04075(Plant hormone signal transduction)	K14432		bZIP	PREDICTED: protein ABSCISIC ACID-INSENSITIVE 5 [Pyrus x bretschneideri]	mrna	1.68798	0.849647	1.40625	0.511228	0.601284	0.666481	2.21691	1.14855	0.000627653	0.00131771	up	yes
EVM0007131	EVM0007131		EVM0007131.1	GO:0003677(DNA binding);GO:0003700(DNA binding transcription factor activity);GO:0005515(protein binding);GO:0005634(nucleus);GO:0006355(regulation of transcription, DNA-templated);GO:0043565(sequence-specific DNA binding);GO:0044212(transcription regulatory region DNA binding)				bZIP	PREDICTED: bZIP transcription factor 2-like [Pyrus x bretschneideri]	mrna	3.04127	2.32071	1.50196	5.15193	4.87694	4.56218	0.470421	-1.08798	0.00407274	0.00761218	down	yes
EVM0007398	EVM0007398		EVM0007398.1	GO:0003677(DNA binding);GO:0003700(DNA binding transcription factor activity);GO:0005634(nucleus);GO:0006355(regulation of transcription, DNA-templated)				bZIP	PREDICTED: basic leucine zipper 43, partial [Pyrus x bretschneideri]	mrna	0	0	0	0.267468	0.182224	0.272867	0.000415191	-11.2339	0.0178165	0.0296867	down	yes
EVM0003721	EVM0003721		EVM0003721.1	GO:0005634(nucleus);GO:0009416(response to light stimulus);GO:0009909(regulation of flower development)	04712(Circadian rhythm - plant)	K12135		C2C2-CO-like	PREDICTED: zinc finger protein CONSTANS-LIKE 4-like [Pyrus x bretschneideri]	mrna	239.829	230.182	197.655	89.6773	91.0834	84.338	2.51856	1.3326	4.27301e-59	1.26189e-57	up	yes
EVM0000166	EVM0000166		EVM0000166.1	GO:0003700(DNA binding transcription factor activity);GO:0005515(protein binding);GO:0005634(nucleus);GO:0006355(regulation of transcription, DNA-templated);GO:0007623(circadian rhythm);GO:0008270(zinc ion binding);GO:0048579(negative regulation of long-day photoperiodism, flowering)	04712(Circadian rhythm - plant)	K12135		C2C2-CO-like	PREDICTED: zinc finger protein CONSTANS-LIKE 9 isoform X1 [Pyrus x bretschneideri]	mrna	27.7535	38.9197	34.5898	9.30687	8.92062	8.82892	3.74267	1.90407	4.33852e-46	8.92342e-45	up	yes
EVM0000714	EVM0000714		EVM0000714.1	GO:0003700(DNA binding transcription factor activity);GO:0005515(protein binding);GO:0005634(nucleus);GO:0006355(regulation of transcription, DNA-templated);GO:0008270(zinc ion binding)	04712(Circadian rhythm - plant)	K12135		C2C2-CO-like	PREDICTED: zinc finger protein CONSTANS-LIKE 14-like [Pyrus x bretschneideri]	mrna	24.1347	25.2422	21.9729	8.65671	6.59374	7.66233	3.11397	1.63876	1.42425e-40	2.43265e-39	up	yes
EVM0031482	EVM0031482		EVM0031482.1	GO:0003700(DNA binding transcription factor activity);GO:0005515(protein binding);GO:0005634(nucleus);GO:0006355(regulation of transcription, DNA-templated);GO:0007623(circadian rhythm);GO:0008270(zinc ion binding);GO:0048579(negative regulation of long-day photoperiodism, flowering)	04712(Circadian rhythm - plant)	K12135		C2C2-CO-like	hypothetical protein DVH24_032517 [Malus domestica]	mrna	43.8995	55.4665	47.7079	22.3635	20.0321	18.2086	2.4268	1.27905	4.87124e-30	5.75607e-29	up	yes
EVM0005774	EVM0005774		EVM0005774.1	GO:0005634(nucleus);GO:0009416(response to light stimulus);GO:0009909(regulation of flower development)	04712(Circadian rhythm - plant)	K12135		C2C2-CO-like	PREDICTED: zinc finger protein CONSTANS-LIKE 5-like [Malus domestica]	mrna	25.3486	31.0006	27.3772	65.2238	70.1955	59.3872	0.429793	-1.21829	1.91753e-22	1.61575e-21	down	yes
EVM0004858	EVM0004858		EVM0004858.1	GO:0005634(nucleus);GO:0009416(response to light stimulus);GO:0009909(regulation of flower development)	04712(Circadian rhythm - plant)	K12135		C2C2-CO-like	PREDICTED: zinc finger protein CONSTANS-LIKE 2 [Pyrus x bretschneideri]	mrna	1.19324	1.49171	0.754865	6.17375	7.25081	7.32017	0.165817	-2.59234	1.22873e-20	9.49479e-20	down	yes
EVM0022080	EVM0022080		EVM0022080.1	GO:0003700(DNA binding transcription factor activity);GO:0005515(protein binding);GO:0005634(nucleus);GO:0006355(regulation of transcription, DNA-templated);GO:0008270(zinc ion binding)				C2C2-CO-like	PREDICTED: zinc finger protein CONSTANS-LIKE 15-like isoform X1 [Pyrus x bretschneideri]	mrna	5.86607	4.76186	5.01443	1.62489	1.86665	1.07082	3.42856	1.7776	2.54619e-14	1.3599e-13	up	yes
EVM0032883	EVM0032883		EVM0032883.1	GO:0003700(DNA binding transcription factor activity);GO:0005634(nucleus);GO:0006355(regulation of transcription, DNA-templated);GO:0008270(zinc ion binding)	04712(Circadian rhythm - plant)	K12129		C2C2-CO-like	PREDICTED: zinc finger protein CONSTANS-LIKE 6-like [Pyrus x bretschneideri]	mrna	0	0	0	1.27994	1.69041	0.951477	7.64949e-05	-13.6743	2.0215e-12	9.47664e-12	down	yes
EVM0021208	EVM0021208		EVM0021208.1	GO:0003700(DNA binding transcription factor activity);GO:0005515(protein binding);GO:0005634(nucleus);GO:0006355(regulation of transcription, DNA-templated);GO:0008270(zinc ion binding);GO:0016020(membrane)	04712(Circadian rhythm - plant)	K12135		C2C2-CO-like	PREDICTED: zinc finger protein CONSTANS-LIKE 6-like [Pyrus x bretschneideri]	mrna	0	0.111391	0.102649	0.914487	0.977775	0.735162	0.0814638	-3.6177	6.65772e-06	1.77132e-05	down	yes
EVM0034404	EVM0034404		EVM0034404.1	GO:0003700(DNA binding transcription factor activity);GO:0005515(protein binding);GO:0005634(nucleus);GO:0008270(zinc ion binding)	04712(Circadian rhythm - plant)	K12135		C2C2-CO-like	PREDICTED: putative zinc finger protein CONSTANS-LIKE 11 [Pyrus x bretschneideri]	mrna	0	0.150023	0.11303	0	0	0	876.843	9.77618	0.0288347	0.0462828	up	yes
EVM0025804	EVM0025804		EVM0025804.1	GO:0003677(DNA binding);GO:0003700(DNA binding transcription factor activity);GO:0005515(protein binding);GO:0005634(nucleus);GO:0006351(transcription, DNA-templated);GO:0006355(regulation of transcription, DNA-templated);GO:0009908(flower development);GO:0043565(sequence-specific DNA binding);GO:0046872(metal ion binding);GO:0048510(regulation of timing of transition from vegetative to reproduct…	04712(Circadian rhythm - plant)	K16222		C2C2-Dof	PREDICTED: cyclic dof factor 2-like [Malus domestica]	mrna	7.81678	9.04193	8.6098	1.57939	2.01783	1.74554	4.76692	2.25306	2.49075e-43	4.64138e-42	up	yes
EVM0013673	EVM0013673		EVM0013673.1	GO:0003677(DNA binding);GO:0003682(chromatin binding);GO:0003700(DNA binding transcription factor activity);GO:0005634(nucleus);GO:0006351(transcription, DNA-templated);GO:0006355(regulation of transcription, DNA-templated);GO:0009639(response to red or far red light);GO:0009845(seed germination);GO:0044212(transcription regulatory region DNA binding);GO:0045892(negative regulation of transcripti…				C2C2-Dof	PREDICTED: dof zinc finger protein DOF2.5-like isoform X1 [Pyrus x bretschneideri]	mrna	6.10507	4.30675	4.3379	0.376	0.603033	0.581879	9.44942	3.24023	2.15966e-26	2.1854e-25	up	yes
EVM0011714	EVM0011714		EVM0011714.1	GO:0003677(DNA binding);GO:0003700(DNA binding transcription factor activity);GO:0005515(protein binding);GO:0005634(nucleus);GO:0006351(transcription, DNA-templated);GO:0006355(regulation of transcription, DNA-templated);GO:0009908(flower development);GO:0043565(sequence-specific DNA binding);GO:0046872(metal ion binding);GO:0048510(regulation of timing of transition from vegetative to reproduct…	04712(Circadian rhythm - plant)	K16222		C2C2-Dof	hypothetical protein DVH24_013590 [Malus domestica]	mrna	1.61957	0.769842	0.848892	8.09534	7.24989	8.33557	0.136748	-2.87041	6.40009e-25	6.09415e-24	down	yes
EVM0027925	EVM0027925		EVM0027925.1	GO:0003677(DNA binding);GO:0003700(DNA binding transcription factor activity);GO:0005634(nucleus);GO:0006351(transcription, DNA-templated);GO:0006355(regulation of transcription, DNA-templated);GO:0044212(transcription regulatory region DNA binding);GO:0046872(metal ion binding);GO:0048364(root development)				C2C2-Dof	PREDICTED: dof zinc finger protein DOF2.1-like [Pyrus x bretschneideri]	mrna	13.3299	10.5674	13.3094	40.6128	40.6264	33.3621	0.324662	-1.62299	7.77855e-25	7.36158e-24	down	yes
EVM0010118	EVM0010118		EVM0010118.1	GO:0003677(DNA binding);GO:0003700(DNA binding transcription factor activity);GO:0005515(protein binding);GO:0005634(nucleus);GO:0006351(transcription, DNA-templated);GO:0006355(regulation of transcription, DNA-templated);GO:0009908(flower development);GO:0043565(sequence-specific DNA binding);GO:0046872(metal ion binding);GO:0048510(regulation of timing of transition from vegetative to reproduct…	04712(Circadian rhythm - plant)	K16222		C2C2-Dof	PREDICTED: cyclic dof factor 2-like [Pyrus x bretschneideri]	mrna	5.12728	6.18982	5.50832	2.54451	2.27129	2.14676	2.41656	1.27295	4.1075e-18	2.76621e-17	up	yes
EVM0021588	EVM0021588		EVM0021588.1	GO:0003677(DNA binding);GO:0003700(DNA binding transcription factor activity);GO:0005634(nucleus);GO:0006351(transcription, DNA-templated);GO:0006355(regulation of transcription, DNA-templated);GO:0044212(transcription regulatory region DNA binding);GO:0046872(metal ion binding);GO:0048364(root development)				C2C2-Dof	PREDICTED: dof zinc finger protein DOF1.4-like [Pyrus x bretschneideri]	mrna	12.7228	13.2373	13.9278	6.51769	6.1618	4.54505	2.31576	1.21149	7.87384e-18	5.21411e-17	up	yes
EVM0021263	EVM0021263		EVM0021263.1	GO:0003677(DNA binding);GO:0003700(DNA binding transcription factor activity);GO:0005634(nucleus);GO:0006351(transcription, DNA-templated);GO:0006355(regulation of transcription, DNA-templated);GO:0010200(response to chitin);GO:0044212(transcription regulatory region DNA binding);GO:0046872(metal ion binding)				C2C2-Dof	PREDICTED: dof zinc finger protein DOF2.4-like [Pyrus x bretschneideri]	mrna	9.30146	5.16886	6.04944	28.5454	25.4136	22.3421	0.268932	-1.89469	2.87258e-17	1.84107e-16	down	yes
EVM0009960	EVM0009960		EVM0009960.1	GO:0003677(DNA binding);GO:0003700(DNA binding transcription factor activity);GO:0005634(nucleus);GO:0006351(transcription, DNA-templated);GO:0006355(regulation of transcription, DNA-templated);GO:0046872(metal ion binding)				C2C2-Dof	dof zinc finger protein DOF4.6-like [Malus domestica]	mrna	8.5548	8.24865	6.65858	22.0332	20.5177	17.7037	0.389381	-1.36075	5.91257e-15	3.3017e-14	down	yes
EVM0011119	EVM0011119		EVM0011119.1	GO:0003677(DNA binding);GO:0003700(DNA binding transcription factor activity);GO:0005515(protein binding);GO:0005634(nucleus);GO:0006351(transcription, DNA-templated);GO:0009733(response to auxin);GO:0009751(response to salicylic acid);GO:0042545(cell wall modification);GO:0044212(transcription regulatory region DNA binding);GO:0045787(positive regulation of cell cycle);GO:0045893(positive regula…				C2C2-Dof	PREDICTED: dof zinc finger protein DOF3.4-like [Pyrus x bretschneideri]	mrna	6.72412	6.05756	6.38242	17.317	14.3362	17.0556	0.393443	-1.34577	1.93819e-13	9.75088e-13	down	yes
EVM0022950	EVM0022950		EVM0022950.1	GO:0003677(DNA binding);GO:0003700(DNA binding transcription factor activity);GO:0005634(nucleus);GO:0006351(transcription, DNA-templated);GO:0006355(regulation of transcription, DNA-templated);GO:0046872(metal ion binding)				C2C2-Dof	PREDICTED: dof zinc finger protein DOF2.4-like [Pyrus x bretschneideri]	mrna	2.28479	1.64147	2.56217	8.21001	7.25513	5.83542	0.304613	-1.71495	1.09049e-12	5.21378e-12	down	yes
EVM0035398	EVM0035398		EVM0035398.1	GO:0003677(DNA binding);GO:0003700(DNA binding transcription factor activity);GO:0005634(nucleus);GO:0006351(transcription, DNA-templated);GO:0006355(regulation of transcription, DNA-templated);GO:0010067(procambium histogenesis);GO:0010087(phloem or xylem histogenesis);GO:0045893(positive regulation of transcription, DNA-templated);GO:0046872(metal ion binding)				C2C2-Dof	PREDICTED: dof zinc finger protein DOF5.6-like [Malus domestica]	mrna	3.58314	2.27241	2.97776	11.4617	11.0749	7.1475	0.297577	-1.74866	6.43409e-12	2.91931e-11	down	yes
EVM0002993	EVM0002993		EVM0002993.1	GO:0003677(DNA binding);GO:0003700(DNA binding transcription factor activity);GO:0005634(nucleus);GO:0006351(transcription, DNA-templated);GO:0006355(regulation of transcription, DNA-templated);GO:0046872(metal ion binding)				C2C2-Dof	PREDICTED: dof zinc finger protein DOF3.6-like [Pyrus x bretschneideri]	mrna	6.78239	6.30464	5.79945	14.1926	14.7581	10.4954	0.478793	-1.06253	8.80875e-09	3.0719e-08	down	yes
EVM0027486	EVM0027486		EVM0027486.1	GO:0003677(DNA binding);GO:0003700(DNA binding transcription factor activity);GO:0005515(protein binding);GO:0005634(nucleus);GO:0006351(transcription, DNA-templated);GO:0009733(response to auxin);GO:0009751(response to salicylic acid);GO:0042545(cell wall modification);GO:0044212(transcription regulatory region DNA binding);GO:0045787(positive regulation of cell cycle);GO:0045893(positive regula…	04712(Circadian rhythm - plant)	K16222		C2C2-Dof	PREDICTED: dof zinc finger protein DOF3.4-like [Malus domestica]	mrna	1.8893	1.59863	1.56037	5.07847	3.64375	4.29021	0.38796	-1.36602	1.84261e-06	5.20243e-06	down	yes
EVM0015336	EVM0015336		EVM0015336.1	GO:0003677(DNA binding);GO:0003700(DNA binding transcription factor activity);GO:0005634(nucleus);GO:0006351(transcription, DNA-templated);GO:0006355(regulation of transcription, DNA-templated);GO:0046872(metal ion binding)				C2C2-Dof	PREDICTED: dof zinc finger protein DOF3.6-like [Pyrus x bretschneideri]	mrna	2.29535	2.11639	2.05407	5.72022	5.45654	3.50691	0.44034	-1.18331	8.38377e-06	2.2052e-05	down	yes
EVM0026387	EVM0026387		EVM0026387.1	GO:0003677(DNA binding);GO:0003700(DNA binding transcription factor activity);GO:0005634(nucleus);GO:0006351(transcription, DNA-templated);GO:0006355(regulation of transcription, DNA-templated);GO:0010052(guard cell differentiation);GO:0010118(stomatal movement);GO:0043565(sequence-specific DNA binding);GO:0045893(positive regulation of transcription, DNA-templated);GO:0046872(metal ion binding);…				C2C2-Dof	PREDICTED: dof zinc finger protein DOF5.7 [Pyrus x bretschneideri]	mrna	0.221323	0.244977	0.584278	1.54859	1.8775	1.32153	0.221286	-2.17602	3.17592e-05	7.8402e-05	down	yes
EVM0020502	EVM0020502		EVM0020502.1	GO:0003677(DNA binding);GO:0003700(DNA binding transcription factor activity);GO:0005634(nucleus);GO:0006351(transcription, DNA-templated);GO:0006355(regulation of transcription, DNA-templated);GO:0010067(procambium histogenesis);GO:0010087(phloem or xylem histogenesis);GO:0045893(positive regulation of transcription, DNA-templated);GO:0046872(metal ion binding)				C2C2-Dof	PREDICTED: dof zinc finger protein DOF5.6 [Pyrus x bretschneideri]	mrna	3.69209	2.77169	2.78762	8.23631	7.79794	4.58607	0.448654	-1.15632	0.000205876	0.000460856	down	yes
EVM0032678	EVM0032678		EVM0032678.1	GO:0003677(DNA binding);GO:0003700(DNA binding transcription factor activity);GO:0005515(protein binding);GO:0005634(nucleus);GO:0006351(transcription, DNA-templated);GO:0009733(response to auxin);GO:0009751(response to salicylic acid);GO:0042545(cell wall modification);GO:0044212(transcription regulatory region DNA binding);GO:0045787(positive regulation of cell cycle);GO:0045893(positive regula…				C2C2-Dof	PREDICTED: dof zinc finger protein DOF3.1-like [Pyrus x bretschneideri]	mrna	0.871473	0.806462	0.52676	2.07622	2.05179	1.65418	0.381291	-1.39104	0.00301428	0.00575037	down	yes
EVM0000266	EVM0000266		EVM0000266.1	GO:0000977(RNA polymerase II regulatory region sequence-specific DNA binding);GO:0001085(RNA polymerase II transcription factor binding);GO:0001228(transcriptional activator activity, RNA polymerase II transcription regulatory region sequence-specific DNA binding);GO:0003682(chromatin binding);GO:0005634(nucleus);GO:0005667(transcription factor complex);GO:0030154(cell differentiation)				C2C2-GATA	PREDICTED: GATA transcription factor 19-like [Pyrus x bretschneideri]	mrna	0.102142	0.063813	0.204165	4.08593	4.8931	2.41104	0.032495	-4.94364	1.97985e-25	1.92857e-24	down	yes
EVM0019203	EVM0019203		EVM0019203.1	GO:0000977(RNA polymerase II regulatory region sequence-specific DNA binding);GO:0001085(RNA polymerase II transcription factor binding);GO:0001228(transcriptional activator activity, RNA polymerase II transcription regulatory region sequence-specific DNA binding);GO:0003682(chromatin binding);GO:0005634(nucleus);GO:0005667(transcription factor complex);GO:0030154(cell differentiation)				C2C2-GATA	PREDICTED: GATA transcription factor 5-like [Pyrus x bretschneideri]	mrna	17.8647	17.5023	17.6734	38.0861	37.1626	37.1458	0.471913	-1.08341	6.46826e-24	5.86819e-23	down	yes
EVM0037692	EVM0037692		EVM0037692.1	GO:0000977(RNA polymerase II regulatory region sequence-specific DNA binding);GO:0001085(RNA polymerase II transcription factor binding);GO:0001228(transcriptional activator activity, RNA polymerase II transcription regulatory region sequence-specific DNA binding);GO:0003682(chromatin binding);GO:0005634(nucleus);GO:0005667(transcription factor complex);GO:0030154(cell differentiation)				C2C2-GATA	GATA domain class transcription factor [Malus domestica]	mrna	19.9744	20.9098	22.9914	10.5904	9.22776	9.55892	2.17434	1.12058	5.18434e-21	4.08489e-20	up	yes
EVM0027393	EVM0027393		EVM0027393.1	GO:0000977(RNA polymerase II regulatory region sequence-specific DNA binding);GO:0001085(RNA polymerase II transcription factor binding);GO:0001228(transcriptional activator activity, RNA polymerase II transcription regulatory region sequence-specific DNA binding);GO:0003682(chromatin binding);GO:0005634(nucleus);GO:0005667(transcription factor complex);GO:0030154(cell differentiation)				C2C2-GATA	hypothetical protein DVH24_016676 [Malus domestica]	mrna	12.144	11.9901	12.4305	5.21097	5.87258	5.81793	2.1634	1.1133	1.13176e-18	7.89436e-18	up	yes
EVM0001036	EVM0001036		EVM0001036.1	GO:0000977(RNA polymerase II regulatory region sequence-specific DNA binding);GO:0001085(RNA polymerase II transcription factor binding);GO:0001228(transcriptional activator activity, RNA polymerase II transcription regulatory region sequence-specific DNA binding);GO:0003682(chromatin binding);GO:0005634(nucleus);GO:0005667(transcription factor complex);GO:0030154(cell differentiation)				C2C2-GATA	PREDICTED: GATA transcription factor 18-like [Pyrus x bretschneideri]	mrna	1.09539	0.494678	1.05685	6.93117	6.20383	3.22112	0.161831	-2.62744	1.12114e-09	4.2229e-09	down	yes
EVM0010993	EVM0010993		EVM0010993.1	GO:0000977(RNA polymerase II regulatory region sequence-specific DNA binding);GO:0001085(RNA polymerase II transcription factor binding);GO:0001228(transcriptional activator activity, RNA polymerase II transcription regulatory region sequence-specific DNA binding);GO:0003682(chromatin binding);GO:0005634(nucleus);GO:0005667(transcription factor complex);GO:0030154(cell differentiation)				C2C2-GATA	PREDICTED: GATA transcription factor 21-like isoform X3 [Pyrus x bretschneideri]	mrna	1.21002	2.40617	1.56744	6.71387	7.77565	4.92207	0.267038	-1.90488	5.17523e-09	1.83936e-08	down	yes
EVM0033111	EVM0033111		EVM0033111.1	GO:0000977(RNA polymerase II regulatory region sequence-specific DNA binding);GO:0001085(RNA polymerase II transcription factor binding);GO:0001228(transcriptional activator activity, RNA polymerase II transcription regulatory region sequence-specific DNA binding);GO:0003682(chromatin binding);GO:0005634(nucleus);GO:0005667(transcription factor complex);GO:0030154(cell differentiation)	04712(Circadian rhythm - plant)	K12130		C2C2-GATA	hypothetical protein DVH24_016677 [Malus domestica]	mrna	1.59961	2.96951	1.87006	0.797654	1.0861	0.985268	2.24438	1.16632	0.00114496	0.00232061	up	yes
EVM0022565	EVM0022565		EVM0022565.1	GO:0000977(RNA polymerase II regulatory region sequence-specific DNA binding);GO:0001085(RNA polymerase II transcription factor binding);GO:0001228(transcriptional activator activity, RNA polymerase II transcription regulatory region sequence-specific DNA binding);GO:0003682(chromatin binding);GO:0005634(nucleus);GO:0005667(transcription factor complex);GO:0030154(cell differentiation)				C2C2-GATA	PREDICTED: GATA transcription factor 21 [Pyrus x bretschneideri]	mrna	0.339637	1.57685	1.04117	2.69445	3.13833	1.98341	0.378402	-1.40201	0.00694225	0.0124714	down	yes
EVM0033260	EVM0033260		EVM0033260.1	GO:0000977(RNA polymerase II regulatory region sequence-specific DNA binding);GO:0001085(RNA polymerase II transcription factor binding);GO:0001228(transcriptional activator activity, RNA polymerase II transcription regulatory region sequence-specific DNA binding);GO:0003682(chromatin binding);GO:0005634(nucleus);GO:0005667(transcription factor complex);GO:0030154(cell differentiation)				C2C2-GATA	PREDICTED: GATA transcription factor 21-like [Malus domestica]	mrna	0	0	0.03197	0.307462	0.155682	0.133316	0.0535996	-4.22163	0.012255	0.0210475	down	yes
EVM0012465	EVM0012465		EVM0012465.1	GO:0000977(RNA polymerase II regulatory region sequence-specific DNA binding);GO:0001085(RNA polymerase II transcription factor binding);GO:0001228(transcriptional activator activity, RNA polymerase II transcription regulatory region sequence-specific DNA binding);GO:0003682(chromatin binding);GO:0005634(nucleus);GO:0005667(transcription factor complex);GO:0030154(cell differentiation)				C2C2-GATA	PREDICTED: GATA transcription factor 12-like [Pyrus x bretschneideri]	mrna	1.06475	0.788555	0.985553	2.48101	2.13784	1.24096	0.484464	-1.04554	0.0240873	0.039162	down	yes
EVM0003780	EVM0003780		EVM0003780.1	GO:0005515(protein binding);GO:0005634(nucleus);GO:0060548(negative regulation of cell death)	04144(Endocytosis)	K12191		C2C2-LSD	PREDICTED: protein LSD1 isoform X2 [Pyrus x bretschneideri]	mrna	25.5325	24.8008	24.6865	11.3966	12.9356	10.5334	2.15169	1.10547	3.06749e-17	1.96295e-16	up	yes
EVM0021005	EVM0021005		EVM0021005.1	GO:0003677(DNA binding);GO:0003700(DNA binding transcription factor activity);GO:0005515(protein binding);GO:0005634(nucleus);GO:0007275(multicellular organism development);GO:0009909(regulation of flower development);GO:0009933(meristem structural organization);GO:0009944(polarity specification of adaxial/abaxial axis);GO:0010093(specification of floral organ identity);GO:0010154(fruit developme…				C2C2-YABBY	PREDICTED: axial regulator YABBY 3-like [Pyrus x bretschneideri]	mrna	4.12715	7.25672	5.99985	24.402	28.6013	24.742	0.223598	-2.16102	4.93534e-25	4.71146e-24	down	yes
EVM0030908	EVM0030908		EVM0030908.1	GO:0003677(DNA binding);GO:0003700(DNA binding transcription factor activity);GO:0005515(protein binding);GO:0005634(nucleus);GO:0006355(regulation of transcription, DNA-templated);GO:0009944(polarity specification of adaxial/abaxial axis);GO:0045165(cell fate commitment);GO:0046872(metal ion binding);GO:1902183(regulation of shoot apical meristem development);GO:2000024(regulation of leaf develo…				C2C2-YABBY	PREDICTED: axial regulator YABBY 5-like [Pyrus x bretschneideri]	mrna	16.4854	28.9129	28.5352	92.4244	91.646	76.3632	0.283886	-1.81661	6.16315e-17	3.87539e-16	down	yes
EVM0022267	EVM0022267		EVM0022267.1	GO:0003677(DNA binding);GO:0003700(DNA binding transcription factor activity);GO:0005515(protein binding);GO:0005634(nucleus);GO:0007275(multicellular organism development);GO:0009909(regulation of flower development);GO:0009933(meristem structural organization);GO:0009944(polarity specification of adaxial/abaxial axis);GO:0010093(specification of floral organ identity);GO:0010154(fruit developme…				C2C2-YABBY	PREDICTED: axial regulator YABBY 1 isoform X2 [Pyrus x bretschneideri]	mrna	10.1231	13.5289	16.4292	40.3943	40.3155	35.8174	0.343964	-1.53967	1.32343e-14	7.19935e-14	down	yes
EVM0029811	EVM0029811		EVM0029811.1	GO:0003677(DNA binding);GO:0003700(DNA binding transcription factor activity);GO:0005515(protein binding);GO:0005634(nucleus);GO:0007275(multicellular organism development);GO:0009909(regulation of flower development);GO:0009933(meristem structural organization);GO:0009944(polarity specification of adaxial/abaxial axis);GO:0010093(specification of floral organ identity);GO:0010154(fruit developme…				C2C2-YABBY	PREDICTED: axial regulator YABBY 1-like [Pyrus x bretschneideri]	mrna	10.6495	18.238	12.6509	38.1294	44.6444	35.751	0.350463	-1.51267	2.47093e-13	1.23344e-12	down	yes
EVM0003467	EVM0003467		EVM0003467.1	GO:0003677(DNA binding);GO:0003700(DNA binding transcription factor activity);GO:0005515(protein binding);GO:0005634(nucleus);GO:0006355(regulation of transcription, DNA-templated);GO:0009944(polarity specification of adaxial/abaxial axis);GO:0045165(cell fate commitment);GO:0046872(metal ion binding);GO:1902183(regulation of shoot apical meristem development);GO:2000024(regulation of leaf develo…				C2C2-YABBY	PREDICTED: axial regulator YABBY 5-like [Pyrus x bretschneideri]	mrna	7.4451	15.9676	16.7962	59.7956	61.9583	60.239	0.220937	-2.1783	1.97337e-08	6.68051e-08	down	yes
EVM0024497	EVM0024497		EVM0024497.1	GO:0003676(nucleic acid binding);GO:0003700(DNA binding transcription factor activity);GO:0005634(nucleus);GO:0006355(regulation of transcription, DNA-templated)				C2H2	PREDICTED: uncharacterized protein LOC103938197 [Pyrus x bretschneideri]	mrna	0.7929	1.22323	0.717965	14.3074	13.2584	11.5642	0.069872	-3.83914	1.24713e-64	4.2408e-63	down	yes
EVM0010555	EVM0010555		EVM0010555.1	GO:0003700(DNA binding transcription factor activity)				C2H2	hypothetical protein DVH24_037850 [Malus domestica]	mrna	33.9579	39.8198	37.7721	12.9603	13.8447	12.4842	2.8392	1.50548	2.72541e-59	8.09994e-58	up	yes
EVM0015599	EVM0015599		EVM0015599.1	GO:0003676(nucleic acid binding);GO:0003700(DNA binding transcription factor activity);GO:0005515(protein binding);GO:0005634(nucleus);GO:0006351(transcription, DNA-templated);GO:0006355(regulation of transcription, DNA-templated);GO:0008270(zinc ion binding);GO:0009937(regulation of gibberellic acid mediated signaling pathway);GO:0010029(regulation of seed germination);GO:0010431(seed maturation…	00052(Galactose metabolism);00600(Sphingolipid metabolism);00531(Glycosaminoglycan degradation);00604(Glycosphingolipid biosynthesis - ganglio series);00511(Other glycan degradation)	K12309	EC:3.2.1.23	C2H2	PREDICTED: protein indeterminate-domain 2-like [Pyrus x bretschneideri]	mrna	25.4021	19.8381	21.9606	7.06159	7.63665	6.67328	3.14441	1.65279	3.15131e-53	7.9035e-52	up	yes
EVM0025179	EVM0025179		EVM0025179.1	GO:0003676(nucleic acid binding);GO:0003677(DNA binding);GO:0003700(DNA binding transcription factor activity);GO:0005634(nucleus);GO:0006351(transcription, DNA-templated);GO:0006355(regulation of transcription, DNA-templated);GO:0008270(zinc ion binding);GO:0046872(metal ion binding)	00052(Galactose metabolism);00600(Sphingolipid metabolism);00531(Glycosaminoglycan degradation);00604(Glycosphingolipid biosynthesis - ganglio series);00511(Other glycan degradation)	K12309	EC:3.2.1.23	C2H2	PREDICTED: protein indeterminate-domain 7 isoform X1 [Pyrus x bretschneideri]	mrna	4.12145	3.5506	3.53944	16.3846	18.2766	15.523	0.223407	-2.16226	4.02514e-51	9.48849e-50	down	yes
EVM0013675	EVM0013675		EVM0013675.1	GO:0003676(nucleic acid binding);GO:0003700(DNA binding transcription factor activity);GO:0005515(protein binding);GO:0005634(nucleus);GO:0006351(transcription, DNA-templated);GO:0006355(regulation of transcription, DNA-templated);GO:0008270(zinc ion binding);GO:0008356(asymmetric cell division);GO:0044212(transcription regulatory region DNA binding);GO:0046872(metal ion binding);GO:0048364(root …	00052(Galactose metabolism);00600(Sphingolipid metabolism);00531(Glycosaminoglycan degradation);00604(Glycosphingolipid biosynthesis - ganglio series);00511(Other glycan degradation)	K12309	EC:3.2.1.23	C2H2	PREDICTED: protein indeterminate-domain 2-like [Pyrus x bretschneideri]	mrna	22.6871	24.1553	24.2876	9.11802	9.95205	9.00337	2.53371	1.34125	1.59719e-45	3.21587e-44	up	yes
EVM0004998	EVM0004998		EVM0004998.1	GO:0003676(nucleic acid binding);GO:0003700(DNA binding transcription factor activity);GO:0005634(nucleus);GO:0006355(regulation of transcription, DNA-templated);GO:0008270(zinc ion binding)				C2H2	PREDICTED: zinc finger protein 3 [Pyrus x bretschneideri]	mrna	18.6173	16.1732	15.9435	3.68678	2.87229	2.30556	5.7232	2.51682	2.57632e-41	4.53123e-40	up	yes
EVM0005632	EVM0005632		EVM0005632.1	GO:0003676(nucleic acid binding);GO:0003700(DNA binding transcription factor activity);GO:0005515(protein binding);GO:0005634(nucleus);GO:0006351(transcription, DNA-templated);GO:0006355(regulation of transcription, DNA-templated);GO:0008270(zinc ion binding);GO:0009937(regulation of gibberellic acid mediated signaling pathway);GO:0010029(regulation of seed germination);GO:0010431(seed maturation…	00052(Galactose metabolism);00600(Sphingolipid metabolism);00531(Glycosaminoglycan degradation);00604(Glycosphingolipid biosynthesis - ganglio series);00511(Other glycan degradation)	K12309	EC:3.2.1.23	C2H2	PREDICTED: protein indeterminate-domain 2-like [Pyrus x bretschneideri]	mrna	32.6548	31.3023	31.995	15.7594	15.811	13.7783	2.11587	1.08125	9.61481e-38	1.49493e-36	up	yes
EVM0036175	EVM0036175		EVM0036175.1	GO:0003676(nucleic acid binding);GO:0004407(histone deacetylase activity);GO:0005634(nucleus);GO:0005730(nucleolus);GO:0006351(transcription, DNA-templated);GO:0007275(multicellular organism development);GO:0008270(zinc ion binding);GO:0009414(response to water deprivation);GO:0009651(response to salt stress);GO:0009737(response to abscisic acid);GO:0016569(covalent chromatin modification);GO:001…				C2H2	PREDICTED: histone deacetylase HDT1-like [Pyrus x bretschneideri]	mrna	24.2549	19.8298	21.4531	4.01939	3.08223	5.10054	5.371	2.42519	1.86799e-36	2.77806e-35	up	yes
EVM0016982	EVM0016982		EVM0016982.2	GO:0003676(nucleic acid binding);GO:0003700(DNA binding transcription factor activity);GO:0005634(nucleus);GO:0006355(regulation of transcription, DNA-templated);GO:0008270(zinc ion binding);GO:0009738(abscisic acid-activated signaling pathway);GO:0009788(negative regulation of abscisic acid-activated signaling pathway);GO:0019760(glucosinolate metabolic process);GO:0043565(sequence-specific DNA …				C2H2	PREDICTED: zinc finger protein 4-like [Pyrus x bretschneideri]	mrna	9.36069	9.8631	9.4423	2.7344	2.89756	2.11533	3.70014	1.88758	1.03061e-32	1.35246e-31	up	yes
EVM0034919	EVM0034919		EVM0034919.1	GO:0003676(nucleic acid binding);GO:0003700(DNA binding transcription factor activity);GO:0005576(extracellular region);GO:0006355(regulation of transcription, DNA-templated);GO:0008270(zinc ion binding);GO:0016021(integral component of membrane);GO:0031225(anchored component of membrane)				C2H2	PREDICTED: uncharacterized protein LOC103963270 [Pyrus x bretschneideri]	mrna	31.0824	28.4331	27.2221	12.1994	12.7913	13.9127	2.22957	1.15676	1.23455e-32	1.61611e-31	up	yes
EVM0039767	EVM0039767		EVM0039767.1	GO:0003700(DNA binding transcription factor activity);GO:0005634(nucleus);GO:0010200(response to chitin);GO:0043565(sequence-specific DNA binding);GO:0044212(transcription regulatory region DNA binding)				C2H2	PREDICTED: zinc finger protein ZAT12-like [Pyrus x bretschneideri]	mrna	12.4343	12.1852	18.808	0.37289	0.674191	1.42724	17.5513	4.13351	1.30323e-31	1.63701e-30	up	yes
EVM0003381	EVM0003381		EVM0003381.1	GO:0003676(nucleic acid binding);GO:0003700(DNA binding transcription factor activity);GO:0005515(protein binding);GO:0005634(nucleus);GO:0006351(transcription, DNA-templated);GO:0006355(regulation of transcription, DNA-templated);GO:0008270(zinc ion binding);GO:0009937(regulation of gibberellic acid mediated signaling pathway);GO:0010029(regulation of seed germination);GO:0010431(seed maturation…	00052(Galactose metabolism);00600(Sphingolipid metabolism);00531(Glycosaminoglycan degradation);00604(Glycosphingolipid biosynthesis - ganglio series);00511(Other glycan degradation)	K12309	EC:3.2.1.23	C2H2	PREDICTED: protein indeterminate-domain 2-like [Pyrus x bretschneideri]	mrna	16.4686	14.3983	14.4615	5.62867	6.50345	5.67068	2.54614	1.34831	3.49373e-30	4.15071e-29	up	yes
EVM0014674	EVM0014674		EVM0014674.1	GO:0003676(nucleic acid binding);GO:0003700(DNA binding transcription factor activity);GO:0005515(protein binding);GO:0005634(nucleus);GO:0006351(transcription, DNA-templated);GO:0006355(regulation of transcription, DNA-templated);GO:0008270(zinc ion binding);GO:0009937(regulation of gibberellic acid mediated signaling pathway);GO:0010029(regulation of seed germination);GO:0010431(seed maturation…	00052(Galactose metabolism);00600(Sphingolipid metabolism);00531(Glycosaminoglycan degradation);00604(Glycosphingolipid biosynthesis - ganglio series);00511(Other glycan degradation)	K12309	EC:3.2.1.23	C2H2	C2H2L domain class transcription factor [Malus domestica]	mrna	14.2008	15.676	18.5044	6.7221	7.31852	5.2932	2.50241	1.32332	3.83536e-19	2.74568e-18	up	yes
EVM0028513	EVM0028513		EVM0028513.1	GO:0003676(nucleic acid binding);GO:0003677(DNA binding);GO:0003700(DNA binding transcription factor activity);GO:0005634(nucleus);GO:0006351(transcription, DNA-templated);GO:0006355(regulation of transcription, DNA-templated);GO:0008270(zinc ion binding);GO:0046872(metal ion binding)	00052(Galactose metabolism);00600(Sphingolipid metabolism);00531(Glycosaminoglycan degradation);00604(Glycosphingolipid biosynthesis - ganglio series);00511(Other glycan degradation)	K12309	EC:3.2.1.23	C2H2	PREDICTED: protein indeterminate-domain 9-like isoform X1 [Pyrus x bretschneideri]	mrna	14.3348	17.8401	17.6151	8.66328	7.87467	8.17925	2.01439	1.01034	1.11024e-16	6.8756e-16	up	yes
EVM0038868	EVM0038868		EVM0038868.1	GO:0003700(DNA binding transcription factor activity);GO:0005634(nucleus);GO:0010200(response to chitin);GO:0043565(sequence-specific DNA binding);GO:0044212(transcription regulatory region DNA binding)				C2H2	hypothetical protein DVH24_034361 [Malus domestica]	mrna	3.94602	5.17268	3.96482	1.19056	0.871606	1.09281	4.14695	2.05205	8.23056e-12	3.69928e-11	up	yes
EVM0018936	EVM0018936		EVM0018936.1	GO:0003700(DNA binding transcription factor activity);GO:0005634(nucleus);GO:0043565(sequence-specific DNA binding);GO:0044212(transcription regulatory region DNA binding)				C2H2	PREDICTED: zinc finger protein ZAT12-like [Pyrus x bretschneideri]	mrna	42.4751	38.3208	30.0717	11.7241	18.0257	17.6809	2.33747	1.22495	1.10579e-11	4.92433e-11	up	yes
EVM0016479	EVM0016479		EVM0016479.1	GO:0003700(DNA binding transcription factor activity);GO:0005634(nucleus);GO:0010094(specification of carpel identity);GO:0010097(specification of stamen identity);GO:0043565(sequence-specific DNA binding);GO:0044212(transcription regulatory region DNA binding)				C2H2	PREDICTED: zinc finger protein JAGGED-like [Pyrus x bretschneideri]	mrna	0.614867	0.477123	0.676081	4.36207	2.17717	3.32818	0.179183	-2.4805	1.91764e-11	8.37949e-11	down	yes
EVM0036135	EVM0036135		EVM0036135.1					C2H2	PREDICTED: histone deacetylase HDT1-like [Pyrus x bretschneideri]	mrna	13.6661	13.7932	13.448	27.8408	36.0746	27.1718	0.449101	-1.15489	2.86318e-11	1.23605e-10	down	yes
EVM0035756	EVM0035756		EVM0035756.1	GO:0003676(nucleic acid binding);GO:0003700(DNA binding transcription factor activity);GO:0005515(protein binding);GO:0005634(nucleus);GO:0006351(transcription, DNA-templated);GO:0006355(regulation of transcription, DNA-templated);GO:0008270(zinc ion binding);GO:0009937(regulation of gibberellic acid mediated signaling pathway);GO:0010029(regulation of seed germination);GO:0010431(seed maturation…	00052(Galactose metabolism);00600(Sphingolipid metabolism);00531(Glycosaminoglycan degradation);00604(Glycosphingolipid biosynthesis - ganglio series);00511(Other glycan degradation)	K12309	EC:3.2.1.23	C2H2	PREDICTED: protein indeterminate-domain 2-like [Pyrus x bretschneideri]	mrna	11.458	8.82532	8.84004	5.50246	4.63676	4.01925	2.05696	1.04051	3.05589e-11	1.31588e-10	up	yes
EVM0031921	EVM0031921		EVM0031921.1	GO:0003676(nucleic acid binding);GO:0005515(protein binding);GO:0005634(nucleus);GO:0006457(protein folding);GO:0008270(zinc ion binding)				C2H2	hypothetical protein DVH24_023718 [Malus domestica]	mrna	5.76797	6.78578	6.96964	3.3387	2.93059	3.10038	2.08368	1.05913	4.00759e-11	1.70696e-10	up	yes
EVM0022019	EVM0022019		EVM0022019.1	GO:0003676(nucleic acid binding);GO:0003677(DNA binding);GO:0003700(DNA binding transcription factor activity);GO:0005634(nucleus);GO:0006351(transcription, DNA-templated);GO:0006355(regulation of transcription, DNA-templated);GO:0008270(zinc ion binding);GO:0009507(chloroplast);GO:0046872(metal ion binding)	00052(Galactose metabolism);00600(Sphingolipid metabolism);00531(Glycosaminoglycan degradation);00604(Glycosphingolipid biosynthesis - ganglio series);00511(Other glycan degradation)	K12309	EC:3.2.1.23	C2H2	PREDICTED: protein indeterminate-domain 5, chloroplastic-like [Malus domestica]	mrna	2.68186	2.22304	1.79024	5.96819	5.89381	5.13247	0.39396	-1.34388	4.12052e-11	1.75345e-10	down	yes
EVM0034669	EVM0034669		EVM0034669.1	GO:0003676(nucleic acid binding);GO:0003700(DNA binding transcription factor activity);GO:0005634(nucleus);GO:0006355(regulation of transcription, DNA-templated);GO:0008270(zinc ion binding)				C2H2	PREDICTED: uncharacterized protein LOC103956687 [Pyrus x bretschneideri]	mrna	1.54351	1.96232	2.48739	6.19815	5.73734	6.07405	0.332781	-1.58736	2.16986e-09	7.9548e-09	down	yes
EVM0018713	EVM0018713		EVM0018713.1	GO:0003676(nucleic acid binding);GO:0003700(DNA binding transcription factor activity);GO:0005634(nucleus);GO:0006355(regulation of transcription, DNA-templated)				C2H2	PREDICTED: uncharacterized protein LOC103946569 [Pyrus x bretschneideri]	mrna	0.395295	1.1077	1.16564	4.81015	4.18263	3.92492	0.206587	-2.27518	3.25079e-09	1.17511e-08	down	yes
EVM0015241	EVM0015241		EVM0015241.1	GO:0003676(nucleic acid binding);GO:0003677(DNA binding);GO:0003700(DNA binding transcription factor activity);GO:0005634(nucleus);GO:0006351(transcription, DNA-templated);GO:0006355(regulation of transcription, DNA-templated);GO:0008270(zinc ion binding);GO:0009507(chloroplast);GO:0046872(metal ion binding)	00052(Galactose metabolism);00600(Sphingolipid metabolism);00531(Glycosaminoglycan degradation);00604(Glycosphingolipid biosynthesis - ganglio series);00511(Other glycan degradation)	K12309	EC:3.2.1.23	C2H2	PREDICTED: protein indeterminate-domain 5, chloroplastic [Pyrus x bretschneideri]	mrna	0.152838	0.393455	0.496512	2.67235	2.85325	1.44199	0.149665	-2.74019	5.66495e-09	2.00691e-08	down	yes
EVM0022374	EVM0022374		EVM0022374.1	GO:0003676(nucleic acid binding);GO:0003700(DNA binding transcription factor activity);GO:0005515(protein binding);GO:0005634(nucleus);GO:0006351(transcription, DNA-templated);GO:0006355(regulation of transcription, DNA-templated);GO:0008270(zinc ion binding);GO:0009736(cytokinin-activated signaling pathway);GO:0009740(gibberellic acid mediated signaling pathway);GO:0009873(ethylene-activated sig…	03410(Base excision repair)	K10773	EC:4.2.99.18	C2H2	PREDICTED: zinc finger protein 5 [Pyrus x bretschneideri]	mrna	0.420834	1.54567	1.12244	0	0	0	10296.5	13.3299	5.6995e-09	2.01858e-08	up	yes
EVM0021105	EVM0021105		EVM0021105.1	GO:0003700(DNA binding transcription factor activity);GO:0005634(nucleus);GO:0043565(sequence-specific DNA binding);GO:0044212(transcription regulatory region DNA binding)				C2H2	hypothetical protein DVH24_005986 [Malus domestica]	mrna	0.352946	0.557761	0.13484	0	0	0	3485.16	11.767	2.49583e-07	7.64063e-07	up	yes
EVM0010748	EVM0010748		EVM0010748.1	GO:0003676(nucleic acid binding);GO:0005515(protein binding);GO:0005634(nucleus);GO:0006351(transcription, DNA-templated);GO:0006355(regulation of transcription, DNA-templated);GO:0006952(defense response);GO:0006970(response to osmotic stress);GO:0009414(response to water deprivation);GO:0009416(response to light stimulus);GO:0009646(response to absence of light);GO:0009651(response to salt stre…				C2H2	PREDICTED: uncharacterized zinc finger protein At4g06634-like [Pyrus x bretschneideri]	mrna	1.06084	0.705269	1.16458	3.21875	4.20573	2.93544	0.282887	-1.8217	3.14155e-07	9.53052e-07	down	yes
EVM0028975	EVM0028975		EVM0028975.1	GO:0003676(nucleic acid binding);GO:0003700(DNA binding transcription factor activity);GO:0003723(RNA binding);GO:0005634(nucleus);GO:0005730(nucleolus);GO:0005737(cytoplasm);GO:0006351(transcription, DNA-templated);GO:0006355(regulation of transcription, DNA-templated);GO:0007275(multicellular organism development);GO:0008097(5S rRNA binding);GO:0008270(zinc ion binding);GO:0046872(metal ion bin…				C2H2	PREDICTED: transcription factor IIIA-like [Pyrus x bretschneideri]	mrna	3.63593	4.74401	3.46027	8.27655	6.76271	9.49969	0.482507	-1.05138	1.3365e-06	3.81539e-06	down	yes
EVM0017720	EVM0017720		EVM0017720.1	GO:0003676(nucleic acid binding);GO:0003700(DNA binding transcription factor activity);GO:0005634(nucleus);GO:0006355(regulation of transcription, DNA-templated);GO:0008270(zinc ion binding)				C2H2	hypothetical protein DVH24_020124 [Malus domestica]	mrna	3.78978	5.64725	5.78384	9.9463	11.2328	9.72138	0.492577	-1.02158	8.75161e-06	2.29758e-05	down	yes
EVM0032747	EVM0032747		EVM0032747.1	GO:0003700(DNA binding transcription factor activity);GO:0005634(nucleus);GO:0010200(response to chitin);GO:0043565(sequence-specific DNA binding);GO:0044212(transcription regulatory region DNA binding)				C2H2	PREDICTED: zinc finger protein ZAT12-like [Pyrus x bretschneideri]	mrna	3.34254	3.29357	4.29055	0.690622	0.88898	2.01701	3.03804	1.60314	2.50012e-05	6.24385e-05	up	yes
EVM0024415	EVM0024415		EVM0024415.1	GO:0003700(DNA binding transcription factor activity);GO:0005634(nucleus);GO:0010094(specification of carpel identity);GO:0010097(specification of stamen identity);GO:0043565(sequence-specific DNA binding);GO:0044212(transcription regulatory region DNA binding)				C2H2	PREDICTED: zinc finger protein JAGGED-like [Pyrus x bretschneideri]	mrna	0.302806	0	0.27006	1.68093	1.35966	1.14309	0.136929	-2.8685	0.000616217	0.00129531	down	yes
EVM0029077	EVM0029077		EVM0029077.1					C2H2		mrna	1.16596	1.63101	1.46947	4.34271	3.98241	4.24233	0.339484	-1.55859	0.000801289	0.0016587	down	yes
EVM0032344	EVM0032344		EVM0032344.1	GO:0003676(nucleic acid binding);GO:0003700(DNA binding transcription factor activity);GO:0005634(nucleus);GO:0006351(transcription, DNA-templated);GO:0006355(regulation of transcription, DNA-templated);GO:0010044(response to aluminum ion);GO:0010200(response to chitin);GO:0010447(response to acidic pH);GO:0046872(metal ion binding)				C2H2	PREDICTED: zinc finger protein STOP1 homolog [Pyrus x bretschneideri]	mrna	0.504597	0.489285	0.278716	0.103268	0	0.029644	9.57474	3.25923	0.00111214	0.00225889	up	yes
EVM0032952	EVM0032952		EVM0032952.1	GO:0003676(nucleic acid binding);GO:0003700(DNA binding transcription factor activity);GO:0005634(nucleus);GO:0006355(regulation of transcription, DNA-templated);GO:0008270(zinc ion binding);GO:0043565(sequence-specific DNA binding)				C2H2	PREDICTED: uncharacterized protein LOC103422653 [Malus domestica]	mrna	0.06854	0	0.367447	0	0	0	1453.29	10.5051	0.00444519	0.00825945	up	yes
EVM0030469	EVM0030469		EVM0030469.1	GO:0003676(nucleic acid binding);GO:0003700(DNA binding transcription factor activity);GO:0005634(nucleus);GO:0006351(transcription, DNA-templated);GO:0006355(regulation of transcription, DNA-templated);GO:0010087(phloem or xylem histogenesis);GO:0010305(leaf vascular tissue pattern formation);GO:0010588(cotyledon vascular tissue pattern formation);GO:0046872(metal ion binding);GO:0048364(root de…				C2H2	PREDICTED: zinc finger protein WIP6-like [Pyrus x bretschneideri]	mrna	0.106114	0.112094	0	0.697876	0.627875	0.31216	0.133223	-2.90808	0.00589656	0.0107226	down	yes
EVM0016833	EVM0016833		EVM0016833.1	GO:0003700(DNA binding transcription factor activity);GO:0005634(nucleus);GO:0043565(sequence-specific DNA binding);GO:0044212(transcription regulatory region DNA binding)				C2H2	PREDICTED: zinc finger protein ZAT9-like [Pyrus x bretschneideri]	mrna	0.239718	0.388121	0.429028	0.873728	0.625105	1.33166	0.373387	-1.42126	0.0149459	0.025233	down	yes
EVM0006794	EVM0006794		EVM0006794.1	GO:0003700(DNA binding transcription factor activity);GO:0005634(nucleus);GO:0043565(sequence-specific DNA binding);GO:0044212(transcription regulatory region DNA binding);GO:0048235(pollen sperm cell differentiation)				C2H2	PREDICTED: zinc finger protein ZAT9-like [Pyrus x bretschneideri]	mrna	0.141539	0.266554	0.240617	0.476975	0.556411	0.60991	0.394762	-1.34095	0.0272396	0.0438964	down	yes
EVM0014943	EVM0014943		EVM0014943.1	GO:0003700(DNA binding transcription factor activity);GO:0005634(nucleus);GO:0043565(sequence-specific DNA binding);GO:0044212(transcription regulatory region DNA binding);GO:0048235(pollen sperm cell differentiation)				C2H2	PREDICTED: uncharacterized protein LOC103402838 [Malus domestica]	mrna	0.472628	0.282892	0.260808	0.66598	1.04691	0.607475	0.438004	-1.19098	0.0273416	0.0440513	down	yes
EVM0005030	EVM0005030		EVM0005030.1	GO:0003676(nucleic acid binding);GO:0003677(DNA binding);GO:0003700(DNA binding transcription factor activity);GO:0005634(nucleus);GO:0005886(plasma membrane);GO:0006355(regulation of transcription, DNA-templated);GO:0006979(response to oxidative stress);GO:0046872(metal ion binding)				C3H	hypothetical protein DVH24_018053 [Malus domestica]	mrna	241.777	232.251	291.38	29.7039	32.0776	28.2151	8.50486	3.08829	6.6817e-194	1.9156e-191	up	yes
EVM0038991	EVM0038991		EVM0038991.1	GO:0003676(nucleic acid binding);GO:0003677(DNA binding);GO:0003700(DNA binding transcription factor activity);GO:0005634(nucleus);GO:0005886(plasma membrane);GO:0006355(regulation of transcription, DNA-templated);GO:0006979(response to oxidative stress);GO:0046872(metal ion binding)				C3H	PREDICTED: zinc finger CCCH domain-containing protein 23-like [Pyrus x bretschneideri]	mrna	75.0813	72.2874	97.6804	9.67179	10.7542	7.79044	8.68463	3.11846	1.41426e-98	9.98257e-97	up	yes
EVM0026418	EVM0026418		EVM0026418.1	GO:0003677(DNA binding);GO:0003700(DNA binding transcription factor activity);GO:0005634(nucleus);GO:0006355(regulation of transcription, DNA-templated);GO:0046872(metal ion binding)				C3H	zinc finger CCCH domain-containing protein 66-like [Malus domestica]	mrna	43.0451	41.5708	43.5926	16.2936	15.4318	14.9919	2.74435	1.45646	1.21379e-92	7.62843e-91	up	yes
EVM0028645	EVM0028645		EVM0028645.1	GO:0003676(nucleic acid binding);GO:0003677(DNA binding);GO:0005515(protein binding);GO:0005634(nucleus);GO:0008150(biological_process);GO:0046872(metal ion binding)				C3H	PREDICTED: zinc finger CCCH domain-containing protein 6-like [Malus domestica]	mrna	21.4424	23.3133	22.3591	3.52957	4.39937	2.88313	6.2074	2.63399	7.38482e-76	3.31996e-74	up	yes
EVM0038433	EVM0038433		EVM0038433.1	GO:0003677(DNA binding);GO:0003700(DNA binding transcription factor activity);GO:0005634(nucleus);GO:0005737(cytoplasm);GO:0006355(regulation of transcription, DNA-templated);GO:0046872(metal ion binding)				C3H	PREDICTED: LOW QUALITY PROTEIN: zinc finger CCCH domain-containing protein 56-like [Malus domestica]	mrna	0	0.049513	0.070048	3.09334	2.79635	3.29556	0.0130166	-6.2635	1.52428e-35	2.18999e-34	down	yes
EVM0030595	EVM0030595		EVM0030595.1	GO:0003676(nucleic acid binding);GO:0003677(DNA binding);GO:0003700(DNA binding transcription factor activity);GO:0005515(protein binding);GO:0005634(nucleus);GO:0006351(transcription, DNA-templated);GO:0006355(regulation of transcription, DNA-templated);GO:0010187(negative regulation of seed germination);GO:0046872(metal ion binding)				C3H	zinc finger CCCH domain-containing protein 2 [Malus domestica]	mrna	3.50618	4.29554	2.95786	0	0.045661	0.079009	86.3045	6.43136	1.93727e-32	2.51569e-31	up	yes
EVM0006762	EVM0006762		EVM0006762.1	GO:0003676(nucleic acid binding);GO:0003677(DNA binding);GO:0005737(cytoplasm);GO:0008150(biological_process);GO:0046872(metal ion binding)				C3H	zinc finger CCCH domain-containing protein 11 [Prunus yedoensis var. nudiflora]	mrna	13.0353	14.603	13.2662	4.91195	5.89705	5.54102	2.5018	1.32297	1.22653e-31	1.54408e-30	up	yes
EVM0030762	EVM0030762		EVM0030762.1	GO:0005634(nucleus);GO:0005737(cytoplasm);GO:0005829(cytosol);GO:0005983(starch catabolic process);GO:0005986(sucrose biosynthetic process);GO:0006000(fructose metabolic process);GO:0006002(fructose 6-phosphate metabolic process);GO:0006094(gluconeogenesis);GO:0009737(response to abscisic acid);GO:0009750(response to fructose);GO:0015979(photosynthesis);GO:0016311(dephosphorylation);GO:0030388(fr…	00010(Glycolysis / Gluconeogenesis);00030(Pentose phosphate pathway);00051(Fructose and mannose metabolism);00710(Carbon fixation in photosynthetic organisms)	K03841	EC:3.1.3.11	C3H	PREDICTED: fructose-1,6-bisphosphatase, cytosolic-like [Pyrus x bretschneideri]	mrna	14.3993	15.7983	14.9545	4.84842	6.27875	6.04167	2.62989	1.395	3.36694e-23	2.93939e-22	up	yes
EVM0021642	EVM0021642		EVM0021642.1	GO:0003677(DNA binding);GO:0005737(cytoplasm);GO:0008150(biological_process);GO:0046872(metal ion binding)	04120(Ubiquitin mediated proteolysis)	K10260		C3H	PREDICTED: zinc finger CCCH domain-containing protein 48-like [Pyrus x bretschneideri]	mrna	16.1419	14.3735	14.2737	6.40651	8.10046	7.10801	2.07213	1.05111	5.76021e-23	4.96939e-22	up	yes
EVM0020238	EVM0020238		EVM0020238.1	GO:0003677(DNA binding);GO:0005634(nucleus)				C3H	PREDICTED: zinc finger CCCH domain-containing protein 62-like [Pyrus x bretschneideri]	mrna	1.53762	1.3672	2.21746	8.95541	7.95018	6.88767	0.215283	-2.2157	1.86641e-20	1.42891e-19	down	yes
EVM0039965	EVM0039965		EVM0039965.1	GO:0003676(nucleic acid binding);GO:0003677(DNA binding);GO:0003700(DNA binding transcription factor activity);GO:0005634(nucleus);GO:0006355(regulation of transcription, DNA-templated);GO:0046872(metal ion binding)				C3H	PREDICTED: zinc finger CCCH domain-containing protein 56-like [Pyrus x bretschneideri]	mrna	5.69721	4.64365	5.37145	14.6461	13.5955	12.9068	0.381844	-1.38894	4.80408e-16	2.86974e-15	down	yes
EVM0031367	EVM0031367		EVM0031367.1	GO:0003676(nucleic acid binding);GO:0003677(DNA binding);GO:0003700(DNA binding transcription factor activity);GO:0005634(nucleus);GO:0005886(plasma membrane);GO:0006355(regulation of transcription, DNA-templated);GO:0006979(response to oxidative stress);GO:0046872(metal ion binding)				C3H	PREDICTED: zinc finger CCCH domain-containing protein 20-like [Pyrus x bretschneideri]	mrna	80.1217	44.7185	44.5279	21.9577	24.7852	22.1705	2.4577	1.29731	3.49809e-13	1.72859e-12	up	yes
EVM0015387	EVM0015387		EVM0015387.1	GO:0003676(nucleic acid binding);GO:0003700(DNA binding transcription factor activity);GO:0003730(mRNA 3'-UTR binding);GO:0005634(nucleus);GO:0005829(cytosol);GO:0006355(regulation of transcription, DNA-templated);GO:0044212(transcription regulatory region DNA binding);GO:0046872(metal ion binding);GO:0061158(3'-UTR-mediated mRNA destabilization)				C3H	PREDICTED: zinc finger CCCH domain-containing protein 15-like [Pyrus x bretschneideri]	mrna	1.00741	0.775327	0.777017	0.146271	0.075955	0.040554	9.74103	3.28407	2.25269e-10	9.00713e-10	up	yes
EVM0020583	EVM0020583		EVM0020583.1	GO:0003676(nucleic acid binding);GO:0003677(DNA binding);GO:0003700(DNA binding transcription factor activity);GO:0005634(nucleus);GO:0005886(plasma membrane);GO:0006355(regulation of transcription, DNA-templated);GO:0006979(response to oxidative stress);GO:0046872(metal ion binding)				C3H	PREDICTED: zinc finger CCCH domain-containing protein 23-like [Malus domestica]	mrna	42.5116	22.608	31.9447	16.048	12.3144	16.7439	2.1519	1.10561	2.59134e-09	9.44331e-09	up	yes
EVM0021343	EVM0021343		EVM0021343.1					C3H	PREDICTED: zinc finger CCCH domain-containing protein 3 [Malus domestica]	mrna	4.4752	4.13186	4.39689	1.21867	0.900826	1.46365	3.6292	1.85965	1.40225e-06	3.99666e-06	up	yes
EVM0005769	EVM0005769		EVM0005769.1	GO:0005684(U2-type spliceosomal complex);GO:0034247(snoRNA splicing);GO:0045292(mRNA cis splicing, via spliceosome)				C3H	hypothetical protein DVH24_005493 [Malus domestica]	mrna	0.258723	0.312178	0.519461	1.85767	1.21202	1.30686	0.249137	-2.00499	0.000255016	0.000563779	down	yes
EVM0035717	EVM0035717		EVM0035717.1	GO:0003676(nucleic acid binding);GO:0003700(DNA binding transcription factor activity);GO:0003730(mRNA 3'-UTR binding);GO:0005634(nucleus);GO:0005829(cytosol);GO:0006355(regulation of transcription, DNA-templated);GO:0044212(transcription regulatory region DNA binding);GO:0046872(metal ion binding);GO:0061158(3'-UTR-mediated mRNA destabilization)				C3H	PREDICTED: zinc finger CCCH domain-containing protein 14-like [Pyrus x bretschneideri]	mrna	0.633516	0.590031	0.428125	0	0.102699	0	16.0826	4.00743	0.000473941	0.0010124	up	yes
EVM0019824	EVM0019824		EVM0019824.1	GO:0005684(U2-type spliceosomal complex);GO:0034247(snoRNA splicing);GO:0045292(mRNA cis splicing, via spliceosome)				C3H	hypothetical protein DVH24_011875 [Malus domestica]	mrna	0.162046	0.24452	0.398411	1.03354	1.5793	0.707959	0.242404	-2.04451	0.000538575	0.00114183	down	yes
EVM0031715	EVM0031715		EVM0031715.1	GO:0003676(nucleic acid binding);GO:0003700(DNA binding transcription factor activity);GO:0003730(mRNA 3'-UTR binding);GO:0005634(nucleus);GO:0005829(cytosol);GO:0006355(regulation of transcription, DNA-templated);GO:0044212(transcription regulatory region DNA binding);GO:0046872(metal ion binding);GO:0061158(3'-UTR-mediated mRNA destabilization)				C3H	PREDICTED: zinc finger CCCH domain-containing protein 15-like [Pyrus x bretschneideri]	mrna	1.6996	1.29364	0.979218	0.651448	0.407474	0.613175	2.37574	1.24838	0.00166362	0.00329918	up	yes
EVM0028580	EVM0028580		EVM0028580.1	GO:0003676(nucleic acid binding);GO:0003700(DNA binding transcription factor activity);GO:0003730(mRNA 3'-UTR binding);GO:0005634(nucleus);GO:0005829(cytosol);GO:0006355(regulation of transcription, DNA-templated);GO:0044212(transcription regulatory region DNA binding);GO:0046872(metal ion binding);GO:0061158(3'-UTR-mediated mRNA destabilization)				C3H	PREDICTED: zinc finger CCCH domain-containing protein 14-like [Pyrus x bretschneideri]	mrna	0.74625	1.01917	0.384803	0.139973	0.137114	0.26367	3.97633	1.99144	0.00265962	0.00511409	up	yes
EVM0037071	EVM0037071		EVM0037071.1	GO:0003676(nucleic acid binding);GO:0003677(DNA binding);GO:0003700(DNA binding transcription factor activity);GO:0005515(protein binding);GO:0005634(nucleus);GO:0006351(transcription, DNA-templated);GO:0006355(regulation of transcription, DNA-templated);GO:0010187(negative regulation of seed germination);GO:0046872(metal ion binding)				C3H	PREDICTED: zinc finger CCCH domain-containing protein 2-like [Malus domestica]	mrna	0.37809	1.43597	0.498729	1.97623	2.50468	2.01706	0.355925	-1.49035	0.00558404	0.0101955	down	yes
EVM0001217	EVM0001217		EVM0001217.1					C3H	PREDICTED: zinc finger CCCH domain-containing protein 6 [Pyrus x bretschneideri]	mrna	0	0	0	0.12862	0.143514	0.054505	0.000918445	-10.0885	0.0103151	0.0179516	down	yes
EVM0038105	EVM0038105		EVM0038105.1	GO:0003676(nucleic acid binding);GO:0003677(DNA binding);GO:0003729(mRNA binding);GO:0005634(nucleus);GO:0046872(metal ion binding)				C3H	PREDICTED: zinc finger CCCH domain-containing protein 32-like [Pyrus x bretschneideri]	mrna	0.501259	0.395179	0.448259	1.01515	0.90164	0.875481	0.481579	-1.05416	0.0134011	0.0228286	down	yes
EVM0000899	EVM0000899		EVM0000899.1	GO:0003677(DNA binding);GO:0003700(DNA binding transcription factor activity);GO:0005634(nucleus);GO:0005737(cytoplasm);GO:0006355(regulation of transcription, DNA-templated);GO:0046872(metal ion binding)				C3H	PREDICTED: LOW QUALITY PROTEIN: zinc finger CCCH domain-containing protein 56-like [Malus domestica]	mrna	0.334003	0.586801	0.389764	0.216273	0.200258	0.180388	2.19555	1.13459	0.0140723	0.0238751	up	yes
EVM0028621	EVM0028621		EVM0028621.1	GO:0005634(nucleus);GO:0043565(sequence-specific DNA binding);GO:0045944(positive regulation of transcription by RNA polymerase II)				CAMTA	PREDICTED: calmodulin-binding transcription activator 2-like isoform X1 [Pyrus x bretschneideri]	mrna	28.7116	26.5941	27.6369	8.34583	9.57614	7.73607	3.23262	1.6927	1.24564e-73	5.34222e-72	up	yes
EVM0025537	EVM0025537		EVM0025537.1	GO:0005634(nucleus);GO:0043565(sequence-specific DNA binding);GO:0045944(positive regulation of transcription by RNA polymerase II)				CAMTA	PREDICTED: calmodulin-binding transcription activator 3-like [Pyrus x bretschneideri]	mrna	21.2517	19.306	20.6644	6.49421	7.89876	6.46938	2.93457	1.55315	2.90965e-55	7.78463e-54	up	yes
EVM0012790	EVM0012790		EVM0012790.1	GO:0005634(nucleus);GO:0043565(sequence-specific DNA binding);GO:0045944(positive regulation of transcription by RNA polymerase II)				CAMTA	PREDICTED: calmodulin-binding transcription activator 5-like isoform X2 [Pyrus x bretschneideri]	mrna	46.7396	64.6594	62.5914	14.007	17.6151	13.8819	3.82363	1.93494	1.03101e-47	2.21468e-46	up	yes
EVM0032628	EVM0032628		EVM0032628.1	GO:0005634(nucleus);GO:0043565(sequence-specific DNA binding);GO:0045944(positive regulation of transcription by RNA polymerase II)				CAMTA	PREDICTED: calmodulin-binding transcription activator 3-like isoform X2 [Pyrus x bretschneideri]	mrna	24.8961	21.9812	25.1236	10.1863	10.1785	10.656	2.32105	1.21478	2.59591e-47	5.51264e-46	up	yes
EVM0016232	EVM0016232		EVM0016232.1	GO:0005634(nucleus);GO:0043565(sequence-specific DNA binding);GO:0045944(positive regulation of transcription by RNA polymerase II)				CAMTA	PREDICTED: calmodulin-binding transcription activator 2-like [Pyrus x bretschneideri]	mrna	33.2291	35.8371	36.9342	15.6199	16.6204	13.2813	2.32857	1.21945	7.49814e-39	1.21026e-37	up	yes
EVM0026095	EVM0026095		EVM0026095.1	GO:0003677(DNA binding);GO:0003713(transcription coactivator activity);GO:0005515(protein binding);GO:0005634(nucleus);GO:0005667(transcription factor complex);GO:0006351(transcription, DNA-templated);GO:0006355(regulation of transcription, DNA-templated);GO:0060261(positive regulation of transcription initiation from RNA polymerase II promoter)				Coactivator	PREDICTED: RNA polymerase II transcriptional coactivator KIWI-like [Pyrus x bretschneideri]	mrna	6.73107	5.62805	7.48199	27.798	28.8764	28.078	0.234107	-2.09476	3.90593e-24	3.58194e-23	down	yes
EVM0035450	EVM0035450		EVM0035450.1	GO:0003700(DNA binding transcription factor activity);GO:0005634(nucleus);GO:0009934(regulation of meristem structural organization);GO:0046872(metal ion binding);GO:0048444(floral organ morphogenesis);GO:0051302(regulation of cell division)				CPP	PREDICTED: protein tesmin/TSO1-like CXC 2 isoform X2 [Pyrus x bretschneideri]	mrna	3.21002	3.30306	3.82588	12.0343	11.6127	10.0382	0.306929	-1.70402	9.60664e-31	1.1666e-29	down	yes
EVM0022511	EVM0022511		EVM0022511.1	GO:0003700(DNA binding transcription factor activity);GO:0005634(nucleus);GO:0009934(regulation of meristem structural organization);GO:0046872(metal ion binding);GO:0048444(floral organ morphogenesis);GO:0051302(regulation of cell division)				CPP	PREDICTED: protein tesmin/TSO1-like CXC 3 [Pyrus x bretschneideri]	mrna	1.95734	1.70109	1.89631	5.63868	5.5825	4.65942	0.349782	-1.51547	6.99477e-19	4.94477e-18	down	yes
EVM0036740	EVM0036740		EVM0036740.1	GO:0003700(DNA binding transcription factor activity);GO:0005634(nucleus);GO:0009934(regulation of meristem structural organization);GO:0046872(metal ion binding);GO:0048444(floral organ morphogenesis);GO:0051302(regulation of cell division)				CPP	PREDICTED: protein tesmin/TSO1-like CXC 2 [Pyrus x bretschneideri]	mrna	7.94432	8.74504	7.97665	19.0872	18.7051	13.8437	0.47769	-1.06585	4.77403e-11	2.01818e-10	down	yes
EVM0010898	EVM0010898		EVM0010898.1	GO:0005634(nucleus);GO:0006355(regulation of transcription, DNA-templated);GO:0009640(photomorphogenesis)				DBB	hypothetical protein DVH24_035241 [Malus domestica]	mrna	5.76225	6.14176	7.16507	2.33404	2.21356	2.32372	2.77517	1.47258	4.37946e-12	2.00983e-11	up	yes
EVM0035995	EVM0035995		EVM0035995.1	GO:0004722(protein serine/threonine phosphatase activity);GO:0005515(protein binding);GO:0005634(nucleus);GO:0005737(cytoplasm);GO:0005829(cytosol);GO:0006470(protein dephosphorylation);GO:0046872(metal ion binding);GO:0050688(regulation of defense response to virus)				DBP	hypothetical protein DVH24_012180 [Malus domestica]	mrna	2.13205	1.82958	2.85409	5.64383	6.34026	5.35328	0.393123	-1.34695	6.37719e-07	1.87957e-06	down	yes
EVM0028242	EVM0028242		EVM0028242.1	GO:0004722(protein serine/threonine phosphatase activity);GO:0005515(protein binding);GO:0005634(nucleus);GO:0005737(cytoplasm);GO:0005829(cytosol);GO:0006470(protein dephosphorylation);GO:0046872(metal ion binding);GO:0050688(regulation of defense response to virus)				DBP	hypothetical protein DVH24_012180 [Malus domestica]	mrna	2.61319	1.68907	2.47619	5.02425	5.22153	4.73969	0.452335	-1.14454	3.14444e-05	7.76611e-05	down	yes
EVM0041458	EVM0041458		EVM0041458.1	GO:0003677(DNA binding);GO:0003700(DNA binding transcription factor activity);GO:0005515(protein binding);GO:0005634(nucleus);GO:0005667(transcription factor complex);GO:0006351(transcription, DNA-templated);GO:0006355(regulation of transcription, DNA-templated);GO:0032876(negative regulation of DNA endoreduplication);GO:0042023(DNA endoreduplication)				E2F-DP	PREDICTED: E2F transcription factor-like E2FE isoform X1 [Malus domestica]	mrna	1.10243	1.60173	1.92289	13.0787	14.8482	11.6092	0.117033	-3.09501	3.00717e-42	5.4405e-41	down	yes
EVM0035218	EVM0035218		EVM0035218.1	GO:0000981(RNA polymerase II transcription factor activity, sequence-specific DNA binding);GO:0005634(nucleus);GO:0006357(regulation of transcription by RNA polymerase II)				E2F-DP	PREDICTED: transcription factor-like protein DPB isoform X1 [Pyrus x bretschneideri]	mrna	7.15947	8.36561	7.88484	3.49092	3.21725	2.99608	2.41234	1.27043	1.68419e-20	1.29179e-19	up	yes
EVM0034077	EVM0034077		EVM0034077.1	GO:0003677(DNA binding);GO:0003700(DNA binding transcription factor activity);GO:0005515(protein binding);GO:0005634(nucleus);GO:0005667(transcription factor complex);GO:0006351(transcription, DNA-templated);GO:0006355(regulation of transcription, DNA-templated);GO:0032876(negative regulation of DNA endoreduplication);GO:0042023(DNA endoreduplication)				E2F-DP	PREDICTED: E2F transcription factor-like E2FE isoform X4 [Malus domestica]	mrna	1.96676	1.56418	2.05617	5.27823	5.70052	6.01255	0.328822	-1.60462	2.03094e-11	8.85586e-11	down	yes
EVM0041202	EVM0041202		EVM0041202.1	GO:0000902(cell morphogenesis);GO:0003677(DNA binding);GO:0003700(DNA binding transcription factor activity);GO:0005515(protein binding);GO:0005634(nucleus);GO:0005667(transcription factor complex);GO:0005730(nucleolus);GO:0005737(cytoplasm);GO:0006351(transcription, DNA-templated);GO:0006355(regulation of transcription, DNA-templated);GO:0019760(glucosinolate metabolic process);GO:0042023(DNA en…				E2F-DP	PREDICTED: transcription factor E2FC-like [Malus domestica]	mrna	0.357069	0.548852	0.79674	1.63168	1.85798	1.18324	0.36437	-1.45652	0.00193891	0.00381085	down	yes
EVM0002546	EVM0002546		EVM0002546.1	GO:0000976(transcription regulatory region sequence-specific DNA binding);GO:0001666(response to hypoxia);GO:0003677(DNA binding);GO:0003700(DNA binding transcription factor activity);GO:0005515(protein binding);GO:0005634(nucleus);GO:0006351(transcription, DNA-templated);GO:0006355(regulation of transcription, DNA-templated);GO:0009723(response to ethylene);GO:0009873(ethylene-activated signalin…	04016(MAPK signaling pathway - plant);04075(Plant hormone signal transduction)	K14514		EIL	PREDICTED: ETHYLENE INSENSITIVE 3-like 1 protein [Pyrus x bretschneideri]	mrna	57.4072	55.4564	56.9374	17.4322	17.5424	16.3001	3.31159	1.72752	5.307e-121	5.8002e-119	up	yes
EVM0026041	EVM0026041		EVM0026041.1	GO:0000976(transcription regulatory region sequence-specific DNA binding);GO:0001666(response to hypoxia);GO:0003677(DNA binding);GO:0003700(DNA binding transcription factor activity);GO:0005515(protein binding);GO:0005634(nucleus);GO:0006351(transcription, DNA-templated);GO:0006355(regulation of transcription, DNA-templated);GO:0009723(response to ethylene);GO:0009873(ethylene-activated signalin…	04016(MAPK signaling pathway - plant);04075(Plant hormone signal transduction)	K14514		EIL	PREDICTED: ETHYLENE INSENSITIVE 3-like 1 protein [Pyrus x bretschneideri]	mrna	54.5066	58.7235	61.6929	20.0003	21.802	16.4504	3.00282	1.58632	1.67008e-51	3.98479e-50	up	yes
EVM0008261	EVM0008261		EVM0008261.1	GO:0000976(transcription regulatory region sequence-specific DNA binding);GO:0001666(response to hypoxia);GO:0003677(DNA binding);GO:0003700(DNA binding transcription factor activity);GO:0005515(protein binding);GO:0005634(nucleus);GO:0006351(transcription, DNA-templated);GO:0006355(regulation of transcription, DNA-templated);GO:0009723(response to ethylene);GO:0009873(ethylene-activated signalin…	04016(MAPK signaling pathway - plant);04075(Plant hormone signal transduction)	K14514		EIL	EIL [Pyrus x bretschneideri]	mrna	51.454	48.5442	53.9749	14.8219	17.057	11.569	3.54385	1.82532	6.60875e-50	1.5092e-48	up	yes
EVM0009506	EVM0009506		EVM0009506.1	GO:0000976(transcription regulatory region sequence-specific DNA binding);GO:0001666(response to hypoxia);GO:0003677(DNA binding);GO:0003700(DNA binding transcription factor activity);GO:0005515(protein binding);GO:0005634(nucleus);GO:0006351(transcription, DNA-templated);GO:0006355(regulation of transcription, DNA-templated);GO:0009723(response to ethylene);GO:0009873(ethylene-activated signalin…	04016(MAPK signaling pathway - plant);04075(Plant hormone signal transduction)	K14514		EIL	PREDICTED: ETHYLENE INSENSITIVE 3-like 1 protein [Pyrus x bretschneideri]	mrna	41.9161	37.8422	43.3246	15.0409	16.4997	11.2088	2.87917	1.52565	5.74076e-34	7.85146e-33	up	yes
EVM0012472	EVM0012472		EVM0012472.3	GO:0003677(DNA binding);GO:0003700(DNA binding transcription factor activity);GO:0005515(protein binding);GO:0005622(intracellular);GO:0005634(nucleus);GO:0006351(transcription, DNA-templated);GO:0006355(regulation of transcription, DNA-templated);GO:0009873(ethylene-activated signaling pathway);GO:0042762(regulation of sulfur metabolic process);GO:0071281(cellular response to iron ion)	04016(MAPK signaling pathway - plant);04075(Plant hormone signal transduction)	K14514		EIL	PREDICTED: ETHYLENE INSENSITIVE 3-like 3 protein [Pyrus x bretschneideri]	mrna	13.9513	16.1756	15.6212	5.54675	6.79567	5.46228	2.56944	1.36145	4.33522e-32	5.55794e-31	up	yes
EVM0015557	EVM0015557		EVM0015557.1	GO:0000976(transcription regulatory region sequence-specific DNA binding);GO:0001666(response to hypoxia);GO:0003677(DNA binding);GO:0003700(DNA binding transcription factor activity);GO:0005515(protein binding);GO:0005634(nucleus);GO:0006351(transcription, DNA-templated);GO:0006355(regulation of transcription, DNA-templated);GO:0009723(response to ethylene);GO:0009873(ethylene-activated signalin…	04016(MAPK signaling pathway - plant);04075(Plant hormone signal transduction)	K14514		EIL	PREDICTED: ETHYLENE INSENSITIVE 3-like 1 protein [Pyrus x bretschneideri]	mrna	0.61539	0.305466	0.463759	0.119188	0.295388	0.171126	2.36403	1.24125	0.00663729	0.0119633	up	yes
EVM0009338	EVM0009338		EVM0009338.2	GO:0003700(DNA binding transcription factor activity);GO:0005515(protein binding);GO:0005634(nucleus);GO:0008270(zinc ion binding);GO:0009585(red, far-red light phototransduction);GO:0009639(response to red or far red light);GO:0010017(red or far-red light signaling pathway);GO:0010018(far-red light signaling pathway);GO:0010218(response to far red light);GO:0042753(positive regulation of circadi…				FAR1	PREDICTED: protein FAR1-RELATED SEQUENCE 7-like isoform X1 [Malus domestica]	mrna	3.07285	2.87655	2.61071	7.1008	6.4883	6.07565	0.435302	-1.19991	8.44043e-16	4.97417e-15	down	yes
EVM0016399	EVM0016399		EVM0016399.1	GO:0003674(molecular_function);GO:0003700(DNA binding transcription factor activity);GO:0005634(nucleus);GO:0009585(red, far-red light phototransduction);GO:0009639(response to red or far red light);GO:0010018(far-red light signaling pathway);GO:0042753(positive regulation of circadian rhythm);GO:0045893(positive regulation of transcription, DNA-templated)				FAR1	PREDICTED: protein FAR-RED ELONGATED HYPOCOTYL 3-like [Pyrus x bretschneideri]	mrna	24.3812	29.2303	22.723	10.0383	13.6357	9.19843	2.32215	1.21546	4.59532e-14	2.41352e-13	up	yes
EVM0009197	EVM0009197		EVM0009197.1	GO:0005515(protein binding);GO:0005634(nucleus);GO:0006355(regulation of transcription, DNA-templated);GO:0008270(zinc ion binding);GO:0009639(response to red or far red light)				FAR1	PREDICTED: protein FAR1-RELATED SEQUENCE 11-like [Pyrus x bretschneideri]	mrna	1.27692	1.11814	1.18455	3.12272	2.91087	2.51613	0.418683	-1.25607	1.23699e-09	4.6347e-09	down	yes
EVM0004983	EVM0004983		EVM0004983.1	GO:0005515(protein binding);GO:0005634(nucleus);GO:0006355(regulation of transcription, DNA-templated);GO:0008270(zinc ion binding);GO:0009585(red, far-red light phototransduction);GO:0009639(response to red or far red light);GO:0045893(positive regulation of transcription, DNA-templated)				FAR1	PREDICTED: protein FAR1-RELATED SEQUENCE 5-like [Malus domestica]	mrna	0.576082	0.368601	0.389669	1.67882	2.44069	1.55442	0.235172	-2.08821	6.71308e-09	2.36407e-08	down	yes
EVM0021977	EVM0021977		EVM0021977.1	GO:0000987(proximal promoter sequence-specific DNA binding);GO:0003700(DNA binding transcription factor activity);GO:0005634(nucleus);GO:0009585(red, far-red light phototransduction);GO:0009639(response to red or far red light);GO:0010018(far-red light signaling pathway);GO:0042753(positive regulation of circadian rhythm);GO:0045893(positive regulation of transcription, DNA-templated)				FAR1	PREDICTED: protein FAR1-RELATED SEQUENCE 7-like isoform X1 [Pyrus x bretschneideri]	mrna	2.51929	3.02967	2.74534	7.07731	6.58597	9.23909	0.362159	-1.4653	1.11854e-07	3.53249e-07	down	yes
EVM0025465	EVM0025465		EVM0025465.1	GO:0005515(protein binding);GO:0005634(nucleus);GO:0006355(regulation of transcription, DNA-templated);GO:0008270(zinc ion binding);GO:0009585(red, far-red light phototransduction);GO:0009639(response to red or far red light);GO:0045893(positive regulation of transcription, DNA-templated)				FAR1	PREDICTED: protein FAR1-RELATED SEQUENCE 5-like [Malus domestica]	mrna	0.69346	0.728986	0.602984	1.83889	1.98867	1.60731	0.372673	-1.42402	1.29351e-06	3.69806e-06	down	yes
EVM0028762	EVM0028762		EVM0028762.1	GO:0003700(DNA binding transcription factor activity);GO:0005634(nucleus);GO:0006355(regulation of transcription, DNA-templated);GO:0009585(red, far-red light phototransduction);GO:0009639(response to red or far red light);GO:0010018(far-red light signaling pathway);GO:0042753(positive regulation of circadian rhythm);GO:0045893(positive regulation of transcription, DNA-templated)				FAR1	PREDICTED: uncharacterized protein LOC103940842 [Pyrus x bretschneideri]	mrna	0.819623	1.08007	1.0679	2.56691	3.01272	2.44163	0.369965	-1.43454	4.32727e-06	1.17477e-05	down	yes
EVM0037687	EVM0037687		EVM0037687.1	GO:0003700(DNA binding transcription factor activity);GO:0005634(nucleus);GO:0006355(regulation of transcription, DNA-templated);GO:0009585(red, far-red light phototransduction);GO:0009639(response to red or far red light);GO:0010018(far-red light signaling pathway);GO:0042753(positive regulation of circadian rhythm);GO:0045893(positive regulation of transcription, DNA-templated)				FAR1	PREDICTED: protein FAR-RED ELONGATED HYPOCOTYL 3-like [Pyrus x bretschneideri]	mrna	2.50275	2.92189	3.152	7.67049	7.86056	5.69598	0.404043	-1.30742	5.16626e-06	1.3915e-05	down	yes
EVM0020496	EVM0020496		EVM0020496.1	GO:0005634(nucleus);GO:0006355(regulation of transcription, DNA-templated);GO:0008270(zinc ion binding);GO:0009639(response to red or far red light)				FAR1	PREDICTED: putative protein FAR1-RELATED SEQUENCE 10 [Pyrus x bretschneideri]	mrna	0.755668	0.796781	0.815309	2.08102	2.57722	1.25664	0.400305	-1.32083	0.000215364	0.000480709	down	yes
EVM0038381	EVM0038381		EVM0038381.1	GO:0003674(molecular_function);GO:0003700(DNA binding transcription factor activity);GO:0005634(nucleus);GO:0009585(red, far-red light phototransduction);GO:0009639(response to red or far red light);GO:0010018(far-red light signaling pathway);GO:0042753(positive regulation of circadian rhythm);GO:0045893(positive regulation of transcription, DNA-templated)				FAR1	PREDICTED: putative protein FAR1-RELATED SEQUENCE 10 isoform X1 [Malus domestica]	mrna	2.44925	1.92848	2.08563	5.31192	3.89769	5.15456	0.449964	-1.15212	0.000266155	0.000586838	down	yes
EVM0040557	EVM0040557		EVM0040557.1	GO:0003700(DNA binding transcription factor activity);GO:0005634(nucleus);GO:0008270(zinc ion binding);GO:0009585(red, far-red light phototransduction);GO:0009639(response to red or far red light);GO:0010018(far-red light signaling pathway);GO:0042753(positive regulation of circadian rhythm);GO:0045893(positive regulation of transcription, DNA-templated)				FAR1	PREDICTED: protein FAR1-RELATED SEQUENCE 6-like [Pyrus x bretschneideri]	mrna	0	0.363655	0	4.8264	4.53141	6.24346	0.0233093	-5.42295	0.0199745	0.0329788	down	yes
EVM0012151	EVM0012151		EVM0012151.1	GO:0000156(phosphorelay response regulator activity);GO:0003677(DNA binding);GO:0003700(DNA binding transcription factor activity);GO:0005515(protein binding);GO:0005634(nucleus);GO:0006351(transcription, DNA-templated);GO:0006355(regulation of transcription, DNA-templated);GO:0009723(response to ethylene);GO:0009735(response to cytokinin);GO:0009736(cytokinin-activated signaling pathway);GO:0009…	04075(Plant hormone signal transduction)	K14491		GARP-ARR-B	PREDICTED: two-component response regulator ORR21 isoform X3 [Pyrus x bretschneideri]	mrna	65.0203	59.1612	63.2196	25.8901	25.14	23.7642	2.50555	1.32513	7.80825e-73	3.28449e-71	up	yes
EVM0004784	EVM0004784		EVM0004784.1	GO:0000156(phosphorelay response regulator activity);GO:0000160(phosphorelay signal transduction system);GO:0003677(DNA binding);GO:0003700(DNA binding transcription factor activity);GO:0005515(protein binding);GO:0005634(nucleus);GO:0006351(transcription, DNA-templated);GO:0006355(regulation of transcription, DNA-templated);GO:0007623(circadian rhythm)	04075(Plant hormone signal transduction)	K14491		GARP-ARR-B	PREDICTED: two-component response regulator-like APRR2 [Malus domestica]	mrna	14.9723	17.6377	15.9487	51.119	52.1002	56.1232	0.304744	-1.71433	7.34695e-59	2.16282e-57	down	yes
EVM0024264	EVM0024264		EVM0024264.1	GO:0000156(phosphorelay response regulator activity);GO:0000160(phosphorelay signal transduction system);GO:0003677(DNA binding);GO:0003700(DNA binding transcription factor activity);GO:0005515(protein binding);GO:0005634(nucleus);GO:0006351(transcription, DNA-templated);GO:0006355(regulation of transcription, DNA-templated);GO:0009735(response to cytokinin);GO:0009736(cytokinin-activated signali…	04075(Plant hormone signal transduction)	K14491		GARP-ARR-B	hypothetical protein DVH24_040974 [Malus domestica]	mrna	1.37041	1.55976	1.14605	0.192104	0.216336	0.27978	5.92285	2.56629	4.45941e-14	2.34378e-13	up	yes
EVM0036340	EVM0036340		EVM0036340.1	GO:0003677(DNA binding);GO:0003700(DNA binding transcription factor activity);GO:0005634(nucleus);GO:0006351(transcription, DNA-templated);GO:0006355(regulation of transcription, DNA-templated);GO:0007623(circadian rhythm);GO:0009909(regulation of flower development)	04075(Plant hormone signal transduction)	K14491		GARP-G2-like	PREDICTED: transcription factor PCL1-like [Pyrus x bretschneideri]	mrna	11.353	10.9817	13.0959	0.94295	1.33821	0.861063	11.2756	3.49514	6.52401e-98	4.56179e-96	up	yes
EVM0036362	EVM0036362		EVM0036362.1	GO:0003677(DNA binding);GO:0003700(DNA binding transcription factor activity);GO:0005634(nucleus);GO:0006351(transcription, DNA-templated);GO:0006355(regulation of transcription, DNA-templated);GO:0007623(circadian rhythm);GO:0009909(regulation of flower development)	04075(Plant hormone signal transduction)	K14491		GARP-G2-like	PREDICTED: transcription factor PCL1-like [Pyrus x bretschneideri]	mrna	13.6111	14.267	15.809	0.17604	0.670737	0.902418	24.9756	4.64245	7.17339e-43	1.31957e-41	up	yes
EVM0017542	EVM0017542		EVM0017542.1	GO:0003677(DNA binding);GO:0003700(DNA binding transcription factor activity);GO:0005634(nucleus);GO:0006351(transcription, DNA-templated);GO:0006355(regulation of transcription, DNA-templated)	04075(Plant hormone signal transduction)	K14491		GARP-G2-like	PREDICTED: myb family transcription factor EFM-like [Pyrus x bretschneideri]	mrna	19.2761	20.1638	22.5284	6.42204	7.21324	6.15187	3.13174	1.64697	2.60224e-40	4.41432e-39	up	yes
EVM0019054	EVM0019054		EVM0019054.1	GO:0005634(nucleus);GO:0006355(regulation of transcription, DNA-templated);GO:0044212(transcription regulatory region DNA binding)	04075(Plant hormone signal transduction)	K14491		GARP-G2-like	hypothetical protein DVH24_030881 [Malus domestica]	mrna	2.41595	2.22441	2.06839	11.1816	9.93717	9.68522	0.217788	-2.199	1.15945e-36	1.74099e-35	down	yes
EVM0031969	EVM0031969		EVM0031969.1	GO:0003677(DNA binding);GO:0003700(DNA binding transcription factor activity);GO:0005515(protein binding);GO:0005634(nucleus);GO:0006351(transcription, DNA-templated);GO:0006355(regulation of transcription, DNA-templated);GO:0009266(response to temperature stimulus);GO:0009740(gibberellic acid mediated signaling pathway);GO:0009908(flower development);GO:0010452(histone H3-K36 methylation);GO:004…	04075(Plant hormone signal transduction)	K14491		GARP-G2-like	PREDICTED: myb family transcription factor EFM-like [Pyrus x bretschneideri]	mrna	6.58204	7.48188	5.83832	22.1155	19.9405	23.7603	0.302391	-1.72552	1.18383e-32	1.5508e-31	down	yes
EVM0004342	EVM0004342		EVM0004342.1	GO:0005634(nucleus);GO:0006355(regulation of transcription, DNA-templated);GO:0044212(transcription regulatory region DNA binding)	04075(Plant hormone signal transduction)	K14491		GARP-G2-like	hypothetical protein DVH24_030881 [Malus domestica]	mrna	2.86194	1.79499	2.25889	10.5626	11.2223	11.4256	0.208242	-2.26367	5.3315e-28	5.77448e-27	down	yes
EVM0018173	EVM0018173		EVM0018173.1	GO:0003700(DNA binding transcription factor activity);GO:0005634(nucleus);GO:0006355(regulation of transcription, DNA-templated)	04933(AGE-RAGE signaling pathway in diabetic complications)	K06236		GARP-G2-like	MYB11 [Eriobotrya japonica]	mrna	5.60448	3.98888	3.71637	18.7378	20.6483	16.0202	0.24022	-2.05757	1.06618e-23	9.55179e-23	down	yes
EVM0015822	EVM0015822		EVM0015822.1	GO:0003677(DNA binding);GO:0003700(DNA binding transcription factor activity);GO:0005515(protein binding);GO:0005634(nucleus);GO:0006351(transcription, DNA-templated);GO:0006355(regulation of transcription, DNA-templated);GO:0009266(response to temperature stimulus);GO:0009740(gibberellic acid mediated signaling pathway);GO:0009908(flower development);GO:0010452(histone H3-K36 methylation);GO:004…	04075(Plant hormone signal transduction)	K14491		GARP-G2-like	hypothetical protein DVH24_042205 [Malus domestica]	mrna	4.99052	4.51212	3.92946	13.2548	13.8156	13.2202	0.333381	-1.58476	1.19231e-22	1.01476e-21	down	yes
EVM0034829	EVM0034829		EVM0034829.1	GO:0005634(nucleus);GO:0006355(regulation of transcription, DNA-templated);GO:0044212(transcription regulatory region DNA binding)	04075(Plant hormone signal transduction)	K14491		GARP-G2-like	PREDICTED: probable transcription factor KAN2 isoform X2 [Pyrus x bretschneideri]	mrna	5.44344	5.58333	4.75566	13.1791	14.7943	11.8349	0.396461	-1.33475	2.39214e-19	1.73213e-18	down	yes
EVM0019770	EVM0019770		EVM0019770.1	GO:0005634(nucleus);GO:0006355(regulation of transcription, DNA-templated);GO:0044212(transcription regulatory region DNA binding)	04075(Plant hormone signal transduction)	K14491		GARP-G2-like	PREDICTED: probable transcription factor KAN4 [Pyrus x bretschneideri]	mrna	0.961293	0.678965	0.510482	4.52861	4.93769	3.41886	0.166916	-2.58281	1.82895e-13	9.21873e-13	down	yes
EVM0025423	EVM0025423		EVM0025423.1	GO:0005634(nucleus);GO:0006355(regulation of transcription, DNA-templated);GO:0044212(transcription regulatory region DNA binding)	04933(AGE-RAGE signaling pathway in diabetic complications)	K06236		GARP-G2-like	PREDICTED: putative Myb family transcription factor At1g14600 [Pyrus x bretschneideri]	mrna	5.89968	7.92504	8.34256	20.5002	18.9015	17.6567	0.388502	-1.36401	1.13346e-11	5.04214e-11	down	yes
EVM0011107	EVM0011107		EVM0011107.1	GO:0003677(DNA binding);GO:0003700(DNA binding transcription factor activity);GO:0005515(protein binding);GO:0005634(nucleus);GO:0006351(transcription, DNA-templated);GO:0006355(regulation of transcription, DNA-templated)	04933(AGE-RAGE signaling pathway in diabetic complications)	K06236		GARP-G2-like	PREDICTED: myb-related protein 1-like [Pyrus x bretschneideri]	mrna	0.790026	1.03281	1.41973	0.059493	0.124147	0.148748	9.75538	3.2862	2.00312e-11	8.7407e-11	up	yes
EVM0038204	EVM0038204		EVM0038204.1	GO:0005634(nucleus);GO:0006355(regulation of transcription, DNA-templated);GO:0044212(transcription regulatory region DNA binding)	04075(Plant hormone signal transduction)	K14491		GARP-G2-like	PREDICTED: probable transcription factor KAN4 [Pyrus x bretschneideri]	mrna	2.1607	2.06207	3.82911	11.7735	10.4	8.64881	0.261235	-1.93658	3.05099e-11	1.31393e-10	down	yes
EVM0002115	EVM0002115		EVM0002115.1	GO:0003677(DNA binding);GO:0003700(DNA binding transcription factor activity);GO:0005634(nucleus);GO:0006351(transcription, DNA-templated);GO:0006355(regulation of transcription, DNA-templated)	04933(AGE-RAGE signaling pathway in diabetic complications)	K06236		GARP-G2-like	PREDICTED: uncharacterized protein LOC103421741 isoform X1 [Malus domestica]	mrna	0.069909	0.031408	0	0.679175	0.850033	0.414613	0.0521226	-4.26195	6.59792e-07	1.94263e-06	down	yes
EVM0022900	EVM0022900		EVM0022900.1	GO:0003677(DNA binding);GO:0003700(DNA binding transcription factor activity);GO:0005515(protein binding);GO:0005634(nucleus);GO:0006351(transcription, DNA-templated);GO:0006355(regulation of transcription, DNA-templated)	04933(AGE-RAGE signaling pathway in diabetic complications)	K06236		GARP-G2-like	PREDICTED: two-component response regulator ORR24-like [Pyrus x bretschneideri]	mrna	0.656585	1.06242	1.23238	0.116638	0.164745	0.298093	5.09321	2.34858	1.7917e-05	4.54314e-05	up	yes
EVM0032402	EVM0032402		EVM0032402.1	GO:0003677(DNA binding);GO:0003700(DNA binding transcription factor activity);GO:0005515(protein binding);GO:0005634(nucleus);GO:0006351(transcription, DNA-templated);GO:0006355(regulation of transcription, DNA-templated);GO:0009266(response to temperature stimulus);GO:0009740(gibberellic acid mediated signaling pathway);GO:0009908(flower development);GO:0010452(histone H3-K36 methylation);GO:004…	04933(AGE-RAGE signaling pathway in diabetic complications)	K06236		GARP-G2-like	PREDICTED: myb family transcription factor EFM-like [Pyrus x bretschneideri]	mrna	2.76479	2.7899	2.88246	8.74401	6.7181	4.35341	0.425785	-1.2318	2.01277e-05	5.07604e-05	down	yes
EVM0019641	EVM0019641		EVM0019641.1	GO:0003677(DNA binding);GO:0003700(DNA binding transcription factor activity);GO:0005634(nucleus);GO:0006351(transcription, DNA-templated);GO:0006355(regulation of transcription, DNA-templated)	04933(AGE-RAGE signaling pathway in diabetic complications)	K06236		GARP-G2-like	PREDICTED: transcription repressor KAN1-like isoform X1 [Pyrus x bretschneideri]	mrna	0.508039	0.307625	0.611282	0	0.130853	0	10.905	3.44691	0.00226978	0.00441528	up	yes
EVM0013864	EVM0013864		EVM0013864.1	GO:0005634(nucleus);GO:0006355(regulation of transcription, DNA-templated);GO:0044212(transcription regulatory region DNA binding)	04075(Plant hormone signal transduction)	K14491		GARP-G2-like	PREDICTED: putative Myb family transcription factor At1g14600 [Pyrus x bretschneideri]	mrna	0.731115	0.820541	1.32761	0.126841	0.173328	0.407408	4.06919	2.02474	0.0027806	0.00533242	up	yes
EVM0040084	EVM0040084		EVM0040084.1	GO:0005634(nucleus);GO:0006355(regulation of transcription, DNA-templated);GO:0044212(transcription regulatory region DNA binding)	04075(Plant hormone signal transduction)	K14491		GARP-G2-like	hypothetical protein DVH24_016956 [Malus domestica]	mrna	1.12818	0.626429	0.637677	1.94127	1.46987	1.62742	0.474795	-1.07462	0.0273103	0.0440046	down	yes
EVM0036598	EVM0036598		EVM0036598.1	GO:0005634(nucleus);GO:0006355(regulation of transcription, DNA-templated);GO:0043565(sequence-specific DNA binding)				GeBP	hypothetical protein DVH24_015303 [Malus domestica]	mrna	33.6366	35.7128	35.3261	14.3722	15.9351	14.022	2.36132	1.23959	6.66073e-44	1.26395e-42	up	yes
EVM0040261	EVM0040261		EVM0040261.1	GO:0005634(nucleus);GO:0005730(nucleolus);GO:0005829(cytosol);GO:0006351(transcription, DNA-templated);GO:0006355(regulation of transcription, DNA-templated);GO:0009507(chloroplast);GO:0019760(glucosinolate metabolic process);GO:0043565(sequence-specific DNA binding);GO:0044212(transcription regulatory region DNA binding)				GeBP	PREDICTED: STOREKEEPER protein-like [Pyrus x bretschneideri]	mrna	28.3157	29.2531	32.8392	14.9034	12.941	12.0964	2.26355	1.17859	4.73948e-26	4.73808e-25	up	yes
EVM0022830	EVM0022830		EVM0022830.1	GO:0005515(protein binding);GO:0005634(nucleus);GO:0005730(nucleolus);GO:0006351(transcription, DNA-templated);GO:0006355(regulation of transcription, DNA-templated)				GeBP	PREDICTED: mediator-associated protein 1-like, partial [Malus domestica]	mrna	9.10688	9.05838	9.68333	1.3244	1.53093	0.558163	8.15841	3.02829	7.192e-25	6.82679e-24	up	yes
EVM0035401	EVM0035401		EVM0035401.1	GO:0006474(N-terminal protein amino acid acetylation);GO:0008080(N-acetyltransferase activity)				GNAT	PREDICTED: uncharacterized protein LOC103928037 [Pyrus x bretschneideri]	mrna	16.688	13.7626	19.1612	1.27623	1.1367	1.46537	12.7921	3.67718	1.00687e-59	3.03354e-58	up	yes
EVM0015652	EVM0015652		EVM0015652.2	GO:0006475(internal protein amino acid acetylation);GO:0017198(N-terminal peptidyl-serine acetylation);GO:0018002(N-terminal peptidyl-glutamic acid acetylation);GO:0022626(cytosolic ribosome);GO:0031415(NatA complex);GO:1990189(peptide-serine-N-acetyltransferase activity);GO:1990190(peptide-glutamate-N-acetyltransferase activity)				GNAT	PREDICTED: N-alpha-acetyltransferase daf-31-like [Pyrus x bretschneideri]	mrna	7.51714	6.55269	6.44897	32.2914	30.2298	30.3076	0.221039	-2.17763	1.04705e-59	3.14951e-58	down	yes
EVM0004748	EVM0004748		EVM0004748.1	GO:0006474(N-terminal protein amino acid acetylation);GO:0008080(N-acetyltransferase activity)				GNAT	PREDICTED: uncharacterized protein LOC103959237 [Pyrus x bretschneideri]	mrna	41.0199	41.1589	44.4691	5.89438	7.73123	4.66265	6.92509	2.79183	7.86094e-59	2.31231e-57	up	yes
EVM0039245	EVM0039245		EVM0039245.1	GO:0005737(cytoplasm);GO:0006591(ornithine metabolic process);GO:0008080(N-acetyltransferase activity);GO:0009507(chloroplast)				GNAT	PREDICTED: probable acetyltransferase NATA1-like [Pyrus x bretschneideri]	mrna	123.923	147.202	157.805	63.5233	69.6363	60.4975	2.2149	1.14724	3.82307e-28	4.16249e-27	up	yes
EVM0005697	EVM0005697		EVM0005697.1	GO:0004596(peptide alpha-N-acetyltransferase activity);GO:0006474(N-terminal protein amino acid acetylation);GO:0031248(protein acetyltransferase complex)				GNAT	PREDICTED: N-alpha-acetyltransferase 50 [Pyrus x bretschneideri]	mrna	2.23431	2.28135	2.45859	12.1495	16.0507	17.506	0.152589	-2.71228	1.78053e-25	1.7385e-24	down	yes
EVM0002023	EVM0002023		EVM0002023.1	GO:0004596(peptide alpha-N-acetyltransferase activity);GO:0006474(N-terminal protein amino acid acetylation);GO:0031248(protein acetyltransferase complex)				GNAT	PREDICTED: uncharacterized protein LOC103936641 [Pyrus x bretschneideri]	mrna	9.72839	8.42468	7.79771	3.36218	4.70402	3.59684	2.22504	1.15383	9.03203e-12	4.04974e-11	up	yes
EVM0018156	EVM0018156		EVM0018156.1	GO:0004596(peptide alpha-N-acetyltransferase activity);GO:0006474(N-terminal protein amino acid acetylation);GO:0031417(NatC complex)				GNAT	PREDICTED: N-alpha-acetyltransferase MAK3-like [Pyrus x bretschneideri]	mrna	6.67271	8.28525	8.16624	15.2854	14.8042	16.5941	0.495337	-1.01352	6.14174e-07	1.81247e-06	down	yes
EVM0035899	EVM0035899		EVM0035899.1	GO:0006474(N-terminal protein amino acid acetylation);GO:0008080(N-acetyltransferase activity)				GNAT	PREDICTED: uncharacterized protein LOC103928052 [Pyrus x bretschneideri]	mrna	0.43259	1.08492	1.35135	3.59136	4.45738	3.76142	0.242915	-2.04148	1.6061e-05	4.09592e-05	down	yes
EVM0016636	EVM0016636		EVM0016636.1	GO:0000123(histone acetyltransferase complex);GO:0002098(tRNA wobble uridine modification);GO:0004402(histone acetyltransferase activity);GO:0005737(cytoplasm);GO:0006357(regulation of transcription by RNA polymerase II);GO:0006368(transcription elongation from RNA polymerase II promoter);GO:0008023(transcription elongation factor complex);GO:0033588(Elongator holoenzyme complex)				GNAT	PREDICTED: elongator complex protein 3 [Pyrus x bretschneideri]	mrna	0.124196	0	0	2.29101	1.86764	1.97728	0.0202407	-5.62659	0.00161053	0.00319984	down	yes
EVM0028454	EVM0028454		EVM0028454.1	GO:0006474(N-terminal protein amino acid acetylation);GO:0008080(N-acetyltransferase activity)				GNAT	PREDICTED: uncharacterized N-acetyltransferase p20-like [Malus domestica]	mrna	0.037577	0.06104	0	0.132206	0.830204	0.689712	0.0596911	-4.06634	0.0093185	0.0163485	down	yes
EVM0027759	EVM0027759		EVM0027759.1	GO:0004596(peptide alpha-N-acetyltransferase activity);GO:0006474(N-terminal protein amino acid acetylation);GO:0031248(protein acetyltransferase complex)				GNAT	hypothetical protein DVH24_030152 [Malus domestica]	mrna	0.872837	0.705746	1.19156	0.674221	0.336113	0.300953	2.11254	1.07898	0.0139127	0.0236246	up	yes
EVM0028748	EVM0028748		EVM0028748.1	GO:0003700(DNA binding transcription factor activity);GO:0005634(nucleus);GO:0006355(regulation of transcription, DNA-templated);GO:0008356(asymmetric cell division);GO:0009630(gravitropism);GO:0009956(radial pattern formation);GO:0043565(sequence-specific DNA binding);GO:0048366(leaf development);GO:0051457(maintenance of protein location in nucleus);GO:0090610(bundle sheath cell fate specificat…	04075(Plant hormone signal transduction)	K14494		GRAS	PREDICTED: protein SCARECROW 2-like [Pyrus x bretschneideri]	mrna	2.56217	2.56415	2.53263	19.6636	20.4914	15.9261	0.136569	-2.8723	2.79114e-96	1.87767e-94	down	yes
EVM0031199	EVM0031199		EVM0031199.1	GO:0003700(DNA binding transcription factor activity);GO:0005634(nucleus);GO:0006355(regulation of transcription, DNA-templated);GO:0043565(sequence-specific DNA binding)	04075(Plant hormone signal transduction)	K14494		GRAS	PREDICTED: scarecrow-like protein 11 [Pyrus x bretschneideri]	mrna	20.2528	16.2495	20.7836	3.40524	2.85756	2.88492	6.26231	2.64669	7.52607e-81	3.71017e-79	up	yes
EVM0035367	EVM0035367		EVM0035367.1	GO:0003700(DNA binding transcription factor activity);GO:0005634(nucleus);GO:0006355(regulation of transcription, DNA-templated);GO:0043565(sequence-specific DNA binding)	04075(Plant hormone signal transduction)	K14494		GRAS	PREDICTED: scarecrow-like protein 21 [Pyrus x bretschneideri]	mrna	70.532	67.28	60.4606	21.6067	20.6719	17.5979	3.31136	1.72742	4.44263e-70	1.73374e-68	up	yes
EVM0035133	EVM0035133		EVM0035133.1	GO:0003700(DNA binding transcription factor activity);GO:0005634(nucleus);GO:0006355(regulation of transcription, DNA-templated);GO:0008356(asymmetric cell division);GO:0009630(gravitropism);GO:0009956(radial pattern formation);GO:0043565(sequence-specific DNA binding);GO:0048366(leaf development);GO:0051457(maintenance of protein location in nucleus);GO:0090610(bundle sheath cell fate specificat…	04075(Plant hormone signal transduction)	K14494		GRAS	PREDICTED: protein SCARECROW 2-like [Pyrus x bretschneideri]	mrna	3.33026	2.80524	3.40247	21.0686	20.414	15.7029	0.16679	-2.5839	2.30465e-64	7.78007e-63	down	yes
EVM0038799	EVM0038799		EVM0038799.1	GO:0003700(DNA binding transcription factor activity);GO:0005634(nucleus);GO:0006355(regulation of transcription, DNA-templated);GO:0043565(sequence-specific DNA binding)	04075(Plant hormone signal transduction)	K14494		GRAS	PREDICTED: scarecrow-like protein 9 [Pyrus x bretschneideri]	mrna	12.8267	14.0744	16.2057	3.57657	3.00198	3.03735	4.48287	2.16442	5.21623e-63	1.70231e-61	up	yes
EVM0030052	EVM0030052		EVM0030052.1	GO:0003700(DNA binding transcription factor activity);GO:0005634(nucleus);GO:0006355(regulation of transcription, DNA-templated);GO:0009723(response to ethylene);GO:0009737(response to abscisic acid);GO:0009863(salicylic acid mediated signaling pathway);GO:0009867(jasmonic acid mediated signaling pathway);GO:0009938(negative regulation of gibberellic acid mediated signaling pathway);GO:0010187(ne…	04075(Plant hormone signal transduction)	K14494		GRAS	PREDICTED: DELLA protein GAI-like [Pyrus x bretschneideri]	mrna	12.0054	9.30786	9.48666	42.2714	39.5608	41.803	0.24912	-2.00509	2.83579e-55	7.59246e-54	down	yes
EVM0022206	EVM0022206		EVM0022206.1	GO:0003700(DNA binding transcription factor activity);GO:0005634(nucleus);GO:0006355(regulation of transcription, DNA-templated);GO:0043565(sequence-specific DNA binding)	04075(Plant hormone signal transduction)	K14494		GRAS	PREDICTED: scarecrow-like protein 33 [Pyrus x bretschneideri]	mrna	19.8204	14.5114	15.6101	3.38237	3.76003	2.69629	5.07606	2.34371	1.70494e-49	3.85099e-48	up	yes
EVM0031629	EVM0031629		EVM0031629.1	GO:0003700(DNA binding transcription factor activity);GO:0005634(nucleus);GO:0006355(regulation of transcription, DNA-templated);GO:0009739(response to gibberellin);GO:0043565(sequence-specific DNA binding)	04075(Plant hormone signal transduction)	K14494		GRAS	PREDICTED: scarecrow-like protein 3 [Pyrus x bretschneideri]	mrna	3.17097	3.37874	3.49932	0.155288	0.310604	0.172126	15.7504	3.97732	2.49231e-46	5.15174e-45	up	yes
EVM0034194	EVM0034194		EVM0034194.1	GO:0003700(DNA binding transcription factor activity);GO:0005634(nucleus);GO:0006355(regulation of transcription, DNA-templated);GO:0043565(sequence-specific DNA binding)	04075(Plant hormone signal transduction)	K14494		GRAS	PREDICTED: scarecrow-like protein 33 [Pyrus x bretschneideri]	mrna	5.81722	5.16603	5.90032	1.42895	1.40824	1.43827	3.94895	1.98147	3.72618e-43	6.909e-42	up	yes
EVM0038503	EVM0038503		EVM0038503.1	GO:0003700(DNA binding transcription factor activity);GO:0005634(nucleus);GO:0006355(regulation of transcription, DNA-templated);GO:0043565(sequence-specific DNA binding)	04075(Plant hormone signal transduction)	K14494		GRAS	PREDICTED: scarecrow-like protein 13 [Pyrus x bretschneideri]	mrna	61.7385	54.6449	55.7144	21.5279	26.64	24.3931	2.37177	1.24596	3.27569e-41	5.74502e-40	up	yes
EVM0036665	EVM0036665		EVM0036665.1	GO:0003700(DNA binding transcription factor activity);GO:0005634(nucleus);GO:0006355(regulation of transcription, DNA-templated);GO:0043565(sequence-specific DNA binding)	04075(Plant hormone signal transduction)	K14494		GRAS	PREDICTED: scarecrow-like protein 4 [Pyrus x bretschneideri]	mrna	10.3505	8.12495	9.55218	34.7661	31.0586	30.0119	0.292452	-1.77373	1.83111e-40	3.11899e-39	down	yes
EVM0015525	EVM0015525		EVM0015525.1	GO:0003700(DNA binding transcription factor activity);GO:0005634(nucleus);GO:0006355(regulation of transcription, DNA-templated);GO:0008356(asymmetric cell division);GO:0009630(gravitropism);GO:0009956(radial pattern formation);GO:0043565(sequence-specific DNA binding);GO:0048366(leaf development);GO:0051457(maintenance of protein location in nucleus);GO:0090610(bundle sheath cell fate specificat…	04075(Plant hormone signal transduction)	K14494		GRAS	PREDICTED: protein SCARECROW 2-like [Pyrus x bretschneideri]	mrna	1.1398	1.30816	1.81132	15.0286	12.9333	11.3666	0.1083	-3.20689	2.82294e-38	4.46933e-37	down	yes
EVM0037924	EVM0037924		EVM0037924.1	GO:0003700(DNA binding transcription factor activity);GO:0005634(nucleus);GO:0006355(regulation of transcription, DNA-templated);GO:0043565(sequence-specific DNA binding)	04075(Plant hormone signal transduction)	K14494		GRAS	PREDICTED: LOW QUALITY PROTEIN: scarecrow-like protein 14 [Pyrus x bretschneideri]	mrna	15.9355	16.7063	17.0997	7.57059	7.1804	6.74246	2.31426	1.21055	5.89326e-38	9.2284e-37	up	yes
EVM0041217	EVM0041217		EVM0041217.3	GO:0003700(DNA binding transcription factor activity);GO:0005634(nucleus);GO:0006355(regulation of transcription, DNA-templated);GO:0043565(sequence-specific DNA binding)				GRAS	PREDICTED: scarecrow-like protein 1 isoform X1 [Pyrus x bretschneideri]	mrna	23.7954	20.2121	20.8754	9.85302	9.8981	8.8236	2.27064	1.1831	6.96751e-35	9.79895e-34	up	yes
EVM0028988	EVM0028988		EVM0028988.1	GO:0003700(DNA binding transcription factor activity);GO:0005634(nucleus);GO:0006355(regulation of transcription, DNA-templated);GO:0030154(cell differentiation);GO:0043565(sequence-specific DNA binding);GO:0048831(regulation of shoot system development)	04075(Plant hormone signal transduction)	K14494		GRAS	PREDICTED: scarecrow-like protein 15 [Pyrus x bretschneideri]	mrna	3.40878	2.22264	2.58139	14.4799	12.4553	9.9464	0.22268	-2.16695	2.50786e-25	2.4283e-24	down	yes
EVM0007592	EVM0007592		EVM0007592.1	GO:0003700(DNA binding transcription factor activity);GO:0005634(nucleus);GO:0006355(regulation of transcription, DNA-templated);GO:0043565(sequence-specific DNA binding)	04075(Plant hormone signal transduction)	K14494		GRAS	PREDICTED: scarecrow-like protein 28 [Pyrus x bretschneideri]	mrna	4.11718	2.84117	3.55107	14.4463	13.5067	10.3935	0.274064	-1.86742	5.40905e-24	4.92163e-23	down	yes
EVM0006282	EVM0006282		EVM0006282.1	GO:0003700(DNA binding transcription factor activity);GO:0005634(nucleus);GO:0006355(regulation of transcription, DNA-templated);GO:0043565(sequence-specific DNA binding)	04075(Plant hormone signal transduction)	K14494		GRAS	PREDICTED: scarecrow-like protein 28 [Pyrus x bretschneideri]	mrna	9.27567	5.09731	8.10627	34.3299	34.2826	26.5964	0.236104	-2.0825	3.97371e-23	3.45938e-22	down	yes
EVM0004708	EVM0004708		EVM0004708.1	GO:0003700(DNA binding transcription factor activity);GO:0005634(nucleus);GO:0006355(regulation of transcription, DNA-templated);GO:0008356(asymmetric cell division);GO:0009956(radial pattern formation);GO:0043565(sequence-specific DNA binding);GO:0045930(negative regulation of mitotic cell cycle);GO:0048366(leaf development);GO:0055072(iron ion homeostasis)	04075(Plant hormone signal transduction)	K14494		GRAS	PREDICTED: LOW QUALITY PROTEIN: protein SHORT-ROOT-like [Malus domestica]	mrna	3.0172	2.6328	2.81202	9.50773	10.5097	8.10266	0.300925	-1.73253	1.98874e-22	1.67499e-21	down	yes
EVM0022406	EVM0022406		EVM0022406.1	GO:0003700(DNA binding transcription factor activity);GO:0005634(nucleus);GO:0006355(regulation of transcription, DNA-templated);GO:0043565(sequence-specific DNA binding)	04075(Plant hormone signal transduction)	K14494		GRAS	PREDICTED: scarecrow-like protein 14 [Pyrus x bretschneideri]	mrna	9.14726	8.09028	8.99332	4.55037	3.9554	3.61008	2.165	1.11437	1.75937e-21	1.41559e-20	up	yes
EVM0009082	EVM0009082		EVM0009082.1	GO:0003700(DNA binding transcription factor activity);GO:0005634(nucleus);GO:0006355(regulation of transcription, DNA-templated);GO:0043565(sequence-specific DNA binding)	04075(Plant hormone signal transduction)	K14494		GRAS	PREDICTED: scarecrow-like protein 14 [Pyrus x bretschneideri]	mrna	1.03374	0.679241	0.883563	4.72879	3.69014	3.82635	0.212044	-2.23756	5.88578e-19	4.17585e-18	down	yes
EVM0025646	EVM0025646		EVM0025646.1	GO:0003700(DNA binding transcription factor activity);GO:0005634(nucleus);GO:0006355(regulation of transcription, DNA-templated);GO:0043565(sequence-specific DNA binding)	04075(Plant hormone signal transduction)	K14494		GRAS	PREDICTED: scarecrow-like protein 4 [Pyrus x bretschneideri]	mrna	0.051116	0	0	2.40445	1.72695	2.04457	0.00827659	-6.91675	2.26102e-18	1.54901e-17	down	yes
EVM0023743	EVM0023743		EVM0023743.1	GO:0003700(DNA binding transcription factor activity);GO:0005634(nucleus);GO:0006355(regulation of transcription, DNA-templated);GO:0043565(sequence-specific DNA binding)	04075(Plant hormone signal transduction)	K14494		GRAS	PREDICTED: scarecrow-like protein 11 [Pyrus x bretschneideri]	mrna	1.26227	1.64534	2.14035	0.082462	0.221476	0.204801	9.9225	3.3107	2.04245e-16	1.2442e-15	up	yes
EVM0016024	EVM0016024		EVM0016024.1	GO:0003700(DNA binding transcription factor activity);GO:0005634(nucleus);GO:0006355(regulation of transcription, DNA-templated);GO:0043565(sequence-specific DNA binding);GO:0048366(leaf development);GO:0090610(bundle sheath cell fate specification)	04075(Plant hormone signal transduction)	K14494		GRAS	PREDICTED: scarecrow-like protein 23 [Pyrus x bretschneideri]	mrna	3.12848	3.23872	2.55498	7.97378	8.67308	8.77933	0.350905	-1.51085	5.38497e-16	3.20493e-15	down	yes
EVM0011968	EVM0011968		EVM0011968.1	GO:0003700(DNA binding transcription factor activity);GO:0005634(nucleus);GO:0006355(regulation of transcription, DNA-templated);GO:0043565(sequence-specific DNA binding)	04075(Plant hormone signal transduction)	K14494		GRAS	PREDICTED: scarecrow-like protein 9 [Pyrus x bretschneideri]	mrna	5.77829	6.18893	7.77925	2.86952	2.75472	2.39234	2.4632	1.30054	6.54364e-16	3.87533e-15	up	yes
EVM0027008	EVM0027008		EVM0027008.1	GO:0003700(DNA binding transcription factor activity);GO:0005634(nucleus);GO:0006355(regulation of transcription, DNA-templated);GO:0030154(cell differentiation);GO:0043565(sequence-specific DNA binding);GO:0048831(regulation of shoot system development)	04075(Plant hormone signal transduction)	K14494		GRAS	PREDICTED: scarecrow-like protein 15 [Pyrus x bretschneideri]	mrna	7.60286	6.13464	6.3721	21.903	20.3921	13.7481	0.358823	-1.47865	1.38941e-13	7.0721e-13	down	yes
EVM0003808	EVM0003808		EVM0003808.1	GO:0003700(DNA binding transcription factor activity);GO:0005634(nucleus);GO:0006355(regulation of transcription, DNA-templated);GO:0010492(maintenance of shoot apical meristem identity);GO:0043565(sequence-specific DNA binding);GO:0048768(root hair cell tip growth);GO:0051301(cell division)	04075(Plant hormone signal transduction)	K14494		GRAS	PREDICTED: scarecrow-like protein 27 [Pyrus x bretschneideri]	mrna	10.8439	9.1985	10.16	5.42781	5.42999	3.60403	2.08842	1.06241	3.90362e-12	1.79632e-11	up	yes
EVM0006717	EVM0006717		EVM0006717.1	GO:0003700(DNA binding transcription factor activity);GO:0005634(nucleus);GO:0006355(regulation of transcription, DNA-templated);GO:0043565(sequence-specific DNA binding)	04075(Plant hormone signal transduction)	K14494		GRAS	hypothetical protein DVH24_032452 [Malus domestica]	mrna	6.18445	3.97846	4.56202	13.0911	11.8829	10.6343	0.413525	-1.27395	8.10633e-10	3.09322e-09	down	yes
EVM0034246	EVM0034246		EVM0034246.1	GO:0003700(DNA binding transcription factor activity);GO:0005634(nucleus);GO:0006355(regulation of transcription, DNA-templated);GO:0043565(sequence-specific DNA binding)	04075(Plant hormone signal transduction)	K14494		GRAS	PREDICTED: DELLA protein RGL1-like [Pyrus x bretschneideri]	mrna	0.336931	0.355455	0.655808	0	0	0	4493.98	12.1338	1.32457e-09	4.9494e-09	up	yes
EVM0003601	EVM0003601		EVM0003601.1	GO:0003700(DNA binding transcription factor activity);GO:0005634(nucleus);GO:0006355(regulation of transcription, DNA-templated);GO:0043565(sequence-specific DNA binding)	04075(Plant hormone signal transduction)	K14494		GRAS	PREDICTED: scarecrow-like protein 9 [Pyrus x bretschneideri]	mrna	1.40595	1.26653	1.55166	0.116801	0.421281	0.190235	5.79987	2.53602	1.4302e-09	5.32647e-09	up	yes
EVM0026450	EVM0026450		EVM0026450.1	GO:0003700(DNA binding transcription factor activity);GO:0005634(nucleus);GO:0006355(regulation of transcription, DNA-templated);GO:0043565(sequence-specific DNA binding)	04075(Plant hormone signal transduction)	K14494		GRAS	PREDICTED: protein SHORT-ROOT-like [Pyrus x bretschneideri]	mrna	5.1008	2.5888	2.1904	13.1855	11.9454	8.98438	0.289606	-1.78784	1.2845e-08	4.41745e-08	down	yes
EVM0013909	EVM0013909		EVM0013909.1	GO:0003700(DNA binding transcription factor activity);GO:0005634(nucleus);GO:0006355(regulation of transcription, DNA-templated);GO:0043565(sequence-specific DNA binding)	04075(Plant hormone signal transduction)	K14494		GRAS	PREDICTED: protein SHORT-ROOT-like [Pyrus x bretschneideri]	mrna	0.250374	0.061914	0.089711	1.18275	1.09165	1.21129	0.115328	-3.11618	2.53249e-08	8.48468e-08	down	yes
EVM0020342	EVM0020342		EVM0020342.1	GO:0003700(DNA binding transcription factor activity);GO:0005634(nucleus);GO:0006355(regulation of transcription, DNA-templated);GO:0043565(sequence-specific DNA binding)				GRAS	PREDICTED: scarecrow-like protein 32 [Pyrus x bretschneideri]	mrna	0	0.048763	0	0.470199	0.415289	0.56082	0.0337155	-4.89044	9.17423e-06	2.40379e-05	down	yes
EVM0010353	EVM0010353		EVM0010353.1	GO:0003700(DNA binding transcription factor activity);GO:0005634(nucleus);GO:0006355(regulation of transcription, DNA-templated);GO:0030154(cell differentiation);GO:0043565(sequence-specific DNA binding)	00010(Glycolysis / Gluconeogenesis);00030(Pentose phosphate pathway);00051(Fructose and mannose metabolism);00710(Carbon fixation in photosynthetic organisms)	K01623	EC:4.1.2.13	GRAS	PREDICTED: uncharacterized protein LOC103939060 [Pyrus x bretschneideri]	mrna	0.590228	0.312442	0.96913	0	0	0	6239.33	12.6072	1.39519e-05	3.58725e-05	up	yes
EVM0025263	EVM0025263		EVM0025263.1	GO:0003700(DNA binding transcription factor activity);GO:0005634(nucleus);GO:0006355(regulation of transcription, DNA-templated);GO:0010014(meristem initiation);GO:0043565(sequence-specific DNA binding)	04075(Plant hormone signal transduction)	K14494		GRAS	PREDICTED: scarecrow-like protein 18 [Pyrus x bretschneideri]	mrna	0.115955	0.050467	0.042068	0.869109	0.857816	0.274546	0.104168	-3.26301	6.69522e-05	0.000159125	down	yes
EVM0018837	EVM0018837		EVM0018837.1	GO:0003700(DNA binding transcription factor activity);GO:0005634(nucleus);GO:0006355(regulation of transcription, DNA-templated);GO:0043565(sequence-specific DNA binding)	04075(Plant hormone signal transduction)	K14494		GRAS	PREDICTED: protein SCARECROW-like [Pyrus x bretschneideri]	mrna	0.097893	0.13364	0.275673	0	0	0	1690.69	10.7234	8.41511e-05	0.00019772	up	yes
EVM0041916	EVM0041916		EVM0041916.1	GO:0003700(DNA binding transcription factor activity);GO:0005634(nucleus);GO:0006355(regulation of transcription, DNA-templated);GO:0043565(sequence-specific DNA binding)	04075(Plant hormone signal transduction)	K14494		GRAS	PREDICTED: scarecrow-like protein 30 [Pyrus x bretschneideri]	mrna	0.686234	0.619715	0.716468	1.3848	1.70778	1.5604	0.434649	-1.20208	8.87318e-05	0.000207775	down	yes
EVM0020626	EVM0020626		EVM0020626.1	GO:0003700(DNA binding transcription factor activity);GO:0005634(nucleus);GO:0006355(regulation of transcription, DNA-templated);GO:0043565(sequence-specific DNA binding)	04075(Plant hormone signal transduction)	K14494		GRAS	PREDICTED: scarecrow-like protein 3 [Pyrus x bretschneideri]	mrna	1.21555	1.07551	1.98016	0.485414	0.355492	0.808908	2.58891	1.37234	0.000205087	0.00045931	up	yes
EVM0017171	EVM0017171		EVM0017171.1	GO:0003700(DNA binding transcription factor activity);GO:0005634(nucleus);GO:0006355(regulation of transcription, DNA-templated);GO:0043565(sequence-specific DNA binding)	04075(Plant hormone signal transduction)	K14494		GRAS	PREDICTED: nodulation-signaling pathway 2 protein-like [Malus domestica]	mrna	0.020452	0	0	0.280522	0.022178	0.15063	0.045115	-4.47025	0.0121536	0.0208879	down	yes
EVM0007730	EVM0007730		EVM0007730.1	GO:0003700(DNA binding transcription factor activity);GO:0005634(nucleus);GO:0006355(regulation of transcription, DNA-templated);GO:0043565(sequence-specific DNA binding)	04075(Plant hormone signal transduction)	K14494		GRAS	PREDICTED: scarecrow-like protein 3 [Pyrus x bretschneideri]	mrna	1.39891	0.40039	0.676776	2.26553	1.88448	1.37622	0.448058	-1.15824	0.0200994	0.0331702	down	yes
EVM0027320	EVM0027320		EVM0027320.1	GO:0005515(protein binding);GO:0005524(ATP binding);GO:0005634(nucleus);GO:0006351(transcription, DNA-templated);GO:0006355(regulation of transcription, DNA-templated);GO:0009624(response to nematode);GO:0019760(glucosinolate metabolic process);GO:0043565(sequence-specific DNA binding);GO:0048364(root development);GO:0048366(leaf development);GO:0061062(regulation of nematode larval development)	00010(Glycolysis / Gluconeogenesis);00051(Fructose and mannose metabolism);00562(Inositol phosphate metabolism);00710(Carbon fixation in photosynthetic organisms)	K01803	EC:5.3.1.1	GRF	PREDICTED: growth-regulating factor 1-like [Pyrus x bretschneideri]	mrna	3.48085	3.4287	3.23488	21.3028	20.7161	16.7612	0.172583	-2.53464	2.21834e-69	8.54969e-68	down	yes
EVM0024790	EVM0024790		EVM0024790.1	GO:0005634(nucleus);GO:0009739(response to gibberellin);GO:0030912(response to deep water)				GRF	hypothetical protein DVH24_029510 [Malus domestica]	mrna	1.96549	1.18701	1.21868	9.92612	10.211	7.408	0.158692	-2.6557	5.81561e-23	5.01601e-22	down	yes
EVM0017229	EVM0017229		EVM0017229.1	GO:0005634(nucleus);GO:0009739(response to gibberellin);GO:0030912(response to deep water)				GRF	PREDICTED: growth-regulating factor 5 isoform X2 [Pyrus x bretschneideri]	mrna	2.29366	1.51164	1.15774	12.2212	13.1951	9.24934	0.143169	-2.80421	3.40109e-22	2.83378e-21	down	yes
EVM0014982	EVM0014982		EVM0014982.1	GO:0005524(ATP binding);GO:0005634(nucleus);GO:0006351(transcription, DNA-templated);GO:0006355(regulation of transcription, DNA-templated);GO:0009941(chloroplast envelope);GO:0032502(developmental process);GO:0048366(leaf development)				GRF	PREDICTED: growth-regulating factor 8-like [Malus domestica]	mrna	2.15627	2.2152	1.99317	6.6876	7.41035	7.48331	0.294915	-1.76163	4.58206e-22	3.79234e-21	down	yes
EVM0033263	EVM0033263		EVM0033263.1	GO:0005524(ATP binding);GO:0005634(nucleus);GO:0006351(transcription, DNA-templated);GO:0006355(regulation of transcription, DNA-templated);GO:0009941(chloroplast envelope);GO:0032502(developmental process);GO:0048366(leaf development)				GRF	PREDICTED: growth-regulating factor 8 [Pyrus x bretschneideri]	mrna	4.43371	5.99469	5.04924	1.56137	1.52384	1.15532	3.64993	1.86787	1.04469e-21	8.49542e-21	up	yes
EVM0031051	EVM0031051		EVM0031051.1	GO:0005634(nucleus);GO:0009739(response to gibberellin);GO:0030912(response to deep water)				GRF	PREDICTED: growth-regulating factor 5 isoform X2 [Pyrus x bretschneideri]	mrna	5.09376	3.44065	2.86227	15.4969	16.8955	13.2179	0.249871	-2.00075	8.78919e-16	5.17479e-15	down	yes
EVM0005789	EVM0005789		EVM0005789.1	GO:0005515(protein binding);GO:0005524(ATP binding);GO:0005634(nucleus);GO:0006351(transcription, DNA-templated);GO:0006355(regulation of transcription, DNA-templated);GO:0048366(leaf development)				GRF	hypothetical protein DVH24_029510 [Malus domestica]	mrna	3.3518	2.34857	1.98293	10.0061	9.91583	7.99504	0.275219	-1.86135	2.591e-13	1.29165e-12	down	yes
EVM0015793	EVM0015793		EVM0015793.1	GO:0005737(cytoplasm);GO:0008757(S-adenosylmethionine-dependent methyltransferase activity);GO:0032259(methylation)				GRF	PREDICTED: growth-regulating factor 4-like [Pyrus x bretschneideri]	mrna	2.67614	2.33607	2.20676	6.40256	5.30495	6.42465	0.39813	-1.32869	9.85147e-12	4.4055e-11	down	yes
EVM0035709	EVM0035709		EVM0035709.1	GO:0005737(cytoplasm);GO:0008757(S-adenosylmethionine-dependent methyltransferase activity);GO:0032259(methylation)				GRF	PREDICTED: growth-regulating factor 4-like [Pyrus x bretschneideri]	mrna	2.32445	2.08946	2.47278	5.54453	5.73697	6.09815	0.39625	-1.33552	2.8815e-08	9.60562e-08	down	yes
EVM0012216	EVM0012216		EVM0012216.1	GO:0005515(protein binding);GO:0005524(ATP binding);GO:0005634(nucleus);GO:0006351(transcription, DNA-templated);GO:0006355(regulation of transcription, DNA-templated);GO:0009624(response to nematode);GO:0019760(glucosinolate metabolic process);GO:0043565(sequence-specific DNA binding);GO:0048364(root development);GO:0048366(leaf development);GO:0061062(regulation of nematode larval development)				GRF	PREDICTED: growth-regulating factor 1-like [Pyrus x bretschneideri]	mrna	5.52794	6.41965	6.74613	14.4383	14.526	10.3929	0.474976	-1.07407	3.36971e-08	1.11721e-07	down	yes
EVM0004374	EVM0004374		EVM0004374.1	GO:0005515(protein binding);GO:0005524(ATP binding);GO:0005634(nucleus);GO:0006351(transcription, DNA-templated);GO:0006355(regulation of transcription, DNA-templated);GO:0008285(negative regulation of cell proliferation);GO:0009624(response to nematode);GO:0043565(sequence-specific DNA binding);GO:0044212(transcription regulatory region DNA binding);GO:0048364(root development);GO:0048366(leaf d…				GRF	PREDICTED: growth-regulating factor 3-like [Pyrus x bretschneideri]	mrna	5.27787	5.89634	7.25755	13.2613	12.1027	11.5973	0.498676	-1.00383	4.11782e-07	1.23584e-06	down	yes
EVM0038785	EVM0038785		EVM0038785.1	GO:0005737(cytoplasm);GO:0008757(S-adenosylmethionine-dependent methyltransferase activity);GO:0032259(methylation)				GRF	PREDICTED: growth-regulating factor 4-like [Pyrus x bretschneideri]	mrna	3.40368	3.08569	2.68115	5.94726	6.49863	6.00914	0.496912	-1.00894	1.93272e-05	4.8811e-05	down	yes
EVM0002480	EVM0002480		EVM0002480.1	GO:0003677(DNA binding);GO:0003700(DNA binding transcription factor activity);GO:0005515(protein binding);GO:0005634(nucleus);GO:0005737(cytoplasm);GO:0006351(transcription, DNA-templated);GO:0006355(regulation of transcription, DNA-templated);GO:0009610(response to symbiotic fungus);GO:0009737(response to abscisic acid);GO:0010197(polar nucleus fusion);GO:0010201(response to continuous far red l…				HB-BELL	hypothetical protein DVH24_034810 [Malus domestica]	mrna	71.4169	70.184	73.1007	21.8861	24.38	21.2629	3.1794	1.66875	3.2445e-109	2.8121e-107	up	yes
EVM0029533	EVM0029533		EVM0029533.3	GO:0003677(DNA binding);GO:0003700(DNA binding transcription factor activity);GO:0005515(protein binding);GO:0005634(nucleus);GO:0005829(cytosol);GO:0006351(transcription, DNA-templated);GO:0006355(regulation of transcription, DNA-templated);GO:0009506(plasmodesma);GO:0048481(plant ovule development)				HB-BELL	PREDICTED: homeobox protein BEL1 homolog isoform X2 [Pyrus x bretschneideri]	mrna	9.03094	9.20149	10.4466	2.34332	2.39216	2.29528	4.07908	2.02824	2.09905e-64	7.09242e-63	up	yes
EVM0001799	EVM0001799		EVM0001799.1	GO:0003677(DNA binding);GO:0003700(DNA binding transcription factor activity);GO:0005515(protein binding);GO:0005634(nucleus);GO:0005737(cytoplasm);GO:0006351(transcription, DNA-templated);GO:0006355(regulation of transcription, DNA-templated);GO:0009610(response to symbiotic fungus);GO:0009737(response to abscisic acid);GO:0010197(polar nucleus fusion);GO:0010201(response to continuous far red l…				HB-BELL	PREDICTED: BEL1-like homeodomain protein 1 [Pyrus x bretschneideri]	mrna	102.77	117.948	120.027	45.9386	52.0781	47.9249	2.3348	1.2233	7.86709e-46	1.60481e-44	up	yes
EVM0010638	EVM0010638		EVM0010638.1	GO:0003677(DNA binding);GO:0003700(DNA binding transcription factor activity);GO:0005515(protein binding);GO:0005634(nucleus);GO:0006351(transcription, DNA-templated);GO:0006355(regulation of transcription, DNA-templated)				HB-BELL	PREDICTED: BEL1-like homeodomain protein 6 [Pyrus x bretschneideri]	mrna	23.0025	26.1231	23.9391	10.8955	10.8582	9.71261	2.322	1.21537	6.09291e-40	1.02103e-38	up	yes
EVM0027319	EVM0027319		EVM0027319.1	GO:0003677(DNA binding);GO:0003700(DNA binding transcription factor activity);GO:0005515(protein binding);GO:0005634(nucleus);GO:0005829(cytosol);GO:0006351(transcription, DNA-templated);GO:0007389(pattern specification process);GO:0010051(xylem and phloem pattern formation);GO:0010076(maintenance of floral meristem identity);GO:0010077(maintenance of inflorescence meristem identity);GO:0010089(x…				HB-BELL	PREDICTED: BEL1-like homeodomain protein 9 [Pyrus x bretschneideri]	mrna	25.8491	19.307	21.6992	7.61712	5.77998	6.93151	3.28873	1.71753	3.33693e-35	4.73768e-34	up	yes
EVM0026512	EVM0026512		EVM0026512.1	GO:0003677(DNA binding);GO:0003700(DNA binding transcription factor activity);GO:0005515(protein binding);GO:0005634(nucleus);GO:0006351(transcription, DNA-templated);GO:0006355(regulation of transcription, DNA-templated);GO:0008285(negative regulation of cell proliferation);GO:0009640(photomorphogenesis);GO:0010073(meristem maintenance);GO:0010227(floral organ abscission);GO:0010228(vegetative t…				HB-BELL	hypothetical protein DVH24_020315 [Malus domestica]	mrna	0.513322	0.664639	0.651366	3.94989	4.24896	3.09711	0.161945	-2.62642	2.79952e-21	2.23273e-20	down	yes
EVM0010273	EVM0010273		EVM0010273.1	GO:0003677(DNA binding);GO:0003700(DNA binding transcription factor activity);GO:0005634(nucleus);GO:0006351(transcription, DNA-templated);GO:0006355(regulation of transcription, DNA-templated)				HB-BELL	PREDICTED: BEL1-like homeodomain protein 11 [Pyrus x bretschneideri]	mrna	2.57206	4.61956	4.00691	14.9089	14.2487	12.8664	0.266479	-1.9079	1.78831e-16	1.09296e-15	down	yes
EVM0027757	EVM0027757		EVM0027757.1	GO:0003677(DNA binding);GO:0003700(DNA binding transcription factor activity);GO:0005515(protein binding);GO:0005634(nucleus);GO:0006351(transcription, DNA-templated);GO:0006355(regulation of transcription, DNA-templated);GO:0008285(negative regulation of cell proliferation);GO:0009640(photomorphogenesis);GO:0010073(meristem maintenance);GO:0010227(floral organ abscission);GO:0010228(vegetative t…				HB-BELL	hypothetical protein DVH24_012629 [Malus domestica]	mrna	2.4034	2.13209	2.50661	8.06044	7.42427	5.97027	0.328227	-1.60723	1.07293e-15	6.27939e-15	down	yes
EVM0002246	EVM0002246		EVM0002246.1	GO:0003677(DNA binding);GO:0003700(DNA binding transcription factor activity);GO:0005515(protein binding);GO:0005634(nucleus);GO:0006351(transcription, DNA-templated);GO:0006355(regulation of transcription, DNA-templated);GO:0008285(negative regulation of cell proliferation);GO:0009640(photomorphogenesis);GO:0010073(meristem maintenance);GO:0010227(floral organ abscission);GO:0010228(vegetative t…				HB-BELL	hypothetical protein DVH24_020315 [Malus domestica]	mrna	1.11243	0.743675	0.378053	4.02122	5.27394	4.0395	0.167545	-2.57738	3.11159e-12	1.44039e-11	down	yes
EVM0024656	EVM0024656		EVM0024656.1	GO:0003677(DNA binding);GO:0003700(DNA binding transcription factor activity);GO:0005634(nucleus);GO:0006351(transcription, DNA-templated);GO:0006355(regulation of transcription, DNA-templated)				HB-BELL	PREDICTED: BEL1-like homeodomain protein 11 [Malus domestica]	mrna	0.354721	1.16141	0.851487	4.38791	3.94743	3.0491	0.20797	-2.26555	6.82328e-08	2.19562e-07	down	yes
EVM0018989	EVM0018989		EVM0018989.1	GO:0003700(DNA binding transcription factor activity);GO:0005634(nucleus);GO:0006351(transcription, DNA-templated);GO:0006355(regulation of transcription, DNA-templated);GO:0009637(response to blue light);GO:0030308(negative regulation of cell growth);GO:0043565(sequence-specific DNA binding);GO:0045893(positive regulation of transcription, DNA-templated);GO:0048510(regulation of timing of transi…				HB-HD-ZIP	PREDICTED: homeobox-leucine zipper protein HAT5-like [Pyrus x bretschneideri]	mrna	76.0316	67.4643	81.555	6.29818	5.51527	5.18832	13.2369	3.72649	2.1865e-212	7.7607e-210	up	yes
EVM0001639	EVM0001639		EVM0001639.1	GO:0003700(DNA binding transcription factor activity);GO:0005634(nucleus);GO:0006351(transcription, DNA-templated);GO:0006355(regulation of transcription, DNA-templated);GO:0009637(response to blue light);GO:0030308(negative regulation of cell growth);GO:0043565(sequence-specific DNA binding);GO:0045893(positive regulation of transcription, DNA-templated);GO:0048510(regulation of timing of transi…				HB-HD-ZIP	PREDICTED: homeobox-leucine zipper protein ATHB-6 isoform X2 [Pyrus x bretschneideri]	mrna	24.1921	28.2715	23.3702	134.841	124.512	128.454	0.195546	-2.35442	2.5193e-118	2.5936e-116	down	yes
EVM0009224	EVM0009224		EVM0009224.1	GO:0003677(DNA binding);GO:0003700(DNA binding transcription factor activity);GO:0005515(protein binding);GO:0005634(nucleus);GO:0006351(transcription, DNA-templated);GO:0006355(regulation of transcription, DNA-templated);GO:0008289(lipid binding);GO:0009845(seed germination);GO:0009913(epidermal cell differentiation);GO:0043565(sequence-specific DNA binding);GO:0048497(maintenance of floral orga…				HB-HD-ZIP	PREDICTED: homeobox-leucine zipper protein MERISTEM L1-like [Pyrus x bretschneideri]	mrna	1.10092	1.07057	1.06513	10.1984	10.3528	9.35883	0.108212	-3.20806	6.604e-99	4.68812e-97	down	yes
EVM0008694	EVM0008694		EVM0008694.1	GO:0003677(DNA binding);GO:0003700(DNA binding transcription factor activity);GO:0005515(protein binding);GO:0005634(nucleus);GO:0006351(transcription, DNA-templated);GO:0006355(regulation of transcription, DNA-templated);GO:0008289(lipid binding);GO:0009845(seed germination);GO:0009913(epidermal cell differentiation);GO:0043565(sequence-specific DNA binding);GO:0048497(maintenance of floral orga…				HB-HD-ZIP	PREDICTED: homeobox-leucine zipper protein GLABRA 2-like [Pyrus x bretschneideri]	mrna	12.9295	13.6739	12.7984	57.5636	51.126	43.2794	0.259275	-1.94744	1.42292e-54	3.71104e-53	down	yes
EVM0014871	EVM0014871		EVM0014871.1	GO:0003700(DNA binding transcription factor activity);GO:0005634(nucleus);GO:0006351(transcription, DNA-templated);GO:0006355(regulation of transcription, DNA-templated);GO:0009637(response to blue light);GO:0030308(negative regulation of cell growth);GO:0043565(sequence-specific DNA binding);GO:0045893(positive regulation of transcription, DNA-templated);GO:0048510(regulation of timing of transi…				HB-HD-ZIP	PREDICTED: homeobox-leucine zipper protein HAT5-like [Pyrus x bretschneideri]	mrna	52.6344	49.3417	50.6305	19.0416	15.6507	14.8331	3.08138	1.62358	2.10957e-49	4.74768e-48	up	yes
EVM0019277	EVM0019277		EVM0019277.1	GO:0003677(DNA binding);GO:0003700(DNA binding transcription factor activity);GO:0005515(protein binding);GO:0005634(nucleus);GO:0006351(transcription, DNA-templated);GO:0006355(regulation of transcription, DNA-templated);GO:0008283(cell proliferation);GO:0009585(red, far-red light phototransduction);GO:0009641(shade avoidance);GO:0009733(response to auxin);GO:0009735(response to cytokinin);GO:00…				HB-HD-ZIP	PREDICTED: homeobox-leucine zipper protein HAT4-like isoform X1 [Pyrus x bretschneideri]	mrna	117.174	86.3903	110.507	31.4587	35.0746	33.7133	3.13298	1.64754	5.67864e-46	1.16412e-44	up	yes
EVM0015540	EVM0015540		EVM0015540.1	GO:0003700(DNA binding transcription factor activity);GO:0005515(protein binding);GO:0005634(nucleus);GO:0006351(transcription, DNA-templated);GO:0006355(regulation of transcription, DNA-templated);GO:0009414(response to water deprivation);GO:0009737(response to abscisic acid);GO:0009738(abscisic acid-activated signaling pathway);GO:0043565(sequence-specific DNA binding);GO:0045893(positive regul…				HB-HD-ZIP	PREDICTED: homeobox-leucine zipper protein ATHB-7-like [Pyrus x bretschneideri]	mrna	5.46895	10.2837	5.77605	0.392679	0.343875	0.48024	17.693	4.14511	2.34955e-44	4.52067e-43	up	yes
EVM0037357	EVM0037357		EVM0037357.1	GO:0003700(DNA binding transcription factor activity);GO:0005515(protein binding);GO:0005634(nucleus);GO:0006351(transcription, DNA-templated);GO:0006355(regulation of transcription, DNA-templated);GO:0009414(response to water deprivation);GO:0009737(response to abscisic acid);GO:0009738(abscisic acid-activated signaling pathway);GO:0043565(sequence-specific DNA binding);GO:0045893(positive regul…				HB-HD-ZIP	PREDICTED: homeobox-leucine zipper protein ATHB-7-like [Pyrus x bretschneideri]	mrna	10.7453	19.2431	10.798	0.764554	0.636252	0.990212	17.0582	4.09239	8.33699e-41	1.43648e-39	up	yes
EVM0030335	EVM0030335		EVM0030335.1	GO:0000976(transcription regulatory region sequence-specific DNA binding);GO:0003677(DNA binding);GO:0003700(DNA binding transcription factor activity);GO:0005515(protein binding);GO:0005634(nucleus);GO:0006351(transcription, DNA-templated);GO:0006355(regulation of transcription, DNA-templated);GO:0008289(lipid binding);GO:0009828(plant-type cell wall loosening);GO:0010091(trichome branching)				HB-HD-ZIP	hypothetical protein DVH24_023436 [Malus domestica]	mrna	1.52293	0.83062	0.916715	10.0922	8.80117	9.27242	0.116108	-3.10646	1.29403e-40	2.2153e-39	down	yes
EVM0023402	EVM0023402		EVM0023402.1	GO:0003700(DNA binding transcription factor activity);GO:0005515(protein binding);GO:0005634(nucleus);GO:0006351(transcription, DNA-templated);GO:0006355(regulation of transcription, DNA-templated);GO:0009414(response to water deprivation);GO:0009735(response to cytokinin);GO:0009737(response to abscisic acid);GO:0009738(abscisic acid-activated signaling pathway);GO:0043565(sequence-specific DNA …				HB-HD-ZIP	PREDICTED: homeobox-leucine zipper protein HAT22-like [Pyrus x bretschneideri]	mrna	16.5805	13.2111	13.7483	3.62022	2.60327	4.02372	4.24895	2.08711	9.52274e-28	1.02189e-26	up	yes
EVM0030998	EVM0030998		EVM0030998.1	GO:0003677(DNA binding);GO:0003700(DNA binding transcription factor activity);GO:0005634(nucleus);GO:0006351(transcription, DNA-templated);GO:0006355(regulation of transcription, DNA-templated);GO:0009744(response to sucrose);GO:0009965(leaf morphogenesis);GO:0043565(sequence-specific DNA binding);GO:0048826(cotyledon morphogenesis);GO:0080022(primary root development)				HB-HD-ZIP	PREDICTED: homeobox-leucine zipper protein ATHB-13 [Pyrus x bretschneideri]	mrna	40.937	37.0068	35.17	79.0094	78.1501	72.0892	0.493411	-1.01914	1.04056e-22	8.87832e-22	down	yes
EVM0015470	EVM0015470		EVM0015470.2	GO:0003677(DNA binding);GO:0003700(DNA binding transcription factor activity);GO:0005515(protein binding);GO:0005634(nucleus);GO:0006351(transcription, DNA-templated);GO:0006355(regulation of transcription, DNA-templated);GO:0008289(lipid binding);GO:0009845(seed germination);GO:0009913(epidermal cell differentiation);GO:0043565(sequence-specific DNA binding);GO:0048497(maintenance of floral orga…				HB-HD-ZIP	PREDICTED: homeobox-leucine zipper protein ROC3 isoform X1 [Pyrus x bretschneideri]	mrna	9.83292	10.317	9.67564	20.659	21.5014	18.5348	0.491399	-1.02503	5.07578e-21	4.00104e-20	down	yes
EVM0030519	EVM0030519		EVM0030519.1	GO:0003677(DNA binding);GO:0003700(DNA binding transcription factor activity);GO:0005515(protein binding);GO:0005634(nucleus);GO:0006351(transcription, DNA-templated);GO:0006355(regulation of transcription, DNA-templated);GO:0008283(cell proliferation);GO:0009585(red, far-red light phototransduction);GO:0009641(shade avoidance);GO:0009733(response to auxin);GO:0009735(response to cytokinin);GO:00…				HB-HD-ZIP	PREDICTED: homeobox-leucine zipper protein HAT4-like isoform X1 [Pyrus x bretschneideri]	mrna	55.6614	41.4111	59.9849	21.1718	22.6797	23.9861	2.3152	1.21114	1.66889e-19	1.21861e-18	up	yes
EVM0001259	EVM0001259		EVM0001259.1	GO:0000976(transcription regulatory region sequence-specific DNA binding);GO:0003677(DNA binding);GO:0003700(DNA binding transcription factor activity);GO:0005515(protein binding);GO:0005634(nucleus);GO:0006351(transcription, DNA-templated);GO:0006355(regulation of transcription, DNA-templated);GO:0008289(lipid binding);GO:0009828(plant-type cell wall loosening);GO:0010091(trichome branching)				HB-HD-ZIP	PREDICTED: homeobox-leucine zipper protein HDG11 isoform X1 [Pyrus x bretschneideri]	mrna	0.891127	0.526576	0.387272	3.60742	3.32294	4.31709	0.160479	-2.63955	1.72642e-16	1.05739e-15	down	yes
EVM0020106	EVM0020106		EVM0020106.1	GO:0003677(DNA binding);GO:0003700(DNA binding transcription factor activity);GO:0005634(nucleus);GO:0006351(transcription, DNA-templated);GO:0006355(regulation of transcription, DNA-templated);GO:0008289(lipid binding);GO:0009855(determination of bilateral symmetry);GO:0009944(polarity specification of adaxial/abaxial axis);GO:0009955(adaxial/abaxial pattern specification);GO:0010014(meristem in…				HB-HD-ZIP	PREDICTED: homeobox-leucine zipper protein HOX32-like [Pyrus x bretschneideri]	mrna	7.13867	6.61823	7.35221	18.0652	17.48	13.1109	0.433842	-1.20476	1.10771e-14	6.06752e-14	down	yes
EVM0030650	EVM0030650		EVM0030650.1	GO:0003700(DNA binding transcription factor activity);GO:0005515(protein binding);GO:0005634(nucleus);GO:0006351(transcription, DNA-templated);GO:0006355(regulation of transcription, DNA-templated);GO:0009414(response to water deprivation);GO:0009737(response to abscisic acid);GO:0009738(abscisic acid-activated signaling pathway);GO:0043565(sequence-specific DNA binding);GO:0045893(positive regul…				HB-HD-ZIP	PREDICTED: homeobox-leucine zipper protein ATHB-12-like [Pyrus x bretschneideri]	mrna	1.6481	5.81905	1.63258	0.17417	0	0.052644	40.1198	5.32624	3.51081e-11	1.50344e-10	up	yes
EVM0038200	EVM0038200		EVM0038200.1	GO:0000976(transcription regulatory region sequence-specific DNA binding);GO:0003677(DNA binding);GO:0003700(DNA binding transcription factor activity);GO:0005515(protein binding);GO:0005634(nucleus);GO:0006351(transcription, DNA-templated);GO:0006355(regulation of transcription, DNA-templated);GO:0008289(lipid binding);GO:0009828(plant-type cell wall loosening);GO:0010091(trichome branching)				HB-HD-ZIP	PREDICTED: homeobox-leucine zipper protein HDG11-like [Pyrus x bretschneideri]	mrna	0.296036	0.448403	0.250251	0	0	0	3315.63	11.6951	8.24685e-09	2.88404e-08	up	yes
EVM0032714	EVM0032714		EVM0032714.1	GO:0003677(DNA binding);GO:0003700(DNA binding transcription factor activity);GO:0005634(nucleus);GO:0006351(transcription, DNA-templated);GO:0006355(regulation of transcription, DNA-templated);GO:0043565(sequence-specific DNA binding)				HB-HD-ZIP	PREDICTED: homeobox-leucine zipper protein HOX11-like [Pyrus x bretschneideri]	mrna	1.85538	1.61906	1.29817	0.510586	0.247744	0.356864	4.27961	2.09748	1.3543e-07	4.24575e-07	up	yes
EVM0031376	EVM0031376		EVM0031376.1	GO:0003677(DNA binding);GO:0003700(DNA binding transcription factor activity);GO:0005515(protein binding);GO:0005634(nucleus);GO:0006351(transcription, DNA-templated);GO:0006355(regulation of transcription, DNA-templated);GO:0008289(lipid binding);GO:0010090(trichome morphogenesis);GO:0043565(sequence-specific DNA binding);GO:0048497(maintenance of floral organ identity)				HB-HD-ZIP	PREDICTED: homeobox-leucine zipper protein HDG2-like [Pyrus x bretschneideri]	mrna	7.99527	14.125	9.85519	23.4931	25.074	20.9535	0.459942	-1.12048	1.55014e-07	4.83895e-07	down	yes
EVM0011680	EVM0011680		EVM0011680.1	GO:0003677(DNA binding);GO:0003700(DNA binding transcription factor activity);GO:0005634(nucleus);GO:0006351(transcription, DNA-templated);GO:0006355(regulation of transcription, DNA-templated);GO:0043565(sequence-specific DNA binding)				HB-HD-ZIP	hypothetical protein DVH24_019445 [Malus domestica]	mrna	8.11097	11.2352	9.51384	22.3867	20.2027	16.7843	0.486074	-1.04075	1.96302e-07	6.07136e-07	down	yes
EVM0013290	EVM0013290		EVM0013290.1	GO:0003677(DNA binding);GO:0003700(DNA binding transcription factor activity);GO:0005634(nucleus);GO:0006351(transcription, DNA-templated);GO:0006355(regulation of transcription, DNA-templated);GO:0043565(sequence-specific DNA binding)				HB-HD-ZIP	PREDICTED: homeobox-leucine zipper protein HOX11-like [Pyrus x bretschneideri]	mrna	0.995473	1.19723	1.40214	0.381398	0.249017	0.267478	4.00365	2.00131	2.30852e-07	7.0905e-07	up	yes
EVM0015074	EVM0015074		EVM0015074.1	GO:0003677(DNA binding);GO:0003700(DNA binding transcription factor activity);GO:0005634(nucleus);GO:0006351(transcription, DNA-templated);GO:0006355(regulation of transcription, DNA-templated);GO:0043565(sequence-specific DNA binding)				HB-HD-ZIP	PREDICTED: homeobox-leucine zipper protein HAT7 [Pyrus x bretschneideri]	mrna	15.1301	7.27891	8.24035	23.804	24.3969	27.3311	0.40578	-1.30123	1.51296e-06	4.30333e-06	down	yes
EVM0036152	EVM0036152		EVM0036152.1	GO:0003677(DNA binding);GO:0003700(DNA binding transcription factor activity);GO:0005634(nucleus);GO:0006351(transcription, DNA-templated);GO:0006355(regulation of transcription, DNA-templated);GO:0009965(leaf morphogenesis);GO:0010434(bract formation);GO:0010582(floral meristem determinacy);GO:0043565(sequence-specific DNA binding);GO:0045893(positive regulation of transcription, DNA-templated);…				HB-HD-ZIP	hypothetical protein DVH24_019826 [Malus domestica]	mrna	0.618194	0.226363	0.449049	2.29257	1.99411	2.63254	0.186958	-2.41921	3.75892e-06	1.02653e-05	down	yes
EVM0030225	EVM0030225		EVM0030225.1	GO:0000976(transcription regulatory region sequence-specific DNA binding);GO:0003677(DNA binding);GO:0003700(DNA binding transcription factor activity);GO:0005515(protein binding);GO:0005634(nucleus);GO:0006351(transcription, DNA-templated);GO:0006355(regulation of transcription, DNA-templated);GO:0008289(lipid binding);GO:0009828(plant-type cell wall loosening);GO:0010091(trichome branching)				HB-HD-ZIP	PREDICTED: homeobox-leucine zipper protein HDG11-like [Pyrus x bretschneideri]	mrna	0.058189	0	0.041687	0.358449	0.372174	0.318449	0.0952041	-3.39283	0.000139954	0.000319643	down	yes
EVM0015852	EVM0015852		EVM0015852.1	GO:0000976(transcription regulatory region sequence-specific DNA binding);GO:0003677(DNA binding);GO:0003700(DNA binding transcription factor activity);GO:0005515(protein binding);GO:0005634(nucleus);GO:0006351(transcription, DNA-templated);GO:0006355(regulation of transcription, DNA-templated);GO:0008289(lipid binding);GO:0009828(plant-type cell wall loosening);GO:0010091(trichome branching)				HB-HD-ZIP	PREDICTED: homeobox-leucine zipper protein ROC8-like [Pyrus x bretschneideri]	mrna	0	0	0	0.048817	0.072493	0.153723	0.00109078	-9.84043	0.00144774	0.00289183	down	yes
EVM0015934	EVM0015934		EVM0015934.1	GO:0003700(DNA binding transcription factor activity);GO:0005515(protein binding);GO:0005634(nucleus);GO:0006351(transcription, DNA-templated);GO:0006355(regulation of transcription, DNA-templated);GO:0009414(response to water deprivation);GO:0009737(response to abscisic acid);GO:0009738(abscisic acid-activated signaling pathway);GO:0043565(sequence-specific DNA binding);GO:0045893(positive regul…				HB-HD-ZIP	PREDICTED: homeobox-leucine zipper protein ATHB-12-like [Pyrus x bretschneideri]	mrna	0.967041	2.86851	1.333	0	0	0.118726	43.5335	5.44405	0.00283528	0.00542973	up	yes
EVM0027391	EVM0027391		EVM0027391.1	GO:0003700(DNA binding transcription factor activity);GO:0005515(protein binding);GO:0005634(nucleus);GO:0006355(regulation of transcription, DNA-templated);GO:0009723(response to ethylene);GO:0009736(cytokinin-activated signaling pathway);GO:0010094(specification of carpel identity);GO:0043565(sequence-specific DNA binding)				HB-KNOX	PREDICTED: homeobox protein knotted-1-like 6 isoform X1 [Malus domestica]	mrna	26.0944	17.2902	21.2579	4.80141	4.18004	5.32931	4.51706	2.17539	2.79055e-40	4.72303e-39	up	yes
EVM0001290	EVM0001290		EVM0001290.1	GO:0003677(DNA binding);GO:0003700(DNA binding transcription factor activity);GO:0005634(nucleus);GO:0005737(cytoplasm);GO:0005829(cytosol);GO:0006355(regulation of transcription, DNA-templated);GO:0009416(response to light stimulus)				HB-KNOX	PREDICTED: homeobox protein knotted-1-like 13 isoform X1 [Pyrus x bretschneideri]	mrna	51.3131	54.3674	53.895	22.3057	25.5864	19.778	2.35814	1.23765	8.55168e-34	1.16531e-32	up	yes
EVM0037070	EVM0037070		EVM0037070.1	GO:0003677(DNA binding);GO:0003700(DNA binding transcription factor activity);GO:0005515(protein binding);GO:0005634(nucleus);GO:0005829(cytosol);GO:0006355(regulation of transcription, DNA-templated);GO:0009416(response to light stimulus);GO:0009722(detection of cytokinin stimulus);GO:0071345(cellular response to cytokine stimulus)				HB-KNOX	PREDICTED: homeobox protein knotted-1-like 3 isoform X1 [Pyrus x bretschneideri]	mrna	67.6735	99.1084	93.8696	24.5177	30.6127	27.7902	3.14339	1.65232	1.33874e-32	1.74942e-31	up	yes
EVM0034909	EVM0034909		EVM0034909.1	GO:0003700(DNA binding transcription factor activity);GO:0003723(RNA binding);GO:0005515(protein binding);GO:0005634(nucleus);GO:0005737(cytoplasm);GO:0006355(regulation of transcription, DNA-templated);GO:0009691(cytokinin biosynthetic process);GO:0009934(regulation of meristem structural organization);GO:0015630(microtubule cytoskeleton);GO:0019827(stem cell population maintenance);GO:0042803(p…				HB-KNOX	PREDICTED: homeobox protein knotted-1-like LET6 [Pyrus x bretschneideri]	mrna	25.3184	10.2334	12.8816	3.9142	2.81766	3.22766	4.86303	2.28185	5.09485e-16	3.03711e-15	up	yes
EVM0036753	EVM0036753		EVM0036753.1	GO:0003700(DNA binding transcription factor activity);GO:0003723(RNA binding);GO:0005515(protein binding);GO:0005634(nucleus);GO:0005737(cytoplasm);GO:0006355(regulation of transcription, DNA-templated);GO:0009691(cytokinin biosynthetic process);GO:0009934(regulation of meristem structural organization);GO:0015630(microtubule cytoskeleton);GO:0019827(stem cell population maintenance);GO:0042803(p…				HB-KNOX	PREDICTED: homeobox protein SHOOT MERISTEMLESS-like [Pyrus x bretschneideri]	mrna	26.2678	15.3469	14.0914	6.55427	5.44343	6.79849	2.9637	1.5674	6.69928e-14	3.48174e-13	up	yes
EVM0024421	EVM0024421		EVM0024421.1	GO:0003700(DNA binding transcription factor activity);GO:0005515(protein binding);GO:0005634(nucleus);GO:0006355(regulation of transcription, DNA-templated);GO:0009723(response to ethylene);GO:0009736(cytokinin-activated signaling pathway);GO:0010094(specification of carpel identity);GO:0043565(sequence-specific DNA binding)				HB-KNOX	PREDICTED: homeobox protein knotted-1-like 1 [Malus domestica]	mrna	1.43041	1.0746	1.17658	0	0	0	12272	13.5831	1.18052e-11	5.24209e-11	up	yes
EVM0032693	EVM0032693		EVM0032693.1	GO:0003700(DNA binding transcription factor activity);GO:0005515(protein binding);GO:0005634(nucleus);GO:0006355(regulation of transcription, DNA-templated);GO:0009723(response to ethylene);GO:0009736(cytokinin-activated signaling pathway);GO:0010094(specification of carpel identity);GO:0043565(sequence-specific DNA binding)				HB-KNOX	PREDICTED: homeobox protein knotted-1-like 1 isoform X1 [Malus domestica]	mrna	1.2278	0.737464	0.873045	0.123896	0	0	22.9088	4.51783	0.0106874	0.0185522	up	yes
EVM0008868	EVM0008868		EVM0008868.1	GO:0003677(DNA binding);GO:0003682(chromatin binding);GO:0005634(nucleus)				HB-other	PREDICTED: protein SAWADEE HOMEODOMAIN HOMOLOG 2-like isoform X1 [Pyrus x bretschneideri]	mrna	20.2086	23.9166	20.9008	7.77328	8.0294	8.40738	2.68591	1.42541	2.58502e-41	4.54224e-40	up	yes
EVM0009858	EVM0009858		EVM0009858.1					HB-other	PREDICTED: homeobox-leucine zipper protein ATHB-12-like [Pyrus x bretschneideri]	mrna	2.10094	4.08225	2.86677	0	0	0	30166.5	14.8807	1.55298e-13	7.87029e-13	up	yes
EVM0016025	EVM0016025		EVM0016025.1	GO:0002229(defense response to oomycetes);GO:0003677(DNA binding);GO:0003700(DNA binding transcription factor activity);GO:0004601(peroxidase activity);GO:0005634(nucleus);GO:0006952(defense response);GO:0009414(response to water deprivation);GO:0009507(chloroplast);GO:0009620(response to fungus);GO:0009682(induced systemic resistance);GO:0009737(response to abscisic acid);GO:0009738(abscisic aci…				HB-other	PREDICTED: protein OVEREXPRESSOR OF CATIONIC PEROXIDASE 3-like [Pyrus x bretschneideri]	mrna	4.31746	5.19384	4.83203	11.5527	12.9804	10.8283	0.405621	-1.3018	7.03655e-13	3.40489e-12	down	yes
EVM0020592	EVM0020592		EVM0020592.1	GO:0003677(DNA binding);GO:0003700(DNA binding transcription factor activity);GO:0005634(nucleus);GO:0006351(transcription, DNA-templated);GO:0006355(regulation of transcription, DNA-templated);GO:0009733(response to auxin);GO:0043565(sequence-specific DNA binding)				HB-other	PREDICTED: homeobox-leucine zipper protein ATHB-40-like [Malus domestica]	mrna	1.4097	3.20942	1.97099	0.13863	0.289214	0.255357	9.64593	3.26992	8.78793e-11	3.63787e-10	up	yes
EVM0007324	EVM0007324		EVM0007324.1	GO:0000976(transcription regulatory region sequence-specific DNA binding);GO:0003677(DNA binding);GO:0003700(DNA binding transcription factor activity);GO:0005515(protein binding);GO:0005634(nucleus);GO:0006351(transcription, DNA-templated);GO:0006355(regulation of transcription, DNA-templated);GO:0008289(lipid binding);GO:0009828(plant-type cell wall loosening);GO:0010091(trichome branching)				HB-other	homeobox-leucine zipper protein GLABRA 2-like [Malus domestica]	mrna	4.5285	4.06803	6.06312	12.5628	12.9094	9.23246	0.422413	-1.24328	1.59405e-05	4.06687e-05	down	yes
EVM0040938	EVM0040938		EVM0040938.1	GO:0003700(DNA binding transcription factor activity);GO:0005634(nucleus);GO:0006351(transcription, DNA-templated);GO:0006355(regulation of transcription, DNA-templated);GO:0009637(response to blue light);GO:0009646(response to absence of light);GO:0043565(sequence-specific DNA binding)				HB-other	PREDICTED: homeobox-leucine zipper protein ATHB-52-like [Pyrus x bretschneideri]	mrna	0	0	0	0.480973	0.399684	0.342345	0.000245298	-11.9932	0.000712712	0.00148416	down	yes
EVM0022425	EVM0022425		EVM0022425.1	GO:0003700(DNA binding transcription factor activity);GO:0005515(protein binding);GO:0005634(nucleus);GO:0006351(transcription, DNA-templated);GO:0006355(regulation of transcription, DNA-templated);GO:0006952(defense response);GO:0009733(response to auxin);GO:0035064(methylated histone binding);GO:0035098(ESC/E(Z) complex);GO:0043565(sequence-specific DNA binding);GO:0045893(positive regulation o…				HB-PHD	PREDICTED: pathogenesis-related homeodomain protein-like [Pyrus x bretschneideri]	mrna	1.57991	1.3397	1.25155	3.31148	2.86946	2.92232	0.458204	-1.12594	2.51126e-07	7.68471e-07	down	yes
EVM0018662	EVM0018662		EVM0018662.1	GO:0003677(DNA binding);GO:0003700(DNA binding transcription factor activity);GO:0005634(nucleus);GO:0006351(transcription, DNA-templated);GO:0006355(regulation of transcription, DNA-templated);GO:0007275(multicellular organism development)				HB-WOX	PREDICTED: WUSCHEL-related homeobox 8-like [Pyrus x bretschneideri]	mrna	14.4404	14.5834	14.0213	5.68978	6.46383	7.47349	2.19315	1.133	9.74986e-21	7.57174e-20	up	yes
EVM0015552	EVM0015552		EVM0015552.1	GO:0003677(DNA binding);GO:0003700(DNA binding transcription factor activity);GO:0005634(nucleus);GO:0005829(cytosol);GO:0006351(transcription, DNA-templated);GO:0006355(regulation of transcription, DNA-templated);GO:0099402(plant organ development)	03013(RNA transport)	K14292	EC:2.1.1.-	HB-WOX	PREDICTED: WUSCHEL-related homeobox 1 [Pyrus x bretschneideri]	mrna	0.213732	0.85481	0.215446	4.58686	5.97684	3.30512	0.0925809	-3.43314	2.13735e-11	9.31007e-11	down	yes
EVM0031321	EVM0031321		EVM0031321.1	GO:0003677(DNA binding);GO:0003700(DNA binding transcription factor activity);GO:0005515(protein binding);GO:0005634(nucleus);GO:0006351(transcription, DNA-templated);GO:0006355(regulation of transcription, DNA-templated);GO:0008283(cell proliferation);GO:0009908(flower development);GO:0009943(adaxial/abaxial axis specification);GO:0009947(centrolateral axis specification);GO:0010865(stipule deve…	03013(RNA transport)	K14292	EC:2.1.1.-	HB-WOX	PREDICTED: WUSCHEL-related homeobox 3-like [Pyrus x bretschneideri]	mrna	5.18179	3.89453	2.52283	0.43802	1.02314	0.309887	6.54931	2.71134	4.03814e-09	1.44862e-08	up	yes
EVM0033779	EVM0033779		EVM0033779.1	GO:0003677(DNA binding);GO:0003700(DNA binding transcription factor activity);GO:0005515(protein binding);GO:0005634(nucleus);GO:0006351(transcription, DNA-templated);GO:0006355(regulation of transcription, DNA-templated);GO:0007165(signal transduction);GO:0010067(procambium histogenesis);GO:0010087(phloem or xylem histogenesis);GO:0051301(cell division)	03013(RNA transport)	K14292	EC:2.1.1.-	HB-WOX	PREDICTED: WUSCHEL-related homeobox 4 [Pyrus x bretschneideri]	mrna	3.73339	2.2099	2.57705	10.1583	9.48962	8.02769	0.307864	-1.69963	1.914e-08	6.48775e-08	down	yes
EVM0035378	EVM0035378		EVM0035378.3	GO:0003700(DNA binding transcription factor activity);GO:0005634(nucleus);GO:0005737(cytoplasm);GO:0006351(transcription, DNA-templated);GO:0006355(regulation of transcription, DNA-templated);GO:0008284(positive regulation of cell proliferation);GO:0009735(response to cytokinin);GO:0009793(embryo development ending in seed dormancy);GO:0010075(regulation of meristem growth);GO:0043565(sequence-sp…				HB-WOX	hypothetical protein DVH24_011462 [Malus domestica]	mrna	0.552188	0.457697	0.349601	1.05993	3.19039	1.48791	0.236917	-2.07754	1.34857e-05	3.47315e-05	down	yes
EVM0010814	EVM0010814		EVM0010814.1	GO:0003677(DNA binding);GO:0003700(DNA binding transcription factor activity);GO:0005515(protein binding);GO:0005634(nucleus);GO:0006351(transcription, DNA-templated);GO:0006355(regulation of transcription, DNA-templated);GO:0007165(signal transduction);GO:0010067(procambium histogenesis);GO:0010087(phloem or xylem histogenesis);GO:0051301(cell division)	03013(RNA transport)	K14292	EC:2.1.1.-	HB-WOX	hypothetical protein DVH24_020690 [Malus domestica]	mrna	3.88832	2.41557	2.01792	5.25881	5.79445	7.25648	0.454502	-1.13764	0.00146414	0.00292224	down	yes
EVM0022738	EVM0022738		EVM0022738.1	GO:0003677(DNA binding);GO:0003700(DNA binding transcription factor activity);GO:0005634(nucleus);GO:0006338(chromatin remodeling)				HMG	PREDICTED: high mobility group B protein 6-like [Pyrus x bretschneideri]	mrna	60.5795	43.708	55.0695	273.858	300.889	215.992	0.201529	-2.31094	1.14827e-51	2.75917e-50	down	yes
EVM0007958	EVM0007958		EVM0007958.1	GO:0000741(karyogamy);GO:0003677(DNA binding);GO:0003700(DNA binding transcription factor activity);GO:0005634(nucleus);GO:0010197(polar nucleus fusion)				HMG	PREDICTED: high mobility group B protein 7-like [Malus domestica]	mrna	17.186	14.7347	16.5413	36.8588	36.0423	37.4781	0.43905	-1.18754	2.36048e-23	2.07679e-22	down	yes
EVM0030265	EVM0030265		EVM0030265.1	GO:0000302(response to reactive oxygen species);GO:0003677(DNA binding);GO:0003700(DNA binding transcription factor activity);GO:0005515(protein binding);GO:0005634(nucleus);GO:0005737(cytoplasm);GO:0006351(transcription, DNA-templated);GO:0006355(regulation of transcription, DNA-templated);GO:0010200(response to chitin);GO:0042803(protein homodimerization activity);GO:0043565(sequence-specific D…				HSF	PREDICTED: heat stress transcription factor A-4c-like [Pyrus x bretschneideri]	mrna	17.0603	16.3566	15.2321	4.85746	4.99775	5.01883	3.27073	1.70961	9.30324e-77	4.25949e-75	up	yes
EVM0032994	EVM0032994		EVM0032994.1	GO:0005634(nucleus)				HSF	PREDICTED: heat shock factor protein HSF24 [Pyrus x bretschneideri]	mrna	7.76643	9.07279	8.13403	1.26539	1.36964	1.00652	6.85787	2.77776	1.38248e-56	3.81939e-55	up	yes
EVM0004327	EVM0004327		EVM0004327.1	GO:0005634(nucleus)				HSF	PREDICTED: heat stress transcription factor B-2b [Pyrus x bretschneideri]	mrna	44.4409	43.8414	46.083	16.2259	19.8823	17.471	2.50778	1.32641	1.17681e-40	2.01834e-39	up	yes
EVM0026801	EVM0026801		EVM0026801.1	GO:0003677(DNA binding);GO:0003700(DNA binding transcription factor activity);GO:0005634(nucleus);GO:0005737(cytoplasm);GO:0006351(transcription, DNA-templated);GO:0006355(regulation of transcription, DNA-templated);GO:0043565(sequence-specific DNA binding)				HSF	PREDICTED: heat stress transcription factor A-8 [Pyrus x bretschneideri]	mrna	22.7479	20.7823	20.0103	8.31859	8.64034	8.33013	2.51257	1.32916	9.10551e-40	1.5116e-38	up	yes
EVM0006804	EVM0006804		EVM0006804.1	GO:0003677(DNA binding);GO:0003700(DNA binding transcription factor activity);GO:0005634(nucleus);GO:0005737(cytoplasm);GO:0006351(transcription, DNA-templated);GO:0006355(regulation of transcription, DNA-templated);GO:0008356(asymmetric cell division);GO:0034605(cellular response to heat);GO:0043565(sequence-specific DNA binding)				HSF	PREDICTED: heat stress transcription factor B-4-like [Malus domestica]	mrna	1.36793	0.974383	1.38183	10.9447	12.0005	8.66171	0.117827	-3.08526	3.23452e-39	5.28485e-38	down	yes
EVM0015933	EVM0015933		EVM0015933.1	GO:0005634(nucleus)				HSF	PREDICTED: heat stress transcription factor B-2a [Pyrus x bretschneideri]	mrna	17.173	16.9869	23.3923	3.34848	4.87525	4.72508	4.4446	2.15205	1.01283e-32	1.3296e-31	up	yes
EVM0030677	EVM0030677		EVM0030677.1	GO:0003677(DNA binding);GO:0003700(DNA binding transcription factor activity);GO:0005515(protein binding);GO:0005634(nucleus);GO:0006351(transcription, DNA-templated);GO:0006355(regulation of transcription, DNA-templated);GO:0009408(response to heat);GO:0010200(response to chitin);GO:0043565(sequence-specific DNA binding)				HSF	PREDICTED: heat stress transcription factor A-3-like [Pyrus x bretschneideri]	mrna	2.88056	2.64853	3.86655	0.082363	0.202996	0.218895	18.6328	4.21977	2.11193e-31	2.62453e-30	up	yes
EVM0030300	EVM0030300		EVM0030300.1	GO:0000302(response to reactive oxygen species);GO:0003677(DNA binding);GO:0003700(DNA binding transcription factor activity);GO:0005515(protein binding);GO:0005634(nucleus);GO:0005737(cytoplasm);GO:0006351(transcription, DNA-templated);GO:0006355(regulation of transcription, DNA-templated);GO:0010200(response to chitin);GO:0042803(protein homodimerization activity);GO:0043565(sequence-specific D…				HSF	PREDICTED: heat stress transcription factor A-4c-like [Pyrus x bretschneideri]	mrna	18.5429	19.495	18.4211	5.60126	6.87865	4.32545	3.35958	1.74828	2.05479e-29	2.35486e-28	up	yes
EVM0008452	EVM0008452		EVM0008452.1	GO:0003677(DNA binding);GO:0003700(DNA binding transcription factor activity);GO:0005634(nucleus);GO:0005737(cytoplasm);GO:0006351(transcription, DNA-templated);GO:0006355(regulation of transcription, DNA-templated);GO:0008356(asymmetric cell division);GO:0034605(cellular response to heat);GO:0043565(sequence-specific DNA binding)				HSF	PREDICTED: heat stress transcription factor B-4 [Pyrus x bretschneideri]	mrna	13.3159	12.3416	10.8022	41.0745	38.4055	30.504	0.3315	-1.59292	2.14961e-24	1.99437e-23	down	yes
EVM0009637	EVM0009637		EVM0009637.1	GO:0005634(nucleus)				HSF	PREDICTED: heat stress transcription factor B-1-like [Pyrus x bretschneideri]	mrna	9.04477	12.181	7.86734	1.73824	0.949609	2.01754	6.18293	2.62829	1.86144e-20	1.42539e-19	up	yes
EVM0038969	EVM0038969		EVM0038969.1	GO:0003677(DNA binding);GO:0003700(DNA binding transcription factor activity);GO:0005515(protein binding);GO:0005634(nucleus);GO:0006351(transcription, DNA-templated);GO:0006355(regulation of transcription, DNA-templated);GO:0009408(response to heat);GO:0010200(response to chitin);GO:0043565(sequence-specific DNA binding)				HSF	PREDICTED: heat stress transcription factor A-3-like isoform X1 [Pyrus x bretschneideri]	mrna	2.86399	3.83854	3.51741	1.20601	0.915168	0.977317	3.29835	1.72175	5.12168e-17	3.238e-16	up	yes
EVM0041259	EVM0041259		EVM0041259.1	GO:0003677(DNA binding);GO:0003700(DNA binding transcription factor activity);GO:0005515(protein binding);GO:0005634(nucleus);GO:0005737(cytoplasm);GO:0006351(transcription, DNA-templated);GO:0006355(regulation of transcription, DNA-templated);GO:0034605(cellular response to heat);GO:0043565(sequence-specific DNA binding);GO:0046686(response to cadmium ion)				HSF	PREDICTED: heat stress transcription factor B-3 [Pyrus x bretschneideri]	mrna	10.0329	12.295	10.7055	4.31642	4.30861	4.36826	2.54234	1.34616	2.5744e-16	1.55578e-15	up	yes
EVM0027654	EVM0027654		EVM0027654.1	GO:0005634(nucleus)				HSF	PREDICTED: LOW QUALITY PROTEIN: heat stress transcription factor B-1 [Malus domestica]	mrna	1.06877	0.645834	1.0834	0.077896	0.042738	0	23.1942	4.53569	7.95303e-08	2.54204e-07	up	yes
EVM0040753	EVM0040753		EVM0040753.1	GO:0001666(response to hypoxia);GO:0003677(DNA binding);GO:0003700(DNA binding transcription factor activity);GO:0005515(protein binding);GO:0005634(nucleus);GO:0005737(cytoplasm);GO:0006351(transcription, DNA-templated);GO:0006355(regulation of transcription, DNA-templated);GO:0009408(response to heat);GO:0009507(chloroplast);GO:0009644(response to high light intensity);GO:0010200(response to ch…				HSF	PREDICTED: heat stress transcription factor A-2-like [Pyrus x bretschneideri]	mrna	0.734813	0.504623	0.640793	0.128065	0	0.088579	8.67889	3.11751	8.91948e-05	0.000208807	up	yes
EVM0024738	EVM0024738		EVM0024738.1	GO:0003677(DNA binding);GO:0003700(DNA binding transcription factor activity);GO:0005515(protein binding);GO:0005634(nucleus);GO:0005737(cytoplasm);GO:0006351(transcription, DNA-templated);GO:0006355(regulation of transcription, DNA-templated);GO:0034605(cellular response to heat);GO:0043565(sequence-specific DNA binding);GO:0046686(response to cadmium ion)				HSF	PREDICTED: heat stress transcription factor B-3-like [Pyrus x bretschneideri]	mrna	0.254263	1.35576	0.926578	0.145147	0.077615	0	11.387	3.50932	0.000344439	0.000749119	up	yes
EVM0013908	EVM0013908		EVM0013908.1	GO:0006368(transcription elongation from RNA polymerase II promoter);GO:0070449(elongin complex)				IWS1	PREDICTED: probable mediator of RNA polymerase II transcription subunit 26b [Pyrus x bretschneideri]	mrna	70.2064	63.1153	64.0029	12.166	15.7489	15.3399	4.56192	2.18964	1.60402e-86	8.92243e-85	up	yes
EVM0009554	EVM0009554		EVM0009554.1	GO:0005634(nucleus);GO:0009742(brassinosteroid mediated signaling pathway);GO:0010793(regulation of mRNA export from nucleus);GO:0032784(regulation of DNA-templated transcription, elongation);GO:0050684(regulation of mRNA processing);GO:2001253(regulation of histone H3-K36 trimethylation)				IWS1	PREDICTED: transcription factor IWS1 [Malus domestica]	mrna	25.5588	22.4178	23.9512	0	0	0	239759	17.8712	4.47416e-30	5.29525e-29	up	yes
EVM0028663	EVM0028663		EVM0028663.3	GO:0000976(transcription regulatory region sequence-specific DNA binding);GO:0003700(DNA binding transcription factor activity);GO:0005634(nucleus);GO:0032454(histone demethylase activity (H3-K9 specific));GO:0033169(histone H3-K9 demethylation);GO:0042742(defense response to bacterium);GO:2000028(regulation of photoperiodism, flowering)				Jumonji	PREDICTED: lysine-specific demethylase JMJ25 isoform X1 [Pyrus x bretschneideri]	mrna	9.73254	8.95404	9.31043	2.41094	2.04447	2.73524	3.89353	1.96108	1.77692e-58	5.19812e-57	up	yes
EVM0007743	EVM0007743		EVM0007743.1	GO:0005634(nucleus);GO:0005829(cytosol);GO:0007166(cell surface receptor signaling pathway);GO:0016757(transferase activity, transferring glycosyl groups)				Jumonji	hypothetical protein DVH24_042564 [Malus domestica]	mrna	48.1367	46.3844	41.0354	10.0475	13.438	13.6969	3.64571	1.8662	4.13625e-54	1.06313e-52	up	yes
EVM0012608	EVM0012608		EVM0012608.2	GO:0000785(chromatin);GO:0003700(DNA binding transcription factor activity);GO:0005634(nucleus)				Jumonji	PREDICTED: lysine-specific demethylase JMJ25-like isoform X1 [Pyrus x bretschneideri]	mrna	8.8957	9.34054	9.74616	2.7027	3.22282	3.06383	3.11284	1.63823	4.78639e-49	1.06817e-47	up	yes
EVM0003589	EVM0003589		EVM0003589.1	GO:0000792(heterochromatin);GO:0032454(histone demethylase activity (H3-K9 specific));GO:0045815(positive regulation of gene expression, epigenetic);GO:0048439(flower morphogenesis)				Jumonji	PREDICTED: lysine-specific demethylase JMJ706-like isoform X2 [Pyrus x bretschneideri]	mrna	22.7009	23.432	24.2431	7.00674	9.29345	7.24562	2.9889	1.57961	1.28521e-45	2.59753e-44	up	yes
EVM0017614	EVM0017614		EVM0017614.1	GO:0000976(transcription regulatory region sequence-specific DNA binding);GO:0003700(DNA binding transcription factor activity);GO:0005634(nucleus);GO:0032454(histone demethylase activity (H3-K9 specific));GO:0033169(histone H3-K9 demethylation);GO:0042742(defense response to bacterium);GO:2000028(regulation of photoperiodism, flowering)				Jumonji	PREDICTED: lysine-specific demethylase JMJ25 isoform X2 [Pyrus x bretschneideri]	mrna	8.91083	7.66629	9.47535	2.43054	2.63107	2.78418	3.32057	1.73143	1.31844e-45	2.66325e-44	up	yes
EVM0039828	EVM0039828		EVM0039828.1	GO:0003700(DNA binding transcription factor activity);GO:0005634(nucleus);GO:0006351(transcription, DNA-templated);GO:0006355(regulation of transcription, DNA-templated);GO:0016569(covalent chromatin modification);GO:0046872(metal ion binding);GO:0051213(dioxygenase activity);GO:0055114(oxidation-reduction process)				Jumonji	PREDICTED: putative lysine-specific demethylase JMJ16 [Pyrus x bretschneideri]	mrna	11.4861	11.1934	11.8512	5.62964	5.93724	4.58923	2.13732	1.0958	8.677e-28	9.32477e-27	up	yes
EVM0013222	EVM0013222		EVM0013222.1	GO:0003700(DNA binding transcription factor activity);GO:0005634(nucleus);GO:0006355(regulation of transcription, DNA-templated);GO:0043565(sequence-specific DNA binding)				Jumonji	hypothetical protein DVH24_013923, partial [Malus domestica]	mrna	1.76151	1.24544	1.77672	4.99904	5.87952	4.20104	0.317228	-1.65641	2.78655e-15	1.58577e-14	down	yes
EVM0009325	EVM0009325		EVM0009325.1	GO:0000792(heterochromatin);GO:0032454(histone demethylase activity (H3-K9 specific));GO:0045815(positive regulation of gene expression, epigenetic);GO:0048439(flower morphogenesis)				Jumonji	PREDICTED: lysine-specific demethylase JMJ706-like [Malus domestica]	mrna	0.680302	0.728005	0.89311	2.36249	2.4332	2.01496	0.337915	-1.56527	1.79453e-09	6.62839e-09	down	yes
EVM0022979	EVM0022979		EVM0022979.1	GO:0000987(proximal promoter sequence-specific DNA binding);GO:0003700(DNA binding transcription factor activity);GO:0005634(nucleus);GO:0010030(positive regulation of seed germination);GO:0033746(histone demethylase activity (H3-R2 specific));GO:0033749(histone demethylase activity (H4-R3 specific));GO:0043985(histone H4-R3 methylation)				Jumonji	PREDICTED: jmjC domain-containing protein 4 [Pyrus x bretschneideri]	mrna	2.13838	2.26795	2.23817	4.57632	5.66552	5.64634	0.418204	-1.25772	7.29872e-09	2.56425e-08	down	yes
EVM0038681	EVM0038681		EVM0038681.1	GO:0003677(DNA binding);GO:0003700(DNA binding transcription factor activity);GO:0005515(protein binding);GO:0005634(nucleus);GO:0006351(transcription, DNA-templated);GO:0006355(regulation of transcription, DNA-templated);GO:0009740(gibberellic acid mediated signaling pathway);GO:0009908(flower development);GO:0010077(maintenance of inflorescence meristem identity);GO:0010582(floral meristem dete…				LFY	LEAFY protein [Pyrus pyrifolia]	mrna	0.889777	1.41476	1.46792	4.40212	5.16508	5.54021	0.249709	-2.00168	4.9343e-12	2.25695e-11	down	yes
EVM0008406	EVM0008406		EVM0008406.1	GO:0003700(DNA binding transcription factor activity);GO:0003729(mRNA binding);GO:0005737(cytoplasm);GO:0005856(cytoskeleton);GO:0005886(plasma membrane);GO:0046872(metal ion binding);GO:0051015(actin filament binding);GO:0051017(actin filament bundle assembly)				LIM	hypothetical protein DVH24_039564 [Malus domestica]	mrna	44.5005	39.2817	40.3486	98.0359	93.1451	93.657	0.435795	-1.19828	9.22263e-29	1.03002e-27	down	yes
EVM0002192	EVM0002192		EVM0002192.1	GO:0003700(DNA binding transcription factor activity);GO:0003729(mRNA binding);GO:0005737(cytoplasm);GO:0005856(cytoskeleton);GO:0005886(plasma membrane);GO:0046872(metal ion binding);GO:0051015(actin filament binding);GO:0051017(actin filament bundle assembly)				LIM	PREDICTED: LIM domain-containing protein WLIM1-like [Malus domestica]	mrna	0.392494	0.631687	0.339391	0	0	0	4545.24	12.1501	9.24124e-07	2.68275e-06	up	yes
EVM0004824	EVM0004824		EVM0004824.1	GO:0003700(DNA binding transcription factor activity);GO:0003729(mRNA binding);GO:0005737(cytoplasm);GO:0005856(cytoskeleton);GO:0005886(plasma membrane);GO:0046872(metal ion binding);GO:0051015(actin filament binding);GO:0051017(actin filament bundle assembly)				LIM	hypothetical protein DVH24_039564 [Malus domestica]	mrna	2.0548	5.36592	4.08628	6.15485	6.34072	11.207	0.485475	-1.04253	0.0252436	0.0409044	down	yes
EVM0022688	EVM0022688		EVM0022688.1	GO:0005634(nucleus);GO:0006355(regulation of transcription, DNA-templated)				LOB	hypothetical protein DVH24_032170 [Malus domestica]	mrna	326.928	286.087	319.536	12.9955	19.3281	17.9972	18.5321	4.21195	2.472e-219	9.5969e-217	up	yes
EVM0003394	EVM0003394		EVM0003394.1	GO:0005634(nucleus);GO:0006355(regulation of transcription, DNA-templated)				LOB	PREDICTED: LOB domain-containing protein 41-like [Pyrus x bretschneideri]	mrna	118.613	92.6223	115.167	19.6558	18.877	21.9106	5.40013	2.43299	7.12822e-97	4.83901e-95	up	yes
EVM0037808	EVM0037808		EVM0037808.1	GO:0005515(protein binding);GO:0005634(nucleus);GO:0008150(biological_process)				LOB	PREDICTED: LOB domain-containing protein 37-like [Pyrus x bretschneideri]	mrna	41.513	45.0919	39.1335	9.38894	6.80774	7.10589	5.3959	2.43186	8.50937e-63	2.75531e-61	up	yes
EVM0030439	EVM0030439		EVM0030439.1	GO:0005515(protein binding);GO:0005634(nucleus);GO:0008150(biological_process)				LOB	PREDICTED: LOB domain-containing protein 37-like [Pyrus x bretschneideri]	mrna	42.4238	47.4424	49.4981	24.1295	21.044	22.596	2.05645	1.04015	6.71436e-24	6.08703e-23	up	yes
EVM0042581	EVM0042581		EVM0042581.1	GO:0005634(nucleus);GO:0006355(regulation of transcription, DNA-templated);GO:0009954(proximal/distal pattern formation);GO:0009965(leaf morphogenesis);GO:0048441(petal development)				LOB	PREDICTED: LOB domain-containing protein 36-like [Pyrus x bretschneideri]	mrna	0.750285	1.49453	1.43328	10.4893	8.36184	7.58714	0.13912	-2.8456	6.07461e-20	4.53333e-19	down	yes
EVM0011478	EVM0011478		EVM0011478.1	GO:0005515(protein binding);GO:0005634(nucleus);GO:0008150(biological_process)				LOB	PREDICTED: LOB domain-containing protein 37-like [Pyrus x bretschneideri]	mrna	5.25981	6.55798	2.71609	0.178355	0.393216	0.293214	16.8063	4.07093	1.11335e-18	7.77029e-18	up	yes
EVM0017478	EVM0017478		EVM0017478.1	GO:0005634(nucleus);GO:0006355(regulation of transcription, DNA-templated);GO:0009954(proximal/distal pattern formation);GO:0009965(leaf morphogenesis);GO:0048441(petal development)				LOB	PREDICTED: LOB domain-containing protein 36-like [Pyrus x bretschneideri]	mrna	1.22884	2.24721	2.25547	8.87137	6.99197	6.16253	0.260217	-1.94221	1.00873e-09	3.81707e-09	down	yes
EVM0035962	EVM0035962		EVM0035962.1	GO:0005634(nucleus);GO:0005739(mitochondrion);GO:0008150(biological_process)				LOB	PREDICTED: LOB domain-containing protein 1-like [Pyrus x bretschneideri]	mrna	1.21637	1.76075	1.70228	0.187338	0	0	24.9784	4.64261	4.69663e-07	1.40121e-06	up	yes
EVM0013247	EVM0013247		EVM0013247.1	GO:0005634(nucleus);GO:0005739(mitochondrion);GO:0008150(biological_process)				LOB	PREDICTED: LOB domain-containing protein 1-like [Malus domestica]	mrna	2.01603	1.02066	2.37183	0.358427	0	0.055872	13.0546	3.70649	1.22877e-05	3.17559e-05	up	yes
EVM0004860	EVM0004860		EVM0004860.1	GO:0005634(nucleus);GO:0005739(mitochondrion);GO:0008150(biological_process)				LOB	PREDICTED: LOB domain-containing protein 1-like [Pyrus x bretschneideri]	mrna	0.65225	3.11443	0.692608	6.92622	6.17314	7.30129	0.218586	-2.19373	2.48965e-05	6.22021e-05	down	yes
EVM0036384	EVM0036384		EVM0036384.1	GO:0005634(nucleus);GO:0008150(biological_process)				LOB	PREDICTED: LOB domain-containing protein 2-like [Malus domestica]	mrna	0.339042	0.319988	0.548662	0	0	0	4025.64	11.975	4.01111e-05	9.79106e-05	up	yes
EVM0006147	EVM0006147		EVM0006147.1	GO:0005515(protein binding);GO:0005634(nucleus);GO:0008150(biological_process)				LOB	PREDICTED: LOB domain-containing protein 15-like [Malus domestica]	mrna	0.396322	0.473494	1.1355	0.082363	0	0	24.3473	4.60569	4.29655e-05	0.000104509	up	yes
EVM0032694	EVM0032694		EVM0032694.1	GO:0005515(protein binding);GO:0005634(nucleus);GO:0005654(nucleoplasm);GO:0009799(specification of symmetry);GO:0009943(adaxial/abaxial axis specification);GO:0009944(polarity specification of adaxial/abaxial axis);GO:0009954(proximal/distal pattern formation);GO:0048441(petal development)				LOB	PREDICTED: LOB domain-containing protein 6-like [Malus domestica]	mrna	0.188477	0.880169	0.587735	2.08739	1.89495	2.66916	0.249024	-2.00565	0.000670795	0.00140189	down	yes
EVM0016629	EVM0016629		EVM0016629.1	GO:0005515(protein binding);GO:0005634(nucleus);GO:0008150(biological_process)				LOB	PREDICTED: LOB domain-containing protein 4 [Pyrus x bretschneideri]	mrna	0.394987	0.142663	0.407115	0	0.091068	0	10.3743	3.37494	0.0113831	0.0196534	up	yes
EVM0039857	EVM0039857		EVM0039857.1	GO:0005634(nucleus);GO:0009888(tissue development);GO:0010311(lateral root formation);GO:0045893(positive regulation of transcription, DNA-templated)				LOB	PREDICTED: LOB domain-containing protein 16-like [Pyrus x bretschneideri]	mrna	0.437902	0.918255	1.40053	0.359352	0.257359	0.364398	2.80977	1.49045	0.018989	0.0314799	up	yes
EVM0015284	EVM0015284		EVM0015284.1	GO:0005515(protein binding);GO:0005634(nucleus);GO:0008150(biological_process)				LOB	PREDICTED: LOB domain-containing protein 1-like [Pyrus x bretschneideri]	mrna	0	0.283439	0.21679	0	0	0	1667.43	10.7034	0.0288347	0.0462828	up	yes
EVM0016523	EVM0016523		EVM0016523.1	GO:0005515(protein binding);GO:0005634(nucleus);GO:0009555(pollen development);GO:0009556(microsporogenesis);GO:0009786(regulation of asymmetric cell division)				LOB	PREDICTED: LOB domain-containing protein 27-like [Pyrus x bretschneideri]	mrna	0.186285	0.031067	0.021854	0	0	0	797.353	9.63908	0.0291565	0.046759	up	yes
EVM0025025	EVM0025025		EVM0025025.1	GO:0009416(response to light stimulus);GO:0009686(gibberellin biosynthetic process);GO:0009740(gibberellic acid mediated signaling pathway);GO:0016707(gibberellin 3-beta-dioxygenase activity)	00904(Diterpenoid biosynthesis)	K04124	EC:1.14.11.15	LUG	PREDICTED: transcriptional corepressor LEUNIG-like isoform X2 [Pyrus x bretschneideri]	mrna	9.55728	9.99155	9.82759	4.02057	4.64719	3.99494	2.31992	1.21407	1.94002e-35	2.77234e-34	up	yes
EVM0041445	EVM0041445		EVM0041445.1	GO:0000118(histone deacetylase complex);GO:0003714(transcription corepressor activity);GO:0006357(regulation of transcription by RNA polymerase II);GO:0016575(histone deacetylation)				LUG	PREDICTED: transcriptional corepressor LEUNIG-like isoform X2 [Pyrus x bretschneideri]	mrna	2.23421	2.67064	2.70003	5.66545	5.59646	6.13709	0.437087	-1.19401	8.44524e-12	3.79349e-11	down	yes
EVM0032756	EVM0032756		EVM0032756.1	GO:0000900(translation repressor activity, mRNA regulatory element binding);GO:0000977(RNA polymerase II regulatory region sequence-specific DNA binding);GO:0003700(DNA binding transcription factor activity);GO:0005515(protein binding);GO:0005634(nucleus);GO:0006351(transcription, DNA-templated);GO:0009266(response to temperature stimulus);GO:0009910(negative regulation of flower development);GO:…				MADS-MIKC	PREDICTED: MADS-box protein JOINTLESS isoform X2 [Pyrus x bretschneideri]	mrna	4.29279	3.16783	3.13579	20.2555	20.719	19.6358	0.174829	-2.51599	4.74135e-39	7.70629e-38	down	yes
EVM0014153	EVM0014153		EVM0014153.1	GO:0000977(RNA polymerase II regulatory region sequence-specific DNA binding);GO:0003700(DNA binding transcription factor activity);GO:0005515(protein binding);GO:0005634(nucleus);GO:0006351(transcription, DNA-templated);GO:0006355(regulation of transcription, DNA-templated);GO:0009838(abscission);GO:0009909(regulation of flower development);GO:0010150(leaf senescence);GO:0030154(cell differentia…				MADS-MIKC	PREDICTED: MADS-box protein AGL42-like [Pyrus x bretschneideri]	mrna	0.412499	0.340027	1.30564	16.805	14.5595	19.2119	0.0406941	-4.61904	2.54984e-13	1.27182e-12	down	yes
EVM0032429	EVM0032429		EVM0032429.1	GO:0005515(protein binding)				MADS-MIKC	MADS-box protein [Pyrus pyrifolia var. culta]	mrna	15.1187	19.6441	17.0869	33.1008	36.8157	33.8561	0.499647	-1.00102	1.07377e-12	5.13646e-12	down	yes
EVM0021758	EVM0021758		EVM0021758.1	GO:0005515(protein binding)				MADS-MIKC	flowering locus C-like protein [Pyrus pyrifolia var. culta]	mrna	10.1129	8.69654	10.6857	4.06129	4.68857	3.22003	2.46411	1.30107	1.14961e-10	4.71601e-10	up	yes
EVM0017161	EVM0017161		EVM0017161.1	GO:0005515(protein binding)				MADS-MIKC	flowering locus C-like protein [Pyrus pyrifolia var. culta]	mrna	10.5509	12.5646	11.8105	26.2292	25.7231	22.3066	0.470329	-1.08826	1.23644e-10	5.05607e-10	down	yes
EVM0039545	EVM0039545		EVM0039545.1	GO:0005515(protein binding)				MADS-MIKC	MADS-box protein 5 [Pyrus x bretschneideri]	mrna	1.39602	1.25452	1.35303	0.284538	0.455151	0.268868	3.9696	1.98899	5.06923e-08	1.65318e-07	up	yes
EVM0016225	EVM0016225		EVM0016225.1	GO:0005515(protein binding)				MADS-MIKC	TM8-like MADS-box protein [Pyrus pyrifolia]	mrna	5.34326	4.49694	3.82727	0.797325	0.522167	1.89491	4.25195	2.08813	1.52288e-06	4.33055e-06	up	yes
EVM0002244	EVM0002244		EVM0002244.1	GO:0005515(protein binding)				MADS-MIKC	MADS-box protein [Pyrus pyrifolia var. culta]	mrna	0.185919	0.375085	0.182917	0	0	0	2479.74	11.276	1.10669e-05	2.87363e-05	up	yes
EVM0035889	EVM0035889		EVM0035889.1	GO:0005515(protein binding)				MADS-MIKC	hypothetical protein DVH24_011032 [Malus domestica]	mrna	1.22134	2.18415	0.88469	0.114995	0.354272	0	9.14231	3.19256	8.11518e-05	0.00019107	up	yes
EVM0039919	EVM0039919		EVM0039919.1	GO:0000977(RNA polymerase II regulatory region sequence-specific DNA binding);GO:0003700(DNA binding transcription factor activity);GO:0005515(protein binding);GO:0005634(nucleus);GO:0005737(cytoplasm);GO:0006351(transcription, DNA-templated);GO:0009739(response to gibberellin);GO:0010076(maintenance of floral meristem identity);GO:0010077(maintenance of inflorescence meristem identity);GO:001022…				MADS-MIKC	dormancy-associated MADS-box transcription factor [Pyrus pyrifolia var. culta]	mrna	1.2799	0.694413	1.92523	0.193634	0	0.518102	5.47891	2.45389	0.00667042	0.0120149	up	yes
EVM0024381	EVM0024381		EVM0024381.1	GO:0005515(protein binding)				MADS-MIKC	PREDICTED: truncated transcription factor CAULIFLOWER A-like isoform X1 [Pyrus x bretschneideri]	mrna	0	0.446423	0.462717	1.37461	1.26443	1.32231	0.229503	-2.12342	0.0271979	0.0438368	down	yes
EVM0018909	EVM0018909		EVM0018909.1	GO:0000976(transcription regulatory region sequence-specific DNA binding);GO:0000977(RNA polymerase II regulatory region sequence-specific DNA binding);GO:0003677(DNA binding);GO:0003700(DNA binding transcription factor activity);GO:0005634(nucleus);GO:0006351(transcription, DNA-templated);GO:0006355(regulation of transcription, DNA-templated);GO:0009553(embryo sac development);GO:0009658(chlorop…				MADS-M-type	PREDICTED: MADS-box transcription factor 50-like [Pyrus x bretschneideri]	mrna	1.23791	1.34999	1.64718	0.054869	0.058711	0	37.2873	5.22061	2.70937e-13	1.34994e-12	up	yes
EVM0009745	EVM0009745		EVM0009745.1	GO:0000987(proximal promoter sequence-specific DNA binding);GO:0003677(DNA binding);GO:0003700(DNA binding transcription factor activity);GO:0005515(protein binding);GO:0005634(nucleus);GO:0006351(transcription, DNA-templated);GO:0009555(pollen development);GO:0010152(pollen maturation);GO:0016021(integral component of membrane);GO:0043565(sequence-specific DNA binding);GO:0045944(positive regula…				MADS-M-type	PREDICTED: agamous-like MADS-box protein AGL30 isoform X4 [Malus domestica]	mrna	1.93003	1.87407	1.60768	6.0324	5.48735	4.92938	0.329001	-1.60384	3.34043e-11	1.43344e-10	down	yes
EVM0025377	EVM0025377		EVM0025377.1	GO:0005737(cytoplasm);GO:0030001(metal ion transport);GO:0046914(transition metal ion binding);GO:0046916(cellular transition metal ion homeostasis)				MADS-M-type	PREDICTED: heavy metal-associated isoprenylated plant protein 3 [Pyrus x bretschneideri]	mrna	7.50228	7.42883	15.8322	0	0.051646	0.256398	99.8667	6.64193	3.84204e-07	1.15568e-06	up	yes
EVM0012739	EVM0012739		EVM0012739.1	GO:0000976(transcription regulatory region sequence-specific DNA binding);GO:0000977(RNA polymerase II regulatory region sequence-specific DNA binding);GO:0000987(proximal promoter sequence-specific DNA binding);GO:0003677(DNA binding);GO:0003700(DNA binding transcription factor activity);GO:0005515(protein binding);GO:0005634(nucleus);GO:0006351(transcription, DNA-templated);GO:0043078(polar nuc…				MADS-M-type	PREDICTED: agamous-like MADS-box protein AGL80 [Pyrus x bretschneideri]	mrna	0.375811	0.446222	0.213155	1.60699	1.72372	3.54236	0.150615	-2.73106	3.10273e-05	7.6707e-05	down	yes
EVM0030311	EVM0030311		EVM0030311.1	GO:0003677(DNA binding);GO:0003700(DNA binding transcription factor activity);GO:0005634(nucleus);GO:0006355(regulation of transcription, DNA-templated);GO:0046983(protein dimerization activity)				MADS-M-type	hypothetical protein DVH24_002257 [Malus domestica]	mrna	0.459141	0.220821	0.805855	0	0	0	4952.72	12.274	7.02909e-05	0.000166655	up	yes
EVM0007981	EVM0007981		EVM0007981.1	GO:0000977(RNA polymerase II regulatory region sequence-specific DNA binding);GO:0003700(DNA binding transcription factor activity);GO:0005515(protein binding);GO:0005634(nucleus);GO:0005737(cytoplasm);GO:0006351(transcription, DNA-templated);GO:0009739(response to gibberellin);GO:0010076(maintenance of floral meristem identity);GO:0010077(maintenance of inflorescence meristem identity);GO:001022…				MADS-M-type	PREDICTED: LOW QUALITY PROTEIN: MADS-box protein AGL24-like [Pyrus x bretschneideri]	mrna	5.29586	4.59379	7.11133	2.19476	2.97615	2.29347	2.27762	1.18752	0.000542153	0.00114915	up	yes
EVM0025255	EVM0025255		EVM0025255.1	GO:0000976(transcription regulatory region sequence-specific DNA binding);GO:0000977(RNA polymerase II regulatory region sequence-specific DNA binding);GO:0000987(proximal promoter sequence-specific DNA binding);GO:0003677(DNA binding);GO:0003700(DNA binding transcription factor activity);GO:0005515(protein binding);GO:0005634(nucleus);GO:0006351(transcription, DNA-templated);GO:0043078(polar nuc…				MADS-M-type	PREDICTED: agamous-like MADS-box protein AGL80 [Pyrus x bretschneideri]	mrna	0.111346	0.064557	0.067417	0.589071	0.525504	1.46438	0.0943482	-3.40586	0.00146108	0.00291676	down	yes
EVM0038926	EVM0038926		EVM0038926.1	GO:0000976(transcription regulatory region sequence-specific DNA binding);GO:0000977(RNA polymerase II regulatory region sequence-specific DNA binding);GO:0000987(proximal promoter sequence-specific DNA binding);GO:0003677(DNA binding);GO:0003700(DNA binding transcription factor activity);GO:0005515(protein binding);GO:0005634(nucleus);GO:0006351(transcription, DNA-templated);GO:0043078(polar nuc…				MADS-M-type	PREDICTED: agamous-like MADS-box protein AGL80 [Pyrus x bretschneideri]	mrna	0.488505	0.206026	0.690701	0	0	0.089655	15.4507	3.9496	0.00212062	0.00414399	up	yes
EVM0040379	EVM0040379		EVM0040379.1	GO:0000976(transcription regulatory region sequence-specific DNA binding);GO:0000977(RNA polymerase II regulatory region sequence-specific DNA binding);GO:0000987(proximal promoter sequence-specific DNA binding);GO:0003677(DNA binding);GO:0003700(DNA binding transcription factor activity);GO:0005515(protein binding);GO:0005634(nucleus);GO:0006351(transcription, DNA-templated);GO:0043078(polar nuc…				MADS-M-type	PREDICTED: agamous-like MADS-box protein AGL80 [Pyrus x bretschneideri]	mrna	0.116541	0	0	0.415565	0.840384	1.20657	0.0473259	-4.40123	0.00264179	0.00508165	down	yes
EVM0025265	EVM0025265		EVM0025265.1	GO:0000977(RNA polymerase II regulatory region sequence-specific DNA binding);GO:0003677(DNA binding);GO:0003700(DNA binding transcription factor activity);GO:0005515(protein binding);GO:0005634(nucleus);GO:0006351(transcription, DNA-templated);GO:0009555(pollen development);GO:0010152(pollen maturation);GO:0044212(transcription regulatory region DNA binding);GO:0045944(positive regulation of tra…				MADS-M-type	PREDICTED: agamous-like MADS-box protein AGL104 isoform X1 [Pyrus x bretschneideri]	mrna	0.440779	0.538931	0.602433	0	0.182384	0	8.67479	3.11683	0.00675957	0.0121608	up	yes
EVM0023242	EVM0023242		EVM0023242.1	GO:0003677(DNA binding);GO:0003713(transcription coactivator activity);GO:0005634(nucleus);GO:0005730(nucleolus);GO:0005737(cytoplasm);GO:0006351(transcription, DNA-templated);GO:0009723(response to ethylene);GO:0043565(sequence-specific DNA binding);GO:0045893(positive regulation of transcription, DNA-templated)				MBF1	PREDICTED: uncharacterized protein LOC103937865 [Pyrus x bretschneideri]	mrna	8.05545	8.62055	7.19712	0.351542	0.195911	0.193904	32.2019	5.00907	4.94882e-47	1.04261e-45	up	yes
EVM0036813	EVM0036813		EVM0036813.1	GO:0003677(DNA binding);GO:0003700(DNA binding transcription factor activity);GO:0003713(transcription coactivator activity);GO:0005622(intracellular);GO:0005634(nucleus);GO:0005730(nucleolus);GO:0005737(cytoplasm);GO:0006351(transcription, DNA-templated);GO:0009408(response to heat);GO:0009414(response to water deprivation);GO:0009723(response to ethylene);GO:0009737(response to abscisic acid);G…				MBF1	hypothetical protein DVH24_017937 [Malus domestica]	mrna	37.4197	38.9846	38.7497	12.5193	18.3105	16.4286	2.43669	1.28492	2.23556e-23	1.97153e-22	up	yes
EVM0001149	EVM0001149		EVM0001149.1	GO:0016592(mediator complex);GO:0070847(core mediator complex)				MED7	PREDICTED: mediator of RNA polymerase II transcription subunit 7a-like [Malus domestica]	mrna	0	0	0	2.26531	2.04495	2.97228	4.11944e-05	-14.5672	4.94437e-10	1.92003e-09	down	yes
EVM0004668	EVM0004668		EVM0004668.1	GO:0003690(double-stranded DNA binding);GO:0006355(regulation of transcription, DNA-templated);GO:0009507(chloroplast);GO:0016020(membrane)				mTERF	PREDICTED: uncharacterized protein LOC103961895 isoform X2 [Pyrus x bretschneideri]	mrna	1.13975	1.01686	1.14526	4.45494	4.21088	3.7842	0.26521	-1.91479	2.2203e-17	1.43288e-16	down	yes
EVM0030620	EVM0030620		EVM0030620.1	GO:0004252(serine-type endopeptidase activity);GO:0005618(cell wall)				mTERF	PREDICTED: transcription termination factor MTERF8, chloroplastic [Pyrus x bretschneideri]	mrna	7.07952	6.42896	9.96353	2.86488	2.02631	2.11546	3.34996	1.74414	1.1117e-16	6.88239e-16	up	yes
EVM0039390	EVM0039390		EVM0039390.1	GO:0003690(double-stranded DNA binding);GO:0006355(regulation of transcription, DNA-templated);GO:0009507(chloroplast);GO:0016020(membrane)				mTERF	PREDICTED: uncharacterized protein LOC103938232 [Pyrus x bretschneideri]	mrna	1.827	1.64318	1.37759	5.38359	4.30351	4.83695	0.333776	-1.58305	1.58588e-12	7.48721e-12	down	yes
EVM0027255	EVM0027255		EVM0027255.1	GO:0003690(double-stranded DNA binding);GO:0006355(regulation of transcription, DNA-templated);GO:0009507(chloroplast);GO:0016020(membrane)				mTERF	PREDICTED: uncharacterized protein LOC103952174 [Pyrus x bretschneideri]	mrna	1.63343	2.19243	1.97689	5.6997	6.49702	4.99823	0.337469	-1.56717	4.57531e-12	2.09635e-11	down	yes
EVM0017006	EVM0017006		EVM0017006.1	GO:0009507(chloroplast);GO:0042646(plastid nucleoid)				mTERF	PREDICTED: uncharacterized protein LOC103444852 [Malus domestica]	mrna	5.33687	6.76765	4.51228	14.3703	13.4967	17.2542	0.36827	-1.44116	7.4477e-12	3.35836e-11	down	yes
EVM0034588	EVM0034588		EVM0034588.1	GO:0003690(double-stranded DNA binding);GO:0006355(regulation of transcription, DNA-templated);GO:0009507(chloroplast);GO:0016020(membrane)				mTERF	hypothetical protein DVH24_019744 [Malus domestica]	mrna	4.17605	4.57407	4.41737	10.0887	9.88536	8.97439	0.45486	-1.1365	4.50569e-11	1.90995e-10	down	yes
EVM0030698	EVM0030698		EVM0030698.1	GO:0003690(double-stranded DNA binding);GO:0006355(regulation of transcription, DNA-templated);GO:0009507(chloroplast);GO:0016020(membrane)				mTERF	PREDICTED: transcription termination factor MTERF15, mitochondrial-like [Pyrus x bretschneideri]	mrna	3.31477	4.09559	3.07288	8.98354	8.39674	8.62461	0.403126	-1.3107	4.59755e-11	1.94689e-10	down	yes
EVM0012298	EVM0012298		EVM0012298.3	GO:0003690(double-stranded DNA binding);GO:0006355(regulation of transcription, DNA-templated);GO:0009507(chloroplast);GO:0016020(membrane)				mTERF	PREDICTED: transcription termination factor MTERF15, mitochondrial-like [Pyrus x bretschneideri]	mrna	0.770823	0.853849	0.921059	2.36953	2.85167	2.22635	0.341821	-1.54869	5.1764e-10	2.00644e-09	down	yes
EVM0026428	EVM0026428		EVM0026428.1	GO:0003690(double-stranded DNA binding);GO:0006355(regulation of transcription, DNA-templated)				mTERF	PREDICTED: uncharacterized protein LOC103962208 [Pyrus x bretschneideri]	mrna	1.87913	1.98362	2.85238	6.66712	6.10781	6.1561	0.354716	-1.49527	5.04952e-09	1.79657e-08	down	yes
EVM0028963	EVM0028963		EVM0028963.1	GO:0003690(double-stranded DNA binding);GO:0006355(regulation of transcription, DNA-templated);GO:0009507(chloroplast);GO:0016020(membrane)				mTERF	PREDICTED: uncharacterized protein LOC103435974 [Malus domestica]	mrna	0.729643	1.12205	1.06279	2.94269	3.16688	3.1313	0.315391	-1.66479	7.02488e-09	2.47131e-08	down	yes
EVM0010442	EVM0010442		EVM0010442.1	GO:0003690(double-stranded DNA binding);GO:0006355(regulation of transcription, DNA-templated);GO:0009507(chloroplast);GO:0016020(membrane)				mTERF	PREDICTED: transcription termination factor MTERF6, chloroplastic/mitochondrial-like [Pyrus x bretschneideri]	mrna	0.501841	0.749439	0.661387	1.79684	1.8714	2.15581	0.328409	-1.60644	1.00569e-08	3.4902e-08	down	yes
EVM0032280	EVM0032280		EVM0032280.1	GO:0003690(double-stranded DNA binding);GO:0005739(mitochondrion);GO:0006355(regulation of transcription, DNA-templated);GO:0009507(chloroplast)				mTERF	PREDICTED: uncharacterized protein LOC103967783 [Pyrus x bretschneideri]	mrna	1.15575	1.00279	1.04504	3.61343	3.55288	2.7293	0.323738	-1.6271	1.57013e-07	4.8989e-07	down	yes
EVM0005234	EVM0005234		EVM0005234.1	GO:0003690(double-stranded DNA binding);GO:0006355(regulation of transcription, DNA-templated);GO:0009507(chloroplast);GO:0016020(membrane)				mTERF	PREDICTED: transcription termination factor MTERF6, chloroplastic/mitochondrial-like [Pyrus x bretschneideri]	mrna	0.66749	0.76158	0.828083	2.05751	1.50245	2.47802	0.373826	-1.41956	9.16322e-07	2.66072e-06	down	yes
EVM0034331	EVM0034331		EVM0034331.1	GO:0003690(double-stranded DNA binding);GO:0006355(regulation of transcription, DNA-templated);GO:0009507(chloroplast);GO:0016020(membrane)				mTERF	PREDICTED: transcription termination factor MTERF15, mitochondrial-like isoform X2 [Pyrus x bretschneideri]	mrna	1.04324	1.22084	1.42051	3.097	2.81642	3.25734	0.401776	-1.31554	1.07354e-06	3.09362e-06	down	yes
EVM0037676	EVM0037676		EVM0037676.1	GO:0005739(mitochondrion);GO:0009536(plastid);GO:0042255(ribosome assembly)				mTERF	PREDICTED: transcription termination factor MTEF18, mitochondrial-like [Pyrus x bretschneideri]	mrna	0.203902	0.076917	0.073992	0.844769	0.60379	1.15549	0.136254	-2.87563	2.01364e-06	5.66173e-06	down	yes
EVM0026435	EVM0026435		EVM0026435.1	GO:0003690(double-stranded DNA binding);GO:0005739(mitochondrion);GO:0006355(regulation of transcription, DNA-templated);GO:0009507(chloroplast)				mTERF	PREDICTED: uncharacterized protein LOC103967783 [Pyrus x bretschneideri]	mrna	0.772823	0.974266	1.01801	1.83187	2.31111	1.91447	0.456479	-1.13138	2.28916e-05	5.742e-05	down	yes
EVM0027966	EVM0027966		EVM0027966.1	GO:0003690(double-stranded DNA binding);GO:0005739(mitochondrion);GO:0006355(regulation of transcription, DNA-templated);GO:0032502(developmental process)				mTERF	PREDICTED: transcription termination factor MTERF6, chloroplastic/mitochondrial-like [Pyrus x bretschneideri]	mrna	0.837804	0.854412	0.895967	0.244449	0.408072	0.191801	3.0654	1.61607	0.000685291	0.0014305	up	yes
EVM0010217	EVM0010217		EVM0010217.1	GO:0003690(double-stranded DNA binding);GO:0006355(regulation of transcription, DNA-templated);GO:0009507(chloroplast);GO:0016020(membrane)				mTERF	PREDICTED: transcription termination factor MTERF2, chloroplastic-like [Malus domestica]	mrna	0.065968	0.228854	0.130546	0.456579	0.58634	0.744376	0.237995	-2.07099	0.0020993	0.00410485	down	yes
EVM0022064	EVM0022064		EVM0022064.1	GO:0003690(double-stranded DNA binding);GO:0003727(single-stranded RNA binding);GO:0005739(mitochondrion);GO:0006353(DNA-templated transcription, termination);GO:0006355(regulation of transcription, DNA-templated);GO:0007005(mitochondrion organization);GO:0008380(RNA splicing);GO:0009507(chloroplast);GO:0009658(chloroplast organization);GO:0019843(rRNA binding);GO:0032502(developmental process);G…				mTERF	PREDICTED: transcription termination factor MTEF18, mitochondrial-like [Pyrus x bretschneideri]	mrna	0.248857	0.256799	0.285133	0.803686	1.139	0.679077	0.301625	-1.72917	0.00348407	0.00658591	down	yes
EVM0024702	EVM0024702		EVM0024702.1	GO:0003690(double-stranded DNA binding);GO:0005739(mitochondrion);GO:0006355(regulation of transcription, DNA-templated);GO:0032502(developmental process)				mTERF	PREDICTED: uncharacterized protein LOC103933738 [Pyrus x bretschneideri]	mrna	0.700439	1.03067	1.25698	2.88162	1.51688	2.92382	0.408081	-1.29307	0.00357322	0.00674007	down	yes
EVM0033184	EVM0033184		EVM0033184.1	GO:0000981(RNA polymerase II transcription factor activity, sequence-specific DNA binding);GO:0001135(transcription factor activity, RNA polymerase II transcription factor recruiting);GO:0003677(DNA binding);GO:0003700(DNA binding transcription factor activity);GO:0005515(protein binding);GO:0005634(nucleus);GO:0006351(transcription, DNA-templated);GO:0006355(regulation of transcription, DNA-temp…				MYB	PREDICTED: transcription factor MYB44-like [Pyrus x bretschneideri]	mrna	116.217	116.158	127.778	13.8118	13.9992	12.6896	8.89254	3.1526	1.7034e-264	8.5789e-262	up	yes
EVM0035509	EVM0035509		EVM0035509.1	GO:0000981(RNA polymerase II transcription factor activity, sequence-specific DNA binding);GO:0001135(transcription factor activity, RNA polymerase II transcription factor recruiting);GO:0003677(DNA binding);GO:0003700(DNA binding transcription factor activity);GO:0005515(protein binding);GO:0005634(nucleus);GO:0006351(transcription, DNA-templated);GO:0006355(regulation of transcription, DNA-temp…				MYB	PREDICTED: transcription factor TT2 [Pyrus x bretschneideri]	mrna	5.67673	3.45744	3.34376	55.7693	49.5356	48.3675	0.0811983	-3.62241	5.7027e-82	2.87208e-80	down	yes
EVM0005967	EVM0005967		EVM0005967.2	GO:0000793(condensed chromosome);GO:0000981(RNA polymerase II transcription factor activity, sequence-specific DNA binding);GO:0001135(transcription factor activity, RNA polymerase II transcription factor recruiting);GO:0003677(DNA binding);GO:0003700(DNA binding transcription factor activity);GO:0005515(protein binding);GO:0005634(nucleus);GO:0005730(nucleolus);GO:0006351(transcription, DNA-temp…				MYB	hypothetical protein DVH24_004431 [Malus domestica]	mrna	22.7991	23.1484	23.69	76.5243	76.6021	66.3881	0.317235	-1.65638	4.04412e-65	1.39815e-63	down	yes
EVM0034378	EVM0034378		EVM0034378.1	GO:0000981(RNA polymerase II transcription factor activity, sequence-specific DNA binding);GO:0001135(transcription factor activity, RNA polymerase II transcription factor recruiting);GO:0003677(DNA binding);GO:0003700(DNA binding transcription factor activity);GO:0005515(protein binding);GO:0005634(nucleus);GO:0006351(transcription, DNA-templated);GO:0006357(regulation of transcription by RNA po…				MYB	PREDICTED: myb-related protein 308-like [Pyrus x bretschneideri]	mrna	6.57855	9.08788	7.18175	56.29	50.8988	44.6892	0.150438	-2.73276	1.97195e-60	6.03884e-59	down	yes
EVM0005694	EVM0005694		EVM0005694.1	GO:0000981(RNA polymerase II transcription factor activity, sequence-specific DNA binding);GO:0001135(transcription factor activity, RNA polymerase II transcription factor recruiting);GO:0003677(DNA binding);GO:0003700(DNA binding transcription factor activity);GO:0005634(nucleus);GO:0006351(transcription, DNA-templated);GO:0006355(regulation of transcription, DNA-templated);GO:0006357(regulation…				MYB	PREDICTED: transcription repressor MYB5-like [Pyrus x bretschneideri]	mrna	8.01651	7.60227	9.46133	34.9202	32.0337	30.5169	0.257309	-1.95843	5.882e-51	1.37959e-49	down	yes
EVM0029048	EVM0029048		EVM0029048.1	GO:0003677(DNA binding);GO:0003700(DNA binding transcription factor activity);GO:0005515(protein binding);GO:0005634(nucleus);GO:0006351(transcription, DNA-templated);GO:0009651(response to salt stress);GO:0009733(response to auxin);GO:0009739(response to gibberellin);GO:0009751(response to salicylic acid);GO:0009753(response to jasmonic acid);GO:0046686(response to cadmium ion)				MYB	PREDICTED: transcription factor DIVARICATA-like [Pyrus x bretschneideri]	mrna	49.3873	42.8791	49.576	16.3116	13.1651	14.3027	3.23993	1.69596	1.88518e-49	4.25038e-48	up	yes
EVM0004434	EVM0004434		EVM0004434.1	GO:0000981(RNA polymerase II transcription factor activity, sequence-specific DNA binding);GO:0001135(transcription factor activity, RNA polymerase II transcription factor recruiting);GO:0003677(DNA binding);GO:0003700(DNA binding transcription factor activity);GO:0005515(protein binding);GO:0005634(nucleus);GO:0005737(cytoplasm);GO:0006355(regulation of transcription, DNA-templated);GO:0006357(r…				MYB	hypothetical protein DVH24_042526 [Malus domestica]	mrna	8.82645	8.02646	12.1915	0.169185	0.460335	0.653043	22.6456	4.50116	1.24449e-40	2.13343e-39	up	yes
EVM0003640	EVM0003640		EVM0003640.1	GO:0000981(RNA polymerase II transcription factor activity, sequence-specific DNA binding);GO:0001135(transcription factor activity, RNA polymerase II transcription factor recruiting);GO:0003677(DNA binding);GO:0003700(DNA binding transcription factor activity);GO:0005515(protein binding);GO:0005634(nucleus);GO:0006351(transcription, DNA-templated);GO:0006357(regulation of transcription by RNA po…				MYB	PREDICTED: myb-related protein 308-like [Pyrus x bretschneideri]	mrna	0.544567	0.434352	0.539808	8.42111	7.59327	8.73663	0.0613602	-4.02655	3.54238e-34	4.87702e-33	down	yes
EVM0039104	EVM0039104		EVM0039104.1	GO:0000981(RNA polymerase II transcription factor activity, sequence-specific DNA binding);GO:0001135(transcription factor activity, RNA polymerase II transcription factor recruiting);GO:0003677(DNA binding);GO:0003700(DNA binding transcription factor activity);GO:0005515(protein binding);GO:0005634(nucleus);GO:0006351(transcription, DNA-templated);GO:0006355(regulation of transcription, DNA-temp…				MYB	PREDICTED: transcription factor MYB44 [Pyrus x bretschneideri]	mrna	10.8821	11.4415	10.8766	4.63544	4.37363	4.15564	2.52191	1.33452	1.07307e-33	1.45638e-32	up	yes
EVM0014550	EVM0014550		EVM0014550.1	GO:0000981(RNA polymerase II transcription factor activity, sequence-specific DNA binding);GO:0001135(transcription factor activity, RNA polymerase II transcription factor recruiting);GO:0003677(DNA binding);GO:0003700(DNA binding transcription factor activity);GO:0005515(protein binding);GO:0005634(nucleus);GO:0006351(transcription, DNA-templated);GO:0006355(regulation of transcription, DNA-temp…				MYB	PREDICTED: transcription factor MYB44-like [Pyrus x bretschneideri]	mrna	64.9637	75.6334	70.2999	27.1617	32.9792	31.473	2.30202	1.2029	5.60382e-33	7.40861e-32	up	yes
EVM0018854	EVM0018854		EVM0018854.1	GO:0000981(RNA polymerase II transcription factor activity, sequence-specific DNA binding);GO:0001135(transcription factor activity, RNA polymerase II transcription factor recruiting);GO:0003677(DNA binding);GO:0003700(DNA binding transcription factor activity);GO:0005515(protein binding);GO:0005634(nucleus);GO:0005737(cytoplasm);GO:0006355(regulation of transcription, DNA-templated);GO:0006357(r…				MYB	PREDICTED: transcription factor MYB39-like [Pyrus x bretschneideri]	mrna	4.34673	4.50066	6.88798	0.068239	0	0.100686	93.15	6.54148	6.84469e-33	9.02671e-32	up	yes
EVM0040954	EVM0040954		EVM0040954.1	GO:0000981(RNA polymerase II transcription factor activity, sequence-specific DNA binding);GO:0001135(transcription factor activity, RNA polymerase II transcription factor recruiting);GO:0003677(DNA binding);GO:0003700(DNA binding transcription factor activity);GO:0005515(protein binding);GO:0005634(nucleus);GO:0006351(transcription, DNA-templated);GO:0006357(regulation of transcription by RNA po…				MYB	PREDICTED: myb-related protein 308-like [Pyrus x bretschneideri]	mrna	2.77735	2.05236	2.14971	13.0723	13.8083	13.4954	0.172861	-2.53232	2.10453e-28	2.31779e-27	down	yes
EVM0025269	EVM0025269		EVM0025269.1	GO:0000793(condensed chromosome);GO:0000981(RNA polymerase II transcription factor activity, sequence-specific DNA binding);GO:0001135(transcription factor activity, RNA polymerase II transcription factor recruiting);GO:0003677(DNA binding);GO:0003700(DNA binding transcription factor activity);GO:0005515(protein binding);GO:0005634(nucleus);GO:0005730(nucleolus);GO:0006351(transcription, DNA-temp…				MYB	PREDICTED: transcription factor AS1 [Pyrus x bretschneideri]	mrna	13.0118	21.3431	16.482	73.3633	75.1705	59.8087	0.244007	-2.03501	4.5034e-28	4.88893e-27	down	yes
EVM0018267	EVM0018267		EVM0018267.1	GO:0000981(RNA polymerase II transcription factor activity, sequence-specific DNA binding);GO:0001135(transcription factor activity, RNA polymerase II transcription factor recruiting);GO:0003677(DNA binding);GO:0003700(DNA binding transcription factor activity);GO:0005515(protein binding);GO:0005634(nucleus);GO:0006351(transcription, DNA-templated);GO:0006357(regulation of transcription by RNA po…				MYB	PREDICTED: myb-related protein 308-like [Pyrus x bretschneideri]	mrna	3.14045	2.47728	2.46582	13.8543	15.3066	13.881	0.187807	-2.41268	5.1766e-28	5.60997e-27	down	yes
EVM0005208	EVM0005208		EVM0005208.1	GO:0000981(RNA polymerase II transcription factor activity, sequence-specific DNA binding);GO:0001135(transcription factor activity, RNA polymerase II transcription factor recruiting);GO:0003677(DNA binding);GO:0003700(DNA binding transcription factor activity);GO:0005515(protein binding);GO:0005634(nucleus);GO:0006351(transcription, DNA-templated);GO:0006357(regulation of transcription by RNA po…				MYB	MYB2 [Eriobotrya japonica]	mrna	4.81299	6.53704	5.17913	18.4717	18.539	18.5712	0.297384	-1.7496	3.2763e-26	3.293e-25	down	yes
EVM0022269	EVM0022269		EVM0022269.1	GO:0000981(RNA polymerase II transcription factor activity, sequence-specific DNA binding);GO:0001135(transcription factor activity, RNA polymerase II transcription factor recruiting);GO:0003677(DNA binding);GO:0003700(DNA binding transcription factor activity);GO:0005515(protein binding);GO:0005634(nucleus);GO:0005737(cytoplasm);GO:0006355(regulation of transcription, DNA-templated);GO:0006357(r…				MYB	PREDICTED: transcription factor MYB39-like [Pyrus x bretschneideri]	mrna	4.13529	5.30475	9.02939	0.142837	0.05698	0.368057	32.5238	5.02342	3.4406e-25	3.3091e-24	up	yes
EVM0017966	EVM0017966		EVM0017966.1	GO:0000981(RNA polymerase II transcription factor activity, sequence-specific DNA binding);GO:0001135(transcription factor activity, RNA polymerase II transcription factor recruiting);GO:0003677(DNA binding);GO:0003700(DNA binding transcription factor activity);GO:0005515(protein binding);GO:0005634(nucleus);GO:0006351(transcription, DNA-templated);GO:0006355(regulation of transcription, DNA-temp…				MYB	PREDICTED: transcription factor MYB90-like isoform X1 [Malus domestica]	mrna	0.61111	0.656096	0.77677	5.30557	6.14113	5.24412	0.122461	-3.0296	1.13742e-24	1.0702e-23	down	yes
EVM0033497	EVM0033497		EVM0033497.1	GO:0003677(DNA binding);GO:0003700(DNA binding transcription factor activity);GO:0005634(nucleus);GO:0006351(transcription, DNA-templated);GO:0006355(regulation of transcription, DNA-templated)				MYB	PREDICTED: transcription factor DIVARICATA [Pyrus x bretschneideri]	mrna	17.3641	19.4635	22.3707	7.08348	7.36515	5.72881	2.93389	1.55281	1.28817e-24	1.20868e-23	up	yes
EVM0026466	EVM0026466		EVM0026466.1	GO:0000981(RNA polymerase II transcription factor activity, sequence-specific DNA binding);GO:0001135(transcription factor activity, RNA polymerase II transcription factor recruiting);GO:0003677(DNA binding);GO:0003700(DNA binding transcription factor activity);GO:0005634(nucleus);GO:0006355(regulation of transcription, DNA-templated);GO:0006357(regulation of transcription by RNA polymerase II);G…				MYB	PREDICTED: uncharacterized protein LOC103950850 isoform X1 [Pyrus x bretschneideri]	mrna	6.6081	4.58676	4.20148	17.6026	17.3532	16.6796	0.298174	-1.74578	7.03826e-24	6.36981e-23	down	yes
EVM0001720	EVM0001720		EVM0001720.1	GO:0000981(RNA polymerase II transcription factor activity, sequence-specific DNA binding);GO:0001135(transcription factor activity, RNA polymerase II transcription factor recruiting);GO:0003677(DNA binding);GO:0003700(DNA binding transcription factor activity);GO:0005634(nucleus);GO:0006355(regulation of transcription, DNA-templated);GO:0006357(regulation of transcription by RNA polymerase II);G…				MYB	PREDICTED: transcription factor MYB36-like [Pyrus x bretschneideri]	mrna	2.46595	2.36163	5.32135	0.154714	0.174751	0.143205	21.4715	4.42435	1.63928e-23	1.45497e-22	up	yes
EVM0018898	EVM0018898		EVM0018898.1	GO:0000981(RNA polymerase II transcription factor activity, sequence-specific DNA binding);GO:0001135(transcription factor activity, RNA polymerase II transcription factor recruiting);GO:0003677(DNA binding);GO:0003700(DNA binding transcription factor activity);GO:0005515(protein binding);GO:0005634(nucleus);GO:0006351(transcription, DNA-templated);GO:0006355(regulation of transcription, DNA-temp…				MYB	PREDICTED: transcription factor WER-like [Pyrus x bretschneideri]	mrna	3.20201	4.82391	4.358	16.6252	19.5474	16.473	0.235232	-2.08784	1.05443e-21	8.57091e-21	down	yes
EVM0033950	EVM0033950		EVM0033950.1	GO:0003677(DNA binding);GO:0003700(DNA binding transcription factor activity);GO:0005634(nucleus);GO:0006351(transcription, DNA-templated);GO:0006355(regulation of transcription, DNA-templated)				MYB	hypothetical protein DVH24_013620 [Malus domestica]	mrna	16.6379	19.6765	22.0672	4.83397	7.69102	5.9937	3.15258	1.65653	3.39851e-20	2.56967e-19	up	yes
EVM0033002	EVM0033002		EVM0033002.1	GO:0000902(cell morphogenesis);GO:0000981(RNA polymerase II transcription factor activity, sequence-specific DNA binding);GO:0001135(transcription factor activity, RNA polymerase II transcription factor recruiting);GO:0003677(DNA binding);GO:0003700(DNA binding transcription factor activity);GO:0005634(nucleus);GO:0006351(transcription, DNA-templated);GO:0006355(regulation of transcription, DNA-t…				MYB	PREDICTED: myb-related protein 330-like [Pyrus x bretschneideri]	mrna	2.47268	5.40957	2.69893	19.1626	18.875	19.255	0.184687	-2.43685	6.42091e-19	4.54945e-18	down	yes
EVM0015391	EVM0015391		EVM0015391.1	GO:0000981(RNA polymerase II transcription factor activity, sequence-specific DNA binding);GO:0001135(transcription factor activity, RNA polymerase II transcription factor recruiting);GO:0003677(DNA binding);GO:0003700(DNA binding transcription factor activity);GO:0005634(nucleus);GO:0006351(transcription, DNA-templated);GO:0006357(regulation of transcription by RNA polymerase II);GO:0007275(mult…				MYB	hypothetical protein DVH24_029131 [Malus domestica]	mrna	0.079074	0	0	4.13232	4.9848	3.97009	0.00604208	-7.37074	9.93963e-19	6.96316e-18	down	yes
EVM0001842	EVM0001842		EVM0001842.1	GO:0000981(RNA polymerase II transcription factor activity, sequence-specific DNA binding);GO:0001135(transcription factor activity, RNA polymerase II transcription factor recruiting);GO:0003677(DNA binding);GO:0003700(DNA binding transcription factor activity);GO:0005634(nucleus);GO:0006351(transcription, DNA-templated);GO:0006355(regulation of transcription, DNA-templated);GO:0006357(regulation…				MYB	PREDICTED: myb-related protein Myb4-like [Pyrus x bretschneideri]	mrna	3.2222	2.47765	4.10927	0.141546	0.224736	0.305162	14.609	3.86879	1.37046e-18	9.51658e-18	up	yes
EVM0025783	EVM0025783		EVM0025783.1	GO:0000981(RNA polymerase II transcription factor activity, sequence-specific DNA binding);GO:0001135(transcription factor activity, RNA polymerase II transcription factor recruiting);GO:0003677(DNA binding);GO:0003700(DNA binding transcription factor activity);GO:0005515(protein binding);GO:0005634(nucleus);GO:0006351(transcription, DNA-templated);GO:0006355(regulation of transcription, DNA-temp…				MYB	PREDICTED: transcription factor MYB114-like [Pyrus x bretschneideri]	mrna	0	0	0	8.79038	7.92582	12.4377	1.02902e-05	-16.5684	1.41136e-18	9.79334e-18	down	yes
EVM0002312	EVM0002312		EVM0002312.1	GO:0000981(RNA polymerase II transcription factor activity, sequence-specific DNA binding);GO:0001135(transcription factor activity, RNA polymerase II transcription factor recruiting);GO:0003677(DNA binding);GO:0003700(DNA binding transcription factor activity);GO:0003713(transcription coactivator activity);GO:0005634(nucleus);GO:0006351(transcription, DNA-templated);GO:0006355(regulation of tran…				MYB	PREDICTED: myb-related protein 3R-1-like isoform X1 [Pyrus x bretschneideri]	mrna	8.02377	7.42848	7.87212	22.6429	19.8701	15.736	0.400425	-1.32039	1.34342e-17	8.7654e-17	down	yes
EVM0021221	EVM0021221		EVM0021221.2	GO:0000981(RNA polymerase II transcription factor activity, sequence-specific DNA binding);GO:0001135(transcription factor activity, RNA polymerase II transcription factor recruiting);GO:0003677(DNA binding);GO:0003700(DNA binding transcription factor activity);GO:0005634(nucleus);GO:0006351(transcription, DNA-templated);GO:0006355(regulation of transcription, DNA-templated);GO:0006357(regulation…				MYB	PREDICTED: transcription factor GAMYB-like isoform X1 [Malus domestica]	mrna	1.92898	1.58137	1.67025	5.32224	4.53112	5.7244	0.332564	-1.5883	1.67325e-17	1.08698e-16	down	yes
EVM0020871	EVM0020871		EVM0020871.1	GO:0000981(RNA polymerase II transcription factor activity, sequence-specific DNA binding);GO:0001135(transcription factor activity, RNA polymerase II transcription factor recruiting);GO:0003677(DNA binding);GO:0003700(DNA binding transcription factor activity);GO:0005515(protein binding);GO:0005634(nucleus);GO:0005737(cytoplasm);GO:0006355(regulation of transcription, DNA-templated);GO:0006357(r…				MYB	PREDICTED: transcription factor MYB39-like [Pyrus x bretschneideri]	mrna	3.43647	2.67093	3.4444	0	0	0	31839.3	14.9585	9.59792e-17	5.96672e-16	up	yes
EVM0012110	EVM0012110		EVM0012110.1	GO:0000981(RNA polymerase II transcription factor activity, sequence-specific DNA binding);GO:0001135(transcription factor activity, RNA polymerase II transcription factor recruiting);GO:0003677(DNA binding);GO:0003700(DNA binding transcription factor activity);GO:0005634(nucleus);GO:0005737(cytoplasm);GO:0006355(regulation of transcription, DNA-templated);GO:0006357(regulation of transcription b…				MYB	PREDICTED: transcription factor MYB23-like [Malus domestica]	mrna	2.31875	4.67451	3.03573	0.140201	0.307548	0.131557	17.3121	4.11371	2.99556e-16	1.80679e-15	up	yes
EVM0023543	EVM0023543		EVM0023543.1	GO:0000981(RNA polymerase II transcription factor activity, sequence-specific DNA binding);GO:0001135(transcription factor activity, RNA polymerase II transcription factor recruiting);GO:0003677(DNA binding);GO:0003700(DNA binding transcription factor activity);GO:0005515(protein binding);GO:0005634(nucleus);GO:0006351(transcription, DNA-templated);GO:0006355(regulation of transcription, DNA-temp…				MYB	PREDICTED: anthocyanin regulatory C1 protein-like [Pyrus x bretschneideri]	mrna	1.49638	2.56218	3.27804	11.6089	14.3024	15.1983	0.178464	-2.48629	7.6262e-16	4.50572e-15	down	yes
EVM0025173	EVM0025173		EVM0025173.1	GO:0000981(RNA polymerase II transcription factor activity, sequence-specific DNA binding);GO:0001135(transcription factor activity, RNA polymerase II transcription factor recruiting);GO:0003677(DNA binding);GO:0003700(DNA binding transcription factor activity);GO:0005634(nucleus);GO:0006351(transcription, DNA-templated);GO:0006357(regulation of transcription by RNA polymerase II);GO:0007275(mult…				MYB	PREDICTED: trichome differentiation protein GL1 [Pyrus x bretschneideri]	mrna	0.538088	0.615274	0.214245	4.05676	5.28506	3.90522	0.103239	-3.27594	8.94392e-16	5.26423e-15	down	yes
EVM0016744	EVM0016744		EVM0016744.1	GO:0000981(RNA polymerase II transcription factor activity, sequence-specific DNA binding);GO:0001135(transcription factor activity, RNA polymerase II transcription factor recruiting);GO:0003677(DNA binding);GO:0003700(DNA binding transcription factor activity);GO:0005515(protein binding);GO:0005634(nucleus);GO:0006355(regulation of transcription, DNA-templated);GO:0006357(regulation of transcrip…				MYB	PREDICTED: myb-related protein 306 [Pyrus x bretschneideri]	mrna	23.2731	25.8278	19.8745	8.40789	11.368	11.6948	2.19173	1.13207	1.86755e-14	1.00639e-13	up	yes
EVM0003041	EVM0003041		EVM0003041.1	GO:0000981(RNA polymerase II transcription factor activity, sequence-specific DNA binding);GO:0001135(transcription factor activity, RNA polymerase II transcription factor recruiting);GO:0003677(DNA binding);GO:0003700(DNA binding transcription factor activity);GO:0005634(nucleus);GO:0006351(transcription, DNA-templated);GO:0006355(regulation of transcription, DNA-templated);GO:0006357(regulation…				MYB	PREDICTED: myb-related protein P-like [Pyrus x bretschneideri]	mrna	0.182335	0.15432	0.269852	1.8339	1.72538	2.94289	0.0932775	-3.42233	2.63704e-14	1.40701e-13	down	yes
EVM0012112	EVM0012112		EVM0012112.1	GO:0000981(RNA polymerase II transcription factor activity, sequence-specific DNA binding);GO:0001135(transcription factor activity, RNA polymerase II transcription factor recruiting);GO:0003677(DNA binding);GO:0003700(DNA binding transcription factor activity);GO:0005515(protein binding);GO:0005634(nucleus);GO:0006351(transcription, DNA-templated);GO:0006355(regulation of transcription, DNA-temp…				MYB	PREDICTED: transcription factor MYB114-like [Pyrus x bretschneideri]	mrna	3.35246	7.23969	2.43139	55.0911	51.3803	52.2995	0.0820273	-3.60775	3.12049e-14	1.65572e-13	down	yes
EVM0032556	EVM0032556		EVM0032556.1	GO:0000981(RNA polymerase II transcription factor activity, sequence-specific DNA binding);GO:0001135(transcription factor activity, RNA polymerase II transcription factor recruiting);GO:0003677(DNA binding);GO:0003700(DNA binding transcription factor activity);GO:0005515(protein binding);GO:0005634(nucleus);GO:0006351(transcription, DNA-templated);GO:0006355(regulation of transcription, DNA-temp…				MYB	PREDICTED: myb-related protein 330-like [Pyrus x bretschneideri]	mrna	1.84713	1.25211	1.39126	5.45204	4.76547	4.30498	0.30921	-1.69334	3.89748e-14	2.0554e-13	down	yes
EVM0000673	EVM0000673		EVM0000673.1	GO:0000981(RNA polymerase II transcription factor activity, sequence-specific DNA binding);GO:0001135(transcription factor activity, RNA polymerase II transcription factor recruiting);GO:0003677(DNA binding);GO:0003700(DNA binding transcription factor activity);GO:0005634(nucleus);GO:0006355(regulation of transcription, DNA-templated);GO:0006357(regulation of transcription by RNA polymerase II);G…				MYB	PREDICTED: transcription factor MYB108-like [Pyrus x bretschneideri]	mrna	14.9001	21.3734	19.6444	0.666217	1.1298	0.175105	28.3686	4.82622	4.4486e-14	2.33843e-13	up	yes
EVM0017284	EVM0017284		EVM0017284.1	GO:0000981(RNA polymerase II transcription factor activity, sequence-specific DNA binding);GO:0001135(transcription factor activity, RNA polymerase II transcription factor recruiting);GO:0003677(DNA binding);GO:0003700(DNA binding transcription factor activity);GO:0005634(nucleus);GO:0006355(regulation of transcription, DNA-templated);GO:0006357(regulation of transcription by RNA polymerase II);G…				MYB	PREDICTED: transcription repressor MYB6-like [Pyrus x bretschneideri]	mrna	1.34763	1.71235	2.4269	0	0	0	18289.6	14.1587	8.11172e-14	4.1872e-13	up	yes
EVM0005551	EVM0005551		EVM0005551.1	GO:0000981(RNA polymerase II transcription factor activity, sequence-specific DNA binding);GO:0001135(transcription factor activity, RNA polymerase II transcription factor recruiting);GO:0003677(DNA binding);GO:0003700(DNA binding transcription factor activity);GO:0005634(nucleus);GO:0006351(transcription, DNA-templated);GO:0006355(regulation of transcription, DNA-templated);GO:0006357(regulation…				MYB	PREDICTED: transcription factor MYB59-like [Pyrus x bretschneideri]	mrna	1.48583	1.81176	1.0692	6.36682	6.2103	7.85477	0.213724	-2.22618	4.96908e-13	2.42971e-12	down	yes
EVM0032626	EVM0032626		EVM0032626.1	GO:0000981(RNA polymerase II transcription factor activity, sequence-specific DNA binding);GO:0001135(transcription factor activity, RNA polymerase II transcription factor recruiting);GO:0003677(DNA binding);GO:0003700(DNA binding transcription factor activity);GO:0005634(nucleus);GO:0006351(transcription, DNA-templated);GO:0006355(regulation of transcription, DNA-templated);GO:0006357(regulation…				MYB	PREDICTED: transcription factor MYB21-like [Pyrus x bretschneideri]	mrna	10.8972	17.8387	10.4633	4.21986	3.13966	1.72329	4.31575	2.10961	6.90938e-13	3.34553e-12	up	yes
EVM0005126	EVM0005126		EVM0005126.1	GO:0000981(RNA polymerase II transcription factor activity, sequence-specific DNA binding);GO:0001135(transcription factor activity, RNA polymerase II transcription factor recruiting);GO:0003677(DNA binding);GO:0003700(DNA binding transcription factor activity);GO:0005515(protein binding);GO:0005634(nucleus);GO:0006351(transcription, DNA-templated);GO:0006355(regulation of transcription, DNA-temp…				MYB	PREDICTED: transcription repressor MYB5-like [Pyrus x bretschneideri]	mrna	3.64094	6.13506	3.11476	14.7256	14.9886	19.272	0.263151	-1.92604	7.49361e-12	3.37783e-11	down	yes
EVM0016295	EVM0016295		EVM0016295.1	GO:0000981(RNA polymerase II transcription factor activity, sequence-specific DNA binding);GO:0001135(transcription factor activity, RNA polymerase II transcription factor recruiting);GO:0003677(DNA binding);GO:0003700(DNA binding transcription factor activity);GO:0005634(nucleus);GO:0006355(regulation of transcription, DNA-templated);GO:0006357(regulation of transcription by RNA polymerase II);G…				MYB	PREDICTED: transcription factor MYB21-like [Pyrus x bretschneideri]	mrna	2.24539	1.77529	1.42751	0	0	0.027092	201.099	7.65177	9.37962e-12	4.19802e-11	up	yes
EVM0031686	EVM0031686		EVM0031686.1	GO:0000981(RNA polymerase II transcription factor activity, sequence-specific DNA binding);GO:0001135(transcription factor activity, RNA polymerase II transcription factor recruiting);GO:0003700(DNA binding transcription factor activity);GO:0005634(nucleus);GO:0006351(transcription, DNA-templated);GO:0006355(regulation of transcription, DNA-templated);GO:0006357(regulation of transcription by RNA…				MYB	hypothetical protein DVH24_007193 [Malus domestica]	mrna	1.12297	0.234463	0.426945	4.57631	4.54925	6.01401	0.117862	-3.08483	3.17304e-11	1.36412e-10	down	yes
EVM0031433	EVM0031433		EVM0031433.1	GO:0000981(RNA polymerase II transcription factor activity, sequence-specific DNA binding);GO:0001135(transcription factor activity, RNA polymerase II transcription factor recruiting);GO:0003677(DNA binding);GO:0003700(DNA binding transcription factor activity);GO:0005515(protein binding);GO:0005634(nucleus);GO:0006351(transcription, DNA-templated);GO:0006355(regulation of transcription, DNA-temp…				MYB	PREDICTED: myb-related protein Zm38-like [Pyrus x bretschneideri]	mrna	1.72683	1.14286	1.53524	6.24399	7.29684	4.00163	0.251101	-1.99366	1.46672e-10	5.96368e-10	down	yes
EVM0029624	EVM0029624		EVM0029624.1	GO:0000981(RNA polymerase II transcription factor activity, sequence-specific DNA binding);GO:0001135(transcription factor activity, RNA polymerase II transcription factor recruiting);GO:0003677(DNA binding);GO:0003700(DNA binding transcription factor activity);GO:0005515(protein binding);GO:0005634(nucleus);GO:0006351(transcription, DNA-templated);GO:0006355(regulation of transcription, DNA-temp…				MYB	PREDICTED: myb-related protein 308-like [Pyrus x bretschneideri]	mrna	7.65681	6.48889	9.99115	18.3571	21.5491	20.8148	0.397504	-1.33096	1.71724e-10	6.94366e-10	down	yes
EVM0033038	EVM0033038		EVM0033038.1	GO:0000981(RNA polymerase II transcription factor activity, sequence-specific DNA binding);GO:0001135(transcription factor activity, RNA polymerase II transcription factor recruiting);GO:0003677(DNA binding);GO:0003700(DNA binding transcription factor activity);GO:0005634(nucleus);GO:0006351(transcription, DNA-templated);GO:0006355(regulation of transcription, DNA-templated);GO:0006357(regulation…				MYB	PREDICTED: transcription repressor MYB6-like [Pyrus x bretschneideri]	mrna	7.66315	2.90016	3.3797	21.5321	19.1904	18.7611	0.234401	-2.09295	2.80585e-10	1.11364e-09	down	yes
EVM0033792	EVM0033792		EVM0033792.1	GO:0000902(cell morphogenesis);GO:0000981(RNA polymerase II transcription factor activity, sequence-specific DNA binding);GO:0001135(transcription factor activity, RNA polymerase II transcription factor recruiting);GO:0003677(DNA binding);GO:0003700(DNA binding transcription factor activity);GO:0005634(nucleus);GO:0006351(transcription, DNA-templated);GO:0006355(regulation of transcription, DNA-t…				MYB	PREDICTED: transcription factor MYB80-like [Pyrus x bretschneideri]	mrna	0	0	0	0.567529	0.970218	1.04089	0.000116341	-13.0694	1.72762e-09	6.392e-09	down	yes
EVM0038542	EVM0038542		EVM0038542.1	GO:0003677(DNA binding);GO:0003700(DNA binding transcription factor activity);GO:0005634(nucleus);GO:0006351(transcription, DNA-templated);GO:0006355(regulation of transcription, DNA-templated)				MYB	PREDICTED: transcription factor DIVARICATA-like [Pyrus x bretschneideri]	mrna	0.476035	0.339114	0.363968	1.53051	1.60505	1.68878	0.24441	-2.03262	1.97669e-09	7.27022e-09	down	yes
EVM0036606	EVM0036606		EVM0036606.1	GO:0000981(RNA polymerase II transcription factor activity, sequence-specific DNA binding);GO:0001135(transcription factor activity, RNA polymerase II transcription factor recruiting);GO:0003677(DNA binding);GO:0003700(DNA binding transcription factor activity);GO:0005634(nucleus);GO:0006351(transcription, DNA-templated);GO:0006355(regulation of transcription, DNA-templated);GO:0006357(regulation…				MYB	PREDICTED: transcription factor MYB86-like [Pyrus x bretschneideri]	mrna	1.67332	1.54687	1.65602	4.53354	4.65869	3.51804	0.383643	-1.38216	3.26569e-09	1.18015e-08	down	yes
EVM0013625	EVM0013625		EVM0013625.1	GO:0000981(RNA polymerase II transcription factor activity, sequence-specific DNA binding);GO:0001135(transcription factor activity, RNA polymerase II transcription factor recruiting);GO:0003677(DNA binding);GO:0003700(DNA binding transcription factor activity);GO:0005515(protein binding);GO:0005634(nucleus);GO:0006351(transcription, DNA-templated);GO:0006355(regulation of transcription, DNA-temp…				MYB	PREDICTED: transcription factor WER-like isoform X1 [Malus domestica]	mrna	1.8494	0.662958	0.533022	5.21708	5.32078	6.61843	0.177508	-2.49404	4.63794e-09	1.65646e-08	down	yes
EVM0030958	EVM0030958		EVM0030958.1	GO:0000981(RNA polymerase II transcription factor activity, sequence-specific DNA binding);GO:0001135(transcription factor activity, RNA polymerase II transcription factor recruiting);GO:0003677(DNA binding);GO:0003700(DNA binding transcription factor activity);GO:0005634(nucleus);GO:0006351(transcription, DNA-templated);GO:0006355(regulation of transcription, DNA-templated);GO:0006357(regulation…				MYB	PREDICTED: myb-related protein 308-like [Pyrus x bretschneideri]	mrna	0.446027	1.11286	1.85967	0	0.054967	0	62.193	5.95868	5.40152e-09	1.91723e-08	up	yes
EVM0030444	EVM0030444		EVM0030444.1	GO:0000981(RNA polymerase II transcription factor activity, sequence-specific DNA binding);GO:0001135(transcription factor activity, RNA polymerase II transcription factor recruiting);GO:0003677(DNA binding);GO:0003700(DNA binding transcription factor activity);GO:0005634(nucleus);GO:0006355(regulation of transcription, DNA-templated);GO:0006357(regulation of transcription by RNA polymerase II);G…				MYB	PREDICTED: LOW QUALITY PROTEIN: protein ODORANT1 [Pyrus x bretschneideri]	mrna	1.58484	1.07123	1.44088	0.144609	0.121754	0	15.3811	3.94308	1.07881e-08	3.73213e-08	up	yes
EVM0029106	EVM0029106		EVM0029106.1	GO:0000981(RNA polymerase II transcription factor activity, sequence-specific DNA binding);GO:0001135(transcription factor activity, RNA polymerase II transcription factor recruiting);GO:0003677(DNA binding);GO:0003700(DNA binding transcription factor activity);GO:0005515(protein binding);GO:0005634(nucleus);GO:0006351(transcription, DNA-templated);GO:0006355(regulation of transcription, DNA-temp…				MYB	hypothetical protein DVH24_020788 [Malus domestica]	mrna	24.5384	19.8803	15.9214	3.64915	9.30604	8.17541	2.85558	1.51378	2.52698e-08	8.46849e-08	up	yes
EVM0018088	EVM0018088		EVM0018088.1	GO:0000981(RNA polymerase II transcription factor activity, sequence-specific DNA binding);GO:0001135(transcription factor activity, RNA polymerase II transcription factor recruiting);GO:0003677(DNA binding);GO:0003700(DNA binding transcription factor activity);GO:0005515(protein binding);GO:0005634(nucleus);GO:0006351(transcription, DNA-templated);GO:0006355(regulation of transcription, DNA-temp…				MYB	PREDICTED: uncharacterized protein LOC103967156 [Pyrus x bretschneideri]	mrna	8.29083	8.86966	16.1985	32.7968	28.6522	26.5383	0.379135	-1.39922	3.81846e-08	1.2586e-07	down	yes
EVM0027011	EVM0027011		EVM0027011.1	GO:0000981(RNA polymerase II transcription factor activity, sequence-specific DNA binding);GO:0001135(transcription factor activity, RNA polymerase II transcription factor recruiting);GO:0003677(DNA binding);GO:0003700(DNA binding transcription factor activity);GO:0005634(nucleus);GO:0006351(transcription, DNA-templated);GO:0006355(regulation of transcription, DNA-templated);GO:0006357(regulation…				MYB	PREDICTED: myb-related protein Myb4-like [Pyrus x bretschneideri]	mrna	21.4843	13.362	15.8005	2.52257	7.88511	5.36016	3.21203	1.68349	4.47612e-08	1.46514e-07	up	yes
EVM0038277	EVM0038277		EVM0038277.1	GO:0000981(RNA polymerase II transcription factor activity, sequence-specific DNA binding);GO:0001135(transcription factor activity, RNA polymerase II transcription factor recruiting);GO:0003677(DNA binding);GO:0003700(DNA binding transcription factor activity);GO:0005634(nucleus);GO:0006355(regulation of transcription, DNA-templated);GO:0006357(regulation of transcription by RNA polymerase II);G…				MYB	PREDICTED: transcription factor MYB86-like [Pyrus x bretschneideri]	mrna	0.39378	0.335639	1.35665	0	0	0	6953.56	12.7635	5.25229e-08	1.70974e-07	up	yes
EVM0022354	EVM0022354		EVM0022354.1	GO:0000981(RNA polymerase II transcription factor activity, sequence-specific DNA binding);GO:0001135(transcription factor activity, RNA polymerase II transcription factor recruiting);GO:0003677(DNA binding);GO:0005634(nucleus);GO:0006351(transcription, DNA-templated);GO:0006357(regulation of transcription by RNA polymerase II);GO:0030154(cell differentiation);GO:0043565(sequence-specific DNA bin…				MYB	PREDICTED: transcription factor MYB86-like [Pyrus x bretschneideri]	mrna	1.84887	1.36916	1.55361	3.9016	4.51217	5.57153	0.34119	-1.55135	6.00018e-08	1.94081e-07	down	yes
EVM0035492	EVM0035492		EVM0035492.1	GO:0000981(RNA polymerase II transcription factor activity, sequence-specific DNA binding);GO:0001135(transcription factor activity, RNA polymerase II transcription factor recruiting);GO:0003677(DNA binding);GO:0003700(DNA binding transcription factor activity);GO:0005515(protein binding);GO:0005634(nucleus);GO:0006351(transcription, DNA-templated);GO:0006355(regulation of transcription, DNA-temp…				MYB	PREDICTED: uncharacterized protein LOC103950808 [Pyrus x bretschneideri]	mrna	2.62102	0.882232	0.843778	12.42	11.5614	10.7318	0.125227	-2.99738	7.69606e-08	2.46391e-07	down	yes
EVM0028429	EVM0028429		EVM0028429.1	GO:0000981(RNA polymerase II transcription factor activity, sequence-specific DNA binding);GO:0001135(transcription factor activity, RNA polymerase II transcription factor recruiting);GO:0003677(DNA binding);GO:0003700(DNA binding transcription factor activity);GO:0005634(nucleus);GO:0006355(regulation of transcription, DNA-templated);GO:0006357(regulation of transcription by RNA polymerase II);G…				MYB	PREDICTED: transcription factor MYB39-like [Pyrus x bretschneideri]	mrna	0.778213	0.251765	0.478989	0	0	0	5029.89	12.2963	1.29746e-07	4.07611e-07	up	yes
EVM0024336	EVM0024336		EVM0024336.1	GO:0000981(RNA polymerase II transcription factor activity, sequence-specific DNA binding);GO:0001135(transcription factor activity, RNA polymerase II transcription factor recruiting);GO:0003677(DNA binding);GO:0003700(DNA binding transcription factor activity);GO:0005634(nucleus);GO:0006355(regulation of transcription, DNA-templated);GO:0006357(regulation of transcription by RNA polymerase II);G…				MYB	transcription factor MYB88 [Malus domestica]	mrna	5.82169	3.84405	3.89929	9.81747	10.1908	9.68613	0.456821	-1.1303	2.02924e-07	6.26888e-07	down	yes
EVM0014164	EVM0014164		EVM0014164.1	GO:0000981(RNA polymerase II transcription factor activity, sequence-specific DNA binding);GO:0001135(transcription factor activity, RNA polymerase II transcription factor recruiting);GO:0003677(DNA binding);GO:0003700(DNA binding transcription factor activity);GO:0005515(protein binding);GO:0005634(nucleus);GO:0006351(transcription, DNA-templated);GO:0006355(regulation of transcription, DNA-temp…				MYB	R2R3 MYB transcription factor 10 [Cydonia oblonga]	mrna	1.17007	0.389494	0.605471	4.39815	3.16747	3.93953	0.18818	-2.40982	2.25065e-07	6.92418e-07	down	yes
EVM0002052	EVM0002052		EVM0002052.1	GO:0000902(cell morphogenesis);GO:0000981(RNA polymerase II transcription factor activity, sequence-specific DNA binding);GO:0001135(transcription factor activity, RNA polymerase II transcription factor recruiting);GO:0003677(DNA binding);GO:0003700(DNA binding transcription factor activity);GO:0005634(nucleus);GO:0006351(transcription, DNA-templated);GO:0006355(regulation of transcription, DNA-t…				MYB	PREDICTED: transcription factor MYB34 [Pyrus x bretschneideri]	mrna	18.8984	37.5376	25.1987	61.2034	63.8854	59.3795	0.442541	-1.17612	2.37031e-07	7.2737e-07	down	yes
EVM0020549	EVM0020549		EVM0020549.1	GO:0000981(RNA polymerase II transcription factor activity, sequence-specific DNA binding);GO:0001135(transcription factor activity, RNA polymerase II transcription factor recruiting);GO:0003677(DNA binding);GO:0003700(DNA binding transcription factor activity);GO:0005634(nucleus);GO:0006351(transcription, DNA-templated);GO:0006355(regulation of transcription, DNA-templated);GO:0006357(regulation…				MYB	PREDICTED: myb-related protein P-like [Pyrus x bretschneideri]	mrna	0.172291	0.088988	0.056769	0.826193	1.07519	1.29283	0.0995702	-3.32814	4.53438e-07	1.35454e-06	down	yes
EVM0016823	EVM0016823		EVM0016823.1	GO:0000981(RNA polymerase II transcription factor activity, sequence-specific DNA binding);GO:0001135(transcription factor activity, RNA polymerase II transcription factor recruiting);GO:0003677(DNA binding);GO:0003700(DNA binding transcription factor activity);GO:0005634(nucleus);GO:0006351(transcription, DNA-templated);GO:0006355(regulation of transcription, DNA-templated);GO:0006357(regulation…				MYB	PREDICTED: transcriptional activator Myb-like [Pyrus x bretschneideri]	mrna	0.954607	1.02234	0.65607	0.087124	0	0	30.2215	4.9175	9.73306e-07	2.81719e-06	up	yes
EVM0027619	EVM0027619		EVM0027619.1	GO:0000981(RNA polymerase II transcription factor activity, sequence-specific DNA binding);GO:0001135(transcription factor activity, RNA polymerase II transcription factor recruiting);GO:0003677(DNA binding);GO:0003700(DNA binding transcription factor activity);GO:0005515(protein binding);GO:0005524(ATP binding);GO:0005634(nucleus);GO:0006351(transcription, DNA-templated);GO:0006355(regulation of…				MYB	PREDICTED: myb-related protein 308-like [Pyrus x bretschneideri]	mrna	0.901856	0.295724	0.238723	3.27785	2.16711	3.42986	0.16184	-2.62736	1.49557e-06	4.25678e-06	down	yes
EVM0011834	EVM0011834		EVM0011834.1	GO:0000981(RNA polymerase II transcription factor activity, sequence-specific DNA binding);GO:0001135(transcription factor activity, RNA polymerase II transcription factor recruiting);GO:0003677(DNA binding);GO:0003700(DNA binding transcription factor activity);GO:0005634(nucleus);GO:0005737(cytoplasm);GO:0006355(regulation of transcription, DNA-templated);GO:0006357(regulation of transcription b…				MYB	PREDICTED: myb-related protein 306-like [Pyrus x bretschneideri]	mrna	1.42004	0.76818	1.39808	3.21575	3.76968	3.25758	0.350122	-1.51407	2.03061e-06	5.70601e-06	down	yes
EVM0037852	EVM0037852		EVM0037852.1	GO:0000981(RNA polymerase II transcription factor activity, sequence-specific DNA binding);GO:0001135(transcription factor activity, RNA polymerase II transcription factor recruiting);GO:0003677(DNA binding);GO:0003700(DNA binding transcription factor activity);GO:0005634(nucleus);GO:0006351(transcription, DNA-templated);GO:0006355(regulation of transcription, DNA-templated);GO:0006357(regulation…				MYB	hypothetical protein DVH24_003353, partial [Malus domestica]	mrna	0.360148	0.193979	0.109273	0	0	0	2211.33	11.1107	2.4409e-06	6.79895e-06	up	yes
EVM0002986	EVM0002986		EVM0002986.1	GO:0000981(RNA polymerase II transcription factor activity, sequence-specific DNA binding);GO:0001135(transcription factor activity, RNA polymerase II transcription factor recruiting);GO:0003677(DNA binding);GO:0003700(DNA binding transcription factor activity);GO:0005634(nucleus);GO:0006351(transcription, DNA-templated);GO:0006355(regulation of transcription, DNA-templated);GO:0006357(regulation…				MYB	PREDICTED: transcription factor MYB122-like [Pyrus x bretschneideri]	mrna	0.566306	1.03786	1.04182	0	0	0.11113	23.8099	4.57349	2.88154e-06	7.96324e-06	up	yes
EVM0028403	EVM0028403		EVM0028403.1	GO:0000981(RNA polymerase II transcription factor activity, sequence-specific DNA binding);GO:0001135(transcription factor activity, RNA polymerase II transcription factor recruiting);GO:0003677(DNA binding);GO:0003700(DNA binding transcription factor activity);GO:0005515(protein binding);GO:0005634(nucleus);GO:0006351(transcription, DNA-templated);GO:0006355(regulation of transcription, DNA-temp…				MYB	PREDICTED: transcription factor WER-like [Pyrus x bretschneideri]	mrna	0.414705	0.444785	0	3.84932	2.56346	2.72931	0.0940146	-3.41097	4.08247e-06	1.11066e-05	down	yes
EVM0009909	EVM0009909		EVM0009909.1	GO:0000981(RNA polymerase II transcription factor activity, sequence-specific DNA binding);GO:0001135(transcription factor activity, RNA polymerase II transcription factor recruiting);GO:0003677(DNA binding);GO:0003700(DNA binding transcription factor activity);GO:0005515(protein binding);GO:0005634(nucleus);GO:0006351(transcription, DNA-templated);GO:0006355(regulation of transcription, DNA-temp…				MYB	PREDICTED: transcription factor WER-like [Pyrus x bretschneideri]	mrna	0.325755	0.146067	0	6.50424	5.15776	4.36266	0.0294435	-5.08591	6.29513e-06	1.67977e-05	down	yes
EVM0002796	EVM0002796		EVM0002796.1	GO:0000981(RNA polymerase II transcription factor activity, sequence-specific DNA binding);GO:0001135(transcription factor activity, RNA polymerase II transcription factor recruiting);GO:0003677(DNA binding);GO:0003700(DNA binding transcription factor activity);GO:0005634(nucleus);GO:0006351(transcription, DNA-templated);GO:0006355(regulation of transcription, DNA-templated);GO:0006357(regulation…				MYB	PREDICTED: myb-related protein Myb4-like [Pyrus x bretschneideri]	mrna	2.54475	2.02726	2.29391	4.39448	7.89966	6.17842	0.371682	-1.42786	7.97876e-06	2.10402e-05	down	yes
EVM0040989	EVM0040989		EVM0040989.1	GO:0000981(RNA polymerase II transcription factor activity, sequence-specific DNA binding);GO:0001135(transcription factor activity, RNA polymerase II transcription factor recruiting);GO:0003677(DNA binding);GO:0003700(DNA binding transcription factor activity);GO:0005634(nucleus);GO:0006351(transcription, DNA-templated);GO:0006355(regulation of transcription, DNA-templated);GO:0006357(regulation…				MYB	PREDICTED: transcription factor MYB46-like [Pyrus x bretschneideri]	mrna	0.52699	0.294282	0.385859	0	0	0	4023.77	11.9743	9.02859e-06	2.36779e-05	up	yes
EVM0021545	EVM0021545		EVM0021545.1	GO:0000981(RNA polymerase II transcription factor activity, sequence-specific DNA binding);GO:0001135(transcription factor activity, RNA polymerase II transcription factor recruiting);GO:0003677(DNA binding);GO:0003700(DNA binding transcription factor activity);GO:0005634(nucleus);GO:0006351(transcription, DNA-templated);GO:0006355(regulation of transcription, DNA-templated);GO:0006357(regulation…				MYB	PREDICTED: protein ODORANT1-like [Pyrus x bretschneideri]	mrna	1.0259	1.19478	1.07859	0.191626	0	0	17.2173	4.10579	2.81156e-05	6.98094e-05	up	yes
EVM0029028	EVM0029028		EVM0029028.1	GO:0000981(RNA polymerase II transcription factor activity, sequence-specific DNA binding);GO:0001135(transcription factor activity, RNA polymerase II transcription factor recruiting);GO:0003677(DNA binding);GO:0003700(DNA binding transcription factor activity);GO:0005634(nucleus);GO:0006351(transcription, DNA-templated);GO:0006355(regulation of transcription, DNA-templated);GO:0006357(regulation…				MYB	PREDICTED: myb-related protein 306-like [Pyrus x bretschneideri]	mrna	3.96283	2.58008	3.04738	1.74164	1.5842	1.11879	2.15772	1.10951	2.85513e-05	7.08536e-05	up	yes
EVM0025373	EVM0025373		EVM0025373.1	GO:0000981(RNA polymerase II transcription factor activity, sequence-specific DNA binding);GO:0001135(transcription factor activity, RNA polymerase II transcription factor recruiting);GO:0003677(DNA binding);GO:0003700(DNA binding transcription factor activity);GO:0005634(nucleus);GO:0006351(transcription, DNA-templated);GO:0006355(regulation of transcription, DNA-templated);GO:0006357(regulation…				MYB	PREDICTED: protein ODORANT1-like [Pyrus x bretschneideri]	mrna	0.764238	0.840548	0.687263	0.16535	0.054967	0.197574	5.4848	2.45544	4.99522e-05	0.000120535	up	yes
EVM0000770	EVM0000770		EVM0000770.1	GO:0000981(RNA polymerase II transcription factor activity, sequence-specific DNA binding);GO:0001135(transcription factor activity, RNA polymerase II transcription factor recruiting);GO:0003677(DNA binding);GO:0003700(DNA binding transcription factor activity);GO:0005634(nucleus);GO:0006355(regulation of transcription, DNA-templated);GO:0006357(regulation of transcription by RNA polymerase II);G…				MYB	PREDICTED: transcription factor WER-like isoform X2 [Pyrus x bretschneideri]	mrna	0.253184	0.481789	0.119031	0	0	0	2846.68	11.4751	0.000132515	0.000303547	up	yes
EVM0028083	EVM0028083		EVM0028083.1	GO:0009908(flower development);GO:0048262(determination of dorsal/ventral asymmetry)				MYB	PREDICTED: transcription factor DIVARICATA-like [Pyrus x bretschneideri]	mrna	0.732879	1.11768	1.19356	3.10807	3.35023	2.11165	0.355209	-1.49326	0.00022781	0.00050679	down	yes
EVM0002163	EVM0002163		EVM0002163.1	GO:0000981(RNA polymerase II transcription factor activity, sequence-specific DNA binding);GO:0001135(transcription factor activity, RNA polymerase II transcription factor recruiting);GO:0003677(DNA binding);GO:0003700(DNA binding transcription factor activity);GO:0005634(nucleus);GO:0006351(transcription, DNA-templated);GO:0006355(regulation of transcription, DNA-templated);GO:0006357(regulation…				MYB	PREDICTED: transcription factor MYB46-like [Pyrus x bretschneideri]	mrna	0.863353	0.662912	0.393645	0	0.115115	0.102822	8.80947	3.13906	0.000243566	0.000540132	up	yes
EVM0023388	EVM0023388		EVM0023388.1	GO:0000981(RNA polymerase II transcription factor activity, sequence-specific DNA binding);GO:0001135(transcription factor activity, RNA polymerase II transcription factor recruiting);GO:0003677(DNA binding);GO:0003700(DNA binding transcription factor activity);GO:0005634(nucleus);GO:0006351(transcription, DNA-templated);GO:0006355(regulation of transcription, DNA-templated);GO:0006357(regulation…				MYB	PREDICTED: transcription factor MYB46-like [Pyrus x bretschneideri]	mrna	2.62501	1.21693	0.609956	0.470144	0.36826	0.18985	4.32958	2.11423	0.000265453	0.000585465	up	yes
EVM0015642	EVM0015642		EVM0015642.1	GO:0000981(RNA polymerase II transcription factor activity, sequence-specific DNA binding);GO:0001135(transcription factor activity, RNA polymerase II transcription factor recruiting);GO:0003677(DNA binding);GO:0003700(DNA binding transcription factor activity);GO:0005634(nucleus);GO:0006351(transcription, DNA-templated);GO:0006355(regulation of transcription, DNA-templated);GO:0006357(regulation…				MYB	PREDICTED: transcription factor MYB108-like [Pyrus x bretschneideri]	mrna	0.59004	1.67948	0.91665	0.277791	0.191596	0	6.78794	2.76297	0.000442613	0.000949396	up	yes
EVM0039048	EVM0039048		EVM0039048.1	GO:0000981(RNA polymerase II transcription factor activity, sequence-specific DNA binding);GO:0001135(transcription factor activity, RNA polymerase II transcription factor recruiting);GO:0003677(DNA binding);GO:0003700(DNA binding transcription factor activity);GO:0005515(protein binding);GO:0005634(nucleus);GO:0006355(regulation of transcription, DNA-templated);GO:0006357(regulation of transcrip…				MYB	PREDICTED: transcription factor MYB44-like [Pyrus x bretschneideri]	mrna	0.515324	1.57593	1.84664	0.245875	0.243184	0	8.05198	3.00934	0.000489627	0.00104334	up	yes
EVM0000971	EVM0000971		EVM0000971.1	GO:0000981(RNA polymerase II transcription factor activity, sequence-specific DNA binding);GO:0001135(transcription factor activity, RNA polymerase II transcription factor recruiting);GO:0003700(DNA binding transcription factor activity);GO:0005634(nucleus);GO:0006355(regulation of transcription, DNA-templated);GO:0006357(regulation of transcription by RNA polymerase II);GO:0030154(cell different…				MYB	PREDICTED: protein ODORANT1-like [Pyrus x bretschneideri]	mrna	2.671	3.81753	1.43657	0.843288	0.555507	1.52252	2.71285	1.43981	0.000798564	0.00165352	up	yes
EVM0021840	EVM0021840		EVM0021840.1	GO:0000981(RNA polymerase II transcription factor activity, sequence-specific DNA binding);GO:0001135(transcription factor activity, RNA polymerase II transcription factor recruiting);GO:0003677(DNA binding);GO:0003700(DNA binding transcription factor activity);GO:0005515(protein binding);GO:0005634(nucleus);GO:0006351(transcription, DNA-templated);GO:0006355(regulation of transcription, DNA-temp…				MYB	PREDICTED: transcription factor WER-like [Malus domestica]	mrna	0	0	0	0.587671	0.325718	0.416927	0.00022551	-12.1145	0.00163235	0.00324044	down	yes
EVM0017655	EVM0017655		EVM0017655.1	GO:0000981(RNA polymerase II transcription factor activity, sequence-specific DNA binding);GO:0001135(transcription factor activity, RNA polymerase II transcription factor recruiting);GO:0003677(DNA binding);GO:0003700(DNA binding transcription factor activity);GO:0005634(nucleus);GO:0006351(transcription, DNA-templated);GO:0006355(regulation of transcription, DNA-templated);GO:0006357(regulation…				MYB	PREDICTED: transcription factor RAX1-like [Pyrus x bretschneideri]	mrna	2.38828	0.516538	2.2401	0.652938	0.312665	0.63095	3.22251	1.68819	0.00174147	0.00344312	up	yes
EVM0026674	EVM0026674		EVM0026674.1	GO:0000981(RNA polymerase II transcription factor activity, sequence-specific DNA binding);GO:0001135(transcription factor activity, RNA polymerase II transcription factor recruiting);GO:0003677(DNA binding);GO:0003700(DNA binding transcription factor activity);GO:0005515(protein binding);GO:0005634(nucleus);GO:0006351(transcription, DNA-templated);GO:0006355(regulation of transcription, DNA-temp…				MYB	MYBa [Pyrus pyrifolia]	mrna	0.497595	0.409323	0.824235	2.21778	1.25062	2.3048	0.29986	-1.73764	0.00181455	0.00357925	down	yes
EVM0010841	EVM0010841		EVM0010841.1	GO:0000981(RNA polymerase II transcription factor activity, sequence-specific DNA binding);GO:0001135(transcription factor activity, RNA polymerase II transcription factor recruiting);GO:0002237(response to molecule of bacterial origin);GO:0003677(DNA binding);GO:0003700(DNA binding transcription factor activity);GO:0005515(protein binding);GO:0005634(nucleus);GO:0006351(transcription, DNA-templa…				MYB	PREDICTED: myb-related protein Myb4-like [Pyrus x bretschneideri]	mrna	0.25429	0.457054	0.6242	0.080858	0.092364	0.167309	3.92195	1.97157	0.00277754	0.0053271	up	yes
EVM0017963	EVM0017963		EVM0017963.1	GO:0000981(RNA polymerase II transcription factor activity, sequence-specific DNA binding);GO:0001135(transcription factor activity, RNA polymerase II transcription factor recruiting);GO:0003677(DNA binding);GO:0003700(DNA binding transcription factor activity);GO:0005634(nucleus);GO:0006351(transcription, DNA-templated);GO:0006355(regulation of transcription, DNA-templated);GO:0006357(regulation…				MYB	PREDICTED: transcription factor MYB80 [Pyrus x bretschneideri]	mrna	0.630946	2.86584	1.04794	0.458015	0.217815	0.641724	3.44937	1.78633	0.00359295	0.00677557	up	yes
EVM0011009	EVM0011009		EVM0011009.1	GO:0000981(RNA polymerase II transcription factor activity, sequence-specific DNA binding);GO:0001135(transcription factor activity, RNA polymerase II transcription factor recruiting);GO:0003677(DNA binding);GO:0003700(DNA binding transcription factor activity);GO:0005515(protein binding);GO:0005524(ATP binding);GO:0005634(nucleus);GO:0006351(transcription, DNA-templated);GO:0006355(regulation of…				MYB	transcription factor WER [Prunus persica]	mrna	1.06798	0.641278	0.937604	1.92921	2.38059	2.59701	0.383225	-1.38374	0.00447912	0.00831668	down	yes
EVM0009479	EVM0009479		EVM0009479.1	GO:0000981(RNA polymerase II transcription factor activity, sequence-specific DNA binding);GO:0001135(transcription factor activity, RNA polymerase II transcription factor recruiting);GO:0003677(DNA binding);GO:0003700(DNA binding transcription factor activity);GO:0005634(nucleus);GO:0006351(transcription, DNA-templated);GO:0006355(regulation of transcription, DNA-templated);GO:0006357(regulation…				MYB	PREDICTED: transcriptional activator Myb [Pyrus x bretschneideri]	mrna	0.982031	0.980137	1.00334	0.345135	0	0	8.5923	3.10305	0.00562369	0.0102629	up	yes
EVM0016496	EVM0016496		EVM0016496.1	GO:0000981(RNA polymerase II transcription factor activity, sequence-specific DNA binding);GO:0001135(transcription factor activity, RNA polymerase II transcription factor recruiting);GO:0003677(DNA binding);GO:0003700(DNA binding transcription factor activity);GO:0005634(nucleus);GO:0006351(transcription, DNA-templated);GO:0006355(regulation of transcription, DNA-templated);GO:0006357(regulation…				MYB	PREDICTED: transcription factor MYB36-like [Pyrus x bretschneideri]	mrna	0	0.294819	0.156501	0	0	0	1504.4	10.555	0.00941126	0.0165011	up	yes
EVM0015323	EVM0015323		EVM0015323.1	GO:0000981(RNA polymerase II transcription factor activity, sequence-specific DNA binding);GO:0001135(transcription factor activity, RNA polymerase II transcription factor recruiting);GO:0003677(DNA binding);GO:0003700(DNA binding transcription factor activity);GO:0005634(nucleus);GO:0006351(transcription, DNA-templated);GO:0006355(regulation of transcription, DNA-templated);GO:0006357(regulation…				MYB	PREDICTED: transcription factor MYB39-like [Pyrus x bretschneideri]	mrna	0.18327	0.446466	0.518547	0.053351	0.171955	0	5.09655	2.34952	0.017023	0.0284664	up	yes
EVM0009838	EVM0009838		EVM0009838.1	GO:0000902(cell morphogenesis);GO:0000981(RNA polymerase II transcription factor activity, sequence-specific DNA binding);GO:0001135(transcription factor activity, RNA polymerase II transcription factor recruiting);GO:0003677(DNA binding);GO:0003700(DNA binding transcription factor activity);GO:0005634(nucleus);GO:0006351(transcription, DNA-templated);GO:0006355(regulation of transcription, DNA-t…				MYB	PREDICTED: transcription factor MYB80-like [Pyrus x bretschneideri]	mrna	0.240964	0	0	1.75405	1.63512	2.61832	0.0401105	-4.63987	0.021648	0.0354949	down	yes
EVM0007473	EVM0007473		EVM0007473.1	GO:0000981(RNA polymerase II transcription factor activity, sequence-specific DNA binding);GO:0001135(transcription factor activity, RNA polymerase II transcription factor recruiting);GO:0003700(DNA binding transcription factor activity);GO:0005634(nucleus);GO:0006355(regulation of transcription, DNA-templated);GO:0006357(regulation of transcription by RNA polymerase II);GO:0030154(cell different…				MYB	PREDICTED: protein ODORANT1-like [Pyrus x bretschneideri]	mrna	0.282971	0.378924	0.432005	0.057646	0.059986	0.199479	3.44958	1.78642	0.0300266	0.0480264	up	yes
EVM0020360	EVM0020360		EVM0020360.1	GO:0003677(DNA binding);GO:0003700(DNA binding transcription factor activity);GO:0005634(nucleus);GO:0006351(transcription, DNA-templated);GO:0006355(regulation of transcription, DNA-templated);GO:0007623(circadian rhythm);GO:0009409(response to cold);GO:0009651(response to salt stress);GO:0009723(response to ethylene);GO:0009733(response to auxin);GO:0009737(response to abscisic acid);GO:0009739…	04712(Circadian rhythm - plant)	K12133		MYB-related	PREDICTED: protein LHY-like isoform X2 [Pyrus x bretschneideri]	mrna	7.48802	7.98816	7.40988	56.0797	56.0784	53.1616	0.138435	-2.85272	1.0498e-259	4.9524e-257	down	yes
EVM0036356	EVM0036356		EVM0036356.1	GO:0009723(response to ethylene)				MYB-related	PREDICTED: uncharacterized protein LOC103944815 [Pyrus x bretschneideri]	mrna	82.3861	83.7153	85.8672	15.1417	16.1585	14.014	5.56049	2.47521	7.3798e-180	1.8838e-177	up	yes
EVM0026359	EVM0026359		EVM0026359.1	GO:0003677(DNA binding);GO:0003700(DNA binding transcription factor activity);GO:0005634(nucleus);GO:0006351(transcription, DNA-templated);GO:0006355(regulation of transcription, DNA-templated);GO:0007623(circadian rhythm);GO:0009409(response to cold);GO:0009651(response to salt stress);GO:0009723(response to ethylene);GO:0009733(response to auxin);GO:0009737(response to abscisic acid);GO:0009739…	04712(Circadian rhythm - plant)	K12133		MYB-related	PREDICTED: protein LHY-like isoform X2 [Pyrus x bretschneideri]	mrna	6.77367	8.67743	7.20832	55.2217	56.7401	49.2232	0.14058	-2.83053	4.7084e-122	5.2696e-120	down	yes
EVM0000634	EVM0000634		EVM0000634.1	GO:0003677(DNA binding);GO:0003700(DNA binding transcription factor activity);GO:0005634(nucleus);GO:0006351(transcription, DNA-templated);GO:0006355(regulation of transcription, DNA-templated)				MYB-related	PREDICTED: transcription factor DIVARICATA [Pyrus x bretschneideri]	mrna	107.037	84.2486	104.845	7.25153	11.0439	13.0811	9.43798	3.23848	1.91986e-70	7.56357e-69	up	yes
EVM0013443	EVM0013443		EVM0013443.1	GO:0009908(flower development);GO:0048262(determination of dorsal/ventral asymmetry)				MYB-related	PREDICTED: transcription factor DIVARICATA-like [Pyrus x bretschneideri]	mrna	6.45677	4.84179	4.94142	26.5674	24.2975	22.9934	0.21988	-2.18521	1.0519e-50	2.45174e-49	down	yes
EVM0042427	EVM0042427		EVM0042427.1	GO:0003682(chromatin binding);GO:0003700(DNA binding transcription factor activity);GO:0003713(transcription coactivator activity);GO:0004402(histone acetyltransferase activity);GO:0005634(nucleus);GO:0006338(chromatin remodeling);GO:0006357(regulation of transcription by RNA polymerase II);GO:0035066(positive regulation of histone acetylation)				MYB-related	PREDICTED: transcription factor MYB1R1 [Pyrus x bretschneideri]	mrna	120.653	156.008	155.51	51.762	52.8682	54.5467	2.71503	1.44097	7.53263e-41	1.3009e-39	up	yes
EVM0030171	EVM0030171		EVM0030171.1	GO:0003677(DNA binding);GO:0003700(DNA binding transcription factor activity);GO:0005634(nucleus);GO:0006351(transcription, DNA-templated);GO:0006355(regulation of transcription, DNA-templated);GO:0009651(response to salt stress);GO:0009723(response to ethylene);GO:0009733(response to auxin);GO:0009737(response to abscisic acid);GO:0009739(response to gibberellin);GO:0009751(response to salicylic…	04712(Circadian rhythm - plant)	K12133		MYB-related	PREDICTED: protein REVEILLE 8-like isoform X1 [Malus domestica]	mrna	8.09235	7.33168	6.38567	26.7216	28.4103	27.4605	0.264064	-1.92104	2.51488e-40	4.27002e-39	down	yes
EVM0013643	EVM0013643		EVM0013643.1	GO:0003677(DNA binding);GO:0003700(DNA binding transcription factor activity);GO:0005634(nucleus);GO:0006351(transcription, DNA-templated);GO:0006355(regulation of transcription, DNA-templated);GO:0009651(response to salt stress);GO:0009723(response to ethylene);GO:0009733(response to auxin);GO:0009737(response to abscisic acid);GO:0009739(response to gibberellin);GO:0009751(response to salicylic…	04712(Circadian rhythm - plant)	K12133		MYB-related	PREDICTED: protein REVEILLE 3 [Pyrus x bretschneideri]	mrna	15.2439	17.047	17.0639	7.55408	7.33155	6.49632	2.30825	1.2068	7.44278e-32	9.45094e-31	up	yes
EVM0030995	EVM0030995		EVM0030995.1	GO:0003677(DNA binding);GO:0003700(DNA binding transcription factor activity);GO:0005634(nucleus);GO:0006351(transcription, DNA-templated);GO:0006355(regulation of transcription, DNA-templated);GO:0009651(response to salt stress);GO:0009723(response to ethylene);GO:0009733(response to auxin);GO:0009737(response to abscisic acid);GO:0009739(response to gibberellin);GO:0009751(response to salicylic…	04712(Circadian rhythm - plant)	K12133		MYB-related	PREDICTED: protein REVEILLE 8 isoform X1 [Pyrus x bretschneideri]	mrna	3.84798	3.43773	4.87834	17.9046	19.1621	17.8434	0.221527	-2.17444	8.23036e-31	1.00241e-29	down	yes
EVM0033558	EVM0033558		EVM0033558.1	GO:0003677(DNA binding);GO:0003700(DNA binding transcription factor activity);GO:0005634(nucleus);GO:0006351(transcription, DNA-templated);GO:0006355(regulation of transcription, DNA-templated);GO:0009630(gravitropism);GO:0009793(embryo development ending in seed dormancy);GO:0010114(response to red light)				MYB-related	PREDICTED: protein RADIALIS-like 1 [Pyrus x bretschneideri]	mrna	5.54037	5.42845	11.5431	67.8045	73.8235	69.4926	0.106631	-3.22931	2.6672e-30	3.18194e-29	down	yes
EVM0029147	EVM0029147		EVM0029147.1	GO:0003677(DNA binding);GO:0003700(DNA binding transcription factor activity);GO:0005634(nucleus);GO:0006351(transcription, DNA-templated);GO:0006355(regulation of transcription, DNA-templated);GO:0007623(circadian rhythm);GO:0009651(response to salt stress);GO:0009723(response to ethylene);GO:0046686(response to cadmium ion)	04712(Circadian rhythm - plant)	K12133		MYB-related	protein REVEILLE 7-like [Pyrus x bretschneideri]	mrna	16.9638	22.0297	33.9805	4.44409	4.82891	5.2467	5.02586	2.32937	1.06911e-27	1.14496e-26	up	yes
EVM0013971	EVM0013971		EVM0013971.1	GO:0000981(RNA polymerase II transcription factor activity, sequence-specific DNA binding);GO:0001135(transcription factor activity, RNA polymerase II transcription factor recruiting);GO:0003677(DNA binding);GO:0003700(DNA binding transcription factor activity);GO:0005515(protein binding);GO:0005634(nucleus);GO:0006351(transcription, DNA-templated);GO:0006355(regulation of transcription, DNA-temp…				MYB-related	hypothetical protein DVH24_007018 [Malus domestica]	mrna	0.663925	0.378913	0.327851	8.52005	7.19177	9.8579	0.0536059	-4.22146	1.31415e-27	1.40255e-26	down	yes
EVM0012139	EVM0012139		EVM0012139.1	GO:0003677(DNA binding);GO:0005634(nucleus)				MYB-related	PREDICTED: uncharacterized protein LOC103947152 [Pyrus x bretschneideri]	mrna	5.40716	6.95426	7.42526	2.03834	1.91862	1.55682	3.58859	1.84342	3.4772e-27	3.64637e-26	up	yes
EVM0030414	EVM0030414		EVM0030414.1	GO:0009723(response to ethylene)				MYB-related	PREDICTED: transcription factor MYB1R1-like [Pyrus x bretschneideri]	mrna	36.847	35.9223	37.0031	15.3345	19.0641	15.5059	2.19965	1.13727	5.09516e-27	5.30571e-26	up	yes
EVM0000190	EVM0000190		EVM0000190.1	GO:0003677(DNA binding);GO:0005634(nucleus)	00270(Cysteine and methionine metabolism)	K01251	EC:3.3.1.1	MYB-related	hypothetical protein DVH24_006730 [Malus domestica]	mrna	23.6318	26.8935	29.0603	13.2473	13.1618	11.653	2.09094	1.06415	1.44979e-26	1.47912e-25	up	yes
EVM0022891	EVM0022891		EVM0022891.1	GO:0003677(DNA binding);GO:0005515(protein binding);GO:0005634(nucleus);GO:0006351(transcription, DNA-templated);GO:0007049(cell cycle);GO:0017053(transcriptional repressor complex)				MYB-related	PREDICTED: protein ALWAYS EARLY 2-like isoform X1 [Pyrus x bretschneideri]	mrna	21.5303	22.6063	23.3403	10.9818	12.2331	8.88881	2.10184	1.07165	4.26548e-23	3.70301e-22	up	yes
EVM0036969	EVM0036969		EVM0036969.1	GO:0000981(RNA polymerase II transcription factor activity, sequence-specific DNA binding);GO:0001135(transcription factor activity, RNA polymerase II transcription factor recruiting);GO:0003677(DNA binding);GO:0003700(DNA binding transcription factor activity);GO:0005515(protein binding);GO:0005634(nucleus);GO:0006351(transcription, DNA-templated);GO:0006355(regulation of transcription, DNA-temp…				MYB-related	PREDICTED: MYB-like transcription factor ETC1 [Pyrus x bretschneideri]	mrna	14.0057	13.1893	11.6086	41.3306	43.7949	46.8765	0.293962	-1.7663	6.42147e-20	4.78548e-19	down	yes
EVM0006805	EVM0006805		EVM0006805.1	GO:0000784(nuclear chromosome, telomeric region);GO:0003691(double-stranded telomeric DNA binding);GO:0031627(telomeric loop formation)				MYB-related	PREDICTED: single myb histone 4-like isoform X1 [Pyrus x bretschneideri]	mrna	8.6681	9.1321	9.76544	4.26319	4.77391	4.29807	2.06714	1.04763	3.88868e-18	2.62264e-17	up	yes
EVM0006350	EVM0006350		EVM0006350.1	GO:0009723(response to ethylene)				MYB-related	MYBR domain class transcription factor [Malus domestica]	mrna	101.129	118.826	116.027	44.4694	65.3883	52.4013	2.07065	1.05009	1.36125e-17	8.87861e-17	up	yes
EVM0010565	EVM0010565		EVM0010565.1	GO:0003677(DNA binding);GO:0003700(DNA binding transcription factor activity);GO:0005634(nucleus);GO:0006351(transcription, DNA-templated);GO:0006355(regulation of transcription, DNA-templated);GO:0009651(response to salt stress);GO:0009723(response to ethylene);GO:0009733(response to auxin);GO:0009737(response to abscisic acid);GO:0009739(response to gibberellin);GO:0009751(response to salicylic…	04712(Circadian rhythm - plant)	K12133		MYB-related	PREDICTED: protein REVEILLE 3-like isoform X1 [Pyrus x bretschneideri]	mrna	4.19844	4.92964	4.82304	1.50793	1.92922	1.43712	2.8622	1.51712	3.38394e-17	2.15841e-16	up	yes
EVM0010128	EVM0010128		EVM0010128.1	GO:0003677(DNA binding);GO:0003700(DNA binding transcription factor activity);GO:0005634(nucleus);GO:0005783(endoplasmic reticulum);GO:0005886(plasma membrane);GO:0048767(root hair elongation)				MYB-related	PREDICTED: dnaJ homolog subfamily C member 2-like [Pyrus x bretschneideri]	mrna	10.3191	10.4967	9.07984	21.7703	19.7446	21.6918	0.472982	-1.08014	4.72543e-16	2.82412e-15	down	yes
EVM0033165	EVM0033165		EVM0033165.1	GO:0000784(nuclear chromosome, telomeric region);GO:0003691(double-stranded telomeric DNA binding);GO:0031627(telomeric loop formation)				MYB-related	PREDICTED: telomere repeat-binding factor 1 isoform X2 [Pyrus x bretschneideri]	mrna	8.05404	7.38919	9.88243	21.8458	20.5028	23.0732	0.387113	-1.36917	4.88578e-15	2.74188e-14	down	yes
EVM0027318	EVM0027318		EVM0027318.1	GO:0000981(RNA polymerase II transcription factor activity, sequence-specific DNA binding);GO:0001135(transcription factor activity, RNA polymerase II transcription factor recruiting);GO:0003677(DNA binding);GO:0003700(DNA binding transcription factor activity);GO:0005515(protein binding);GO:0005634(nucleus);GO:0006351(transcription, DNA-templated);GO:0006355(regulation of transcription, DNA-temp…				MYB-related	PREDICTED: transcription factor CPC-like [Malus domestica]	mrna	2.2849	3.43249	1.34816	11.9658	13.7652	13.0073	0.182392	-2.45489	8.79784e-15	4.85758e-14	down	yes
EVM0021998	EVM0021998		EVM0021998.1	GO:0000981(RNA polymerase II transcription factor activity, sequence-specific DNA binding);GO:0001135(transcription factor activity, RNA polymerase II transcription factor recruiting);GO:0003677(DNA binding);GO:0003700(DNA binding transcription factor activity);GO:0005634(nucleus);GO:0006351(transcription, DNA-templated);GO:0006355(regulation of transcription, DNA-templated);GO:0006357(regulation…				MYB-related	PREDICTED: snRNA-activating protein complex subunit 4-like [Pyrus x bretschneideri]	mrna	1.51519	1.32586	2.7272	0	0	0	18560.8	14.18	3.60661e-14	1.90686e-13	up	yes
EVM0033999	EVM0033999		EVM0033999.1	GO:0003682(chromatin binding);GO:0003700(DNA binding transcription factor activity);GO:0003713(transcription coactivator activity);GO:0004402(histone acetyltransferase activity);GO:0005634(nucleus);GO:0006338(chromatin remodeling);GO:0006357(regulation of transcription by RNA polymerase II);GO:0035066(positive regulation of histone acetylation)				MYB-related	PREDICTED: transcription factor MYB1R1 [Pyrus x bretschneideri]	mrna	20.9661	25.1363	33.9703	10.8451	15.1268	10.3446	2.20486	1.14069	1.3564e-10	5.5314e-10	up	yes
EVM0042100	EVM0042100		EVM0042100.1	GO:0003677(DNA binding);GO:0003700(DNA binding transcription factor activity);GO:0005634(nucleus);GO:0006351(transcription, DNA-templated);GO:0006355(regulation of transcription, DNA-templated)				MYB-related	PREDICTED: protein RADIALIS-like 3 [Pyrus x bretschneideri]	mrna	0.881909	0.351314	0.794632	6.05994	5.77398	6.97469	0.107815	-3.21337	1.47993e-10	6.01478e-10	down	yes
EVM0013031	EVM0013031		EVM0013031.1	GO:0003677(DNA binding);GO:0003700(DNA binding transcription factor activity);GO:0005634(nucleus);GO:0006351(transcription, DNA-templated);GO:0006355(regulation of transcription, DNA-templated)				MYB-related	PREDICTED: transcription factor DIVARICATA-like [Pyrus x bretschneideri]	mrna	0.655271	0.739788	0.612386	2.48223	3.00093	2.56114	0.249549	-2.0026	5.6602e-08	1.83627e-07	down	yes
EVM0031097	EVM0031097		EVM0031097.1	GO:0003682(chromatin binding);GO:0003700(DNA binding transcription factor activity);GO:0003713(transcription coactivator activity);GO:0004402(histone acetyltransferase activity);GO:0005634(nucleus);GO:0006338(chromatin remodeling);GO:0006357(regulation of transcription by RNA polymerase II);GO:0035066(positive regulation of histone acetylation)				MYB-related	PREDICTED: myb-like protein J [Pyrus x bretschneideri]	mrna	11.6129	7.18886	8.18324	5.09648	4.02497	3.90485	2.07158	1.05073	2.08159e-07	6.42422e-07	up	yes
EVM0000679	EVM0000679		EVM0000679.1	GO:0000981(RNA polymerase II transcription factor activity, sequence-specific DNA binding);GO:0001135(transcription factor activity, RNA polymerase II transcription factor recruiting);GO:0003677(DNA binding);GO:0003700(DNA binding transcription factor activity);GO:0005515(protein binding);GO:0005634(nucleus);GO:0006351(transcription, DNA-templated);GO:0006355(regulation of transcription, DNA-temp…				MYB-related	PREDICTED: transcription factor CPC-like [Malus domestica]	mrna	3.16103	2.76415	3.60161	7.7607	7.56835	7.26873	0.421581	-1.24612	2.30999e-07	7.09443e-07	down	yes
EVM0031562	EVM0031562		EVM0031562.1	GO:0000981(RNA polymerase II transcription factor activity, sequence-specific DNA binding);GO:0001135(transcription factor activity, RNA polymerase II transcription factor recruiting);GO:0003677(DNA binding);GO:0003700(DNA binding transcription factor activity);GO:0005634(nucleus);GO:0006351(transcription, DNA-templated);GO:0006355(regulation of transcription, DNA-templated);GO:0006357(regulation…				MYB-related	PREDICTED: MYB-like transcription factor ETC1 [Pyrus x bretschneideri]	mrna	1.40444	0.904849	0.680408	5.02526	3.38089	7.41011	0.189027	-2.40334	3.69081e-07	1.11191e-06	down	yes
EVM0018077	EVM0018077		EVM0018077.1	GO:0000981(RNA polymerase II transcription factor activity, sequence-specific DNA binding);GO:0001135(transcription factor activity, RNA polymerase II transcription factor recruiting);GO:0003677(DNA binding);GO:0003700(DNA binding transcription factor activity);GO:0005634(nucleus);GO:0006351(transcription, DNA-templated);GO:0006355(regulation of transcription, DNA-templated);GO:0006357(regulation…				MYB-related	PREDICTED: myb-related protein 305-like [Pyrus x bretschneideri]	mrna	0.992519	0.159435	0.821055	0	0	0	6576.7	12.6831	5.22628e-06	1.40685e-05	up	yes
EVM0004114	EVM0004114		EVM0004114.1	GO:0003677(DNA binding);GO:0003700(DNA binding transcription factor activity);GO:0005634(nucleus);GO:0006351(transcription, DNA-templated);GO:0006355(regulation of transcription, DNA-templated);GO:0008270(zinc ion binding)				MYB-related	PREDICTED: myb-like protein J [Pyrus x bretschneideri]	mrna	0	0.17507	0	6.04028	6.07143	8.93661	0.00831753	-6.90963	0.00016661	0.000377013	down	yes
EVM0040948	EVM0040948		EVM0040948.1	GO:0003677(DNA binding);GO:0003700(DNA binding transcription factor activity);GO:0005634(nucleus);GO:0006351(transcription, DNA-templated);GO:0006355(regulation of transcription, DNA-templated)				MYB-related	PREDICTED: protein RADIALIS-like 3 [Pyrus x bretschneideri]	mrna	1.20986	0.876229	1.30316	5.51512	3.71449	3.65943	0.262956	-1.92711	0.000190434	0.000427986	down	yes
EVM0030274	EVM0030274		EVM0030274.1	GO:0003777(microtubule motor activity);GO:0005871(kinesin complex);GO:0007018(microtubule-based movement);GO:0016887(ATPase activity)				MYB-related	PREDICTED: uncharacterized protein LOC103955247 [Pyrus x bretschneideri]	mrna	0.740996	0.245944	0.542236	1.19933	1.35836	1.37777	0.388564	-1.36377	0.000541905	0.00114869	down	yes
EVM0007848	EVM0007848		EVM0007848.1	GO:0003677(DNA binding);GO:0003700(DNA binding transcription factor activity);GO:0005634(nucleus);GO:0006351(transcription, DNA-templated);GO:0006355(regulation of transcription, DNA-templated);GO:0007623(circadian rhythm);GO:0009651(response to salt stress);GO:0009723(response to ethylene);GO:0046686(response to cadmium ion)	04712(Circadian rhythm - plant)	K12133		MYB-related	PREDICTED: protein REVEILLE 7-like [Malus domestica]	mrna	1.10099	1.23491	0.607384	1.96568	2.09041	2.14917	0.474321	-1.07607	0.00554267	0.0101265	down	yes
EVM0026777	EVM0026777		EVM0026777.1	GO:0003677(DNA binding);GO:0003700(DNA binding transcription factor activity);GO:0005634(nucleus);GO:0006351(transcription, DNA-templated);GO:0006355(regulation of transcription, DNA-templated)				MYB-related	PREDICTED: protein RADIALIS-like 4 [Pyrus x bretschneideri]	mrna	0.126838	0.631853	0.371782	2.92862	1.19367	1.81434	0.190424	-2.39271	0.00860641	0.0152102	down	yes
EVM0010717	EVM0010717		EVM0010717.1	GO:0003677(DNA binding);GO:0003700(DNA binding transcription factor activity);GO:0005634(nucleus);GO:0006355(regulation of transcription, DNA-templated)				MYB-related	PREDICTED: protein RADIALIS-like 3 [Malus domestica]	mrna	0.630623	1.18445	2.57354	0.295462	0.242524	0.391065	4.72375	2.23993	0.00883793	0.0155905	up	yes
EVM0018587	EVM0018587		EVM0018587.1	GO:0000981(RNA polymerase II transcription factor activity, sequence-specific DNA binding);GO:0001135(transcription factor activity, RNA polymerase II transcription factor recruiting);GO:0003677(DNA binding);GO:0003700(DNA binding transcription factor activity);GO:0005634(nucleus);GO:0006351(transcription, DNA-templated);GO:0006355(regulation of transcription, DNA-templated);GO:0006357(regulation…				MYB-related	PREDICTED: transcription factor MYB35 [Pyrus x bretschneideri]	mrna	0.136594	0.035471	0.104595	0.419581	0.332976	0.514312	0.218381	-2.19508	0.0172411	0.0287923	down	yes
EVM0013363	EVM0013363		EVM0013363.1	GO:0000981(RNA polymerase II transcription factor activity, sequence-specific DNA binding);GO:0001135(transcription factor activity, RNA polymerase II transcription factor recruiting);GO:0003677(DNA binding);GO:0003700(DNA binding transcription factor activity);GO:0005515(protein binding);GO:0005634(nucleus);GO:0006351(transcription, DNA-templated);GO:0006355(regulation of transcription, DNA-temp…				MYB-related	hypothetical protein DVH24_022448 [Malus domestica]	mrna	0	0	0	0.85858	0	0.549357	0.000213078	-12.1963	0.0241808	0.0393004	down	yes
EVM0000832	EVM0000832		EVM0000832.1	GO:0003677(DNA binding);GO:0003700(DNA binding transcription factor activity);GO:0005634(nucleus);GO:0006351(transcription, DNA-templated);GO:0006355(regulation of transcription, DNA-templated);GO:0007275(multicellular organism development);GO:0009793(embryo development ending in seed dormancy);GO:0009825(multidimensional cell growth);GO:0009835(fruit ripening);GO:0009908(flower development);GO:0…	03013(RNA transport);03015(mRNA surveillance pathway);03018(RNA degradation)	K13126		NAC	hypothetical protein DVH24_007203 [Malus domestica]	mrna	108.093	152.262	127.57	1.46802	2.18544	2.97024	58.5661	5.87199	2.4618e-196	7.2817e-194	up	yes
EVM0023056	EVM0023056		EVM0023056.1	GO:0003677(DNA binding);GO:0003700(DNA binding transcription factor activity);GO:0005634(nucleus);GO:0005789(endoplasmic reticulum membrane);GO:0006351(transcription, DNA-templated);GO:0006355(regulation of transcription, DNA-templated);GO:0007275(multicellular organism development);GO:0016021(integral component of membrane);GO:0070301(cellular response to hydrogen peroxide)	03013(RNA transport);03015(mRNA surveillance pathway);03018(RNA degradation)	K13126		NAC	PREDICTED: NAC domain-containing protein 17-like [Malus domestica]	mrna	75.252	76.6376	78.5477	16.9241	17.4781	18.2869	4.37353	2.1288	4.2695e-174	1.0333e-171	up	yes
EVM0020187	EVM0020187		EVM0020187.1	GO:0003677(DNA binding);GO:0003700(DNA binding transcription factor activity);GO:0005634(nucleus);GO:0006351(transcription, DNA-templated);GO:0006355(regulation of transcription, DNA-templated);GO:0007275(multicellular organism development);GO:0009611(response to wounding);GO:0009788(negative regulation of abscisic acid-activated signaling pathway)				NAC	PREDICTED: NAC domain-containing protein 2 [Pyrus x bretschneideri]	mrna	1016.24	1010.11	1102.82	69.1463	110.729	82.4661	11.9279	3.57626	3.852e-143	6.109e-141	up	yes
EVM0017487	EVM0017487		EVM0017487.1	GO:0003677(DNA binding);GO:0005515(protein binding);GO:0005634(nucleus);GO:0006351(transcription, DNA-templated);GO:0007275(multicellular organism development);GO:0008361(regulation of cell size);GO:0009416(response to light stimulus);GO:0009611(response to wounding);GO:0009620(response to fungus);GO:0009744(response to sucrose);GO:0009751(response to salicylic acid);GO:0009753(response to jasmon…				NAC	PREDICTED: NAC domain-containing protein 2-like [Pyrus x bretschneideri]	mrna	1017.32	833.514	842.859	103.18	143.26	128.733	7.17989	2.84396	3.3648e-121	3.7102e-119	up	yes
EVM0042383	EVM0042383		EVM0042383.1	GO:0003677(DNA binding);GO:0003700(DNA binding transcription factor activity);GO:0005634(nucleus);GO:0006351(transcription, DNA-templated);GO:0006355(regulation of transcription, DNA-templated);GO:0007275(multicellular organism development);GO:0009414(response to water deprivation);GO:0009737(response to abscisic acid);GO:0043565(sequence-specific DNA binding);GO:0045893(positive regulation of tr…				NAC	PREDICTED: LOW QUALITY PROTEIN: NAC domain-containing protein 72 [Pyrus x bretschneideri]	mrna	78.709	123.278	131.555	5.01383	7.2362	5.92617	18.3505	4.19775	3.0709e-111	2.7847e-109	up	yes
EVM0030019	EVM0030019		EVM0030019.1	GO:0003677(DNA binding);GO:0003700(DNA binding transcription factor activity);GO:0005634(nucleus);GO:0005737(cytoplasm);GO:0006351(transcription, DNA-templated);GO:0006355(regulation of transcription, DNA-templated);GO:0007275(multicellular organism development)	03013(RNA transport);03015(mRNA surveillance pathway);03018(RNA degradation)	K13126		NAC	PREDICTED: NAC domain-containing protein 79-like [Pyrus x bretschneideri]	mrna	11.3577	11.0033	13.2434	0.988634	0.744841	0.673878	14.7899	3.88654	7.7487e-106	6.333e-104	up	yes
EVM0027909	EVM0027909		EVM0027909.1					NAC	PREDICTED: NAC domain-containing protein 79-like isoform X3 [Pyrus x bretschneideri]	mrna	27.9091	20.6001	24.9892	3.46516	3.35143	4.16595	6.69229	2.7425	1.33558e-67	4.87996e-66	up	yes
EVM0026594	EVM0026594		EVM0026594.1	GO:0003677(DNA binding);GO:0005515(protein binding);GO:0005634(nucleus);GO:0006351(transcription, DNA-templated);GO:0007275(multicellular organism development);GO:0008361(regulation of cell size);GO:0009416(response to light stimulus);GO:0009611(response to wounding);GO:0009620(response to fungus);GO:0009744(response to sucrose);GO:0009751(response to salicylic acid);GO:0009753(response to jasmon…				NAC	NAC domain protein [Malus hupehensis]	mrna	76.2205	53.0531	45.7953	3.70737	5.61682	6.49445	11.0673	3.46823	1.6575e-64	5.62087e-63	up	yes
EVM0005403	EVM0005403		EVM0005403.1	GO:0003677(DNA binding);GO:0003700(DNA binding transcription factor activity);GO:0005634(nucleus);GO:0006351(transcription, DNA-templated);GO:0006355(regulation of transcription, DNA-templated);GO:0007275(multicellular organism development);GO:0009793(embryo development ending in seed dormancy);GO:0009825(multidimensional cell growth);GO:0009835(fruit ripening);GO:0009908(flower development);GO:0…	03013(RNA transport);03015(mRNA surveillance pathway);03018(RNA degradation)	K13126		NAC	NAC transcription factor 29-like [Malus domestica]	mrna	8.24861	11.9887	7.63101	0.097744	0.157644	0.055313	89.6949	6.48695	8.68636e-60	2.62131e-58	up	yes
EVM0005884	EVM0005884		EVM0005884.1	GO:0003677(DNA binding);GO:0003700(DNA binding transcription factor activity);GO:0005634(nucleus);GO:0006351(transcription, DNA-templated);GO:0006355(regulation of transcription, DNA-templated);GO:0007275(multicellular organism development);GO:0016021(integral component of membrane)				NAC	hypothetical protein DVH24_005345 [Malus domestica]	mrna	22.6182	25.9184	23.6803	6.73405	7.53735	5.94519	3.57216	1.8368	2.41551e-59	7.1904e-58	up	yes
[truncated: 356 more rows]
