# Supplementary material
Source: Research Square preprint supplement (doi:10.21203/rs.3.rs-9020477/v1)
Supplement: Supplementary file 3 [file 71153ec177057242bdf74c7b.xlsx]

## Sheet: Sheet 1
GO_Category	GO_ID	GO_Term	IDs	S	TS	B	TB	Rich.Factor	P.value	Sig.Sign.P	Q.value	Sig.Sign.Q	S_Up_ID	S_Up_Num	S_Down_ID	S_Down_Num	MapID_Count	ZScore
Biological Process	GO:0006952	defense response	EVM0022643|EVM0022643, EVM0030201|EVM0030201, EVM0036678|EVM0036678, EVM0000839|EVM0000839, EVM0031460|EVM0031460, EVM0027793|EVM0027793, EVM0018812|EVM0018812, EVM0037464|EVM0037464, EVM0017261|EVM0017261, EVM0035427|EVM0035427, EVM0023307|EVM0023307, EVM0035041|EVM0035041, EVM0039883|EVM0039883, EVM0024100|EVM0024100, EVM0042504|EVM0042504, EVM0034637|EVM0034637, EVM0001372|EVM0001372, EVM00158…	492	12016	1100	37732	0.4473	8.67285e-20	****	1.86249e-16	****	EVM0022643|EVM0022643, EVM0036678|EVM0036678, EVM0000839|EVM0000839, EVM0031460|EVM0031460, EVM0027793|EVM0027793, EVM0018812|EVM0018812, EVM0037464|EVM0037464, EVM0017261|EVM0017261, EVM0035427|EVM0035427, EVM0023307|EVM0023307, EVM0035041|EVM0035041, EVM0039883|EVM0039883, EVM0024100|EVM0024100, EVM0034637|EVM0034637, EVM0001372|EVM0001372, EVM0016392|EVM0016392, EVM0035543|EVM0035543, EVM00253…	338	EVM0030201|EVM0030201, EVM0042504|EVM0042504, EVM0015862|EVM0015862, EVM0037005|EVM0037005, EVM0004525|EVM0004525, EVM0022338|EVM0022338, EVM0008228|EVM0008228, EVM0040656|EVM0040656, EVM0001661|EVM0001661, EVM0017773|EVM0017773, EVM0029148|EVM0029148, EVM0032701|EVM0032701, EVM0012825|EVM0012825, EVM0027781|EVM0027781, EVM0005539|EVM0005539, EVM0002882|EVM0002882, EVM0017225|EVM0017225, EVM00020…	154	1050	7.49914
	GO:0006468	protein phosphorylation	EVM0036527|EVM0036527, EVM0031460|EVM0031460, EVM0000459|EVM0000459, EVM0011682|EVM0011682, EVM0000991|EVM0000991, EVM0034736|EVM0034736, EVM0035543|EVM0035543, EVM0033886|EVM0033886, EVM0009095|EVM0009095, EVM0028071|EVM0028071, EVM0030559|EVM0030559, EVM0017767|EVM0017767, EVM0027878|EVM0027878, EVM0026444|EVM0026444, EVM0019423|EVM0019423, EVM0025652|EVM0025652, EVM0016652|EVM0016652, EVM00123…	564	12016	1307	37732	0.4315	1.84483e-18	****	1.98089e-15	****	EVM0036527|EVM0036527, EVM0031460|EVM0031460, EVM0000991|EVM0000991, EVM0034736|EVM0034736, EVM0035543|EVM0035543, EVM0033886|EVM0033886, EVM0017767|EVM0017767, EVM0027878|EVM0027878, EVM0026444|EVM0026444, EVM0019423|EVM0019423, EVM0025652|EVM0025652, EVM0016652|EVM0016652, EVM0018652|EVM0018652, EVM0033100|EVM0033100, EVM0028349|EVM0028349, EVM0011788|EVM0011788, EVM0038383|EVM0038383, EVM00179…	293	EVM0000459|EVM0000459, EVM0011682|EVM0011682, EVM0009095|EVM0009095, EVM0028071|EVM0028071, EVM0030559|EVM0030559, EVM0012350|EVM0012350, EVM0011973|EVM0011973, EVM0035801|EVM0035801, EVM0028465|EVM0028465, EVM0039567|EVM0039567, EVM0026935|EVM0026935, EVM0028571|EVM0028571, EVM0038770|EVM0038770, EVM0007462|EVM0007462, EVM0001468|EVM0001468, EVM0010158|EVM0010158, EVM0007405|EVM0007405, EVM00073…	271	1250	0.622254
	GO:0007165	signal transduction	EVM0022643|EVM0022643, EVM0000839|EVM0000839, EVM0027793|EVM0027793, EVM0018812|EVM0018812, EVM0037464|EVM0037464, EVM0035427|EVM0035427, EVM0028440|EVM0028440, EVM0023307|EVM0023307, EVM0035041|EVM0035041, EVM0039883|EVM0039883, EVM0024100|EVM0024100, EVM0042504|EVM0042504, EVM0034637|EVM0034637, EVM0001372|EVM0001372, EVM0015862|EVM0015862, EVM0008985|EVM0008985, EVM0018128|EVM0018128, EVM00045…	260	12016	582	37732	0.4467	4.77108e-11	****	3.4153e-08	****	EVM0022643|EVM0022643, EVM0000839|EVM0000839, EVM0027793|EVM0027793, EVM0018812|EVM0018812, EVM0037464|EVM0037464, EVM0035427|EVM0035427, EVM0028440|EVM0028440, EVM0023307|EVM0023307, EVM0035041|EVM0035041, EVM0039883|EVM0039883, EVM0024100|EVM0024100, EVM0034637|EVM0034637, EVM0001372|EVM0001372, EVM0008985|EVM0008985, EVM0018128|EVM0018128, EVM0042039|EVM0042039, EVM0007657|EVM0007657, EVM00271…	146	EVM0042504|EVM0042504, EVM0015862|EVM0015862, EVM0004525|EVM0004525, EVM0034668|EVM0034668, EVM0001661|EVM0001661, EVM0018131|EVM0018131, EVM0008078|EVM0008078, EVM0006889|EVM0006889, EVM0007975|EVM0007975, EVM0036938|EVM0036938, EVM0037057|EVM0037057, EVM0036058|EVM0036058, EVM0024531|EVM0024531, EVM0001972|EVM0001972, EVM0029917|EVM0029917, EVM0003340|EVM0003340, EVM0007216|EVM0007216, EVM00402…	114	557	1.65248
	GO:0007169	transmembrane receptor protein tyrosine kinase signaling pathway	EVM0036527|EVM0036527, EVM0000459|EVM0000459, EVM0011682|EVM0011682, EVM0000991|EVM0000991, EVM0035543|EVM0035543, EVM0028071|EVM0028071, EVM0030559|EVM0030559, EVM0011973|EVM0011973, EVM0033100|EVM0033100, EVM0039567|EVM0039567, EVM0026935|EVM0026935, EVM0031425|EVM0031425, EVM0007462|EVM0007462, EVM0001468|EVM0001468, EVM0010158|EVM0010158, EVM0007405|EVM0007405, EVM0007364|EVM0007364, EVM00285…	152	12016	322	37732	0.472	5.82399e-09	****	3.12676e-06	****	EVM0036527|EVM0036527, EVM0000991|EVM0000991, EVM0035543|EVM0035543, EVM0033100|EVM0033100, EVM0031425|EVM0031425, EVM0004592|EVM0004592, EVM0036563|EVM0036563, EVM0012626|EVM0012626, EVM0010413|EVM0010413, EVM0014292|EVM0014292, EVM0000408|EVM0000408, EVM0007340|EVM0007340, EVM0002169|EVM0002169, EVM0042312|EVM0042312, EVM0014060|EVM0014060, EVM0017144|EVM0017144, EVM0012028|EVM0012028, EVM00233…	50	EVM0000459|EVM0000459, EVM0011682|EVM0011682, EVM0028071|EVM0028071, EVM0030559|EVM0030559, EVM0011973|EVM0011973, EVM0039567|EVM0039567, EVM0026935|EVM0026935, EVM0007462|EVM0007462, EVM0001468|EVM0001468, EVM0010158|EVM0010158, EVM0007405|EVM0007405, EVM0007364|EVM0007364, EVM0028505|EVM0028505, EVM0027620|EVM0027620, EVM0032906|EVM0032906, EVM0000258|EVM0000258, EVM0033651|EVM0033651, EVM00098…	102	308	-4.78634
	GO:0009611	response to wounding	EVM0024441|EVM0024441, EVM0020652|EVM0020652, EVM0041556|EVM0041556, EVM0034325|EVM0034325, EVM0020187|EVM0020187, EVM0036893|EVM0036893, EVM0019453|EVM0019453, EVM0017487|EVM0017487, EVM0013794|EVM0013794, EVM0040295|EVM0040295, EVM0002013|EVM0002013, EVM0033100|EVM0033100, EVM0007197|EVM0007197, EVM0016136|EVM0016136, EVM0028990|EVM0028990, EVM0002617|EVM0002617, EVM0024548|EVM0024548, EVM00291…	141	12016	298	37732	0.4732	1.68386e-08	****	8.03575e-06	****	EVM0020652|EVM0020652, EVM0041556|EVM0041556, EVM0034325|EVM0034325, EVM0020187|EVM0020187, EVM0036893|EVM0036893, EVM0019453|EVM0019453, EVM0017487|EVM0017487, EVM0013794|EVM0013794, EVM0040295|EVM0040295, EVM0002013|EVM0002013, EVM0033100|EVM0033100, EVM0007197|EVM0007197, EVM0016136|EVM0016136, EVM0028990|EVM0028990, EVM0002617|EVM0002617, EVM0024548|EVM0024548, EVM0010469|EVM0010469, EVM00272…	100	EVM0024441|EVM0024441, EVM0029148|EVM0029148, EVM0001013|EVM0001013, EVM0019326|EVM0019326, EVM0039385|EVM0039385, EVM0007862|EVM0007862, EVM0026490|EVM0026490, EVM0021011|EVM0021011, EVM0005241|EVM0005241, EVM0012027|EVM0012027, EVM0005525|EVM0005525, EVM0041808|EVM0041808, EVM0023707|EVM0023707, EVM0025866|EVM0025866, EVM0004767|EVM0004767, EVM0000362|EVM0000362, EVM0017196|EVM0017196, EVM00040…	41	283	3.68552
	GO:0051726	regulation of cell cycle	EVM0026968|EVM0026968, EVM0042429|EVM0042429, EVM0031790|EVM0031790, EVM0029111|EVM0029111, EVM0039616|EVM0039616, EVM0007002|EVM0007002, EVM0005112|EVM0005112, EVM0009202|EVM0009202, EVM0007507|EVM0007507, EVM0024806|EVM0024806, EVM0033297|EVM0033297, EVM0001101|EVM0001101, EVM0028008|EVM0028008, EVM0031226|EVM0031226, EVM0009871|EVM0009871, EVM0003114|EVM0003114, EVM0025390|EVM0025390, EVM00031…	52	12016	85	37732	0.6118	2.50067e-08	****	1.07404e-05	****	EVM0027880|EVM0027880, EVM0018041|EVM0018041, EVM0034964|EVM0034964	3	EVM0026968|EVM0026968, EVM0042429|EVM0042429, EVM0031790|EVM0031790, EVM0029111|EVM0029111, EVM0039616|EVM0039616, EVM0007002|EVM0007002, EVM0005112|EVM0005112, EVM0009202|EVM0009202, EVM0007507|EVM0007507, EVM0024806|EVM0024806, EVM0033297|EVM0033297, EVM0001101|EVM0001101, EVM0028008|EVM0028008, EVM0031226|EVM0031226, EVM0009871|EVM0009871, EVM0003114|EVM0003114, EVM0025390|EVM0025390, EVM00031…	49	82	-6.62589
	GO:0009813	flavonoid biosynthetic process	EVM0000510|EVM0000510, EVM0005369|EVM0005369, EVM0014747|EVM0014747, EVM0001281|EVM0001281, EVM0026501|EVM0026501, EVM0026761|EVM0026761, EVM0027447|EVM0027447, EVM0024259|EVM0024259, EVM0041185|EVM0041185, EVM0031130|EVM0031130, EVM0041773|EVM0041773, EVM0035471|EVM0035471, EVM0035517|EVM0035517, EVM0027064|EVM0027064, EVM0006645|EVM0006645, EVM0029816|EVM0029816, EVM0013404|EVM0013404, EVM00064…	118	12016	259	37732	0.4556	2.56266e-06	****	0.000647448	***	EVM0000510|EVM0000510, EVM0005369|EVM0005369, EVM0014747|EVM0014747, EVM0001281|EVM0001281, EVM0026761|EVM0026761, EVM0027447|EVM0027447, EVM0024259|EVM0024259, EVM0041185|EVM0041185, EVM0031130|EVM0031130, EVM0041773|EVM0041773, EVM0035517|EVM0035517, EVM0006645|EVM0006645, EVM0013404|EVM0013404, EVM0006421|EVM0006421, EVM0037018|EVM0037018, EVM0019207|EVM0019207, EVM0029421|EVM0029421, EVM00332…	65	EVM0026501|EVM0026501, EVM0035471|EVM0035471, EVM0027064|EVM0027064, EVM0029816|EVM0029816, EVM0032068|EVM0032068, EVM0035509|EVM0035509, EVM0009892|EVM0009892, EVM0008152|EVM0008152, EVM0020418|EVM0020418, EVM0021098|EVM0021098, EVM0023119|EVM0023119, EVM0005218|EVM0005218, EVM0024748|EVM0024748, EVM0002238|EVM0002238, EVM0034946|EVM0034946, EVM0031812|EVM0031812, EVM0035557|EVM0035557, EVM00271…	53	243	1.09055
	GO:0052696	flavonoid glucuronidation	EVM0000510|EVM0000510, EVM0005369|EVM0005369, EVM0014747|EVM0014747, EVM0001281|EVM0001281, EVM0026501|EVM0026501, EVM0026761|EVM0026761, EVM0027447|EVM0027447, EVM0024259|EVM0024259, EVM0041185|EVM0041185, EVM0031130|EVM0031130, EVM0041773|EVM0041773, EVM0035471|EVM0035471, EVM0035517|EVM0035517, EVM0027064|EVM0027064, EVM0006645|EVM0006645, EVM0029816|EVM0029816, EVM0013404|EVM0013404, EVM00064…	105	12016	226	37732	0.4646	3.00412e-06	****	0.000716817	***	EVM0000510|EVM0000510, EVM0005369|EVM0005369, EVM0014747|EVM0014747, EVM0001281|EVM0001281, EVM0026761|EVM0026761, EVM0027447|EVM0027447, EVM0024259|EVM0024259, EVM0041185|EVM0041185, EVM0031130|EVM0031130, EVM0041773|EVM0041773, EVM0035517|EVM0035517, EVM0006645|EVM0006645, EVM0013404|EVM0013404, EVM0006421|EVM0006421, EVM0037018|EVM0037018, EVM0019207|EVM0019207, EVM0033296|EVM0033296, EVM00086…	60	EVM0026501|EVM0026501, EVM0035471|EVM0035471, EVM0027064|EVM0027064, EVM0029816|EVM0029816, EVM0032068|EVM0032068, EVM0009892|EVM0009892, EVM0008152|EVM0008152, EVM0020418|EVM0020418, EVM0023119|EVM0023119, EVM0005218|EVM0005218, EVM0024748|EVM0024748, EVM0002238|EVM0002238, EVM0034946|EVM0034946, EVM0035557|EVM0035557, EVM0027116|EVM0027116, EVM0010225|EVM0010225, EVM0000742|EVM0000742, EVM00214…	45	210	1.79417
	GO:0044550	secondary metabolite biosynthetic process	EVM0002463|EVM0002463, EVM0029464|EVM0029464, EVM0018097|EVM0018097, EVM0000334|EVM0000334, EVM0022462|EVM0022462, EVM0019254|EVM0019254, EVM0019118|EVM0019118, EVM0025521|EVM0025521, EVM0002673|EVM0002673, EVM0016840|EVM0016840, EVM0020007|EVM0020007, EVM0001230|EVM0001230, EVM0012709|EVM0012709, EVM0013791|EVM0013791, EVM0028436|EVM0028436, EVM0010137|EVM0010137, EVM0036576|EVM0036576, EVM00049…	90	12016	189	37732	0.4762	4.2785e-06	****	0.000967167	***	EVM0002463|EVM0002463, EVM0029464|EVM0029464, EVM0018097|EVM0018097, EVM0000334|EVM0000334, EVM0022462|EVM0022462, EVM0019254|EVM0019254, EVM0019118|EVM0019118, EVM0025521|EVM0025521, EVM0002673|EVM0002673, EVM0016840|EVM0016840, EVM0020007|EVM0020007, EVM0001230|EVM0001230, EVM0010137|EVM0010137, EVM0036576|EVM0036576, EVM0004947|EVM0004947, EVM0004472|EVM0004472, EVM0021659|EVM0021659, EVM00214…	61	EVM0012709|EVM0012709, EVM0013791|EVM0013791, EVM0028436|EVM0028436, EVM0003687|EVM0003687, EVM0028655|EVM0028655, EVM0015222|EVM0015222, EVM0000721|EVM0000721, EVM0032323|EVM0032323, EVM0003757|EVM0003757, EVM0031936|EVM0031936, EVM0003181|EVM0003181, EVM0032401|EVM0032401, EVM0033013|EVM0033013, EVM0017648|EVM0017648, EVM0012953|EVM0012953, EVM0017995|EVM0017995, EVM0037601|EVM0037601, EVM00030…	29	173	2.73703
	GO:0006970	response to osmotic stress	EVM0009973|EVM0009973, EVM0003110|EVM0003110, EVM0038116|EVM0038116, EVM0003709|EVM0003709, EVM0039886|EVM0039886, EVM0041827|EVM0041827, EVM0019475|EVM0019475, EVM0008684|EVM0008684, EVM0015757|EVM0015757, EVM0004779|EVM0004779, EVM0029779|EVM0029779, EVM0040794|EVM0040794, EVM0012987|EVM0012987, EVM0011799|EVM0011799, EVM0027820|EVM0027820, EVM0009812|EVM0009812, EVM0014307|EVM0014307, EVM00377…	79	12016	162	37732	0.4877	5.27799e-06	****	0.0010842	**	EVM0009973|EVM0009973, EVM0003110|EVM0003110, EVM0038116|EVM0038116, EVM0003709|EVM0003709, EVM0039886|EVM0039886, EVM0041827|EVM0041827, EVM0019475|EVM0019475, EVM0008684|EVM0008684, EVM0015757|EVM0015757, EVM0004779|EVM0004779, EVM0029779|EVM0029779, EVM0040794|EVM0040794, EVM0012987|EVM0012987, EVM0011799|EVM0011799, EVM0027820|EVM0027820, EVM0009812|EVM0009812, EVM0014307|EVM0014307, EVM00377…	57	EVM0041853|EVM0041853, EVM0026495|EVM0026495, EVM0040645|EVM0040645, EVM0003986|EVM0003986, EVM0026490|EVM0026490, EVM0038380|EVM0038380, EVM0030468|EVM0030468, EVM0019659|EVM0019659, EVM0036789|EVM0036789, EVM0010748|EVM0010748, EVM0027619|EVM0027619, EVM0009872|EVM0009872, EVM0026904|EVM0026904, EVM0004849|EVM0004849, EVM0010935|EVM0010935, EVM0025672|EVM0025672, EVM0040787|EVM0040787, EVM00069…	22	157	2.87311
	GO:0010200	response to chitin	EVM0036678|EVM0036678, EVM0033184|EVM0033184, EVM0036893|EVM0036893, EVM0027861|EVM0027861, EVM0023683|EVM0023683, EVM0018192|EVM0018192, EVM0032489|EVM0032489, EVM0019475|EVM0019475, EVM0030265|EVM0030265, EVM0029548|EVM0029548, EVM0041215|EVM0041215, EVM0004779|EVM0004779, EVM0001051|EVM0001051, EVM0011799|EVM0011799, EVM0012573|EVM0012573, EVM0036017|EVM0036017, EVM0000128|EVM0000128, EVM00391…	94	12016	200	37732	0.47	5.30107e-06	****	0.0010842	**	EVM0036678|EVM0036678, EVM0033184|EVM0033184, EVM0036893|EVM0036893, EVM0027861|EVM0027861, EVM0023683|EVM0023683, EVM0018192|EVM0018192, EVM0032489|EVM0032489, EVM0019475|EVM0019475, EVM0030265|EVM0030265, EVM0029548|EVM0029548, EVM0041215|EVM0041215, EVM0004779|EVM0004779, EVM0001051|EVM0001051, EVM0011799|EVM0011799, EVM0012573|EVM0012573, EVM0036017|EVM0036017, EVM0000128|EVM0000128, EVM00391…	68	EVM0015239|EVM0015239, EVM0038356|EVM0038356, EVM0012092|EVM0012092, EVM0021263|EVM0021263, EVM0032732|EVM0032732, EVM0005551|EVM0005551, EVM0001852|EVM0001852, EVM0000063|EVM0000063, EVM0036433|EVM0036433, EVM0027848|EVM0027848, EVM0041036|EVM0041036, EVM0014769|EVM0014769, EVM0004047|EVM0004047, EVM0006438|EVM0006438, EVM0006214|EVM0006214, EVM0028845|EVM0028845, EVM0028319|EVM0028319, EVM00405…	26	192	3.60844
	GO:0006749	glutathione metabolic process	EVM0023021|EVM0023021, EVM0002728|EVM0002728, EVM0003194|EVM0003194, EVM0034377|EVM0034377, EVM0017219|EVM0017219, EVM0021015|EVM0021015, EVM0012872|EVM0012872, EVM0017481|EVM0017481, EVM0004157|EVM0004157, EVM0002355|EVM0002355, EVM0016168|EVM0016168, EVM0001965|EVM0001965, EVM0002810|EVM0002810, EVM0012673|EVM0012673, EVM0021001|EVM0021001, EVM0039404|EVM0039404, EVM0014000|EVM0014000, EVM00197…	46	12016	83	37732	0.5542	7.57135e-06	****	0.0014232	**	EVM0023021|EVM0023021, EVM0002728|EVM0002728, EVM0003194|EVM0003194, EVM0034377|EVM0034377, EVM0017219|EVM0017219, EVM0021015|EVM0021015, EVM0017481|EVM0017481, EVM0002355|EVM0002355, EVM0001965|EVM0001965, EVM0002810|EVM0002810, EVM0039404|EVM0039404, EVM0014000|EVM0014000, EVM0032098|EVM0032098, EVM0015872|EVM0015872, EVM0002874|EVM0002874, EVM0010765|EVM0010765, EVM0038271|EVM0038271, EVM00051…	35	EVM0012872|EVM0012872, EVM0004157|EVM0004157, EVM0016168|EVM0016168, EVM0012673|EVM0012673, EVM0021001|EVM0021001, EVM0019704|EVM0019704, EVM0022068|EVM0022068, EVM0039897|EVM0039897, EVM0039141|EVM0039141, EVM0011367|EVM0011367, EVM0008339|EVM0008339	11	81	2.66667
	GO:0009751	response to salicylic acid	EVM0033184|EVM0033184, EVM0020360|EVM0020360, EVM0036893|EVM0036893, EVM0025337|EVM0025337, EVM0005598|EVM0005598, EVM0020288|EVM0020288, EVM0026359|EVM0026359, EVM0017487|EVM0017487, EVM0038520|EVM0038520, EVM0041947|EVM0041947, EVM0032347|EVM0032347, EVM0038025|EVM0038025, EVM0002091|EVM0002091, EVM0035088|EVM0035088, EVM0005967|EVM0005967, EVM0027288|EVM0027288, EVM0026594|EVM0026594, EVM00031…	98	12016	215	37732	0.4558	1.68056e-05	****	0.00288721	**	EVM0033184|EVM0033184, EVM0036893|EVM0036893, EVM0025337|EVM0025337, EVM0005598|EVM0005598, EVM0020288|EVM0020288, EVM0017487|EVM0017487, EVM0038520|EVM0038520, EVM0041947|EVM0041947, EVM0032347|EVM0032347, EVM0038025|EVM0038025, EVM0027288|EVM0027288, EVM0026594|EVM0026594, EVM0003730|EVM0003730, EVM0039785|EVM0039785, EVM0016814|EVM0016814, EVM0020097|EVM0020097, EVM0029048|EVM0029048, EVM00010…	64	EVM0020360|EVM0020360, EVM0026359|EVM0026359, EVM0002091|EVM0002091, EVM0035088|EVM0035088, EVM0005967|EVM0005967, EVM0003183|EVM0003183, EVM0034378|EVM0034378, EVM0030171|EVM0030171, EVM0003640|EVM0003640, EVM0030995|EVM0030995, EVM0040954|EVM0040954, EVM0025269|EVM0025269, EVM0018267|EVM0018267, EVM0005208|EVM0005208, EVM0005765|EVM0005765, EVM0036969|EVM0036969, EVM0033002|EVM0033002, EVM00212…	34	207	2.50217
Cellular Component	GO:0005886	plasma membrane	EVM0036527|EVM0036527, EVM0011823|EVM0011823, EVM0022643|EVM0022643, EVM0033696|EVM0033696, EVM0009973|EVM0009973, EVM0029146|EVM0029146, EVM0021000|EVM0021000, EVM0039578|EVM0039578, EVM0041439|EVM0041439, EVM0034013|EVM0034013, EVM0039308|EVM0039308, EVM0017949|EVM0017949, EVM0036626|EVM0036626, EVM0012889|EVM0012889, EVM0001148|EVM0001148, EVM0011428|EVM0011428, EVM0008275|EVM0008275, EVM00314…	1845	12016	4949	37732	0.3728	1.83662e-18	****	1.98089e-15	****	EVM0036527|EVM0036527, EVM0022643|EVM0022643, EVM0033696|EVM0033696, EVM0009973|EVM0009973, EVM0021000|EVM0021000, EVM0039578|EVM0039578, EVM0034013|EVM0034013, EVM0039308|EVM0039308, EVM0017949|EVM0017949, EVM0036626|EVM0036626, EVM0012889|EVM0012889, EVM0001148|EVM0001148, EVM0011428|EVM0011428, EVM0008275|EVM0008275, EVM0031460|EVM0031460, EVM0025945|EVM0025945, EVM0034601|EVM0034601, EVM00031…	950	EVM0011823|EVM0011823, EVM0029146|EVM0029146, EVM0041439|EVM0041439, EVM0010351|EVM0010351, EVM0000459|EVM0000459, EVM0011682|EVM0011682, EVM0027586|EVM0027586, EVM0021170|EVM0021170, EVM0028071|EVM0028071, EVM0033746|EVM0033746, EVM0041382|EVM0041382, EVM0030559|EVM0030559, EVM0030236|EVM0030236, EVM0024620|EVM0024620, EVM0038269|EVM0038269, EVM0012350|EVM0012350, EVM0021750|EVM0021750, EVM00375…	895	4736	0.14531
	GO:0016021	membrane	EVM0011823|EVM0011823, EVM0041439|EVM0041439, EVM0039308|EVM0039308, EVM0017106|EVM0017106, EVM0000839|EVM0000839, EVM0034601|EVM0034601, EVM0035306|EVM0035306, EVM0033879|EVM0033879, EVM0027793|EVM0027793, EVM0029216|EVM0029216, EVM0033239|EVM0033239, EVM0021803|EVM0021803, EVM0000459|EVM0000459, EVM0011682|EVM0011682, EVM0017866|EVM0017866, EVM0018812|EVM0018812, EVM0023056|EVM0023056, EVM00374…	1763	12016	4943	37732	0.3567	4.69902e-10	****	2.88318e-07	****	EVM0039308|EVM0039308, EVM0017106|EVM0017106, EVM0000839|EVM0000839, EVM0034601|EVM0034601, EVM0027793|EVM0027793, EVM0029216|EVM0029216, EVM0021803|EVM0021803, EVM0017866|EVM0017866, EVM0018812|EVM0018812, EVM0023056|EVM0023056, EVM0037464|EVM0037464, EVM0035427|EVM0035427, EVM0010684|EVM0010684, EVM0023307|EVM0023307, EVM0035041|EVM0035041, EVM0039883|EVM0039883, EVM0009733|EVM0009733, EVM00019…	758	EVM0011823|EVM0011823, EVM0041439|EVM0041439, EVM0035306|EVM0035306, EVM0033879|EVM0033879, EVM0033239|EVM0033239, EVM0000459|EVM0000459, EVM0011682|EVM0011682, EVM0033380|EVM0033380, EVM0027586|EVM0027586, EVM0042504|EVM0042504, EVM0038032|EVM0038032, EVM0015862|EVM0015862, EVM0029682|EVM0029682, EVM0034734|EVM0034734, EVM0028071|EVM0028071, EVM0033746|EVM0033746, EVM0041382|EVM0041382, EVM00305…	1005	4763	-9.24444
	GO:0005576	extracellular region	EVM0021000|EVM0021000, EVM0011473|EVM0011473, EVM0030201|EVM0030201, EVM0003410|EVM0003410, EVM0005951|EVM0005951, EVM0000582|EVM0000582, EVM0029216|EVM0029216, EVM0033239|EVM0033239, EVM0021803|EVM0021803, EVM0027861|EVM0027861, EVM0028042|EVM0028042, EVM0023683|EVM0023683, EVM0004035|EVM0004035, EVM0037005|EVM0037005, EVM0013978|EVM0013978, EVM0030559|EVM0030559, EVM0031408|EVM0031408, EVM00213…	710	12016	1937	37732	0.3665	2.22953e-06	****	0.000598489	***	EVM0021000|EVM0021000, EVM0011473|EVM0011473, EVM0005951|EVM0005951, EVM0000582|EVM0000582, EVM0029216|EVM0029216, EVM0021803|EVM0021803, EVM0027861|EVM0027861, EVM0028042|EVM0028042, EVM0023683|EVM0023683, EVM0004035|EVM0004035, EVM0013978|EVM0013978, EVM0021300|EVM0021300, EVM0000107|EVM0000107, EVM0015577|EVM0015577, EVM0035836|EVM0035836, EVM0037682|EVM0037682, EVM0029031|EVM0029031, EVM00397…	314	EVM0030201|EVM0030201, EVM0003410|EVM0003410, EVM0033239|EVM0033239, EVM0037005|EVM0037005, EVM0030559|EVM0030559, EVM0031408|EVM0031408, EVM0013629|EVM0013629, EVM0031101|EVM0031101, EVM0030108|EVM0030108, EVM0028588|EVM0028588, EVM0040262|EVM0040262, EVM0028465|EVM0028465, EVM0004659|EVM0004659, EVM0022338|EVM0022338, EVM0033703|EVM0033703, EVM0040684|EVM0040684, EVM0008228|EVM0008228, EVM00224…	396	1763	-3.40573
Molecular Function	GO:0004674	protein serine/threonine kinase activity	EVM0036527|EVM0036527, EVM0029146|EVM0029146, EVM0031460|EVM0031460, EVM0000459|EVM0000459, EVM0011682|EVM0011682, EVM0000991|EVM0000991, EVM0034736|EVM0034736, EVM0010702|EVM0010702, EVM0038116|EVM0038116, EVM0035543|EVM0035543, EVM0009095|EVM0009095, EVM0028071|EVM0028071, EVM0030559|EVM0030559, EVM0017767|EVM0017767, EVM0027878|EVM0027878, EVM0023930|EVM0023930, EVM0026444|EVM0026444, EVM00256…	604	12016	1394	37732	0.4333	3.6453e-20	****	1.56566e-16	****	EVM0036527|EVM0036527, EVM0031460|EVM0031460, EVM0000991|EVM0000991, EVM0034736|EVM0034736, EVM0010702|EVM0010702, EVM0038116|EVM0038116, EVM0035543|EVM0035543, EVM0017767|EVM0017767, EVM0027878|EVM0027878, EVM0023930|EVM0023930, EVM0026444|EVM0026444, EVM0025652|EVM0025652, EVM0028248|EVM0028248, EVM0018652|EVM0018652, EVM0033100|EVM0033100, EVM0011788|EVM0011788, EVM0016850|EVM0016850, EVM00383…	326	EVM0029146|EVM0029146, EVM0000459|EVM0000459, EVM0011682|EVM0011682, EVM0009095|EVM0009095, EVM0028071|EVM0028071, EVM0030559|EVM0030559, EVM0011973|EVM0011973, EVM0035801|EVM0035801, EVM0039567|EVM0039567, EVM0026935|EVM0026935, EVM0024505|EVM0024505, EVM0007462|EVM0007462, EVM0001468|EVM0001468, EVM0010158|EVM0010158, EVM0007405|EVM0007405, EVM0007364|EVM0007364, EVM0002669|EVM0002669, EVM00285…	278	1322	1.6777
	GO:0043531	ADP binding	EVM0022643|EVM0022643, EVM0030201|EVM0030201, EVM0000839|EVM0000839, EVM0027793|EVM0027793, EVM0018812|EVM0018812, EVM0037464|EVM0037464, EVM0035427|EVM0035427, EVM0023307|EVM0023307, EVM0035041|EVM0035041, EVM0039883|EVM0039883, EVM0024100|EVM0024100, EVM0042504|EVM0042504, EVM0034637|EVM0034637, EVM0001372|EVM0001372, EVM0015862|EVM0015862, EVM0008985|EVM0008985, EVM0037005|EVM0037005, EVM00139…	184	12016	366	37732	0.5027	1.56137e-13	****	1.34122e-10	****	EVM0022643|EVM0022643, EVM0000839|EVM0000839, EVM0027793|EVM0027793, EVM0018812|EVM0018812, EVM0037464|EVM0037464, EVM0035427|EVM0035427, EVM0023307|EVM0023307, EVM0035041|EVM0035041, EVM0039883|EVM0039883, EVM0024100|EVM0024100, EVM0034637|EVM0034637, EVM0001372|EVM0001372, EVM0008985|EVM0008985, EVM0013978|EVM0013978, EVM0042039|EVM0042039, EVM0027172|EVM0027172, EVM0029573|EVM0029573, EVM00142…	127	EVM0030201|EVM0030201, EVM0042504|EVM0042504, EVM0015862|EVM0015862, EVM0037005|EVM0037005, EVM0004525|EVM0004525, EVM0022338|EVM0022338, EVM0008228|EVM0008228, EVM0001661|EVM0001661, EVM0017773|EVM0017773, EVM0026016|EVM0026016, EVM0027781|EVM0027781, EVM0005539|EVM0005539, EVM0006698|EVM0006698, EVM0019940|EVM0019940, EVM0002504|EVM0002504, EVM0036938|EVM0036938, EVM0037057|EVM0037057, EVM00142…	57	363	5.30113
	GO:0080043	quercetin 3-O-glucosyltransferase activity	EVM0000510|EVM0000510, EVM0005369|EVM0005369, EVM0014747|EVM0014747, EVM0001281|EVM0001281, EVM0026501|EVM0026501, EVM0026761|EVM0026761, EVM0027447|EVM0027447, EVM0024259|EVM0024259, EVM0041185|EVM0041185, EVM0031130|EVM0031130, EVM0041773|EVM0041773, EVM0035471|EVM0035471, EVM0035517|EVM0035517, EVM0027064|EVM0027064, EVM0006645|EVM0006645, EVM0029816|EVM0029816, EVM0013404|EVM0013404, EVM00064…	98	12016	203	37732	0.4828	7.58983e-07	****	0.000255195	***	EVM0000510|EVM0000510, EVM0005369|EVM0005369, EVM0014747|EVM0014747, EVM0001281|EVM0001281, EVM0026761|EVM0026761, EVM0027447|EVM0027447, EVM0024259|EVM0024259, EVM0041185|EVM0041185, EVM0031130|EVM0031130, EVM0041773|EVM0041773, EVM0035517|EVM0035517, EVM0006645|EVM0006645, EVM0013404|EVM0013404, EVM0006421|EVM0006421, EVM0037018|EVM0037018, EVM0019207|EVM0019207, EVM0033296|EVM0033296, EVM00086…	58	EVM0026501|EVM0026501, EVM0035471|EVM0035471, EVM0027064|EVM0027064, EVM0029816|EVM0029816, EVM0032068|EVM0032068, EVM0008152|EVM0008152, EVM0020418|EVM0020418, EVM0023119|EVM0023119, EVM0005218|EVM0005218, EVM0024748|EVM0024748, EVM0002238|EVM0002238, EVM0034946|EVM0034946, EVM0035557|EVM0035557, EVM0027116|EVM0027116, EVM0010225|EVM0010225, EVM0000742|EVM0000742, EVM0021419|EVM0021419, EVM00355…	40	189	1.52753
	GO:0080044	quercetin 7-O-glucosyltransferase activity	EVM0000510|EVM0000510, EVM0005369|EVM0005369, EVM0014747|EVM0014747, EVM0001281|EVM0001281, EVM0026501|EVM0026501, EVM0026761|EVM0026761, EVM0027447|EVM0027447, EVM0024259|EVM0024259, EVM0041185|EVM0041185, EVM0031130|EVM0031130, EVM0041773|EVM0041773, EVM0035471|EVM0035471, EVM0035517|EVM0035517, EVM0027064|EVM0027064, EVM0006645|EVM0006645, EVM0029816|EVM0029816, EVM0013404|EVM0013404, EVM00064…	98	12016	203	37732	0.4828	7.58983e-07	****	0.000255195	***	EVM0000510|EVM0000510, EVM0005369|EVM0005369, EVM0014747|EVM0014747, EVM0001281|EVM0001281, EVM0026761|EVM0026761, EVM0027447|EVM0027447, EVM0024259|EVM0024259, EVM0041185|EVM0041185, EVM0031130|EVM0031130, EVM0041773|EVM0041773, EVM0035517|EVM0035517, EVM0006645|EVM0006645, EVM0013404|EVM0013404, EVM0006421|EVM0006421, EVM0037018|EVM0037018, EVM0019207|EVM0019207, EVM0033296|EVM0033296, EVM00086…	58	EVM0026501|EVM0026501, EVM0035471|EVM0035471, EVM0027064|EVM0027064, EVM0029816|EVM0029816, EVM0032068|EVM0032068, EVM0008152|EVM0008152, EVM0020418|EVM0020418, EVM0023119|EVM0023119, EVM0005218|EVM0005218, EVM0024748|EVM0024748, EVM0002238|EVM0002238, EVM0034946|EVM0034946, EVM0035557|EVM0035557, EVM0027116|EVM0027116, EVM0010225|EVM0010225, EVM0000742|EVM0000742, EVM0021419|EVM0021419, EVM00355…	40	189	1.52753
	GO:0016538	cyclin-dependent protein serine/threonine kinase regulator activity	EVM0026968|EVM0026968, EVM0031790|EVM0031790, EVM0029111|EVM0029111, EVM0039616|EVM0039616, EVM0008163|EVM0008163, EVM0009202|EVM0009202, EVM0007507|EVM0007507, EVM0033297|EVM0033297, EVM0028008|EVM0028008, EVM0031226|EVM0031226, EVM0009871|EVM0009871, EVM0025390|EVM0025390, EVM0005228|EVM0005228, EVM0027278|EVM0027278, EVM0031275|EVM0031275, EVM0000059|EVM0000059, EVM0000244|EVM0000244, EVM00148…	32	12016	48	37732	0.6667	7.72417e-07	****	0.000255195	***	EVM0008163|EVM0008163, EVM0027880|EVM0027880	2	EVM0026968|EVM0026968, EVM0031790|EVM0031790, EVM0029111|EVM0029111, EVM0039616|EVM0039616, EVM0009202|EVM0009202, EVM0007507|EVM0007507, EVM0033297|EVM0033297, EVM0028008|EVM0028008, EVM0031226|EVM0031226, EVM0009871|EVM0009871, EVM0025390|EVM0025390, EVM0005228|EVM0005228, EVM0027278|EVM0027278, EVM0031275|EVM0031275, EVM0000059|EVM0000059, EVM0000244|EVM0000244, EVM0014831|EVM0014831, EVM00104…	30	48	-4.33013
	GO:0016301	kinase activity	EVM0036527|EVM0036527, EVM0011428|EVM0011428, EVM0000459|EVM0000459, EVM0015311|EVM0015311, EVM0000991|EVM0000991, EVM0034736|EVM0034736, EVM0038116|EVM0038116, EVM0035543|EVM0035543, EVM0033886|EVM0033886, EVM0028071|EVM0028071, EVM0007872|EVM0007872, EVM0030559|EVM0030559, EVM0026444|EVM0026444, EVM0025652|EVM0025652, EVM0016652|EVM0016652, EVM0011973|EVM0011973, EVM0028465|EVM0028465, EVM00283…	450	12016	1176	37732	0.3827	1.29927e-06	****	0.000398597	***	EVM0036527|EVM0036527, EVM0011428|EVM0011428, EVM0015311|EVM0015311, EVM0000991|EVM0000991, EVM0034736|EVM0034736, EVM0038116|EVM0038116, EVM0035543|EVM0035543, EVM0033886|EVM0033886, EVM0007872|EVM0007872, EVM0026444|EVM0026444, EVM0025652|EVM0025652, EVM0016652|EVM0016652, EVM0028349|EVM0028349, EVM0026227|EVM0026227, EVM0000618|EVM0000618, EVM0031425|EVM0031425, EVM0039621|EVM0039621, EVM00306…	210	EVM0000459|EVM0000459, EVM0028071|EVM0028071, EVM0030559|EVM0030559, EVM0011973|EVM0011973, EVM0028465|EVM0028465, EVM0007462|EVM0007462, EVM0026138|EVM0026138, EVM0001468|EVM0001468, EVM0018683|EVM0018683, EVM0007364|EVM0007364, EVM0028505|EVM0028505, EVM0008381|EVM0008381, EVM0006677|EVM0006677, EVM0032906|EVM0032906, EVM0040858|EVM0040858, EVM0003532|EVM0003532, EVM0037864|EVM0037864, EVM00002…	240	1140	-1.45125
	GO:0003700	DNA-binding transcription factor activity	EVM0034013|EVM0034013, EVM0023502|EVM0023502, EVM0036678|EVM0036678, EVM0033184|EVM0033184, EVM0025945|EVM0025945, EVM0020360|EVM0020360, EVM0018989|EVM0018989, EVM0000832|EVM0000832, EVM0005030|EVM0005030, EVM0023056|EVM0023056, EVM0026513|EVM0026513, EVM0042386|EVM0042386, EVM0014226|EVM0014226, EVM0002092|EVM0002092, EVM0039176|EVM0039176, EVM0020187|EVM0020187, EVM0007307|EVM0007307, EVM00368…	873	12016	2412	37732	0.3619	1.51277e-06	****	0.000433156	***	EVM0034013|EVM0034013, EVM0023502|EVM0023502, EVM0036678|EVM0036678, EVM0033184|EVM0033184, EVM0025945|EVM0025945, EVM0018989|EVM0018989, EVM0000832|EVM0000832, EVM0005030|EVM0005030, EVM0023056|EVM0023056, EVM0026513|EVM0026513, EVM0042386|EVM0042386, EVM0014226|EVM0014226, EVM0002092|EVM0002092, EVM0039176|EVM0039176, EVM0020187|EVM0020187, EVM0007307|EVM0007307, EVM0036893|EVM0036893, EVM00025…	453	EVM0020360|EVM0020360, EVM0026359|EVM0026359, EVM0001639|EVM0001639, EVM0040183|EVM0040183, EVM0009224|EVM0009224, EVM0028748|EVM0028748, EVM0024088|EVM0024088, EVM0042575|EVM0042575, EVM0026521|EVM0026521, EVM0039030|EVM0039030, EVM0035509|EVM0035509, EVM0004310|EVM0004310, EVM0010709|EVM0010709, EVM0007947|EVM0007947, EVM0021707|EVM0021707, EVM0005967|EVM0005967, EVM0024497|EVM0024497, EVM00351…	420	2269	0.461855
	GO:0004672	protein kinase activity	EVM0036527|EVM0036527, EVM0000459|EVM0000459, EVM0011682|EVM0011682, EVM0000991|EVM0000991, EVM0034736|EVM0034736, EVM0038116|EVM0038116, EVM0028071|EVM0028071, EVM0030559|EVM0030559, EVM0017767|EVM0017767, EVM0028248|EVM0028248, EVM0016652|EVM0016652, EVM0012350|EVM0012350, EVM0011973|EVM0011973, EVM0028465|EVM0028465, EVM0039567|EVM0039567, EVM0000618|EVM0000618, EVM0039621|EVM0039621, EVM00387…	185	12016	444	37732	0.4167	7.62133e-06	****	0.0014232	**	EVM0036527|EVM0036527, EVM0000991|EVM0000991, EVM0034736|EVM0034736, EVM0038116|EVM0038116, EVM0017767|EVM0017767, EVM0028248|EVM0028248, EVM0016652|EVM0016652, EVM0000618|EVM0000618, EVM0039621|EVM0039621, EVM0030636|EVM0030636, EVM0039122|EVM0039122, EVM0015757|EVM0015757, EVM0032924|EVM0032924, EVM0004592|EVM0004592, EVM0012642|EVM0012642, EVM0028346|EVM0028346, EVM0040444|EVM0040444, EVM00173…	79	EVM0000459|EVM0000459, EVM0011682|EVM0011682, EVM0028071|EVM0028071, EVM0030559|EVM0030559, EVM0012350|EVM0012350, EVM0011973|EVM0011973, EVM0028465|EVM0028465, EVM0039567|EVM0039567, EVM0038770|EVM0038770, EVM0007462|EVM0007462, EVM0001468|EVM0001468, EVM0010158|EVM0010158, EVM0007405|EVM0007405, EVM0007364|EVM0007364, EVM0028505|EVM0028505, EVM0012423|EVM0012423, EVM0027620|EVM0027620, EVM00329…	106	430	-1.7843
	GO:0016747	acyltransferase activity, transferring groups other than amino-acyl groups	EVM0042125|EVM0042125, EVM0000028|EVM0000028, EVM0003791|EVM0003791, EVM0024334|EVM0024334, EVM0029298|EVM0029298, EVM0022264|EVM0022264, EVM0008703|EVM0008703, EVM0010381|EVM0010381, EVM0021677|EVM0021677, EVM0027557|EVM0027557, EVM0020153|EVM0020153, EVM0034568|EVM0034568, EVM0028209|EVM0028209, EVM0016670|EVM0016670, EVM0010946|EVM0010946, EVM0012816|EVM0012816, EVM0034022|EVM0034022, EVM00120…	56	12016	107	37732	0.5234	8.71277e-06	****	0.00155922	**	EVM0000028|EVM0000028, EVM0003791|EVM0003791, EVM0029298|EVM0029298, EVM0008703|EVM0008703, EVM0010381|EVM0010381, EVM0020153|EVM0020153, EVM0016670|EVM0016670, EVM0012816|EVM0012816, EVM0012094|EVM0012094, EVM0010839|EVM0010839, EVM0031789|EVM0031789, EVM0022873|EVM0022873, EVM0029210|EVM0029210, EVM0027240|EVM0027240, EVM0017737|EVM0017737, EVM0013406|EVM0013406, EVM0011098|EVM0011098, EVM00015…	24	EVM0042125|EVM0042125, EVM0024334|EVM0024334, EVM0022264|EVM0022264, EVM0021677|EVM0021677, EVM0027557|EVM0027557, EVM0034568|EVM0034568, EVM0028209|EVM0028209, EVM0010946|EVM0010946, EVM0034022|EVM0034022, EVM0031117|EVM0031117, EVM0029405|EVM0029405, EVM0006254|EVM0006254, EVM0013621|EVM0013621, EVM0029493|EVM0029493, EVM0041341|EVM0041341, EVM0032543|EVM0032543, EVM0001699|EVM0001699, EVM00133…	32	96	-0.816497
	GO:0005524	ATP binding	EVM0036527|EVM0036527, EVM0022643|EVM0022643, EVM0030201|EVM0030201, EVM0004936|EVM0004936, EVM0024279|EVM0024279, EVM0011428|EVM0011428, EVM0002990|EVM0002990, EVM0024171|EVM0024171, EVM0000459|EVM0000459, EVM0011682|EVM0011682, EVM0015311|EVM0015311, EVM0000991|EVM0000991, EVM0034325|EVM0034325, EVM0034736|EVM0034736, EVM0024100|EVM0024100, EVM0001372|EVM0001372, EVM0041377|EVM0041377, EVM00355…	815	12016	2278	37732	0.3578	2.10888e-05	****	0.00339848	**	EVM0036527|EVM0036527, EVM0022643|EVM0022643, EVM0004936|EVM0004936, EVM0024279|EVM0024279, EVM0011428|EVM0011428, EVM0002990|EVM0002990, EVM0015311|EVM0015311, EVM0000991|EVM0000991, EVM0034325|EVM0034325, EVM0034736|EVM0034736, EVM0024100|EVM0024100, EVM0001372|EVM0001372, EVM0041377|EVM0041377, EVM0035543|EVM0035543, EVM0033886|EVM0033886, EVM0013978|EVM0013978, EVM0040942|EVM0040942, EVM00177…	401	EVM0030201|EVM0030201, EVM0024171|EVM0024171, EVM0000459|EVM0000459, EVM0011682|EVM0011682, EVM0032225|EVM0032225, EVM0036056|EVM0036056, EVM0028071|EVM0028071, EVM0037005|EVM0037005, EVM0030559|EVM0030559, EVM0012350|EVM0012350, EVM0011973|EVM0011973, EVM0028465|EVM0028465, EVM0022338|EVM0022338, EVM0039567|EVM0039567, EVM0026935|EVM0026935, EVM0008228|EVM0008228, EVM0001661|EVM0001661, EVM00285…	414	2210	-2.6377
	GO:0004553	hydrolase activity, hydrolyzing O-glycosyl compounds	EVM0003433|EVM0003433, EVM0029797|EVM0029797, EVM0031101|EVM0031101, EVM0036959|EVM0036959, EVM0003455|EVM0003455, EVM0017677|EVM0017677, EVM0024867|EVM0024867, EVM0016902|EVM0016902, EVM0011594|EVM0011594, EVM0031768|EVM0031768, EVM0012641|EVM0012641, EVM0022448|EVM0022448, EVM0037302|EVM0037302, EVM0037260|EVM0037260, EVM0038982|EVM0038982, EVM0009491|EVM0009491, EVM0041925|EVM0041925, EVM00238…	106	12016	237	37732	0.4473	2.13641e-05	****	0.00339848	**	EVM0003433|EVM0003433, EVM0003455|EVM0003455, EVM0017677|EVM0017677, EVM0024867|EVM0024867, EVM0016902|EVM0016902, EVM0011594|EVM0011594, EVM0038982|EVM0038982, EVM0009491|EVM0009491, EVM0041925|EVM0041925, EVM0028785|EVM0028785, EVM0001566|EVM0001566, EVM0018022|EVM0018022, EVM0036452|EVM0036452, EVM0020786|EVM0020786, EVM0037905|EVM0037905, EVM0020008|EVM0020008, EVM0031852|EVM0031852, EVM00164…	47	EVM0029797|EVM0029797, EVM0031101|EVM0031101, EVM0036959|EVM0036959, EVM0031768|EVM0031768, EVM0012641|EVM0012641, EVM0022448|EVM0022448, EVM0037302|EVM0037302, EVM0037260|EVM0037260, EVM0023804|EVM0023804, EVM0005316|EVM0005316, EVM0016749|EVM0016749, EVM0019133|EVM0019133, EVM0030534|EVM0030534, EVM0011980|EVM0011980, EVM0038955|EVM0038955, EVM0027481|EVM0027481, EVM0024715|EVM0024715, EVM00424…	59	220	-2.22486
	GO:0016709	oxidoreductase activity, acting on paired donors, with incorporation or reduction of molecular oxygen, NAD(P)H as one donor, and incorporation of one atom of oxygen	EVM0029464|EVM0029464, EVM0018097|EVM0018097, EVM0020899|EVM0020899, EVM0036453|EVM0036453, EVM0000334|EVM0000334, EVM0022462|EVM0022462, EVM0019118|EVM0019118, EVM0025521|EVM0025521, EVM0002673|EVM0002673, EVM0016840|EVM0016840, EVM0020007|EVM0020007, EVM0001230|EVM0001230, EVM0012709|EVM0012709, EVM0013791|EVM0013791, EVM0028436|EVM0028436, EVM0010137|EVM0010137, EVM0036576|EVM0036576, EVM00049…	82	12016	178	37732	0.4607	4.96132e-05	****	0.00761031	**	EVM0029464|EVM0029464, EVM0018097|EVM0018097, EVM0000334|EVM0000334, EVM0022462|EVM0022462, EVM0019118|EVM0019118, EVM0025521|EVM0025521, EVM0002673|EVM0002673, EVM0016840|EVM0016840, EVM0020007|EVM0020007, EVM0001230|EVM0001230, EVM0010137|EVM0010137, EVM0036576|EVM0036576, EVM0004947|EVM0004947, EVM0030066|EVM0030066, EVM0004472|EVM0004472, EVM0021659|EVM0021659, EVM0000661|EVM0000661, EVM00309…	56	EVM0020899|EVM0020899, EVM0036453|EVM0036453, EVM0012709|EVM0012709, EVM0013791|EVM0013791, EVM0028436|EVM0028436, EVM0003687|EVM0003687, EVM0032529|EVM0032529, EVM0028655|EVM0028655, EVM0000721|EVM0000721, EVM0032323|EVM0032323, EVM0003757|EVM0003757, EVM0031936|EVM0031936, EVM0032401|EVM0032401, EVM0033013|EVM0033013, EVM0017648|EVM0017648, EVM0012953|EVM0012953, EVM0017995|EVM0017995, EVM00030…	26	162	3.22126
	GO:0004364	glutathione transferase activity	EVM0023021|EVM0023021, EVM0002728|EVM0002728, EVM0003194|EVM0003194, EVM0034377|EVM0034377, EVM0012872|EVM0012872, EVM0017481|EVM0017481, EVM0004157|EVM0004157, EVM0002355|EVM0002355, EVM0016168|EVM0016168, EVM0001965|EVM0001965, EVM0012673|EVM0012673, EVM0021001|EVM0021001, EVM0039404|EVM0039404, EVM0014000|EVM0014000, EVM0019704|EVM0019704, EVM0032098|EVM0032098, EVM0015872|EVM0015872, EVM00028…	43	12016	81	37732	0.5309	5.96549e-05	****	0.00883509	**	EVM0023021|EVM0023021, EVM0002728|EVM0002728, EVM0003194|EVM0003194, EVM0034377|EVM0034377, EVM0017481|EVM0017481, EVM0002355|EVM0002355, EVM0001965|EVM0001965, EVM0039404|EVM0039404, EVM0014000|EVM0014000, EVM0032098|EVM0032098, EVM0015872|EVM0015872, EVM0002874|EVM0002874, EVM0010765|EVM0010765, EVM0038271|EVM0038271, EVM0005100|EVM0005100, EVM0018271|EVM0018271, EVM0036408|EVM0036408, EVM00040…	32	EVM0012872|EVM0012872, EVM0004157|EVM0004157, EVM0016168|EVM0016168, EVM0012673|EVM0012673, EVM0021001|EVM0021001, EVM0019704|EVM0019704, EVM0022068|EVM0022068, EVM0039897|EVM0039897, EVM0039141|EVM0039141, EVM0011367|EVM0011367, EVM0008339|EVM0008339	11	79	2.25018
