# Supplementary material
Source: Research Square preprint supplement (doi:10.21203/rs.3.rs-9020477/v1)
Supplement: Supplementary file 4 [file 9e37d1f9b3948769faf77775.xlsx]

## Sheet: shoot apex
Phytohormones	Gene name	Symbol	gene_id	FPKM.ZJ1	FPKM.ZJ2	FPKM.ZJ3	FPKM.CGJ1	FPKM.CGJ2	FPKM.CGJ3	fc	log2(fc)	pval	qval	regulation
Auxin biosynthesis	TRYPTOPHAN AMINOTRANSFERASE OF ARABIDOPSIS 1	TAA1	EVM0020980	0	0	0	0.240422	0.107836	0.119523	0.000641326	-10.6067	0.00155405	0.00309341	down
	YUCCA 1	YUC1	EVM0005496	0.092334	0.123486	0.319052	2.70593	1.32953	1.26655	0.100881	-3.30927	5.83918e-08	1.89087e-07	down
Auxin signaling	AUXIN RESPONSE FACTOR 10	ARF10/16/17	EVM0041437	2.12536	2.75153	2.43976	6.77188	6.9804	5.2442	0.385159	-1.37647	9.84733e-13	4.72573e-12	down
Auxin transport	ATP-BINDING CASSETTE B1	ABC(B)1	EVM0000187	3.4085	2.06784	2.31086	6.46004	5.59799	5.16667	0.452095	-1.1453	2.49366e-07	7.63462e-07	down
	PIN-LIKES 1	PILS 1	EVM0034292	39.4928	73.153	52.5039	11.4514	11.3906	12.4968	4.67333	2.22445	1.44263e-35	2.07668e-34	up
Brassinosteroid biosynthesis	DWARF 6	DET2	EVM0007518	0.910683	1.55436	1.0491	2.37301	2.45111	3.57524	0.418382	-1.25711	0.00363432	0.00684528	down
	DWARF 4	DWF4	EVM0042507	0.382275	0.322969	0.373239	0.986046	0.550172	0.994758	0.426113	-1.23069	0.0203492	0.0335454	down
Brassinosteroid signaling	BRASSINAZOLE-RESISTANT 1	BZR1	EVM0001604	18.4455	24.7846	20.4415	6.64651	8.2835	4.95044	3.20272	1.6793	8.48466e-19	5.96857e-18	up
Brassinosteroid transport	ATP-BINDING CASSETTE B19	ABCB19	EVM0016268	30.3465	17.5815	18.1696	64.9834	64.4865	58.9364	0.350824	-1.51118	6.43749e-15	3.5873e-14	down
Gibberellin biosynthesis	ENT-KAURENE OXIDASE 1	KO1	EVM0011564	1.13703	1.19253	0.758342	0.361023	0.499145	0.200282	2.91188	1.54195	0.00029634	0.000650009	up
	GIBBERELLIN 20-OXIDASE 3	GA20ox3	EVM0009219	1.30095	0.732732	0.705359	6.56779	6.15929	5.27739	0.152131	-2.71661	1.19218e-22	1.01476e-21	down
Gibberellin signaling	GA INSENSITIVE DWARF1A	GID1A	EVM0027648	2.32226	2.12182	1.65822	0.464961	0.389603	0.670807	4.00054	2.00019	1.14741e-08	3.96025e-08	up
Strigolactone biosynthesis	CAROTENOID CLEAVAGE DIOXYGENASE 8	CCD8 (MAX4)	EVM0007707	0	0	0	0.066095	0	0.228706	0.00101764	-9.94056	0.0177668	0.0296092	down
	LATERAL BRANCHING OXIDOREDUCTASE 1	LBO1	EVM0012884	3.24113	4.06102	4.26406	15.1541	14.2312	13.5109	0.269632	-1.89093	4.82338e-31	5.91714e-30	down
Strigolactone signaling	MORE AXILLARY BRANCHES 2	MAX2	EVM0017280	30.8424	35.082	42.553	4.03896	5.53056	3.81218	8.1064	3.01906	4.09797e-80	1.99123e-78	up
	SUPPRESSOR OF MORE AXILLARY GROWTH2-LIKE 6	SMXL6 (D53)	EVM0041100	66.3965	39.3767	46.4026	16.9438	16.0224	16.8019	3.0577	1.61245	6.88136e-28	7.42505e-27	up
	DWARF14	D14	EVM0032611	74.4348	59.9574	62.4896	27.5156	28.0288	26.0439	2.41312	1.2709	1.69964e-36	2.53274e-35	up
Abscisic acid biosynthesis	LUTEIN DEFICIENT 5	LUT5 (CYP97A3)	EVM0035296	2.33559	2.35623	2.02199	5.79302	5.09765	5.8147	0.401895	-1.31511	7.79297e-11	3.24075e-10	down
	ABSCISIC ALDEHYDE OXIDASE 3	AAO3	EVM0000624	1.81396	1.67932	1.73341	0.586464	0.892532	0.674633	2.42692	1.27913	7.83412e-12	3.5262e-11	up
	NINE-CIS-EPOXYCAROTENOID DIOXYGENASE 3	NCED3	EVM0040794	9.92281	5.17627	8.3629	0.809652	0.89737	0.746828	9.56129	3.25721	1.24606e-44	2.41873e-43	up
	ZEAXANTHIN EPOXIDASE	ZEP (ABA1)	EVM0019254	43.9623	55.9452	46.519	9.66685	9.51394	7.7661	5.43389	2.44199	1.74851e-90	1.05445e-88	up
Abscisic acid signaling	GPCR-TYPE G PROTEIN 1	GTG1 (GPCR)	EVM0012429	1.54397	1.42133	2.30348	4.67308	3.45924	3.08753	0.469595	-1.09051	0.000321631	0.000702382	down
	SNF1-RELATED PROTEIN KINASE 2.2	SnRK2.2	EVM0040884	52.5764	63.9086	54.5274	27.0757	25.5286	22.7656	2.26898	1.18204	1.85933e-31	2.32145e-30	up
			EVM0042371	46.7765	55.0803	45.1462	18.1037	20.9443	16.9695	2.62423	1.3919	1.85072e-35	2.64777e-34	up
	ABA INSENSITIVE 1	ABI1 (PP2C group A)	EVM0008298	13.153	13.1653	12.5154	0.965646	0.87676	0.872603	14.3033	3.83828	5.2643e-204	1.76753e-201	up
	ABA-BINDING PROTEIN/Magnesium-Chelatase H Subunit	ABAR/CHLH	EVM0036056	11.3215	12.9391	11.9751	108.44	103.655	80.7966	0.123717	-3.01488	5.77318e-128	7.19601e-126	down
	G PROTEIN ALPHA SUBUNIT 1	GPA1	EVM0031196	28.3652	28.5248	31.729	15.5258	17.3061	17.3693	1.76528	0.819896	3.28776e-18	2.22784e-17	up
	CBL-INTERACTING PROTEIN KINASE 1	CIPK	EVM0032313	72.3497	73.2024	66.0146	27.9516	28.3296	30.2587	2.44473	1.28968	1.42543e-61	4.51354e-60	up
Abscisic acid transport	ABA-IMPORTING TRANSPORTER 1	AIT1	EVM0034155	1.44182	1.31641	0.945056	3.96883	3.1268	3.08357	0.36381	-1.45874	1.20824e-08	4.16326e-08	down
	DETOXIFICATION EFFLUX CARRIER 50	DTX50	EVM0006235	4.46503	1.29968	2.97797	0.038873	0	0.045743	103.322	6.691	5.81881e-23	5.01761e-22	up
Cytokinin biosynthesis	LONELY GUY 1	LOG1	EVM0013498	3.41909	2.24357	3.09165	5.71308	6.44757	6.68124	0.46462	-1.10588	0.000111889	0.000258888	down
	CYTOCHROME P450, FAMILY 735, SUBFAMILY A, POLYPEPTIDE 1	CYP35A1\CYP35A2	EVM0018085	0.270944	0.595246	0.291508	0	0	0	3858.99	11.914	5.81537e-08	1.88349e-07	up
Cytokinin signaling	Type-A ARABDIPOSIS RESPONSE REGULATOR 4	ARR-A4	EVM0040143	6.3339	5.09436	5.02231	20.2057	19.3173	22.2175	0.266447	-1.90808	1.65354e-32	2.15474e-31	down
Cytokinin signaling	ARABDIPOSIS HISTIDINE KINASE 4	AHK4 (CHK)	EVM0038426	6.8343	5.01204	5.51882	18.0833	15.9407	15.9205	0.347689	-1.52413	1.16523e-24	1.09581e-23	down
Ethylene biosynthesis	1-AMINOCYCLOPROPANE-1-CARBOXYLATE SYNTHASE1	ACS1	EVM0031578	2.46255	3.46513	5.26144	9.10951	10.4823	9.3429	0.386702	-1.37071	1.49312e-06	4.25015e-06	down
	1-AMINOCYCLOPROPANE-1-CARBOXYLATE OXIDASE1	ACO1	EVM0036416	32.8998	37.7041	28.2478	0.076641	0.431449	0.271358	126.823	6.98667	7.76858e-39	1.25174e-37	up
Ethylene signaling	ETHYLENE INSENSITIVE3	EIN3	EVM0009506	41.9161	37.8422	43.3246	15.0409	16.4997	11.2088	2.87917	1.52565	5.74076e-34	7.85146e-33	up
			EVM0008261	51.454	48.5442	53.9749	14.8219	17.057	11.569	3.54385	1.82532	6.60875e-50	1.5092e-48	up
	ETHYLENE RESPONSE FACTOR 1	ERF1	EVM0030574	1.37631	1.36274	1.02257	0.264215	0.194781	0.512491	3.87202	1.95309	0.000476279	0.00101693	up
Jasmonate biosynthesis	OXOPHYTODIENOATE-REDUCTASE 3	OPR3	EVM0006505	242.995	214.894	215.361	69.197	84.5796	84.9889	2.81971	1.49555	3.6612e-55	9.75334e-54	up
	JASMONATE RESISTANT 1	JAR1	EVM0001797	19.5371	20.9139	18.6306	10.5618	8.90314	9.53948	2.03699	1.02644	7.65551e-24	6.91668e-23	up
Salicylic acid biosynthesis	HXXXD-type acyl-transferase family protein	EPS1	EVM0011098	0.657921	0.72545	1.91135	0.077145	0.204975	0.092396	8.79729	3.13706	4.25291e-07	1.27505e-06	up
	Auxin-responsive GH3 family protein	PBS3	EVM0017066	0.351917	0.255396	0.569475	2.44362	1.81374	1.43677	0.206667	-2.27462	4.00928e-08	1.3187e-07	down
	PHE AMMONIA LYASE 1	PAL1	EVM0041519	106.594	82.2178	89.1685	204.096	192.67	164.388	0.495373	-1.01341	1.15073e-13	5.88136e-13	down
			EVM0025866	95.8643	75.031	79.5715	205.105	192.138	154.536	0.453925	-1.13947	2.37099e-15	1.35653e-14	down
	ABERRANT LATERAL ROOT FORMATION 1	AAAT	EVM0007213	8.70655	7.09432	6.93562	3.13505	3.04065	2.67321	2.56941	1.36144	1.09152e-16	6.76418e-16	up
	HYDROXYPHENYLPYRUVATE REDUCTASE 4	PPAR	EVM0029029	33.0423	43.7158	41.4171	18.3524	15.5882	16.6295	2.33686	1.22457	2.10044e-22	1.76668e-21	up
Salicylic acid signaling	NONEXPRESSER OF PR GENES 1	NPR1	EVM0016693	2.15763	1.68908	1.82747	0.622842	0.427838	0.817778	3.03683	1.60257	1.21906e-08	4.1986e-08	up
	TGACG SEQUENCE-SPECIFIC BINDING PROTEIN 1	TGA1	EVM0033502	12.298	11.6708	11.1141	1.72503	1.68099	2.68342	5.76128	2.52639	2.45907e-37	3.77459e-36	up
