# Supplementary material
Source: Research Square preprint supplement (doi:10.21203/rs.3.rs-9020477/v1)
Supplement: Supplementary file 5 [file d49a8e21fa826d75ba76c074.xlsx]

## Sheet: Sheet1
List of characterized glycosyl hydrolase (GH), glycosyl transferase (GT), carbohydrate esterase (CE), and polysaccharide lyase (PL) classes involved in cell wall biosynthesis and degradation
Backbone, Sidechain, Degradation, Modification	Polysaccharide	Subfam name	Enzyme name	Enzyme ID	Pyrus pyrifolia cv. Cuiguan ID	Function	Species	PubMed ID	FPKM.CGJ1	FPKM.CGJ2	FPKM.CGJ3	FPKM.ZJ1	FPKM.ZJ2	FPKM.ZJ3
B			CslA2	AT5G22740	EVM0029228	β-1,4-mannan synthase	Arabidopsis thaliana	15647349	79.3614	72.882	62.805	29.5276	25.9142	28.4667
	Xylan	IRX7/F8H (GT47)	IRX7	AT2G28110	EVM0001088	Glucuronoxylan Biosynthesis	Arabidopsis thaliana	17322407	18.8127	16.2767	16.4277	6.79006	4.49017	4.38722
					EVM0005604				12.1652	11.6193	11.6441	4.33271	5.70787	2.34192
	Xylan	IRX9/IRX9-L (GT43) **	IRX9	AT2G37090	EVM0021398	Xylan xylosyltransferase	Arabidopsis thaliana	20424005	2.79011	2.56588	4.27004	2.217	1.53033	0.758913
	Xylan	IRX8 (GT8)	IRX8	AT5G54690	EVM0008880	Xylan galacturonosyltransferase	Arabidopsis thaliana	17322407	0.916572	0.917695	0.782945	4.64231	2.97241	1.32835
	RG-I	RRT1-4 (GT106)	RRT1	AT5G15740	EVM0040107	α-1,2-rhamnosyltransferases	Arabidopsis thaliana	30082766	13.1203	12.0685	12.082	5.30956	3.72516	4.02722
					EVM0039221				12.3792	10.8329	10.1643	1.28593	0.849189	1.83546
	AGP	GALT2-6 (GT31)	GALT2	AT4G21060	EVM0016345	hydroxyproline O-galactosyltransferase	Arabidopsis thaliana	23430255	20.2652	20.2189	17.7597	7.52461	7.2199	7.94924
S	Mannan	GMGT1 (GT34)	GMGT1	AT2G22900	EVM0038456	galactomannan α-1,6-galactosyltransferase	Arabidopsis thaliana	26220953	5.52885	6.34701	5.2508	1.9289	3.60553	2.98457
	Xyloglucan	XXT1-5 (GT34)	XT1	AT3G62720	EVM0014799	xyloglucan α-1,6-xylosyltransferase	Arabidopsis thaliana	12032363	12.3728	10.5394	11.2183	4.24693	4.38225	4.24474
	Xylan	GUX1-5 (GT8)	GUX1	AT3G18660	EVM0020399	Xylan α-glucuronyltransferase	Arabidopsis thaliana	20852069	7.73113	7.61586	7.46285	4.13265	3.66484	3.58645
	AGP	GALT31A/GALT8/KNS4 (GT31)	GALT31A	AT1G32930	EVM0012106	β–1,6-galactosyltransferase / β–1,3-galactosyltransferase	Arabidopsis thaliana	23837821	14.8017	12.9423	15.4952	6.2539	4.77988	4.71358
	Cellulose/MLG/β-glucan	CslP (GT2) *	CesA1	AT1G22015	EVM0011292	β–1,3-galactosyltransferase	Arabidopsis thaliana	34113372	34.5278	38.0709	35.273	80.5233	88.4369	87.168
	AGP	GALT29A (GT29)	GALT29A	AT1G08280	EVM0004030	β-1,6-galactosyltransferase	Arabidopsis thaliana	24693939	1.69497	2.38165	1.86859	0	0.267804	0.380596
	AGP	GlcAT14A-E (GT14)	GlcAT14A	AT5G39990	EVM0006210	β –glucuronosyltransferase	Arabidopsis thaliana	24128328	9.13741	7.2063	8.04816	2.23398	2.4924	3.26599
D			AGAL3	AT3G56310	EVM0036338	α-galactosidase	Arabidopsis thaliana	28981776	16.6419	19.0766	15.2872	67.6374	61.6094	63.8178
	Mannan	AGAL2-3 (GH27) **	AGAL2	AT5G08370	EVM0019425	α-galactosidase	Arabidopsis thaliana	28981776	9.98519	9.86862	11.317	42.0547	35.8071	35.5281
	Xyloglucan	AXY8 (GH95) *	AXY8	AT4G34260	EVM0018311	α-1,2-fucosidase	Arabidopsis thaliana	22080600	9.17451	9.38235	9.75844	4.97119	4.10985	4.11754
	Xyloglucan	BGAL10 (GH35)	BGAL10	AT5G63810	EVM0022278	β-1,2–galactosidase	Arabidopsis thaliana	22267505	20.4299	18.2648	17.6847	9.90044	8.6802	8.70329
	Xyloglucan	AXY3 (GH31)	AXY3	AT1G68560	EVM0029389	α-1,6-‐xylosidase	Arabidopsis thaliana	21170548	88.622	81.9805	72.6255	29.9253	31.7032	24.3654
					EVM0037260				105.31	98.6071	99.9791	24.44	21.3039	17.4676
	AGP	GH43A/GH43B (GH43_24) *	GH43A	AT5G67540	EVM0006239	exo-β-1,3-galactosidase	Arabidopsis thaliana	32493777	8.96136	9.90478	10.2854	3.63101	3.91958	4.22044
	AGP	APSE (GH27) *	APSE	AT3G26380	EVM0000492	β-L-arabinopyranosidase	Arabidopsis thaliana	28981776	1.23765	1.65034	1.40893	0.658344	0.48038	0.598362
	AGP	BXL1/BXL4 (GH3)	BXL1	AT5G49360	EVM0021291	α-L-arabinofuranosidase	Arabidopsis thaliana	19458117	1.06185	1.12588	1.24622	0.0972	0.103422	0.075866
	HG	GH28_3 (ADPG1) **	ADPG1	AT3G57510	EVM0010633	polygalacturonase	Arabidopsis thaliana	15022837	1.47314	1.23015	1.93182	0.790559	0.739748	0.785895
M	Xyloglucan	AXY4/AXY4L (DUF231)	AXY4	AT1G70230	EVM0005288	xyloglucan O-acetyltransferase	Arabidopsis thaliana	22086088	18.5046	17.2413	16.7493	4.20944	3.69633	4.88841
	Xyloglucan	IRX15/IRX15L (DUF579)	IRX15	AT3G50220	EVM0021820	Xylan O-methyltransferase	Arabidopsis thaliana	21288268	4.54131	3.1523	4.66302	2.17085	2.58495	1.15008
	AGP	AGM1-2 (PF04669)	AGM1	AT1G27930	EVM0034734	methylesterase	Arabidopsis thaliana	31245760	79.6007	71.0284	75.0825	10.131	11.0855	8.96142
