# Supplementary material
Source: Research Square preprint supplement (doi:10.21203/rs.3.rs-9020477/v1)
Supplement: Supplementary file 6 [file e76fc16d878d48c7c35e1695.xlsx]

## Sheet: Sheet 1
Pathway_ID
